# Supplementary material for: An enhanced workflow for variant interpretation in UniProtKB/Swiss-Prot improves consistency and reuse in ClinVar
Source: Database (Oxford). 2019 Apr 2;2019:baz040. doi: 10.1093/database/baz040 (PMC6444058; doi:10.1093/database/baz040)
Supplement: Famiglietti_SupplementaryTableS1_REV_baz040 [file famiglietti_supplementarytables1_rev_baz040.xlsx]

## Sheet: common
Gene	HGVS	UniProtKB VarID	ClinVar VarID	ClinVar conditions	ClinVar clinical significance	UniProtKB/Swiss-Prot classification	Concordance
A2ML1	NM_144670.5(A2ML1):c.4234A>G (p.Thr1412Ala)	VAR_055466	386368	not specified	Benign(Last reviewed: Jan 18, 2017)	Polymorphism	Y
AAAS	NM_015665.5(AAAS):c.787T>C (p.Ser263Pro)	VAR_012806	5045	Babinski sign|Glucocorticoid deficiency with achalasia|Hyperreflexia|Spastic paraparesis|not provided	Pathogenic/Likely pathogenic(Last reviewed: Sep 27, 2016)	Disease	Y
AARS	NM_001605.2(AARS):c.986G>A (p.Arg329His)	VAR_063527	8466	Charcot-Marie-Tooth disease|Charcot-Marie-Tooth disease, type 2|Charcot-Marie-Tooth disease, type 2N	Pathogenic(Last reviewed: Aug 18, 2015)	Disease	Y
AARS	NM_001605.2(AARS):c.824G>A (p.Gly275Asp)	VAR_028204	320348	Charcot-Marie-Tooth disease, type 2|Charcot-Marie-Tooth, Type 2	Benign/Likely benign(Last reviewed: Jan 18, 2017)	Polymorphism	Y
AARS2	NM_020745.3(AARS2):c.2548A>G (p.Met850Val)	VAR_057357	136218	Combined oxidative phosphorylation deficiency|not specified	Benign/Likely benign(Last reviewed: Jun 14, 2016)	Polymorphism	Y
AARS2	NM_020745.3(AARS2):c.2188G>A (p.Val730Met)	VAR_071842	136214	Combined oxidative phosphorylation deficiency|not specified	Benign/Likely benign(Last reviewed: Jun 14, 2016)	Unclassified	N
ABCA12	NM_173076.2(ABCA12):c.821A>G (p.Gln274Arg)	VAR_055475	235321	Congenital ichthyosiform erythroderma|not provided	Benign/Likely benign(Last reviewed: Jun 14, 2016)	Polymorphism	Y
ABCA12	NM_173076.2(ABCA12):c.859C>G (p.Arg287Gly)	VAR_055476	235771	Congenital ichthyosiform erythroderma|not provided	Benign/Likely benign(Last reviewed: Jun 14, 2016)	Polymorphism	Y
ABCA12	NM_173076.2(ABCA12):c.1649A>G (p.Glu550Gly)	VAR_027444	235381	Congenital ichthyosiform erythroderma|not provided	Benign/Likely benign(Last reviewed: Jun 14, 2016)	Polymorphism	Y
ABCA12	NM_173076.2(ABCA12):c.2329T>A (p.Ser777Thr)	VAR_027445	262824	Congenital ichthyosiform erythroderma|not specified	Benign(Last reviewed: Jun 14, 2016)	Polymorphism	Y
ABCA4	NM_000350.2(ABCA4):c.1411G>A (p.Glu471Lys)	VAR_008413	99052	not provided|not specified	Uncertain significance(Last reviewed: Jan 31, 2017)	Disease	N
ABCA4	NM_000350.2(ABCA4):c.1411G>A (p.Glu471Lys)	VAR_008413	99052	not provided|not specified	Uncertain significance(Last reviewed: Jan 31, 2017)	Disease	N
ABCA4	NM_000350.2(ABCA4):c.4283C>T (p.Thr1428Met)	VAR_008447	99271	Cone-Rod Dystrophy, Recessive|Macular degeneration|Retinitis Pigmentosa, Recessive|Stargardt Disease, Recessive|not provided|not specified	Benign/Likely benign(Last reviewed: Jun 14, 2016)	Disease	N
ABCA4	NM_000350.2(ABCA4):c.161G>A (p.Cys54Tyr)	VAR_008400	99065	Cone-rod dystrophy 3|Retinitis pigmentosa 19|Stargardt disease 1|not provided	Pathogenic/Likely pathogenic(Last reviewed: Jan 01, 2016)	Disease	Y
ABCA4	NM_000350.2(ABCA4):c.5882G>A (p.Gly1961Glu)	VAR_008475	7888	ABCA4-Related Disorders|Cone-rod dystrophy 3|MACULAR DEGENERATION, AGE-RELATED, 2, SUSCEPTIBILITY TO|Macular dystrophy|Retinal dystrophy|Stargardt disease 1|Stargardt disease 1|not provided	Pathogenic/Likely pathogenic, risk factor(Last reviewed: May 05, 2017)	Disease	Y
ABCA4	NM_000350.2(ABCA4):c.5882G>A (p.Gly1961Glu)	VAR_008475	7888	ABCA4-Related Disorders|Cone-rod dystrophy 3|MACULAR DEGENERATION, AGE-RELATED, 2, SUSCEPTIBILITY TO|Macular dystrophy|Retinal dystrophy|Stargardt disease 1|Stargardt disease 1|not provided	Pathogenic/Likely pathogenic, risk factor(Last reviewed: May 05, 2017)	Disease	Y
ABCA4	NM_000350.2(ABCA4):c.2894A>G (p.Asn965Ser)	VAR_008430	236096	Stargardt disease 1|not provided	Pathogenic(Last reviewed: Jan 05, 2016)	Disease	Y
ABCA4	NM_000350.2(ABCA4):c.3056C>T (p.Thr1019Met)	VAR_012554	289310	Stargardt disease 1|not provided	Pathogenic(Last reviewed: Oct 17, 2016)	Disease	Y
ABCA4	NM_000350.2(ABCA4):c.1804C>T (p.Arg602Trp)	VAR_008418	99084	Retinal dystrophy|Stargardt disease 1|not provided	Pathogenic/Likely pathogenic(Last reviewed: Jan 22, 2016)	Disease	Y
ABCA4	NM_000350.2(ABCA4):c.1957C>T (p.Arg653Cys)	VAR_012529	99108	Stargardt disease 1|not provided	Likely pathogenic(Last reviewed: Jan 31, 2017)	Disease	Y
ABCA4	NM_000350.2(ABCA4):c.3064G>A (p.Glu1022Lys)	VAR_012555	99196	Stargardt disease 1|not provided	Likely pathogenic(Last reviewed: Oct 12, 2016)	Disease	Y
ABCA4	NM_000350.2(ABCA4):c.3322C>T (p.Arg1108Cys)	VAR_012562	92867	Stargardt disease 1|not provided	Pathogenic/Likely pathogenic(Last reviewed: Mar 28, 2016)	Disease	Y
ABCA4	NM_000350.2(ABCA4):c.3322C>T (p.Arg1108Cys)	VAR_012562	92867	Stargardt disease 1|not provided	Pathogenic/Likely pathogenic(Last reviewed: Mar 28, 2016)	Disease	Y
ABCA4	NM_000350.2(ABCA4):c.4139C>T (p.Pro1380Leu)	VAR_008443	7904	MACULAR DEGENERATION, AGE-RELATED, 2, SUSCEPTIBILITY TO|Mandibulofacial dysostosis with mental deficiency|Stargardt disease 1|not provided	Pathogenic/Likely pathogenic, risk factor(Last reviewed: Mar 08, 2017)	Disease	Y
ABCA4	NM_000350.2(ABCA4):c.4457C>T (p.Pro1486Leu)	VAR_008452	99283	Stargardt disease 1|not provided	Pathogenic/Likely pathogenic(Last reviewed: Nov 18, 2016)	Disease	Y
ABCA4	NM_000350.2(ABCA4):c.4462T>C (p.Cys1488Arg)	VAR_008453	99284	Stargardt disease 1|not provided	Pathogenic/Likely pathogenic(Last reviewed: Oct 12, 2016)	Disease	Y
ABCA4	NM_000350.2(ABCA4):c.4462T>C (p.Cys1488Arg)	VAR_008453	99284	Stargardt disease 1|not provided	Pathogenic/Likely pathogenic(Last reviewed: Oct 12, 2016)	Disease	Y
ABCA4	NM_000350.2(ABCA4):c.4577C>T (p.Thr1526Met)	VAR_008456	99303	Retinitis pigmentosa 19|Stargardt disease 1|not provided	Pathogenic/Likely pathogenic(Last reviewed: Apr 01, 2017)	Disease	Y
ABCA4	NM_000350.2(ABCA4):c.4793C>A (p.Ala1598Asp)	VAR_012581	99321	Stargardt disease 1|not provided	Pathogenic/Likely pathogenic(Last reviewed: Jan 01, 2016)	Disease	Y
ABCA4	NM_000350.2(ABCA4):c.634C>T (p.Arg212Cys)	VAR_008406	7898	Cone-rod dystrophy 3|Stargardt disease 1|not provided	Pathogenic(Last reviewed: Apr 26, 2017)	Disease	Y
ABCA4	NM_000350.2(ABCA4):c.634C>T (p.Arg212Cys)	VAR_008406	7898	Cone-rod dystrophy 3|Stargardt disease 1|not provided	Pathogenic(Last reviewed: Apr 26, 2017)	Disease	Y
ABCA4	NM_000350.2(ABCA4):c.6229C>T (p.Arg2077Trp)	VAR_008482	99438	Retinal dystrophy|Retinitis pigmentosa 19|Stargardt disease 1|not provided	Pathogenic/Likely pathogenic(Last reviewed: Jan 01, 2016)	Disease	Y
ABCA4	NM_000350.2(ABCA4):c.6316C>T (p.Arg2106Cys)	VAR_008484	99447	Stargardt disease 1|not provided	Pathogenic/Likely pathogenic(Last reviewed: Apr 08, 2016)	Disease	Y
ABCA4	NM_000350.2(ABCA4):c.6316C>T (p.Arg2106Cys)	VAR_008484	99447	Stargardt disease 1|not provided	Pathogenic/Likely pathogenic(Last reviewed: Apr 08, 2016)	Disease	Y
ABCA4	NM_000350.2(ABCA4):c.2300T>A (p.Val767Asp)	VAR_012535	99127	Stargardt disease 1|not provided	Pathogenic/Likely pathogenic(Last reviewed: Feb 01, 2016)	Disease	Y
ABCA4	NM_000350.2(ABCA4):c.4469G>A (p.Cys1490Tyr)	VAR_008454	99288	Retinal dystrophy|Stargardt disease 1|not provided	Pathogenic/Likely pathogenic(Last reviewed: Mar 31, 2016)	Disease	Y
ABCA4	NM_000350.2(ABCA4):c.4469G>A (p.Cys1490Tyr)	VAR_008454	99288	Retinal dystrophy|Stargardt disease 1|not provided	Pathogenic/Likely pathogenic(Last reviewed: Mar 31, 2016)	Disease	Y
ABCA4	NM_000350.2(ABCA4):c.4919G>A (p.Arg1640Gln)	VAR_012583	99331	Retinal dystrophy|Stargardt disease 1|not provided	Pathogenic/Likely pathogenic(Last reviewed: Feb 23, 2017)	Disease	Y
ABCA4	NM_000350.2(ABCA4):c.4919G>A (p.Arg1640Gln)	VAR_012583	99331	Retinal dystrophy|Stargardt disease 1|not provided	Pathogenic/Likely pathogenic(Last reviewed: Feb 23, 2017)	Disease	Y
ABCA4	NM_000350.2(ABCA4):c.4919G>A (p.Arg1640Gln)	VAR_012583	99331	Retinal dystrophy|Stargardt disease 1|not provided	Pathogenic/Likely pathogenic(Last reviewed: Feb 23, 2017)	Disease	Y
ABCA4	NM_000350.2(ABCA4):c.6079C>T (p.Leu2027Phe)	VAR_008478	7882	Cone-rod dystrophy 3|Stargardt disease 1|not provided	Pathogenic(Last reviewed: Apr 06, 2017)	Disease	Y
ABCA4	NM_000350.2(ABCA4):c.6079C>T (p.Leu2027Phe)	VAR_008478	7882	Cone-rod dystrophy 3|Stargardt disease 1|not provided	Pathogenic(Last reviewed: Apr 06, 2017)	Disease	Y
ABCA4	NM_000350.2(ABCA4):c.4594G>A (p.Asp1532Asn)	VAR_008457	99304	Stargardt disease 1|not provided	Pathogenic/Likely pathogenic(Last reviewed: Jan 01, 2016)	Disease	Y
ABCA4	NM_000350.2(ABCA4):c.6529G>A (p.Asp2177Asn)	VAR_008491	7885	Cone-Rod Dystrophy, Recessive|MACULAR DEGENERATION, AGE-RELATED, 2, SUSCEPTIBILITY TO|Macular degeneration|Retinitis Pigmentosa, Recessive|Stargardt Disease, Recessive|not provided|not specified	Likely benign, risk factor(Last reviewed: Jun 14, 2016)	Polymorphism	Y
ABCA4	NM_000350.2(ABCA4):c.5603A>T (p.Asn1868Ile)	VAR_008470	99390	Cone-Rod Dystrophy, Recessive|Macular degeneration|Retinitis Pigmentosa, Recessive|Stargardt Disease, Recessive|not provided|not specified	Benign/Likely benign(Last reviewed: Aug 31, 2016)	Polymorphism	Y
ABCA4	NM_000350.2(ABCA4):c.1268A>G (p.His423Arg)	VAR_012517	99040	Cone-Rod Dystrophy, Recessive|Macular degeneration|Retinitis Pigmentosa, Recessive|Stargardt Disease, Recessive|not provided|not specified	Benign/Likely benign(Last reviewed: Oct 26, 2016)	Polymorphism	Y
ABCA4	NM_000350.2(ABCA4):c.5843C>T (p.Pro1948Leu)	VAR_008474	99413	Cone-Rod Dystrophy, Recessive|Macular degeneration|Retinitis Pigmentosa, Recessive|Stargardt Disease, Recessive|not provided|not specified	Benign/Likely benign(Last reviewed: Jun 14, 2016)	Polymorphism	Y
ABCA4	NM_000350.2(ABCA4):c.635G>A (p.Arg212His)	VAR_012507	99454	Cone-Rod Dystrophy, Recessive|Macular degeneration|Retinitis Pigmentosa, Recessive|Stargardt Disease, Recessive|not provided|not specified	Benign/Likely benign(Last reviewed: May 29, 2017)	Polymorphism	Y
ABCA4	NM_000350.2(ABCA4):c.6764G>T (p.Ser2255Ile)	VAR_009157	99494	Cone-Rod Dystrophy, Recessive|Macular degeneration|Retinitis Pigmentosa, Recessive|Stargardt Disease, Recessive|not provided|not specified	Benign/Likely benign(Last reviewed: Jun 15, 2016)	Polymorphism	Y
ABCB1	NM_000927.4(ABCB1):c.1199G>A (p.Ser400Asn)	VAR_015003	194008	not specified	Benign(Last reviewed: Oct 04, 2015)	Polymorphism	Y
ABCB11	NM_003742.2(ABCB11):c.890A>G (p.Glu297Gly)	VAR_010271	6590	Benign recurrent intrahepatic cholestasis 2|Familial Intrahepatic Cholestasis|Progressive familial intrahepatic cholestasis 2	Pathogenic(Last reviewed: Oct 29, 2016)	Disease	Y
ABCB11	NM_003742.2(ABCB11):c.890A>G (p.Glu297Gly)	VAR_010271	6590	Benign recurrent intrahepatic cholestasis 2|Familial Intrahepatic Cholestasis|Progressive familial intrahepatic cholestasis 2	Pathogenic(Last reviewed: Oct 29, 2016)	Disease	Y
ABCB11	NM_003742.2(ABCB11):c.2029A>G (p.Met677Val)	VAR_030393	259145	Familial Intrahepatic Cholestasis|not specified	Benign/Likely benign(Last reviewed: Jun 14, 2016)	Polymorphism	Y
ABCB11	NM_003742.2(ABCB11):c.1772A>G (p.Asn591Ser)	VAR_043075	194505	Familial Intrahepatic Cholestasis|not specified	Benign/Likely benign(Last reviewed: Jul 05, 2016)	Polymorphism	Y
ABCB11	NM_003742.2(ABCB11):c.2594C>T (p.Ala865Val)	VAR_035353	235398	not provided|not specified	Benign/Likely benign(Last reviewed: May 04, 2016)	Polymorphism	Y
ABCB11	NM_003742.2(ABCB11):c.2093G>A (p.Arg698His)	VAR_035352	194842	not provided|not specified	Benign/Likely benign(Last reviewed: Feb 06, 2017)	Polymorphism	Y
ABCB11	NM_003742.2(ABCB11):c.3556G>A (p.Glu1186Lys)	VAR_030398	195964	not provided|not specified	Benign, other(Last reviewed: Jul 12, 2016)	Polymorphism	Y
ABCB11	NM_003742.2(ABCB11):c.1331T>C (p.Val444Ala)	VAR_013333	194214	Familial Intrahepatic Cholestasis|not specified	Benign(Last reviewed: Jun 14, 2016)	Polymorphism	Y
ABCB4	NM_018849.2(ABCB4):c.1529A>G (p.Asn510Ser)	VAR_073752	291252	not provided|not specified	Uncertain significance(Last reviewed: Oct 25, 2016)	Disease	N
ABCB4	NM_000443.3(ABCB4):c.1954A>G (p.Arg652Gly)	VAR_020225	256160	Familial Intrahepatic Cholestasis|Progressive intrahepatic cholestasis|not specified	Benign(Last reviewed: Jul 13, 2016)	Unclassified	N
ABCB4	NM_000443.3(ABCB4):c.1584G>C (p.Glu528Asp)	VAR_043090	194334	not specified	Benign(Last reviewed: Mar 01, 2016)	Unclassified	N
ABCB4	NM_000443.3(ABCB4):c.2363G>A (p.Arg788Gln)	VAR_024359	194921	not specified	Benign(Last reviewed: Feb 19, 2016)	Unclassified	N
ABCB4	NM_000443.3(ABCB4):c.140G>A (p.Arg47Gln)	VAR_073730	197144	ABCB4-Related Intrahepatic Cholestasis|not specified	Uncertain significance(Last reviewed: Jun 14, 2016)	Unclassified	Y
ABCC2	NM_000392.4(ABCC2):c.1249G>A (p.Val417Ile)	VAR_013325	255992	Dubin-Johnson syndrome|not specified	Benign(Last reviewed: Jun 14, 2016)	Polymorphism	Y
ABCC2	NM_000392.4(ABCC2):c.3542G>T (p.Arg1181Leu)	VAR_020231	195851	Dubin-Johnson syndrome|not specified	Benign/Likely benign(Last reviewed: Jun 14, 2016)	Polymorphism	Y
ABCC6	NM_001171.5(ABCC6):c.4081G>A (p.Asp1361Asn)	VAR_013393	419738	Pseudoxanthoma elasticum|not provided	Pathogenic(Last reviewed: Aug 18, 2015)	Disease	Y
ABCC6	NM_001171.5(ABCC6):c.3415G>A (p.Ala1139Thr)	VAR_067894	381636	Pseudoxanthoma elasticum|not provided	Likely pathogenic(Last reviewed: Sep 29, 2016)	Disease	Y
ABCC6	NM_001171.5(ABCC6):c.3398G>C (p.Gly1133Ala)	VAR_067893	265020	Pseudoxanthoma elasticum|not provided	Pathogenic/Likely pathogenic(Last reviewed: Mar 17, 2015)	Disease	Y
ABCC6	NM_001171.5(ABCC6):c.4016G>A (p.Arg1339His)	VAR_067904	265021	Pseudoxanthoma elasticum|not provided	Pathogenic/Likely pathogenic(Last reviewed: Mar 04, 2016)	Disease	Y
ABCC8	NM_000352.4(ABCC8):c.560T>A (p.Val187Asp)	VAR_008641	9099	Persistent hyperinsulinemic hypoglycemia of infancy	Pathogenic(Last reviewed: Feb 19, 2016)	Disease	Y
ABCC8	NM_000352.4(ABCC8):c.4198G>A (p.Gly1400Arg)	VAR_031380	35616	Familial hyperinsulinism|Permanent neonatal diabetes mellitus|Persistent hyperinsulinemic hypoglycemia of infancy	Pathogenic/Likely pathogenic(Last reviewed: Jun 07, 2014)	Disease	Y
ABCC8	NM_000352.4(ABCC8):c.4198G>A (p.Gly1400Arg)	VAR_031380	35616	Familial hyperinsulinism|Permanent neonatal diabetes mellitus|Persistent hyperinsulinemic hypoglycemia of infancy	Pathogenic/Likely pathogenic(Last reviewed: Jun 07, 2014)	Disease	Y
ABCC8	NM_000352.4(ABCC8):c.3545G>A (p.Arg1182Gln)	VAR_029783	35611	Neonatal diabetes mellitus|Transient neonatal diabetes mellitus 2	Pathogenic/Likely pathogenic(Last reviewed: Oct 30, 2014)	Disease	Y
ABCC8	NM_000352.4(ABCC8):c.4628T>C (p.Leu1543Pro)	VAR_015010	188836	Persistent hyperinsulinemic hypoglycemia of infancy	Likely pathogenic(Last reviewed: Nov 09, 2015)	Disease	Y
ABCC8	NM_000352.4(ABCC8):c.331G>A (p.Gly111Arg)	VAR_031355	210074	Persistent hyperinsulinemic hypoglycemia of infancy	Pathogenic/Likely pathogenic(Last reviewed: Jun 07, 2016)	Disease	Y
ABCC8	NM_000352.4(ABCC8):c.563A>G (p.Asn188Ser)	VAR_008642	210082	Persistent hyperinsulinemic hypoglycemia of infancy	Pathogenic/Likely pathogenic(Last reviewed: Aug 23, 2016)	Disease	Y
ABCC8	NM_000352.4(ABCC8):c.1678G>A (p.Val560Met)	VAR_008645	188919	Hyperinsulinism, Dominant/Recessive|Permanent neonatal diabetes mellitus|Persistent hyperinsulinemic hypoglycemia of infancy|Transient Neonatal Diabetes, Dominant	Likely benign(Last reviewed: Jun 14, 2016)	Polymorphism	Y
ABCC8	NM_000352.4(ABCC8):c.4105G>T (p.Ala1369Ser)	VAR_008652	157699	Hyperinsulinism, Dominant/Recessive|Permanent neonatal diabetes mellitus|Transient Neonatal Diabetes, Dominant|not specified	Benign/Likely benign(Last reviewed: Jun 14, 2016)	Polymorphism	Y
ABCC8;KCNJ11	NM_000352.4(ABCC8):c.4714G>A (p.Val1572Ile)	VAR_008658	157705	Hyperinsulinism, Dominant/Recessive|Maturity-onset diabetes of the young|Permanent neonatal diabetes mellitus|Transient Neonatal Diabetes, Dominant|not specified	Benign/Likely benign(Last reviewed: Jun 14, 2016)	Polymorphism	Y
ABCD1	NM_000033.3(ABCD1):c.1816T>C (p.Ser606Pro)	VAR_000080	218422	Adrenoleukodystrophy|not specified	Likely benign(Last reviewed: Jun 14, 2016)	Disease	N
ABCD1	NM_000033.3(ABCD1):c.421G>A (p.Ala141Thr)	VAR_000033	35642	Adrenoleukodystrophy	Pathogenic(Last reviewed: Feb 03, 2014)	Disease	Y
ABCD1	NM_000033.3(ABCD1):c.1771C>T (p.Arg591Trp)	VAR_009382	92321	Adrenoleukodystrophy|not provided	Pathogenic/Likely pathogenic(Last reviewed: Jun 08, 2017)	Disease	Y
ABCD4	NM_005050.3(ABCD4):c.1102G>A (p.Glu368Lys)	VAR_020222	259619	not specified	Benign(Last reviewed: Dec 02, 2015)	Polymorphism	Y
ABCD4	NM_005050.3(ABCD4):c.910G>A (p.Ala304Thr)	VAR_020778	259621	not specified	Benign(Last reviewed: Dec 02, 2015)	Polymorphism	Y
ABCG5;ABCG8	NM_022436.2(ABCG5):c.148C>T (p.Arg50Cys)	VAR_048142	286793	Sitosterolemia|not specified	Benign/Likely benign(Last reviewed: Jun 14, 2016)	Polymorphism	Y
ABCG8	NM_022437.2(ABCG8):c.1720G>A (p.Gly574Arg)	VAR_012264	4968	Sitosterolemia	Pathogenic/Likely pathogenic(Last reviewed: Jun 14, 2016)	Disease	Y
ABCG8	NM_022437.2(ABCG8):c.712G>A (p.Glu238Lys)	VAR_012254	291264	Sitosterolemia|not specified	Uncertain significance(Last reviewed: Sep 21, 2016)	Polymorphism	N
ABCG8	NM_022437.2(ABCG8):c.161A>G (p.Tyr54Cys)	VAR_012251	288558	Sitosterolemia|not specified	Benign(Last reviewed: Jul 13, 2016)	Polymorphism	Y
ABCG8	NM_022437.2(ABCG8):c.1199C>A (p.Thr400Lys)	VAR_012257	198902	Sitosterolemia|not specified	Benign(Last reviewed: Jun 14, 2016)	Polymorphism	Y
ACAD8	NM_014384.2(ACAD8):c.384G>A (p.Met128Ile)	VAR_035071	95585	Deficiency of isobutyryl-CoA dehydrogenase|not provided	Pathogenic/Likely pathogenic(Last reviewed: Mar 07, 2017)	Disease	Y
ACAD9	NM_014049.4(ACAD9):c.1430G>A (p.Arg477Gln)	VAR_033459	136255	Acyl-CoA dehydrogenase family, member 9, deficiency of|not specified	Benign/Likely benign(Last reviewed: Jun 14, 2016)	Polymorphism	Y
ACAD9	NM_014049.4(ACAD9):c.976G>A (p.Ala326Thr)	VAR_071899	136253	Acyl-CoA dehydrogenase family, member 9, deficiency of|Acyl-CoA dehydrogenase family, member 9, deficiency of|not specified	Benign/Likely benign(Last reviewed: Jun 14, 2016)	Unclassified	N
ACADM	NM_000016.5(ACADM):c.799G>A (p.Gly267Arg)	VAR_000323	3588	Medium-chain acyl-coenzyme A dehydrogenase deficiency|not provided	Pathogenic(Last reviewed: Sep 09, 2016)	Disease	Y
ACADM	NM_000016.5(ACADM):c.583G>A (p.Gly195Arg)	VAR_000321	3594	Medium-chain acyl-coenzyme A dehydrogenase deficiency|not provided	Pathogenic/Likely pathogenic(Last reviewed: May 01, 2017)	Disease	Y
ACADM	NM_000016.5(ACADM):c.199T>C (p.Tyr67His)	VAR_013698	3597	Medium-chain acyl-coenzyme A dehydrogenase deficiency|not provided	Pathogenic(Last reviewed: Mar 13, 2017)	Disease	Y
ACADM	NM_000016.5(ACADM):c.734C>T (p.Ser245Leu)	VAR_013699	3598	Medium-chain acyl-coenzyme A dehydrogenase deficiency|not provided	Pathogenic/Likely pathogenic(Last reviewed: Nov 15, 2016)	Disease	Y
ACADM	NM_000016.5(ACADM):c.362C>T (p.Thr121Ile)	VAR_015956	3599	Medium-chain acyl-coenzyme A dehydrogenase deficiency|not provided	Pathogenic(Last reviewed: Mar 10, 2017)	Disease	Y
ACADM	NM_000016.5(ACADM):c.157C>T (p.Arg53Cys)	VAR_000317	92258	Medium-chain acyl-coenzyme A dehydrogenase deficiency|not provided	Pathogenic/Likely pathogenic(Last reviewed: Sep 23, 2016)	Disease	Y
ACADM	NM_000016.5(ACADM):c.233T>C (p.Ile78Thr)	VAR_015954	92261	Medium-chain acyl-coenzyme A dehydrogenase deficiency|not provided	Pathogenic(Last reviewed: Feb 16, 2017)	Disease	Y
ACADS	NM_000017.3(ACADS):c.136C>T (p.Arg46Trp)	VAR_000310	3825	Deficiency of butyryl-CoA dehydrogenase|not provided	Pathogenic/Likely pathogenic(Last reviewed: Jun 30, 2017)	Disease	Y
ACADS	NM_000017.3(ACADS):c.1138C>T (p.Arg380Trp)	VAR_013571	3837	Deficiency of butyryl-CoA dehydrogenase|not provided	Pathogenic/Likely pathogenic(Last reviewed: May 16, 2016)	Disease	Y
ACADS	NM_000017.3(ACADS):c.529T>C (p.Trp177Arg)	VAR_000314	3828	Deficiency of butyryl-CoA dehydrogenase|not provided	Pathogenic/Likely pathogenic(Last reviewed: May 18, 2017)	Disease	Y
ACADS	NM_000017.3(ACADS):c.319C>T (p.Arg107Cys)	VAR_000312	3826	Deficiency of butyryl-CoA dehydrogenase|not provided	Pathogenic(Last reviewed: Feb 03, 2017)	Disease	Y
ACADVL	NM_000018.3(ACADVL):c.1600G>A (p.Glu534Lys)	VAR_010105	21018	Very long chain acyl-CoA dehydrogenase deficiency|not specified	Benign/Likely benign(Last reviewed: Jan 30, 2017)	Disease	N
ACADVL	NM_000018.3(ACADVL):c.1097G>A (p.Arg366His)	VAR_000350	203580	Very long chain acyl-CoA dehydrogenase deficiency|not provided	Pathogenic/Likely pathogenic(Last reviewed: Jun 09, 2016)	Disease	Y
ACADVL	NM_000018.3(ACADVL):c.848T>C (p.Val283Ala)	VAR_000342	21025	Very long chain acyl-CoA dehydrogenase deficiency|not provided|not specified	Pathogenic(Last reviewed: Jun 06, 2017)	Disease	Y
ACADVL	NM_000018.3(ACADVL):c.779C>T (p.Thr260Met)	VAR_000339	21024	Very long chain acyl-CoA dehydrogenase deficiency|not provided	Pathogenic/Likely pathogenic(Last reviewed: Sep 08, 2016)	Disease	Y
ACADVL	NM_000018.3(ACADVL):c.1837C>T (p.Arg613Trp)	VAR_000365	1623	Very long chain acyl-CoA dehydrogenase deficiency|not provided|not specified	Pathogenic/Likely pathogenic(Last reviewed: Jun 27, 2017)	Disease	Y
ACADVL	NM_000018.3(ACADVL):c.1322G>A (p.Gly441Asp)	VAR_000354	21016	Very long chain acyl-CoA dehydrogenase deficiency|not provided|not specified	Pathogenic(Last reviewed: Apr 06, 2017)	Disease	Y
ACADVL	NM_000018.3(ACADVL):c.520G>A (p.Val174Met)	VAR_000334	92286	Very long chain acyl-CoA dehydrogenase deficiency|not provided	Pathogenic/Likely pathogenic(Last reviewed: Jan 19, 2017)	Disease	Y
ACADVL	NM_000018.3(ACADVL):c.1406G>A (p.Arg469Gln)	VAR_000361	92276	Very long chain acyl-CoA dehydrogenase deficiency|not provided	Pathogenic/Likely pathogenic(Last reviewed: Feb 25, 2015)	Disease	Y
ACADVL	NM_000018.3(ACADVL):c.553G>A (p.Gly185Ser)	VAR_000335	203595	Very long chain acyl-CoA dehydrogenase deficiency|not provided	Pathogenic/Likely pathogenic(Last reviewed: Oct 13, 2016)	Disease	Y
ACADVL	NM_000018.3(ACADVL):c.1096C>T (p.Arg366Cys)	VAR_000349	203579	not provided|not specified	Pathogenic(Last reviewed: Feb 08, 2017)	Disease	Y
ACADVL	NM_000018.3(ACADVL):c.128G>A (p.Gly43Asp)	VAR_000330	21015	Very long chain acyl-CoA dehydrogenase deficiency|not specified	Benign/Likely benign(Last reviewed: Jun 14, 2016)	Polymorphism	Y
ACADVL	NM_000018.3(ACADVL):c.49C>T (p.Leu17Phe)	VAR_029286	21022	Very long chain acyl-CoA dehydrogenase deficiency|not provided|not specified	Benign/Likely benign(Last reviewed: Sep 14, 2016)	Polymorphism	Y
ACADVL	NM_000018.3(ACADVL):c.194C>T (p.Pro65Leu)	VAR_048176	38798	Very long chain acyl-CoA dehydrogenase deficiency|not provided|not specified	Benign/Likely benign(Last reviewed: Oct 27, 2016)	Polymorphism	Y
ACAT1	NM_000019.3(ACAT1):c.472A>G (p.Asn158Asp)	VAR_007500	92297	Deficiency of acetyl-CoA acetyltransferase|not provided	Pathogenic(Last reviewed: Oct 03, 2016)	Disease	Y
ACAT1	NM_000019.3(ACAT1):c.13G>C (p.Ala5Pro)	VAR_007496	92295	Deficiency of acetyl-CoA acetyltransferase|not specified	Benign(Last reviewed: Jun 14, 2016)	Polymorphism	Y
ACE	NM_000789.3(ACE):c.3856C>A (p.Arg1286Ser)	VAR_011709	256808	Renal dysplasia|not specified	Benign/Likely benign(Last reviewed: Jun 14, 2016)	Polymorphism	Y
ACOX1	NM_004035.6(ACOX1):c.936C>G (p.Ile312Met)	VAR_021529	259223	Pseudoneonatal adrenoleukodystrophy|not specified	Benign(Last reviewed: Jun 14, 2016)	Polymorphism	Y
ACP5	NM_001111035.2(ACP5):c.598G>A (p.Val200Met)	VAR_020603	257479	not specified	Benign(Last reviewed: Mar 28, 2016)	Polymorphism	Y
ACP5	NM_001111035.2(ACP5):c.442G>A (p.Val148Met)	VAR_020602	257478	not specified	Benign(Last reviewed: Mar 28, 2016)	Polymorphism	Y
ACSF3	NM_174917.4(ACSF3):c.1672C>T (p.Arg558Trp)	VAR_066513	31134	Combined malonic and methylmalonic aciduria|not provided	Pathogenic(Last reviewed: Feb 23, 2017)	Disease	Y
ACTA2	NM_001613.2(ACTA2):c.353G>A (p.Arg118Gln)	VAR_045916	199670	Aortic aneurysm, familial thoracic 6|not provided	Pathogenic(Last reviewed: Jan 03, 2017)	Disease	Y
ACTA2	NM_001613.2(ACTA2):c.445C>T (p.Arg149Cys)	VAR_045918	18276	Aortic aneurysm, familial thoracic 6|Thoracic aortic aneurysm and aortic dissection|not provided	Pathogenic(Last reviewed: Jun 05, 2017)	Disease	Y
ACTA2	NM_001613.2(ACTA2):c.773G>A (p.Arg258His)	VAR_045921	18277	Aortic aneurysm, familial thoracic 6|Moyamoya disease 5|not provided	Pathogenic(Last reviewed: Oct 21, 2016)	Disease	Y
ACTA2	NM_001613.2(ACTA2):c.772C>T (p.Arg258Cys)	VAR_045920	18278	Aortic aneurysm, familial thoracic 6|Moyamoya disease 5|Thoracic aortic aneurysm and aortic dissection	Pathogenic/Likely pathogenic(Last reviewed: May 27, 2016)	Disease	Y
ACTA2	NM_001613.2(ACTA2):c.536G>A (p.Arg179His)	VAR_064516	29598	Aortic aneurysm, familial thoracic 6|Connective tissue disorder|Moyamoya disease 5|Multisystemic smooth muscle dysfunction syndrome|Thoracic aortic aneurysm and aortic dissection|alterations of great arteries and veins|not provided	Pathogenic(Last reviewed: Nov 29, 2016)	Disease	Y
ACTA2	NM_001613.2(ACTA2):c.536G>A (p.Arg179His)	VAR_064516	29598	Aortic aneurysm, familial thoracic 6|Connective tissue disorder|Moyamoya disease 5|Multisystemic smooth muscle dysfunction syndrome|Thoracic aortic aneurysm and aortic dissection|alterations of great arteries and veins|not provided	Pathogenic(Last reviewed: Nov 29, 2016)	Disease	Y
ACTB	NM_001101.4(ACTB):c.587G>A (p.Arg196His)	VAR_067813	29599	Baraitser-Winter syndrome 1|not provided	Pathogenic(Last reviewed: Apr 03, 2017)	Disease	Y
ACTC1	NM_005159.4(ACTC1):c.301G>A (p.Glu101Lys)	VAR_012857	18331	Familial hypertrophic cardiomyopathy 11|Left ventricular noncompaction 4|Primary familial hypertrophic cardiomyopathy|not provided	Pathogenic/Likely pathogenic(Last reviewed: Apr 06, 2017)	Disease	Y
ACTG2	NM_001615.3(ACTG2):c.533G>A (p.Arg178His)	VAR_071287	132801	Inborn genetic diseases|Visceral myopathy	Pathogenic(Last reviewed: May 02, 2015)	Disease	Y
ACTG2	NM_001615.3(ACTG2):c.118C>T (p.Arg40Cys)	VAR_071279	132799	Visceral myopathy|not provided	Pathogenic/Likely pathogenic(Last reviewed: Nov 24, 2015)	Disease	Y
ACTG2	NM_001615.3(ACTG2):c.769C>T (p.Arg257Cys)	VAR_071290	132803	Chronic intestinal pseudoobstruction|Inborn genetic diseases|Megacystis|Visceral myopathy|not provided	Pathogenic(Last reviewed: Nov 04, 2016)	Disease	Y
ACTG2	NM_001615.3(ACTG2):c.532C>T (p.Arg178Cys)	VAR_071286	132800	Visceral myopathy|not provided	Pathogenic(Last reviewed: Apr 26, 2016)	Disease	Y
ACTN2	NM_001103.3(ACTN2):c.1810A>G (p.Met604Val)	VAR_033487	43915	Cardiovascular phenotype|Dilated Cardiomyopathy, Dominant|Dilated cardiomyopathy 1AA|Hypertrophic cardiomyopathy|Primary familial hypertrophic cardiomyopathy|not provided|not specified	Benign/Likely benign(Last reviewed: Jan 18, 2017)	Polymorphism	Y
ACVR1	NM_001105.4(ACVR1):c.44C>G (p.Ala15Gly)	VAR_041392	257465	Progressive myositis ossificans|not specified	Benign/Likely benign(Last reviewed: Jun 14, 2016)	Polymorphism	Y
ACVRL1	NM_000020.2(ACVRL1):c.1232G>A (p.Arg411Gln)	VAR_006213	8243	Hereditary hemorrhagic telangiectasia type 2|Pulmonary arterial hypertension related to hereditary hemorrhagic telangiectasia|not specified	Pathogenic(Last reviewed: Feb 17, 2017)	Disease	Y
ACVRL1	NM_000020.2(ACVRL1):c.1231C>T (p.Arg411Trp)	VAR_026809	8251	Hereditary hemorrhagic telangiectasia type 2|Pulmonary arterial hypertension related to hereditary hemorrhagic telangiectasia|not provided	Pathogenic(Last reviewed: Dec 21, 2016)	Disease	Y
ACVRL1	NM_000020.2(ACVRL1):c.1120C>T (p.Arg374Trp)	VAR_006211	8249	Hereditary hemorrhagic telangiectasia type 2|Pulmonary arterial hypertension related to hereditary hemorrhagic telangiectasia|not provided|not specified	Pathogenic(Last reviewed: Jun 05, 2017)	Disease	Y
ACVRL1	NM_000020.2(ACVRL1):c.1031G>A (p.Cys344Tyr)	VAR_026798	8254	Hereditary hemorrhagic telangiectasia type 2|Pulmonary arterial hypertension related to hereditary hemorrhagic telangiectasia|not specified	Pathogenic(Last reviewed: Dec 13, 2016)	Disease	Y
ACVRL1	NM_000020.2(ACVRL1):c.998G>T (p.Ser333Ile)	VAR_006210	212802	not provided|not specified	Pathogenic(Last reviewed: Jun 22, 2017)	Disease	Y
ADAMTS13	NM_139025.4(ADAMTS13):c.3097G>A (p.Ala1033Thr)	VAR_027134	262441	Upshaw-Schulman syndrome|not specified	Benign/Likely benign(Last reviewed: Jun 14, 2016)	Polymorphism	Y
ADAMTS13	NM_139025.4(ADAMTS13):c.1852C>G (p.Pro618Ala)	VAR_027124	262430	Upshaw-Schulman syndrome|not specified	Benign/Likely benign(Last reviewed: Jun 14, 2016)	Polymorphism	Y
ADAMTS13	NM_139025.4(ADAMTS13):c.19C>T (p.Arg7Trp)	VAR_027109	262432	Upshaw-Schulman syndrome|not specified	Benign/Likely benign(Last reviewed: Jun 14, 2016)	Polymorphism	Y
ADAMTS13	NM_139025.4(ADAMTS13):c.1874G>A (p.Arg625His)	VAR_027125	262431	Upshaw-Schulman syndrome|not specified	Benign/Likely benign(Last reviewed: Jun 14, 2016)	Polymorphism	Y
ADAMTS13	NM_139025.4(ADAMTS13):c.1368G>T (p.Gln456His)	VAR_027162	262426	Upshaw-Schulman syndrome|not specified	Benign/Likely benign(Last reviewed: Jun 14, 2016)	Polymorphism	Y
ADAMTS13	NM_139025.4(ADAMTS13):c.2218G>A (p.Glu740Lys)	VAR_027164	262434	Upshaw-Schulman syndrome|not specified	Benign/Likely benign(Last reviewed: Jun 14, 2016)	Polymorphism	Y
ADAMTS13	NM_139025.4(ADAMTS13):c.2699C>T (p.Ala900Val)	VAR_027129	262437	Upshaw-Schulman syndrome|not specified	Benign/Likely benign(Last reviewed: Jun 14, 2016)	Polymorphism	Y
ADAMTS13	NM_139025.4(ADAMTS13):c.2708C>T (p.Ser903Leu)	VAR_027130	365555	Upshaw-Schulman syndrome	Likely benign(Last reviewed: Aug 16, 2016)	Polymorphism	Y
ADAMTS2	NM_014244.4(ADAMTS2):c.991G>A (p.Glu331Lys)	VAR_047929	353127	Ehlers-Danlos syndrome, type vii, autosomal recessive|not specified	Uncertain significance(Last reviewed: Jun 16, 2017)	Polymorphism	N
ADAMTS2	NM_014244.4(ADAMTS2):c.3529C>T (p.Pro1177Ser)	VAR_020059	353083	Ehlers-Danlos syndrome, type vii, autosomal recessive|not specified	Benign(Last reviewed: Oct 07, 2016)	Polymorphism	Y
ADAMTS2	NM_014244.4(ADAMTS2):c.722G>A (p.Arg241His)	VAR_047928	353136	Ehlers-Danlos syndrome, type vii, autosomal recessive|not specified	Benign/Likely benign(Last reviewed: Oct 06, 2016)	Polymorphism	Y
ADAMTS2	NM_014244.4(ADAMTS2):c.1993G>A (p.Gly665Arg)	VAR_047930	384810	not provided|not specified	Likely benign(Last reviewed: May 30, 2017)	Polymorphism	Y
ADAMTS2	NM_014244.4(ADAMTS2):c.2480G>A (p.Arg827Gln)	VAR_047931	353103	Ehlers-Danlos syndrome, type vii, autosomal recessive|not specified	Benign/Likely benign(Last reviewed: Oct 31, 2016)	Polymorphism	Y
ADAMTS2	NM_014244.4(ADAMTS2):c.733G>A (p.Val245Ile)	VAR_020058	353134	Ehlers-Danlos syndrome, type vii, autosomal recessive|not specified	Benign(Last reviewed: Sep 29, 2016)	Polymorphism	Y
ADAMTSL4	NM_019032.5(ADAMTSL4):c.577G>C (p.Ala193Pro)	VAR_061918	261079	Ectopia lentis|not specified	Benign(Last reviewed: Jun 14, 2016)	Polymorphism	Y
ADAR	NM_001111.4(ADAR):c.1760A>G (p.Tyr587Cys)	VAR_024407	196312	not provided|not specified	Benign/Likely benign(Last reviewed: Sep 04, 2015)	Polymorphism	Y
ADAR	NM_001111.4(ADAR):c.1151A>G (p.Lys384Arg)	VAR_017240	195112	Symmetrical dyschromatosis of extremities|not specified	Benign(Last reviewed: Jun 14, 2016)	Polymorphism	Y
ADCY5	NM_183357.2(ADCY5):c.1252C>T (p.Arg418Trp)	VAR_073778	162090	Dyskinesia, familial, with facial myokymia|not provided	Pathogenic(Last reviewed: Jun 05, 2017)	Disease	Y
ADGRG1	NM_005682.6(ADGRG1):c.1478T>C (p.Met493Thr)	VAR_049457	137495	not specified	Benign/Likely benign(Last reviewed: Feb 20, 2014)	Polymorphism	Y
ADGRG1	NM_005682.6(ADGRG1):c.918A>C (p.Gln306His)	VAR_017911	158640	not specified	Benign(Last reviewed: Feb 08, 2013)	Polymorphism	Y
ADGRG1	NM_005682.6(ADGRG1):c.843C>G (p.Ser281Arg)	VAR_017910	137493	not specified	Benign/Likely benign(Last reviewed: Jun 12, 2014)	Polymorphism	Y
ADGRV1	NM_032119.3(ADGRV1):c.6695A>G (p.Tyr2232Cys)	VAR_026003	46356	not specified	Benign/Likely benign(Last reviewed: Mar 23, 2010)	Polymorphism	Y
ADGRV1	NM_032119.3(ADGRV1):c.10039T>C (p.Phe3347Leu)	VAR_046351	46244	not specified	Benign(Last reviewed: Jun 18, 2014)	Polymorphism	Y
ADGRV1	NM_032119.3(ADGRV1):c.8407G>A (p.Ala2803Thr)	VAR_026008	46389	not specified	Benign/Likely benign(Last reviewed: Apr 12, 2013)	Polymorphism	Y
ADGRV1	NM_032119.3(ADGRV1):c.9650C>T (p.Ala3217Val)	VAR_026009	158655	not provided|not specified	Benign/Likely benign(Last reviewed: Dec 02, 2016)	Polymorphism	Y
ADGRV1	NM_032119.3(ADGRV1):c.3559A>G (p.Ile1187Val)	VAR_046347	46319	not provided|not specified	Benign/Likely benign(Last reviewed: Feb 22, 2017)	Polymorphism	Y
ADGRV1	NM_032119.3(ADGRV1):c.6012G>T (p.Leu2004Phe)	VAR_026002	46346	not specified	Benign/Likely benign(Last reviewed: Apr 25, 2014)	Polymorphism	Y
ADGRV1	NM_032119.3(ADGRV1):c.6289C>T (p.Arg2097Cys)	VAR_046349	46350	not specified	Benign/Likely benign(Last reviewed: Dec 16, 2015)	Polymorphism	Y
ADGRV1	NM_032119.3(ADGRV1):c.8291C>T (p.Ser2764Leu)	VAR_026007	46387	not specified	Benign/Likely benign(Last reviewed: Apr 29, 2014)	Polymorphism	Y
ADGRV1	NM_032119.3(ADGRV1):c.9743G>A (p.Gly3248Asp)	VAR_026010	46407	not specified	Benign/Likely benign(Last reviewed: Jan 08, 2013)	Polymorphism	Y
ADGRV1	NM_032119.3(ADGRV1):c.5780C>T (p.Thr1927Met)	VAR_025998	46339	not provided|not specified	Benign/Likely benign(Last reviewed: Jan 14, 2013)	Polymorphism	Y
ADGRV1	NM_032119.3(ADGRV1):c.7751A>G (p.Asn2584Ser)	VAR_026006	46379	not specified	Benign/Likely benign(Last reviewed: Jun 19, 2009)	Polymorphism	Y
ADGRV1	NM_032119.3(ADGRV1):c.3279G>T (p.Leu1093Phe)	VAR_025997	46313	not specified	Benign/Likely benign(Last reviewed: Jul 21, 2014)	Polymorphism	Y
ADGRV1	NM_032119.3(ADGRV1):c.7034A>G (p.Asn2345Ser)	VAR_026004	46360	not specified	Benign/Likely benign(Last reviewed: Mar 16, 2007)	Polymorphism	Y
ADGRV1	NM_032119.3(ADGRV1):c.10411G>A (p.Glu3471Lys)	VAR_026011	46248	not specified	Benign/Likely benign(Last reviewed: Jan 21, 2015)	Polymorphism	Y
ADGRV1	NM_032119.3(ADGRV1):c.16031A>G (p.Glu5344Gly)	VAR_026012	46282	not specified	Benign/Likely benign(Last reviewed: Mar 06, 2013)	Polymorphism	Y
ADGRV1	NM_032119.3(ADGRV1):c.5747C>T (p.Thr1916Ile)	VAR_046348	158653	not provided|not specified	Benign/Likely benign(Last reviewed: Jun 04, 2015)	Polymorphism	Y
ADGRV1	NM_032119.3(ADGRV1):c.5953A>G (p.Asn1985Asp)	VAR_026000	46344	not specified	Benign/Likely benign(Last reviewed: Apr 25, 2014)	Polymorphism	Y
ADGRV1	NM_032119.3(ADGRV1):c.380T>G (p.Leu127Arg)	VAR_025995	46321	not specified	Benign/Likely benign(Last reviewed: Mar 29, 2013)	Polymorphism	Y
ADGRV1	NM_032119.3(ADGRV1):c.5851G>A (p.Val1951Ile)	VAR_025999	46343	not specified	Benign/Likely benign(Last reviewed: Jun 26, 2014)	Polymorphism	Y
ADGRV1	NM_032119.3(ADGRV1):c.5960C>T (p.Pro1987Leu)	VAR_026001	46345	not specified	Benign/Likely benign(Last reviewed: Jun 22, 2014)	Polymorphism	Y
ADGRV1	NM_032119.3(ADGRV1):c.1652T>C (p.Val551Ala)	VAR_046346	46286	not provided|not specified	Benign/Likely benign(Last reviewed: Aug 26, 2015)	Polymorphism	Y
ADSL	NM_000026.3(ADSL):c.340T>C (p.Tyr114His)	VAR_017080	204807	Adenylosuccinate lyase deficiency|Difficulty standing|Generalized myoclonic seizures|Inability to walk|Progressive neurologic deterioration|Severe global developmental delay|not provided	Pathogenic(Last reviewed: Jun 08, 2016)	Disease	Y
ADSL	NM_000026.3(ADSL):c.421C>T (p.Arg141Trp)	VAR_007973	204815	Difficulty standing|Generalized myoclonic seizures|Inability to walk|Progressive neurologic deterioration|Severe global developmental delay|not provided	Pathogenic(Last reviewed: Jun 22, 2015)	Disease	Y
ADSL	NM_000026.3(ADSL):c.440A>T (p.Lys147Met)	VAR_037884	128278	Adenylosuccinate lyase deficiency|not provided|not specified	Benign/Likely benign(Last reviewed: Jan 13, 2017)	Polymorphism	Y
AGA	NM_000027.3(AGA):c.446C>G (p.Thr149Ser)	VAR_033533	92308	Aspartylglycosaminuria|not specified	Benign(Last reviewed: Jun 14, 2016)	Polymorphism	Y
AGL	NM_000642.2(AGL):c.3619G>A (p.Ala1207Thr)	VAR_051010	256741	not specified	Benign(Last reviewed: Jan 04, 2017)	Polymorphism	Y
AGL	NM_000642.2(AGL):c.3758G>A (p.Arg1253His)	VAR_028054	256743	Glycogen storage disease type III|not specified	Benign/Likely benign(Last reviewed: Dec 28, 2016)	Polymorphism	Y
AGL	NM_000642.2(AGL):c.686A>G (p.Gln229Arg)	VAR_028051	256749	Glycogen storage disease type III|not specified	Benign/Likely benign(Last reviewed: Jun 14, 2016)	Polymorphism	Y
AGL	NM_000642.2(AGL):c.1160G>A (p.Arg387Gln)	VAR_009621	199034	Glycogen storage disease type III|not specified	Benign/Likely benign(Last reviewed: Jun 14, 2016)	Polymorphism	Y
AGL	NM_000642.2(AGL):c.3343G>A (p.Gly1115Arg)	VAR_009230	256738	Glycogen storage disease type III|not specified	Benign/Likely benign(Last reviewed: Jun 14, 2016)	Polymorphism	Y
AGL	NM_000642.2(AGL):c.2885C>G (p.Ser962Cys)	VAR_032085	256732	not specified	Benign(Last reviewed: Mar 09, 2016)	Polymorphism	Y
AGL	NM_000642.2(AGL):c.112A>G (p.Thr38Ala)	VAR_032084	256718	not specified	Benign/Likely benign(Last reviewed: Mar 09, 2016)	Polymorphism	Y
AGL	NM_000642.2(AGL):c.3199C>T (p.Pro1067Ser)	VAR_020389	256734	Glycogen storage disease type III|not specified	Benign/Likely benign(Last reviewed: Jun 14, 2016)	Polymorphism	Y
AGRN	NM_198576.3(AGRN):c.4540G>A (p.Ala1514Thr)	VAR_068738	128309	not provided|not specified	Benign/Likely benign(Last reviewed: Jul 05, 2017)	Polymorphism	Y
AGRN	NM_198576.3(AGRN):c.2183A>T (p.Glu728Val)	VAR_068729	128294	not specified	Benign(Last reviewed: May 26, 2016)	Polymorphism	Y
AGRN	NM_198576.3(AGRN):c.1123G>T (p.Ala375Ser)	VAR_068728	263158	not provided|not specified	Likely benign(Last reviewed: Feb 02, 2017)	Polymorphism	Y
AGRN	NM_198576.3(AGRN):c.5201G>A (p.Arg1734His)	VAR_068743	263195	not specified	Benign/Likely benign(Last reviewed: Oct 13, 2016)	Polymorphism	Y
AGRN	NM_198576.3(AGRN):c.3264G>C (p.Leu1088Phe)	VAR_068732	128298	not provided|not specified	Benign/Likely benign(Last reviewed: Jan 02, 2017)	Polymorphism	Y
AGRN	NM_198576.3(AGRN):c.4996G>A (p.Val1666Ile)	VAR_048966	128312	not specified	Benign/Likely benign(Last reviewed: Jul 15, 2016)	Polymorphism	Y
AGT	NM_000029.3(AGT):c.803T>C (p.Met268Thr)	VAR_007096	18068	Hypertension, essential, susceptibility to|Preeclampsia, susceptibility to|Renal dysplasia|Susceptibility to progression to renal failure in IgA nephropathy|not specified	Benign, risk factor(Last reviewed: Jun 14, 2016)	Polymorphism	Y
AGXT	NM_000030.2(AGXT):c.454T>A (p.Phe152Ile)	VAR_000589	5645	Primary hyperoxaluria, type I	Pathogenic(Last reviewed: May 11, 2016)	Disease	Y
AGXT	NM_000030.2(AGXT):c.508G>A (p.Gly170Arg)	VAR_000590	40166	Primary hyperoxaluria, type I|not provided	Pathogenic/Likely pathogenic(Last reviewed: Sep 08, 2016)	Disease	Y
AHI1	NM_001134831.1(AHI1):c.2168G>A (p.Arg723Gln)	VAR_037894	2015	Joubert syndrome|Joubert syndrome 3	Pathogenic/Likely pathogenic(Last reviewed: Dec 05, 2016)	Disease	Y
AHI1	NM_001134831.1(AHI1):c.2156A>G (p.Asp719Gly)	VAR_076821	217530	Joubert syndrome 3|not provided	Pathogenic/Likely pathogenic(Last reviewed: Feb 10, 2016)	Disease	Y
AHI1	NM_017651.4(AHI1):c.3368C>T (p.Ser1123Phe)	VAR_037900	95756	Joubert syndrome 3|not provided|not specified	Benign/Likely benign(Last reviewed: Sep 15, 2016)	Polymorphism	Y
AHI1	NM_017651.4(AHI1):c.2488C>T (p.Arg830Trp)	VAR_037896	128324	Joubert syndrome|not specified	Benign/Likely benign(Last reviewed: Oct 12, 2016)	Polymorphism	Y
AHI1	NM_017651.4(AHI1):c.1643G>A (p.Arg548His)	VAR_037893	128322	Joubert syndrome|not specified	Benign/Likely benign(Last reviewed: Nov 16, 2016)	Polymorphism	Y
AHI1	NM_017651.4(AHI1):c.3053A>C (p.Gln1018Pro)	VAR_037899	128327	Joubert syndrome|not provided|not specified	Benign/Likely benign(Last reviewed: Jun 14, 2016)	Polymorphism	Y
AIP	NM_003977.3(AIP):c.682C>A (p.Gln228Lys)	VAR_043909	259205	Familial Isolated Pituitary Adenomas|not specified	Benign(Last reviewed: Jun 14, 2016)	Polymorphism	Y
AIPL1	NM_014336.4(AIPL1):c.268G>C (p.Asp90His)	VAR_010140	99794	Leber congenital amaurosis|Retinitis Pigmentosa, Dominant|Retinitis Pigmentosa, Recessive|not provided|not specified	Benign/Likely benign(Last reviewed: Jun 14, 2016)	Polymorphism	Y
AIRE	NM_000383.3(AIRE):c.755C>T (p.Pro252Leu)	VAR_026484	35668	Polyglandular autoimmune syndrome, type 1	Likely benign(Last reviewed: Mar 03, 2014)	Disease	N
AIRE	NM_000383.3(AIRE):c.254A>G (p.Tyr85Cys)	VAR_013718	68222	Polyglandular autoimmune syndrome, type 1|not provided	Pathogenic(Last reviewed: Dec 19, 2015)	Disease	Y
AIRE	NM_000383.3(AIRE):c.1616C>T (p.Pro539Leu)	VAR_026486	68218	Polyglandular autoimmune syndrome, type 1|not provided	Pathogenic/Likely pathogenic(Last reviewed: Feb 25, 2016)	Disease	Y
AIRE	NM_000383.3(AIRE):c.834C>G (p.Ser278Arg)	VAR_005006	128340	not specified	Benign/Likely benign(Last reviewed: Oct 14, 2014)	Polymorphism	Y
AK2	NM_001625.3(AK2):c.625G>A (p.Ala209Thr)	VAR_050032	136327	not provided|not specified	Benign/Likely benign(Last reviewed: Aug 01, 2016)	Polymorphism	Y
ALAS2	NM_000032.4(ALAS2):c.1559C>T (p.Pro520Leu)	VAR_066242	214088	Sideroblastic Anemia and Ataxia|not specified	Likely benign(Last reviewed: Jun 16, 2017)	Disease	N
ALDH18A1	NM_002860.3(ALDH18A1):c.896C>T (p.Thr299Ile)	VAR_051792	258827	Cutis laxa, recessive|not specified	Benign/Likely benign(Last reviewed: Oct 03, 2016)	Disease	N
ALDH18A1	NM_002860.3(ALDH18A1):c.1115C>A (p.Ser372Tyr)	VAR_051793	301770	Cutis laxa, recessive|not specified	Benign/Likely benign(Last reviewed: Dec 08, 2016)	Polymorphism	Y
ALDH3A2	NM_000382.2(ALDH3A2):c.551C>T (p.Thr184Met)	VAR_017514	188768	SjÃ¶gren-Larsson syndrome|not provided	Pathogenic/Likely pathogenic(Last reviewed: Apr 15, 2015)	Disease	Y
ALDH3A2	NM_000382.2(ALDH3A2):c.943C>T (p.Pro315Ser)	VAR_002254	1640	SjÃ¶gren-Larsson syndrome|not provided	Pathogenic(Last reviewed: Oct 04, 2016)	Disease	Y
ALDH5A1	NM_001080.3(ALDH5A1):c.538C>T (p.His180Tyr)	VAR_016758	128343	Succinate-semialdehyde dehydrogenase deficiency|not specified	Benign/Likely benign(Last reviewed: Aug 10, 2016)	Polymorphism	Y
ALDH5A1	NM_001080.3(ALDH5A1):c.545C>T (p.Pro182Leu)	VAR_016759	128344	Succinate-semialdehyde dehydrogenase deficiency|not specified	Benign/Likely benign(Last reviewed: Jun 14, 2016)	Polymorphism	Y
ALDH5A1	NM_001080.3(ALDH5A1):c.106G>C (p.Gly36Arg)	VAR_026227	285783	Succinate-semialdehyde dehydrogenase deficiency|not specified	Benign/Likely benign(Last reviewed: Jun 14, 2016)	Polymorphism	Y
ALDH5A1	NM_170740.1(ALDH5A1):c.709G>T (p.Ala237Ser)	VAR_026228	218854	not specified	Benign(Last reviewed: Oct 21, 2015)	Polymorphism	Y
ALDH7A1	NM_001182.4(ALDH7A1):c.1279G>C (p.Glu427Gln)	VAR_031719	17994	Pyridoxine-dependent epilepsy|not provided	Pathogenic/Likely pathogenic(Last reviewed: Jun 28, 2017)	Disease	Y
ALDH7A1	NM_001182.4(ALDH7A1):c.1315A>C (p.Lys439Gln)	VAR_028203	128346	Pyridoxine-dependent epilepsy|not specified	Benign/Likely benign(Last reviewed: Jun 14, 2016)	Polymorphism	Y
ALDH7A1	NM_001182.4(ALDH7A1):c.1234A>G (p.Thr412Ala)	VAR_028202	128345	Pyridoxine-dependent epilepsy|not specified	Benign/Likely benign(Last reviewed: Dec 20, 2016)	Polymorphism	Y
ALDOA	NM_000034.3(ALDOA):c.1039G>A (p.Gly347Ser)	VAR_044144	318840	HNSHA due to aldolase A deficiency|not specified	Uncertain significance(Last reviewed: Nov 22, 2016)	Disease	N
ALDOB	NM_000035.3(ALDOB):c.448G>C (p.Ala150Pro)	VAR_000553	464	Hereditary fructosuria|not provided	Pathogenic(Last reviewed: Dec 16, 2016)	Disease	Y
ALDOB	NM_000035.3(ALDOB):c.524C>A (p.Ala175Asp)	VAR_000554	465	Hereditary fructosuria|not provided	Pathogenic(Last reviewed: Apr 11, 2016)	Disease	Y
ALDOB	NM_000035.3(ALDOB):c.1005C>G (p.Asn335Lys)	VAR_000557	469	Hereditary fructosuria	Pathogenic(Last reviewed: Mar 08, 2016)	Disease	Y
ALG1	NM_019109.4(ALG1):c.773C>T (p.Ser258Leu)	VAR_023365	4724	Congenital disorder of glycosylation type 1K|Inborn genetic diseases|not provided	Pathogenic/Likely pathogenic(Last reviewed: Feb 09, 2017)	Disease	Y
ALG1	NM_019109.4(ALG1):c.1079C>T (p.Ala360Val)	VAR_077201	95931	Inborn genetic diseases|not provided	Pathogenic/Likely pathogenic(Last reviewed: Oct 08, 2013)	Disease	Y
ALG1	NM_019109.4(ALG1):c.800G>A (p.Ser267Asn)	VAR_038425	166669	not specified	Benign(Last reviewed: Dec 14, 2015)	Polymorphism	Y
ALG1	NM_019109.4(ALG1):c.1287T>A (p.Asp429Glu)	VAR_023367	194258	not specified	Benign(Last reviewed: Jan 20, 2016)	Polymorphism	Y
ALG11	NM_001004127.2(ALG11):c.323A>G (p.Asn108Ser)	VAR_055902	196291	Congenital disorder of glycosylation|not specified	Benign/Likely benign(Last reviewed: Jun 14, 2016)	Polymorphism	Y
ALG12	NM_024105.3(ALG12):c.1177A>G (p.Ile393Val)	VAR_024466	96095	Congenital disorder of glycosylation|not specified	Benign/Likely benign(Last reviewed: Jun 14, 2016)	Polymorphism	Y
ALG2	NM_033087.3(ALG2):c.31T>C (p.Ser11Pro)	VAR_049351	96237	Congenital disorder of glycosylation|not specified	Benign/Likely benign(Last reviewed: Jun 14, 2016)	Polymorphism	Y
ALG2	NM_033087.3(ALG2):c.1100T>C (p.Val367Ala)	VAR_049352	96236	Congenital disorder of glycosylation|not specified	Benign/Likely benign(Last reviewed: Jun 14, 2016)	Polymorphism	Y
ALG6	NM_013339.3(ALG6):c.911C>T (p.Ser304Phe)	VAR_013442	95531	Congenital disorder of glycosylation|not specified	Benign/Likely benign(Last reviewed: Jun 14, 2016)	Polymorphism	Y
ALG8	NM_024079.4(ALG8):c.665A>G (p.Asn222Ser)	VAR_023481	96092	Congenital disorder of glycosylation|not specified	Benign/Likely benign(Last reviewed: Jun 14, 2016)	Polymorphism	Y
ALG9	NM_024740.2(ALG9):c.764C>T (p.Ser255Leu)	VAR_049222	96136	not provided|not specified	Benign/Likely benign(Last reviewed: Apr 06, 2016)	Polymorphism	Y
ALK	NM_004304.4(ALK):c.4381A>G (p.Ile1461Val)	VAR_031042	133472	Neuroblastoma Susceptibility|not specified	Benign(Last reviewed: Jun 14, 2016)	Polymorphism	Y
ALK	NM_004304.4(ALK):c.4472A>G (p.Lys1491Arg)	VAR_031043	133474	Neuroblastoma Susceptibility|not specified	Benign(Last reviewed: Jun 14, 2016)	Polymorphism	Y
ALK	NM_004304.4(ALK):c.4587C>G (p.Asp1529Glu)	VAR_031044	133476	Neuroblastoma Susceptibility|not specified	Benign(Last reviewed: Jun 14, 2016)	Polymorphism	Y
ALK	NM_004304.4(ALK):c.3035C>T (p.Thr1012Met)	VAR_041485	133465	Neuroblastoma 3|Neuroblastoma Susceptibility|not specified	Benign/Likely benign(Last reviewed: Dec 29, 2016)	Polymorphism	Y
ALK	NM_004304.4(ALK):c.1427T>C (p.Val476Ala)	VAR_041480	133485	Neuroblastoma 3|Neuroblastoma Susceptibility|not specified	Benign/Likely benign(Last reviewed: Mar 09, 2017)	Polymorphism	Y
ALK	NM_004304.4(ALK):c.2039C>T (p.Thr680Ile)	VAR_041482	133462	Neuroblastoma 3|Neuroblastoma Susceptibility|not specified	Benign/Likely benign(Last reviewed: Jan 26, 2017)	Polymorphism	Y
ALOX12B	NM_001139.2(ALOX12B):c.1579G>A (p.Val527Met)	VAR_069557	212729	Autosomal recessive congenital ichthyosis 2|not provided	Likely pathogenic(Last reviewed: May 13, 2016)	Disease	Y
ALOX12B	NM_001139.2(ALOX12B):c.1562A>G (p.Tyr521Cys)	VAR_069556	39546	Autosomal recessive congenital ichthyosis 2|Congenital ichthyosiform erythroderma|Ichthyosis|not provided	Pathogenic(Last reviewed: Jun 14, 2016)	Disease	Y
ALPL	NM_000478.5(ALPL):c.455G>A (p.Arg152His)	VAR_013980	197679	Hypophosphatasia|not provided|not specified	Benign/Likely benign(Last reviewed: Jun 14, 2016)	Disease	N
ALPL	NM_000478.5(ALPL):c.571G>A (p.Glu191Lys)	VAR_006158	13670	Adult hypophosphatasia|Childhood hypophosphatasia|Hypophosphatasia|Infantile hypophosphatasia|not provided	Pathogenic/Likely pathogenic(Last reviewed: May 06, 2016)	Disease	Y
ALPL	NM_000478.5(ALPL):c.1133A>T (p.Asp378Val)	VAR_006167	13671	Adult hypophosphatasia|Hypophosphatasia|Infantile hypophosphatasia|not provided	Pathogenic(Last reviewed: Feb 04, 2016)	Disease	Y
ALPL	NM_000478.5(ALPL):c.1001G>A (p.Gly334Asp)	VAR_006166	13672	Hypophosphatasia|Infantile hypophosphatasia|not provided	Pathogenic/Likely pathogenic(Last reviewed: Nov 04, 2016)	Disease	Y
ALPL	NM_000478.5(ALPL):c.979T>C (p.Phe327Leu)	VAR_006165	13673	Adult hypophosphatasia|Hypophosphatasia|Infantile hypophosphatasia	Pathogenic/Likely pathogenic(Last reviewed: Jun 28, 2016)	Disease	Y
ALPL	NM_000478.5(ALPL):c.979T>C (p.Phe327Leu)	VAR_006165	13673	Adult hypophosphatasia|Hypophosphatasia|Infantile hypophosphatasia	Pathogenic/Likely pathogenic(Last reviewed: Jun 28, 2016)	Disease	Y
ALPL	NM_000478.5(ALPL):c.407G>A (p.Arg136His)	VAR_006152	13675	Childhood hypophosphatasia|Hypophosphatasia|Infantile hypophosphatasia	Pathogenic/Likely pathogenic(Last reviewed: Jun 14, 2016)	Disease	Y
ALPL	NM_000478.5(ALPL):c.346G>A (p.Ala116Thr)	VAR_013977	13677	Adult hypophosphatasia|Childhood hypophosphatasia|Infantile hypophosphatasia|Odontohypophosphatasia|not provided	Pathogenic/Likely pathogenic(Last reviewed: Jul 27, 2016)	Disease	Y
ALPL	NM_000478.5(ALPL):c.1250A>G (p.Asn417Ser)	VAR_025937	13679	Adult hypophosphatasia|Hypophosphatasia, perinatal lethal|Infantile hypophosphatasia	Pathogenic/Likely pathogenic(Last reviewed: Jul 16, 2015)	Disease	Y
ALPL	NM_000478.5(ALPL):c.787T>C (p.Tyr263His)	VAR_006161	198423	Hypophosphatasia|not specified	Benign(Last reviewed: Jun 14, 2016)	Polymorphism	Y
ALPL	NM_000478.5(ALPL):c.1565T>C (p.Val522Ala)	VAR_011094	193996	Hypophosphatasia|not specified	Benign/Likely benign(Last reviewed: Jun 14, 2016)	Polymorphism	Y
ALS2	NM_020919.3(ALS2):c.280A>G (p.Ile94Val)	VAR_036747	261370	ALS2-Related Spectrum Disorders|Amyotrophic Lateral Sclerosis, Recessive|Infantile-onset ascending hereditary spastic paralysis|not specified	Benign/Likely benign(Last reviewed: Jan 12, 2017)	Polymorphism	Y
ALS2	NM_020919.3(ALS2):c.475G>A (p.Glu159Lys)	VAR_036748	241312	Amyotrophic Lateral Sclerosis, Recessive|Infantile-onset ascending hereditary spastic paralysis|not specified	Benign/Likely benign(Last reviewed: Feb 02, 2017)	Polymorphism	Y
ALS2	NM_020919.3(ALS2):c.1102G>A (p.Val368Met)	VAR_015656	261364	ALS2-Related Spectrum Disorders|Amyotrophic Lateral Sclerosis, Recessive|not specified	Benign(Last reviewed: Jun 14, 2016)	Polymorphism	Y
AMACR	NM_014324.5(AMACR):c.524G>A (p.Gly175Asp)	VAR_010662	128357	Alpha-methylacyl-CoA racemase deficiency|not specified	Benign/Likely benign(Last reviewed: Jun 14, 2016)	Polymorphism	Y
AMACR	NM_014324.5(AMACR):c.353G>A (p.Arg118Gln)	VAR_055616	353255	Alpha-methylacyl-CoA racemase deficiency|not specified	Benign/Likely benign(Last reviewed: Jun 14, 2016)	Polymorphism	Y
AMACR	NM_014324.5(AMACR):c.602T>C (p.Leu201Ser)	VAR_010663	128358	Alpha-methylacyl-CoA racemase deficiency|not specified	Benign/Likely benign(Last reviewed: Jun 14, 2016)	Polymorphism	Y
AMACR	NM_014324.5(AMACR):c.25G>A (p.Val9Met)	VAR_010660	128356	Alpha-methylacyl-CoA racemase deficiency|not specified	Benign/Likely benign(Last reviewed: Jun 14, 2016)	Polymorphism	Y
AMACR	NM_014324.5(AMACR):c.782T>C (p.Met261Thr)	VAR_055620	235412	Alpha-methylacyl-CoA racemase deficiency|not provided|not specified	Benign/Likely benign(Last reviewed: Jun 14, 2016)	Polymorphism	Y
AMACR	NM_014324.5(AMACR):c.717G>T (p.Gln239His)	VAR_055618	128359	Alpha-methylacyl-CoA racemase deficiency|not specified	Benign/Likely benign(Last reviewed: Jun 14, 2016)	Polymorphism	Y
AMACR	NM_014324.5(AMACR):c.712C>T (p.Pro238Ser)	VAR_055617	353254	Alpha-methylacyl-CoA racemase deficiency|not specified	Benign/Likely benign(Last reviewed: Jun 14, 2016)	Polymorphism	Y
AMACR;C1QTNF3-AMACR;SLC45A2	NM_014324.5(AMACR):c.829G>A (p.Glu277Lys)	VAR_010664	128360	Alpha-methylacyl-CoA racemase deficiency|Oculocutaneous albinism|not specified	Benign/Likely benign(Last reviewed: Jun 14, 2016)	Polymorphism	Y
AMH	NM_000479.4(AMH):c.974A>G (p.Gln325Arg)	VAR_007491	381531	not specified	Benign/Likely benign(Last reviewed: Jul 14, 2016)	Polymorphism	Y
ANK1	NM_020476.2(ANK1):c.3973A>G (p.Met1325Val)	VAR_028772	261307	Spherocytosis, Dominant|not specified	Benign/Likely benign(Last reviewed: Jun 14, 2016)	Polymorphism	Y
ANK1	NM_020476.2(ANK1):c.1856G>A (p.Arg619His)	VAR_000597	261296	Spherocytosis, Dominant|not specified	Benign/Likely benign(Last reviewed: Apr 17, 2017)	Polymorphism	Y
ANK1	NM_000037.3(ANK1):c.2495G>A (p.Arg832Gln)	VAR_061012	235569	Spherocytosis, Dominant|not provided	Likely benign(Last reviewed: Jun 14, 2016)	Polymorphism	Y
ANK1	NM_020476.2(ANK1):c.3224C>T (p.Thr1075Ile)	VAR_048263	261305	Spherocytosis, Dominant|not specified	Benign/Likely benign(Last reviewed: Jun 14, 2016)	Polymorphism	Y
ANK2	NM_001148.4(ANK2):c.7106T>C (p.Val2369Ala)	VAR_055505	35690	Cardiac arrhythmia|Cardiovascular phenotype|Long QT syndrome|not specified	Benign/Likely benign(Last reviewed: Jun 14, 2016)	Polymorphism	Y
ANKRD1	NM_014391.2(ANKRD1):c.347C>T (p.Thr116Met)	VAR_047112	228439	Cardiovascular phenotype|not specified	Uncertain significance(Last reviewed: Sep 09, 2015)	Disease	N
ANKRD26	NM_014915.2(ANKRD26):c.1273A>G (p.Ile425Val)	VAR_055513	260457	Thrombocytopenia|not specified	Benign/Likely benign(Last reviewed: Jun 14, 2016)	Polymorphism	Y
ANKRD26	NM_014915.2(ANKRD26):c.59A>G (p.Gln20Arg)	VAR_026833	260472	Thrombocytopenia|not specified	Benign/Likely benign(Last reviewed: Jun 14, 2016)	Polymorphism	Y
ANO10	NM_018075.4(ANO10):c.1385G>A (p.Arg462Gln)	VAR_032638	128387	Spinocerebellar Ataxia, Recessive|not specified	Benign/Likely benign(Last reviewed: Jun 14, 2016)	Polymorphism	Y
ANO5	NM_213599.2(ANO5):c.692G>T (p.Gly231Val)	VAR_063582	2165	ANO5-Related Disorders|Limb-girdle muscular dystrophy, type 2L|Miyoshi muscular dystrophy 3|not provided	Pathogenic(Last reviewed: Jun 29, 2017)	Disease	Y
ANO5	NM_213599.2(ANO5):c.2272C>T (p.Arg758Cys)	VAR_063583	2166	Limb-girdle muscular dystrophy, type 2L|Miyoshi muscular dystrophy 3|not provided	Pathogenic(Last reviewed: Jun 17, 2016)	Disease	Y
ANO5	NM_213599.2(ANO5):c.2646C>G (p.Asn882Lys)	VAR_052340	128390	not provided|not specified	Benign/Likely benign(Last reviewed: Jun 14, 2016)	Polymorphism	Y
ANO5	NM_213599.2(ANO5):c.966A>T (p.Leu322Phe)	VAR_052339	96687	Limb-Girdle Muscular Dystrophy, Recessive|Miyoshi myopathy|not provided|not specified	Benign/Likely benign(Last reviewed: Jun 14, 2016)	Polymorphism	Y
ANO5	NM_213599.2(ANO5):c.172C>T (p.Arg58Trp)	VAR_068247	197402	Limb-girdle muscular dystrophy, type 2L|Miyoshi muscular dystrophy 3|not provided	Pathogenic/Likely pathogenic(Last reviewed: May 11, 2016)	Unclassified	N
AP3B1	NM_003664.4(AP3B1):c.1754T>A (p.Val585Glu)	VAR_058404	162753	Hermansky-Pudlak syndrome|not specified	Benign(Last reviewed: Jun 14, 2016)	Polymorphism	Y
AP4E1	NM_007347.4(AP4E1):c.1276A>C (p.Ile426Leu)	VAR_076628	432244	not specified	Uncertain significance(Last reviewed: Mar 09, 2017)	Polymorphism	N
AP4E1	NM_007347.4(AP4E1):c.613C>A (p.His205Asn)	VAR_076622	128402	Spastic paraplegia|not provided	Uncertain significance(Last reviewed: Aug 24, 2016)	Unclassified	Y
APC	NM_000038.5(APC):c.7862C>G (p.Ser2621Cys)	VAR_005056	41516	APC-Associated Polyposis Disorders|Familial adenomatous polyposis 1|Hereditary cancer-predisposing syndrome|not provided|not specified	Benign/Likely benign(Last reviewed: Jan 29, 2017)	Disease	N
APC	NM_000038.5(APC):c.3875C>T (p.Thr1292Met)	VAR_005047	133519	Familial adenomatous polyposis 1|Hereditary cancer-predisposing syndrome|not specified	Uncertain significance(Last reviewed: Jan 10, 2017)	Polymorphism	N
APC	NM_000038.5(APC):c.3511C>T (p.Arg1171Cys)	VAR_008992	133518	Familial adenomatous polyposis 1|Familial multiple polyposis syndrome|Hereditary cancer-predisposing syndrome|not specified	Benign/Likely benign(Last reviewed: Mar 19, 2017)	Polymorphism	Y
APC	NM_000038.5(APC):c.7504G>A (p.Gly2502Ser)	VAR_005055	41514	APC-Associated Polyposis Disorders|Familial adenomatous polyposis 1|Familial multiple polyposis syndrome|Hereditary cancer-predisposing syndrome|not provided|not specified	Benign/Likely benign(Last reviewed: Jan 30, 2017)	Polymorphism	Y
APC	NM_000038.5(APC):c.2608C>T (p.Pro870Ser)	VAR_053976	41500	APC-Associated Polyposis Disorders|Familial adenomatous polyposis 1|Hereditary cancer-predisposing syndrome|not provided|not specified	Benign/Likely benign(Last reviewed: May 22, 2017)	Polymorphism	Y
APC	NM_000038.5(APC):c.5465T>A (p.Val1822Asp)	VAR_008993	21030	APC-Associated Polyposis Disorders|Familial adenomatous polyposis 1|Familial colorectal cancer|Hereditary cancer-predisposing syndrome|not provided|not specified	Benign, other(Last reviewed: Jan 27, 2017)	Polymorphism	Y
APOB	NM_000384.2(APOB):c.11761G>A (p.Val3921Ile)	VAR_005027	402379	Familial hypercholesterolemia|not specified	Uncertain significance(Last reviewed: Jun 23, 2016)	Polymorphism	N
APOB	NM_000384.2(APOB):c.307T>C (p.Tyr103His)	VAR_022036	391716	Familial hypercholesterolemia|not specified	Uncertain significance(Last reviewed: Dec 29, 2016)	Polymorphism	N
APOB	NM_000384.2(APOB):c.10294C>G (p.Gln3432Glu)	VAR_005024	180279	Familial hypercholesterolemia|Hypercholesterolemia, autosomal dominant, type B|Hypobetalipoproteinemia, familial, 1|not provided|not specified	Benign/Likely benign(Last reviewed: Aug 22, 2017)	Polymorphism	Y
APOB	NM_000384.2(APOB):c.12541G>A (p.Glu4181Lys)	VAR_016187	128417	Familial hypercholesterolemia|Familial hypobetalipoproteinemia|not specified	Benign/Likely benign(Last reviewed: Oct 18, 2016)	Polymorphism	Y
APOB	NM_000384.2(APOB):c.13013G>A (p.Ser4338Asn)	VAR_005030	128418	Familial hypercholesterolemia|Familial hypobetalipoproteinemia|not specified	Benign/Likely benign(Last reviewed: Sep 30, 2016)	Polymorphism	Y
APOB	NM_000384.2(APOB):c.4163G>A (p.Arg1388His)	VAR_029345	334146	Familial hypercholesterolemia|Familial hypobetalipoproteinemia|Hypercholesterolemia, autosomal dominant, type B|Hypobetalipoproteinemia, familial, 1	Benign/Likely benign(Last reviewed: Nov 30, 2016)	Polymorphism	Y
APOB	NM_000384.2(APOB):c.293C>T (p.Thr98Ile)	VAR_016184	128422	Familial hypercholesterolemia|Familial hypobetalipoproteinemia|not specified	Benign/Likely benign(Last reviewed: Oct 27, 2016)	Polymorphism	Y
APOB	NM_000384.2(APOB):c.5741A>G (p.Asn1914Ser)	VAR_005017	218447	Familial hypercholesterolemia|Hypercholesterolemia, autosomal dominant, type B|Hypobetalipoproteinemia, familial, 1|not specified	Benign/Likely benign(Last reviewed: Dec 09, 2016)	Polymorphism	Y
APOB	NM_000384.2(APOB):c.10913G>A (p.Arg3638Gln)	VAR_016186	128416	Familial hypercholesterolemia|Familial hypobetalipoproteinemia|not specified	Benign/Likely benign(Last reviewed: Nov 09, 2016)	Polymorphism	Y
APOB	NM_000384.2(APOB):c.8216C>T (p.Pro2739Leu)	VAR_005020	128426	Familial hypercholesterolemia|Familial hypobetalipoproteinemia|not specified	Benign/Likely benign(Last reviewed: Oct 27, 2016)	Polymorphism	Y
APOB	NM_000384.2(APOB):c.1853C>T (p.Ala618Val)	VAR_019828	128420	Familial hypercholesterolemia|Familial hypobetalipoproteinemia|not specified	Benign/Likely benign(Last reviewed: Oct 18, 2016)	Polymorphism	Y
APOPT1	NM_032374.4(APOPT1):c.263A>G (p.Asn88Ser)	VAR_033745	235497	not provided|not specified	Likely benign(Last reviewed: Apr 25, 2017)	Polymorphism	Y
ARFGEF2	NM_006420.2(ARFGEF2):c.625G>A (p.Glu209Lys)	VAR_037438	5050	Heterotopia, periventricular, autosomal recessive|not specified	Uncertain significance(Last reviewed: Jan 19, 2017)	Unclassified	Y
ARHGAP31	NM_020754.3(ARHGAP31):c.2407G>A (p.Gly803Ser)	VAR_039123	342658	Adams-Oliver syndrome|not specified	Benign(Last reviewed: Jun 14, 2016)	Polymorphism	Y
ARHGAP31	NM_020754.3(ARHGAP31):c.4096G>A (p.Val1366Met)	VAR_039125	285086	Adams-Oliver syndrome|not specified	Benign/Likely benign(Last reviewed: Jun 14, 2016)	Polymorphism	Y
ARHGAP31	NM_020754.3(ARHGAP31):c.662C>T (p.Pro221Leu)	VAR_039122	342634	Adams-Oliver syndrome|not provided	Likely benign(Last reviewed: Jan 12, 2017)	Polymorphism	Y
ARID1B	NM_020732.3(ARID1B):c.736G>A (p.Gly246Ser)	VAR_067665	210310	not provided|not specified	Benign(Last reviewed: Feb 06, 2017)	Polymorphism	Y
ARL13B	NM_182896.2(ARL13B):c.1043C>G (p.Thr348Ser)	VAR_048319	128452	Joubert syndrome|not specified	Benign/Likely benign(Last reviewed: Jun 14, 2016)	Polymorphism	Y
ARSB	NM_000046.3(ARSB):c.1151G>A (p.Ser384Asn)	VAR_019030	92352	Mucopolysaccharidosis type VI|not specified	Benign/Likely benign(Last reviewed: Jun 14, 2016)	Disease	N
ARSB	NM_000046.3(ARSB):c.1072G>A (p.Val358Met)	VAR_016061	92350	Mucopolysaccharidosis type VI|not specified	Benign(Last reviewed: Jun 14, 2016)	Polymorphism	Y
ARSB	NM_000046.3(ARSB):c.1126G>A (p.Val376Met)	VAR_007303	92351	Mucopolysaccharidosis type VI|not specified	Benign/Likely benign(Last reviewed: Jun 15, 2016)	Polymorphism	Y
ARSE	NM_000047.2(ARSE):c.548G>A (p.Arg183His)	VAR_037974	157734	not provided|not specified	Benign(Last reviewed: Dec 12, 2016)	Polymorphism	Y
ARSE	NM_000047.2(ARSE):c.1270G>A (p.Gly424Ser)	VAR_037975	157728	not provided|not specified	Benign(Last reviewed: Jul 25, 2015)	Polymorphism	Y
ASAH1	NM_004315.5(ASAH1):c.262G>A (p.Val88Met)	VAR_057980	362383	Farber's lipogranulomatosis|not specified	Benign(Last reviewed: Jun 14, 2016)	Polymorphism	Y
ASAH1	NM_177924.4(ASAH1):c.1105G>A (p.Val369Ile)	VAR_021587	362373	Farber's lipogranulomatosis|not provided	Benign/Likely benign(Last reviewed: Dec 30, 2016)	Polymorphism	Y
ASL	NM_001024943.1(ASL):c.1153C>T (p.Arg385Cys)	VAR_017574	2401	Argininosuccinate lyase deficiency	Pathogenic/Likely pathogenic(Last reviewed: Jul 15, 2016)	Disease	Y
ASL	NM_000048.3(ASL):c.857A>G (p.Gln286Arg)	VAR_000679	2399	Argininosuccinate lyase deficiency|not provided	Pathogenic(Last reviewed: Jan 12, 2017)	Disease	Y
ASPA	NM_000049.2(ASPA):c.854A>C (p.Glu285Ala)	VAR_004999	2605	Spongy degeneration of central nervous system|not provided	Pathogenic(Last reviewed: Dec 19, 2016)	Disease	Y
ASPA	NM_000049.2(ASPA):c.914C>A (p.Ala305Glu)	VAR_005001	2607	Spongy degeneration of central nervous system|not provided	Pathogenic(Last reviewed: Apr 07, 2017)	Disease	Y
ASPA	NM_000049.2(ASPA):c.79G>A (p.Gly27Arg)	VAR_039080	188888	Spongy degeneration of central nervous system|not provided	Pathogenic/Likely pathogenic(Last reviewed: Apr 07, 2017)	Disease	Y
ASPM	NM_018136.4(ASPM):c.7860G>C (p.Gln2620His)	VAR_046761	21609	Primary Microcephaly, Recessive|Primary autosomal recessive microcephaly 5|not specified	Benign/Likely benign(Last reviewed: Jun 14, 2016)	Polymorphism	Y
ASPM	NM_018136.4(ASPM):c.3269C>T (p.Ser1090Phe)	VAR_046759	21575	Primary Microcephaly, Recessive|Primary autosomal recessive microcephaly 5|not specified	Benign/Likely benign(Last reviewed: Jun 14, 2016)	Polymorphism	Y
ASPM	NM_018136.4(ASPM):c.9395T>G (p.Leu3132Arg)	VAR_019086	21625	Primary Microcephaly, Recessive|Primary autosomal recessive microcephaly 5|not specified	Benign/Likely benign(Last reviewed: Jun 14, 2016)	Polymorphism	Y
ASPM	NM_018136.4(ASPM):c.7939C>A (p.Leu2647Ile)	VAR_019085	21611	Primary Microcephaly, Recessive|Primary autosomal recessive microcephaly 5|not specified	Benign(Last reviewed: Jun 14, 2016)	Polymorphism	Y
ASPM	NM_018136.4(ASPM):c.7684A>G (p.Ser2562Gly)	VAR_019084	21605	Primary Microcephaly, Recessive|Primary autosomal recessive microcephaly 5|not specified	Benign(Last reviewed: Jun 14, 2016)	Polymorphism	Y
ASPM	NM_018136.4(ASPM):c.1288A>G (p.Arg430Gly)	VAR_024369	21553	Primary Microcephaly, Recessive|Primary autosomal recessive microcephaly 5|not provided|not specified	Benign/Likely benign(Last reviewed: Apr 19, 2017)	Polymorphism	Y
ASPM	NM_018136.4(ASPM):c.9773A>G (p.His3258Arg)	VAR_046762	21638	Primary autosomal recessive microcephaly 5|not provided|not specified	Benign/Likely benign(Last reviewed: Apr 19, 2017)	Polymorphism	Y
ASPM	NM_018136.4(ASPM):c.7480T>C (p.Tyr2494His)	VAR_046760	21599	Primary Microcephaly, Recessive|Primary autosomal recessive microcephaly 5|not specified	Benign(Last reviewed: Jun 14, 2016)	Polymorphism	Y
ASS1	NM_000050.4(ASS1):c.539G>A (p.Ser180Asn)	VAR_000686	6326	Citrullinemia type I|not provided	Pathogenic/Likely pathogenic(Last reviewed: Jun 14, 2016)	Disease	Y
ASS1	NM_000050.4(ASS1):c.970G>A (p.Gly324Ser)	VAR_000691	6327	Citrullinemia type I	Pathogenic/Likely pathogenic(Last reviewed: Jan 17, 2016)	Disease	Y
ASS1	NM_000050.4(ASS1):c.1087C>T (p.Arg363Trp)	VAR_000693	6328	Citrullinemia type I|not provided|not specified	Pathogenic/Likely pathogenic(Last reviewed: Nov 22, 2016)	Disease	Y
ASS1	NM_000050.4(ASS1):c.1168G>A (p.Gly390Arg)	VAR_000694	6329	Citrullinemia type I|not provided	Pathogenic(Last reviewed: May 18, 2017)	Disease	Y
ASS1	NM_000050.4(ASS1):c.787G>A (p.Val263Met)	VAR_058348	92372	Citrullinemia type I|not provided	Pathogenic(Last reviewed: May 18, 2017)	Disease	Y
ASS1	NM_000050.4(ASS1):c.836G>A (p.Arg279Gln)	VAR_016008	92375	Citrullinemia type I	Pathogenic/Likely pathogenic(Last reviewed: Jun 01, 2016)	Disease	Y
ASS1	NM_000050.4(ASS1):c.794G>A (p.Arg265His)	VAR_015900	92374	Citrullinemia type I	Pathogenic/Likely pathogenic(Last reviewed: Sep 01, 2016)	Disease	Y
ATL1	NM_015915.4(ATL1):c.715C>T (p.Arg239Cys)	VAR_017147	4346	Spastic paraplegia 3|not provided	Pathogenic(Last reviewed: Apr 19, 2017)	Disease	Y
ATL1	NM_015915.4(ATL1):c.1243C>T (p.Arg415Trp)	VAR_065512	4352	Inborn genetic diseases|Spastic paraplegia 3	Pathogenic/Likely pathogenic(Last reviewed: Aug 31, 2016)	Disease	Y
ATL1	NM_015915.4(ATL1):c.1483C>T (p.Arg495Trp)	VAR_067660	219827	Spastic paraplegia 3|not provided	Pathogenic(Last reviewed: Aug 05, 2016)	Disease	Y
ATL1	NM_015915.4(ATL1):c.757G>A (p.Val253Ile)	VAR_067657	220424	Spastic paraplegia 3|not provided	Pathogenic/Likely pathogenic(Last reviewed: Aug 24, 2016)	Disease	Y
ATM	NM_000051.3(ATM):c.670A>G (p.Lys224Glu)	VAR_010801	142522	Ataxia-telangiectasia syndrome|Hereditary cancer-predisposing syndrome|not specified	Uncertain significance(Last reviewed: Dec 28, 2016)	Disease	N
ATM	NM_000051.3(ATM):c.7271T>G (p.Val2424Gly)	VAR_010854	3023	Ataxia-telangiectasia syndrome|Ataxia-telangiectasia syndrome|Ataxia-telangiectasia variant|Breast cancer, susceptibility to|Familial cancer of breast|Hereditary cancer-predisposing syndrome|Neoplasm of the breast|T-cell prolymphocytic leukemia|not provided|not specified	Pathogenic/Likely pathogenic, risk factor(Last reviewed: Jun 02, 2017)	Disease	Y
ATM	NM_000051.3(ATM):c.6679C>T (p.Arg2227Cys)	VAR_010846	181981	Ataxia-telangiectasia syndrome|Hereditary cancer-predisposing syndrome|not provided	Pathogenic(Last reviewed: Jan 23, 2017)	Disease	Y
ATM	NM_000051.3(ATM):c.8494C>T (p.Arg2832Cys)	VAR_010881	127459	Ataxia-telangiectasia syndrome|Hereditary cancer-predisposing syndrome|not provided	Pathogenic/Likely pathogenic(Last reviewed: Dec 19, 2016)	Disease	Y
ATM	NM_000051.3(ATM):c.6047A>G (p.Asp2016Gly)	VAR_010838	140823	Ataxia-telangiectasia syndrome|Hereditary cancer-predisposing syndrome	Likely pathogenic(Last reviewed: Jul 05, 2016)	Disease	Y
ATM	NM_000051.3(ATM):c.9022C>T (p.Arg3008Cys)	VAR_010893	142187	Ataxia-telangiectasia syndrome|Hereditary cancer-predisposing syndrome|not provided	Pathogenic/Likely pathogenic(Last reviewed: May 03, 2017)	Disease	Y
ATM	NM_000051.3(ATM):c.8711A>G (p.Glu2904Gly)	VAR_010889	186276	Ataxia-telangiectasia syndrome|Hereditary cancer-predisposing syndrome	Likely pathogenic(Last reviewed: Feb 01, 2016)	Disease	Y
ATM	NM_000051.3(ATM):c.2849T>G (p.Leu950Arg)	VAR_010815	186574	Hereditary cancer-predisposing syndrome|not provided	Likely pathogenic(Last reviewed: Aug 09, 2016)	Disease	Y
ATM	NM_000051.3(ATM):c.4279G>A (p.Ala1427Thr)	VAR_056685	141884	Ataxia-telangiectasia syndrome|Hereditary cancer-predisposing syndrome|not specified	Uncertain significance(Last reviewed: Dec 22, 2016)	Polymorphism	N
ATM	NM_000051.3(ATM):c.2281A>T (p.Thr761Ser)	VAR_056679	135744	Ataxia-telangiectasia syndrome|Hereditary cancer-predisposing syndrome|not specified	Uncertain significance(Last reviewed: Jan 18, 2017)	Polymorphism	N
ATM	NM_000051.3(ATM):c.6101G>A (p.Arg2034Gln)	VAR_056688	127418	Ataxia-telangiectasia syndrome|Hereditary cancer-predisposing syndrome|not specified	Uncertain significance(Last reviewed: Jun 05, 2017)	Polymorphism	N
ATM	NM_000051.3(ATM):c.133C>T (p.Arg45Trp)	VAR_056678	140832	Ataxia-telangiectasia syndrome|Hereditary cancer-predisposing syndrome|not specified	Uncertain significance(Last reviewed: Jun 22, 2017)	Polymorphism	N
ATM	NM_000051.3(ATM):c.2824C>T (p.Leu942Phe)	VAR_056683	187342	Hereditary cancer-predisposing syndrome|not specified	Uncertain significance(Last reviewed: Sep 24, 2015)	Polymorphism	N
ATM	NM_000051.3(ATM):c.2804C>T (p.Thr935Met)	VAR_056682	142503	Ataxia-telangiectasia syndrome|Hereditary cancer-predisposing syndrome|not specified	Uncertain significance(Last reviewed: Jun 10, 2017)	Polymorphism	N
ATM	NM_000051.3(ATM):c.7919C>T (p.Thr2640Ile)	VAR_056691	133634	Ataxia-telangiectasia syndrome|Hereditary cancer-predisposing syndrome|not specified	Uncertain significance(Last reviewed: Jun 02, 2017)	Polymorphism	N
ATM	NM_000051.3(ATM):c.2770C>T (p.Arg924Trp)	VAR_041558	127358	Ataxia-telangiectasia syndrome|Hereditary cancer-predisposing syndrome|not specified	Uncertain significance(Last reviewed: Apr 12, 2017)	Polymorphism	N
ATM	NM_000051.3(ATM):c.8156G>A (p.Arg2719His)	VAR_041581	127456	Ataxia-telangiectasia syndrome|Hereditary cancer-predisposing syndrome|not specified	Uncertain significance(Last reviewed: Jan 25, 2017)	Polymorphism	N
ATM	NM_000051.3(ATM):c.749G>A (p.Arg250Gln)	VAR_041547	140915	Ataxia-telangiectasia syndrome|Hereditary cancer-predisposing syndrome|not specified	Uncertain significance(Last reviewed: Dec 21, 2016)	Polymorphism	N
ATM	NM_000051.3(ATM):c.1511A>G (p.Asn504Ser)	VAR_041552	220272	Ataxia-telangiectasia syndrome|Hereditary cancer-predisposing syndrome|not specified	Uncertain significance(Last reviewed: Mar 27, 2017)	Polymorphism	N
ATM	NM_000051.3(ATM):c.5882A>G (p.Tyr1961Cys)	VAR_041570	127413	Ataxia-telangiectasia syndrome|Hereditary cancer-predisposing syndrome|not specified	Uncertain significance(Last reviewed: May 19, 2017)	Polymorphism	N
ATM	NM_000051.3(ATM):c.7475T>G (p.Leu2492Arg)	VAR_041579	127446	Ataxia-telangiectasia syndrome|Hereditary cancer-predisposing syndrome|not provided|not specified	Uncertain significance(Last reviewed: Jan 26, 2017)	Polymorphism	N
ATM	NM_000051.3(ATM):c.8293G>A (p.Gly2765Ser)	VAR_010876	186351	Ataxia-telangiectasia syndrome|Hereditary cancer-predisposing syndrome	Pathogenic/Likely pathogenic(Last reviewed: Apr 04, 2017)	Polymorphism	N
ATM	NM_000051.3(ATM):c.146C>G (p.Ser49Cys)	VAR_010798	3048	Ataxia-telangiectasia syndrome|Breast cancer, susceptibility to|Hereditary cancer-predisposing syndrome|not provided|not specified	Benign/Likely benign, risk factor(Last reviewed: Jun 20, 2017)	Polymorphism	Y
ATM	NM_000051.3(ATM):c.3161C>G (p.Pro1054Arg)	VAR_010818	132695	Ataxia-telangiectasia syndrome|Hereditary cancer-predisposing syndrome|not specified	Benign(Last reviewed: Jan 30, 2017)	Polymorphism	Y
ATM	NM_000051.3(ATM):c.6235G>A (p.Val2079Ile)	VAR_010841	133629	Ataxia-telangiectasia syndrome|Hereditary cancer-predisposing syndrome|not specified	Benign/Likely benign(Last reviewed: May 30, 2017)	Polymorphism	Y
ATM	NM_000051.3(ATM):c.6860G>C (p.Gly2287Ala)	VAR_010849	127428	Ataxia-telangiectasia syndrome|Hereditary cancer-predisposing syndrome|not specified	Likely benign(Last reviewed: Feb 01, 2017)	Polymorphism	Y
ATM	NM_000051.3(ATM):c.5557G>A (p.Asp1853Asn)	VAR_010833	128458	Ataxia-telangiectasia syndrome|Hereditary cancer-predisposing syndrome|not specified	Benign/Likely benign(Last reviewed: Jun 02, 2017)	Polymorphism	Y
ATM	NM_000051.3(ATM):c.1636C>G (p.Leu546Val)	VAR_041554	133604	Ataxia-telangiectasia syndrome|Hereditary cancer-predisposing syndrome|not provided|not specified	Benign/Likely benign(Last reviewed: Jan 29, 2017)	Polymorphism	Y
ATM	NM_000051.3(ATM):c.378T>A (p.Asp126Glu)	VAR_010799	128455	Ataxia-telangiectasia syndrome|Hereditary cancer-predisposing syndrome|not specified	Benign/Likely benign(Last reviewed: Feb 14, 2017)	Polymorphism	Y
ATM	NM_000051.3(ATM):c.1541G>A (p.Gly514Asp)	VAR_010807	133602	Ataxia-telangiectasia syndrome|Hereditary cancer-predisposing syndrome|not provided|not specified	Benign/Likely benign(Last reviewed: Jan 30, 2017)	Polymorphism	Y
ATM	NM_000051.3(ATM):c.1744T>C (p.Phe582Leu)	VAR_041555	127342	Ataxia-telangiectasia syndrome|Hereditary cancer-predisposing syndrome|not specified	Benign/Likely benign(Last reviewed: Jan 27, 2017)	Polymorphism	Y
ATM	NM_000051.3(ATM):c.998C>T (p.Ser333Phe)	VAR_041548	127471	Ataxia-telangiectasia syndrome|Hereditary cancer-predisposing syndrome|not specified	Benign/Likely benign(Last reviewed: May 24, 2017)	Polymorphism	Y
ATM	NM_000051.3(ATM):c.4138C>T (p.His1380Tyr)	VAR_041562	133619	Ataxia-telangiectasia syndrome|Hereditary cancer-predisposing syndrome|not specified	Benign/Likely benign(Last reviewed: Jan 30, 2017)	Polymorphism	Y
ATM	NM_000051.3(ATM):c.2614C>T (p.Pro872Ser)	VAR_041557	133610	Ataxia-telangiectasia syndrome|Hereditary cancer-predisposing syndrome|not provided|not specified	Benign/Likely benign(Last reviewed: Jan 29, 2017)	Polymorphism	Y
ATM	NM_000051.3(ATM):c.2442C>A (p.Asp814Glu)	VAR_056681	133607	Ataxia-telangiectasia syndrome|Hereditary cancer-predisposing syndrome|not specified	Benign(Last reviewed: Jan 26, 2017)	Polymorphism	Y
ATM	NM_000051.3(ATM):c.544G>C (p.Val182Leu)	VAR_010800	132685	Ataxia-telangiectasia syndrome|Hereditary cancer-predisposing syndrome|not provided|not specified	Benign/Likely benign(Last reviewed: Jan 26, 2017)	Polymorphism	Y
ATM	NM_000051.3(ATM):c.2119T>C (p.Ser707Pro)	VAR_010810	128454	Ataxia-telangiectasia syndrome|Hereditary cancer-predisposing syndrome|not specified	Benign(Last reviewed: May 18, 2017)	Polymorphism	Y
ATM	NM_000051.3(ATM):c.6995T>C (p.Leu2332Pro)	VAR_041574	133631	Ataxia-telangiectasia syndrome|Hereditary cancer-predisposing syndrome|not provided|not specified	Benign/Likely benign(Last reviewed: Jan 29, 2017)	Polymorphism	Y
ATM	NM_000051.3(ATM):c.4949A>G (p.Asn1650Ser)	VAR_041566	127395	Ataxia-telangiectasia syndrome|Hereditary cancer-predisposing syndrome|not specified	Benign/Likely benign(Last reviewed: May 01, 2017)	Polymorphism	Y
ATM	NM_000051.3(ATM):c.2362A>C (p.Ser788Arg)	VAR_056680	127349	Ataxia-telangiectasia syndrome|Hereditary cancer-predisposing syndrome|not specified	Benign/Likely benign(Last reviewed: Jan 30, 2017)	Polymorphism	Y
ATM	NM_000051.3(ATM):c.5948G>A (p.Ser1983Asn)	VAR_041571	140790	Familial cancer of breast|Hereditary cancer-predisposing syndrome	Benign(Last reviewed: Aug 18, 2017)	Polymorphism	Y
ATM	NM_000051.3(ATM):c.5071A>C (p.Ser1691Arg)	VAR_010830	127399	Ataxia-telangiectasia syndrome|Hereditary cancer-predisposing syndrome|not specified	Benign/Likely benign(Last reviewed: May 22, 2017)	Unclassified	N
ATM	NM_000051.3(ATM):c.5071A>C (p.Ser1691Arg)	VAR_010830	127399	Ataxia-telangiectasia syndrome|Hereditary cancer-predisposing syndrome|not specified	Benign/Likely benign(Last reviewed: May 22, 2017)	Unclassified	N
ATM	NM_000051.3(ATM):c.7271T>G (p.Val2424Gly)	VAR_010854	3023	Ataxia-telangiectasia syndrome|Ataxia-telangiectasia syndrome|Ataxia-telangiectasia variant|Breast cancer, susceptibility to|Familial cancer of breast|Hereditary cancer-predisposing syndrome|Neoplasm of the breast|T-cell prolymphocytic leukemia|not provided|not specified	Pathogenic/Likely pathogenic, risk factor(Last reviewed: Jun 02, 2017)	Unclassified	N
ATM	NM_000051.3(ATM):c.7271T>G (p.Val2424Gly)	VAR_010854	3023	Ataxia-telangiectasia syndrome|Ataxia-telangiectasia syndrome|Ataxia-telangiectasia variant|Breast cancer, susceptibility to|Familial cancer of breast|Hereditary cancer-predisposing syndrome|Neoplasm of the breast|T-cell prolymphocytic leukemia|not provided|not specified	Pathogenic/Likely pathogenic, risk factor(Last reviewed: Jun 02, 2017)	Unclassified	N
ATM	NM_000051.3(ATM):c.9023G>A (p.Arg3008His)	VAR_010894	141634	Ataxia-telangiectasia syndrome|Hereditary cancer-predisposing syndrome|not provided	Likely pathogenic(Last reviewed: Dec 11, 2016)	Unclassified	N
ATM	NM_000051.3(ATM):c.1009C>T (p.Arg337Cys)	VAR_041549	127327	Ataxia-telangiectasia syndrome|Hereditary cancer-predisposing syndrome|not specified	Uncertain significance(Last reviewed: Dec 22, 2016)	Unclassified	Y
ATM	NM_000051.3(ATM):c.1010G>A (p.Arg337His)	VAR_041550	127328	Ataxia-telangiectasia syndrome|Hereditary cancer-predisposing syndrome|not specified	Uncertain significance(Last reviewed: Jan 19, 2017)	Unclassified	Y
ATM	NM_000051.3(ATM):c.68G>A (p.Arg23Gln)	VAR_041545	127429	Ataxia-telangiectasia syndrome|Hereditary cancer-predisposing syndrome|not specified	Uncertain significance(Last reviewed: Jan 16, 2017)	Unclassified	Y
ATM	NM_000051.3(ATM):c.5973A>C (p.Glu1991Asp)	VAR_041572	142164	Hereditary cancer-predisposing syndrome|not specified	Uncertain significance(Last reviewed: Mar 30, 2016)	Unclassified	Y
ATM	NM_000051.3(ATM):c.7328G>A (p.Arg2443Gln)	VAR_041577	142211	Ataxia-telangiectasia syndrome|Hereditary cancer-predisposing syndrome|not specified	Uncertain significance(Last reviewed: Mar 09, 2017)	Unclassified	Y
ATM	NM_000051.3(ATM):c.7223C>T (p.Ser2408Leu)	VAR_041576	181888	Ataxia-telangiectasia syndrome|Hereditary cancer-predisposing syndrome|not specified	Uncertain significance(Last reviewed: Jun 14, 2016)	Unclassified	Y
ATM	NM_000051.3(ATM):c.7996A>G (p.Thr2666Ala)	VAR_041580	219594	Ataxia-telangiectasia syndrome|Hereditary cancer-predisposing syndrome	Uncertain significance(Last reviewed: Aug 21, 2015)	Unclassified	Y
ATP13A2	NM_022089.3(ATP13A2):c.881G>A (p.Arg294Gln)	VAR_058453	128476	not specified	Benign(Last reviewed: Jan 22, 2015)	Polymorphism	Y
ATP1A3	NM_152296.4(ATP1A3):c.2443G>A (p.Glu815Lys)	VAR_068947	37108	Alternating hemiplegia of childhood 2|Dystonia 12|not provided	Pathogenic(Last reviewed: Dec 20, 2016)	Disease	Y
ATP1A3	NM_152296.4(ATP1A3):c.2839G>A (p.Gly947Arg)	VAR_068950	37110	Alternating hemiplegia of childhood 2|Dystonia 12|Hemiplegia|Seizure Disorders|not provided	Pathogenic(Last reviewed: Oct 12, 2016)	Disease	Y
ATP1A3	NM_152296.4(ATP1A3):c.2452G>A (p.Glu818Lys)	VAR_070772	156238	Alternating hemiplegia of childhood 2|Cerebellar ataxia, areflexia, pes cavus, optic atrophy and sensorinural hearing loss|Dystonia 12|Inborn genetic diseases|not provided	Pathogenic(Last reviewed: May 24, 2017)	Disease	Y
ATP1A3	NM_152296.4(ATP1A3):c.2401G>A (p.Asp801Asn)	VAR_068943	37107	Alternating hemiplegia of childhood 2|Alternating hemiplegia of childhood 2|Cerebellar ataxia, areflexia, pes cavus, optic atrophy and sensorinural hearing loss|Dystonia 12|not provided	Pathogenic(Last reviewed: May 18, 2017)	Disease	Y
ATP6V0A2	NM_012463.3(ATP6V0A2):c.2438C>T (p.Ala813Val)	VAR_042731	95521	Cutis laxa, recessive|not specified	Benign/Likely benign(Last reviewed: Jun 14, 2016)	Polymorphism	Y
ATP6V0A2	NM_012463.3(ATP6V0A2):c.2054G>A (p.Arg685Gln)	VAR_042730	235276	not provided|not specified	Benign/Likely benign(Last reviewed: Jul 11, 2016)	Polymorphism	Y
ATP6V0A4	NM_020632.2(ATP6V0A4):c.5T>C (p.Val2Ala)	VAR_020992	261345	Distal Renal Tubular Acidosis, Recessive|not specified	Benign(Last reviewed: Jun 14, 2016)	Polymorphism	Y
ATP6V1B1	NM_001692.3(ATP6V1B1):c.481G>A (p.Glu161Lys)	VAR_021014	44229	Renal tubular acidosis with progressive nerve deafness|not specified	Benign/Likely benign(Last reviewed: Jun 14, 2016)	Polymorphism	Y
ATP6V1B1	NM_001692.3(ATP6V1B1):c.89C>T (p.Thr30Ile)	VAR_021011	44231	Renal tubular acidosis with progressive nerve deafness|not specified	Benign(Last reviewed: Jun 14, 2016)	Polymorphism	Y
ATP7A	NM_000052.6(ATP7A):c.2299G>C (p.Val767Leu)	VAR_010000	92382	not specified	Benign(Last reviewed: Aug 15, 2016)	Polymorphism	Y
ATP7A	NM_000052.6(ATP7A):c.4390A>G (p.Ile1464Val)	VAR_016121	166709	not specified	Benign(Last reviewed: Jan 10, 2017)	Polymorphism	Y
ATP7B	NM_000053.3(ATP7B):c.1934T>G (p.Met645Arg)	VAR_000714	3862	Wilson disease	Pathogenic(Last reviewed: May 18, 2017)	Disease	Y
ATP7B	NM_000053.3(ATP7B):c.2123T>C (p.Leu708Pro)	VAR_000717	3865	Wilson disease|not specified	Pathogenic(Last reviewed: Feb 07, 2017)	Disease	Y
ATP7B	NM_000053.3(ATP7B):c.2128G>A (p.Gly710Ser)	VAR_000719	156281	Wilson disease|not provided	Pathogenic(Last reviewed: May 26, 2017)	Disease	Y
ATP7B	NM_000053.3(ATP7B):c.2605G>A (p.Gly869Arg)	VAR_000736	157939	Wilson disease|not provided	Pathogenic/Likely pathogenic(Last reviewed: Jun 10, 2016)	Disease	Y
ATP7B	NM_000053.3(ATP7B):c.3659C>T (p.Thr1220Met)	VAR_000778	35725	Wilson disease|not provided	Pathogenic/Likely pathogenic(Last reviewed: May 18, 2017)	Disease	Y
ATP7B	NM_000053.3(ATP7B):c.2975C>T (p.Pro992Leu)	VAR_000749	188831	Wilson disease|not provided	Pathogenic(Last reviewed: Dec 27, 2015)	Disease	Y
ATP7B	NM_000053.3(ATP7B):c.122A>G (p.Asn41Ser)	VAR_023011	157928	Wilson disease|not provided	Likely pathogenic(Last reviewed: Mar 06, 2017)	Disease	Y
ATP7B	NM_000053.3(ATP7B):c.2333G>T (p.Arg778Leu)	VAR_000728	3852	Wilson disease|not provided	Pathogenic(Last reviewed: Mar 28, 2017)	Disease	Y
ATP7B	NM_000053.3(ATP7B):c.2293G>A (p.Asp765Asn)	VAR_000724	3855	Wilson disease	Pathogenic/Likely pathogenic(Last reviewed: Aug 01, 2016)	Disease	Y
ATP7B	NM_000053.3(ATP7B):c.2930C>T (p.Thr977Met)	VAR_000748	35710	Wilson disease|not provided	Pathogenic(Last reviewed: May 18, 2017)	Disease	Y
ATP7B	NM_000053.3(ATP7B):c.3207C>A (p.His1069Gln)	VAR_000758	3848	Wilson disease|not provided|not specified	Pathogenic(Last reviewed: Jun 08, 2017)	Disease	Y
ATP7B	NM_000053.3(ATP7B):c.3182G>A (p.Gly1061Glu)	VAR_009017	312383	Wilson disease|not specified	Pathogenic(Last reviewed: Jan 12, 2017)	Disease	Y
ATP7B	NM_000053.3(ATP7B):c.2519C>T (p.Pro840Leu)	VAR_000733	188879	Wilson disease|not provided	Pathogenic/Likely pathogenic(Last reviewed: Mar 15, 2016)	Disease	Y
ATP7B	NM_000053.3(ATP7B):c.3646G>A (p.Val1216Met)	VAR_000776	188859	Wilson disease	Likely pathogenic(Last reviewed: Aug 28, 2015)	Disease	Y
ATP7B	NM_000053.3(ATP7B):c.2668G>A (p.Val890Met)	VAR_023023	189121	Wilson disease|not provided	Pathogenic/Likely pathogenic(Last reviewed: Aug 23, 2017)	Disease	Y
ATP7B	NM_000053.3(ATP7B):c.2495A>G (p.Lys832Arg)	VAR_000732	35707	Wilson disease|not specified	Benign(Last reviewed: Oct 10, 2016)	Polymorphism	Y
ATP7B	NM_000053.3(ATP7B):c.1216T>G (p.Ser406Ala)	VAR_000706	35701	Wilson disease|not specified	Benign/Likely benign(Last reviewed: Oct 10, 2016)	Polymorphism	Y
ATP7B	NM_000053.3(ATP7B):c.1366G>C (p.Val456Leu)	VAR_000708	35702	Wilson disease|not specified	Benign/Likely benign(Last reviewed: Oct 10, 2016)	Polymorphism	Y
ATP7B	NM_000053.3(ATP7B):c.3419T>C (p.Val1140Ala)	VAR_000765	35720	Wilson disease|not specified	Benign/Likely benign(Last reviewed: Oct 10, 2016)	Polymorphism	Y
ATP7B	NM_000053.3(ATP7B):c.2855G>A (p.Arg952Lys)	VAR_000746	35708	Wilson disease|not specified	Benign/Likely benign(Last reviewed: Oct 10, 2016)	Polymorphism	Y
ATP7B	NM_000053.3(ATP7B):c.3620A>G (p.His1207Arg)	VAR_009025	35724	Wilson disease|not specified	Benign/Likely benign(Last reviewed: Dec 29, 2016)	Polymorphism	Y
ATP7B	NM_000053.3(ATP7B):c.4135C>T (p.Pro1379Ser)	VAR_044494	157957	not specified	Uncertain significance(Last reviewed: Mar 23, 2017)	Unclassified	Y
ATP7B	NM_000053.3(ATP7B):c.1621G>A (p.Glu541Lys)	VAR_076696	92386	not provided|not specified	Uncertain significance(Last reviewed: Nov 30, 2016)	Unclassified	Y
ATP8B1	NM_005603.5(ATP8B1):c.607A>G (p.Lys203Glu)	VAR_043047	198532	not specified	Uncertain significance(Last reviewed: Nov 02, 2016)	Disease	N
ATP8B1	NM_005603.4(ATP8B1):c.2855G>A (p.Arg952Gln)	VAR_029273	259820	Familial Intrahepatic Cholestasis|not specified	Benign/Likely benign(Last reviewed: Jun 14, 2016)	Polymorphism	Y
ATP8B1	NM_005603.5(ATP8B1):c.913T>A (p.Phe305Ile)	VAR_043048	289557	not specified	Likely benign(Last reviewed: Jan 11, 2017)	Polymorphism	Y
ATP8B1	NM_005603.5(ATP8B1):c.1739G>A (p.Ser580Asn)	VAR_043062	327484	Familial Intrahepatic Cholestasis|not provided|not specified	Benign/Likely benign(Last reviewed: Jan 23, 2017)	Polymorphism	Y
ATP8B1	NM_005603.4(ATP8B1):c.2442G>T (p.Lys814Asn)	VAR_043070	195683	not specified	Benign/Likely benign(Last reviewed: Jun 20, 2017)	Polymorphism	Y
ATP8B1	NM_005603.4(ATP8B1):c.2021T>C (p.Met674Thr)	VAR_043066	259817	Familial Intrahepatic Cholestasis|not specified	Benign/Likely benign(Last reviewed: Jun 14, 2016)	Polymorphism	Y
ATP8B1	NM_005603.5(ATP8B1):c.1729A>G (p.Ile577Val)	VAR_029272	259816	Familial Intrahepatic Cholestasis|not specified	Benign/Likely benign(Last reviewed: Jun 14, 2016)	Polymorphism	Y
ATP8B1	NM_005603.5(ATP8B1):c.234C>G (p.His78Gln)	VAR_029271	259818	Familial Intrahepatic Cholestasis|not specified	Benign/Likely benign(Last reviewed: Jun 14, 2016)	Polymorphism	Y
ATR	NM_001184.3(ATR):c.632T>C (p.Met211Thr)	VAR_050532	93668	Seckel syndrome|not specified	Benign/Likely benign(Last reviewed: Jun 14, 2016)	Polymorphism	Y
ATR	NM_001184.3(ATR):c.7274G>A (p.Arg2425Gln)	VAR_041598	136470	Seckel syndrome|not specified	Benign/Likely benign(Last reviewed: Jun 14, 2016)	Polymorphism	Y
ATR	NM_001184.3(ATR):c.891G>C (p.Lys297Asn)	VAR_041586	158005	Hereditary cancer-predisposing syndrome|not specified	Benign/Likely benign(Last reviewed: Oct 23, 2015)	Polymorphism	Y
ATR	NM_001184.3(ATR):c.268C>T (p.His90Tyr)	VAR_041585	235760	Seckel syndrome|not provided|not specified	Benign/Likely benign(Last reviewed: Jul 05, 2016)	Polymorphism	Y
ATR	NM_001184.3(ATR):c.946G>A (p.Val316Ile)	VAR_041587	158006	Seckel syndrome|not specified	Benign/Likely benign(Last reviewed: Jun 14, 2016)	Polymorphism	Y
ATR	NM_001184.3(ATR):c.2875G>A (p.Val959Met)	VAR_041588	157974	Seckel syndrome|not specified	Benign/Likely benign(Last reviewed: Jun 14, 2016)	Polymorphism	Y
ATR	NM_001184.3(ATR):c.7300C>G (p.Pro2434Ala)	VAR_041599	158003	Seckel syndrome|not provided|not specified	Benign/Likely benign(Last reviewed: Feb 27, 2017)	Polymorphism	Y
ATR	NM_001184.3(ATR):c.4835A>G (p.Asn1612Ser)	VAR_041593	157989	Seckel syndrome|not provided|not specified	Benign/Likely benign(Last reviewed: Feb 27, 2017)	Polymorphism	Y
AVPR2	NM_000054.4(AVPR2):c.35G>A (p.Gly12Glu)	VAR_015296	254773	Nephrogenic diabetes insipidus|not specified	Benign(Last reviewed: Jun 14, 2016)	Polymorphism	Y
AVPR2	NM_000054.4(AVPR2):c.440C>T (p.Ala147Val)	VAR_003530	254774	Nephrogenic diabetes insipidus|not specified	Benign(Last reviewed: Jun 14, 2016)	Polymorphism	Y
B3GALT6	NM_080605.3(B3GALT6):c.522G>C (p.Glu174Asp)	VAR_059317	281204	not specified	Benign(Last reviewed: Oct 18, 2016)	Polymorphism	Y
B3GLCT	NM_194318.3(B3GLCT):c.1108G>A (p.Glu370Lys)	VAR_027849	96624	not specified	Benign(Last reviewed: Dec 10, 2014)	Polymorphism	Y
B4GALNT1	NM_001478.4(B4GALNT1):c.1547C>T (p.Ala516Val)	VAR_049237	235331	Spastic paraplegia|not provided	Benign(Last reviewed: Nov 02, 2016)	Polymorphism	Y
B4GALNT1	NM_001478.4(B4GALNT1):c.514G>C (p.Gly172Arg)	VAR_012053	380791	Spastic paraplegia|not specified	Benign(Last reviewed: Dec 28, 2016)	Polymorphism	Y
B9D1	NM_015681.4(B9D1):c.181C>T (p.Arg61Trp)	VAR_066995	260671	not specified	Benign(Last reviewed: May 09, 2016)	Polymorphism	Y
B9D2	NM_030578.3(B9D2):c.33A>G (p.Ile11Met)	VAR_066996	261881	Meckel-Gruber syndrome|not specified	Benign(Last reviewed: Jun 14, 2016)	Polymorphism	Y
BAAT	NM_001127610.1(BAAT):c.59G>A (p.Arg20Gln)	VAR_052303	257518	Hypercholanemia|not specified	Benign(Last reviewed: Jun 14, 2016)	Polymorphism	Y
BAG3	NM_004281.3(BAG3):c.1138C>T (p.Pro380Ser)	VAR_066784	162782	Dilated cardiomyopathy 1HH|Myofibrillar myopathy, BAG3-related|not provided|not specified	Benign/Likely benign(Last reviewed: Nov 14, 2016)	Polymorphism	Y
BAG3	NM_004281.3(BAG3):c.451T>C (p.Cys151Arg)	VAR_048345	44783	Cardiovascular phenotype|Dilated Cardiomyopathy, Dominant|Myofibrillar Myopathy, Dominant|not specified	Benign(Last reviewed: Jun 14, 2016)	Polymorphism	Y
BAG3	NM_004281.3(BAG3):c.212G>A (p.Arg71Gln)	VAR_048344	44780	Cardiovascular phenotype|Dilated Cardiomyopathy, Dominant|Dilated cardiomyopathy 1HH|Myofibrillar Myopathy, Dominant|Myofibrillar myopathy, BAG3-related|not specified	Benign/Likely benign(Last reviewed: Feb 09, 2017)	Polymorphism	Y
BAG3	NM_004281.3(BAG3):c.1220C>T (p.Pro407Leu)	VAR_048347	44776	Cardiovascular phenotype|Dilated Cardiomyopathy, Dominant|Myofibrillar Myopathy, Dominant|not specified	Benign(Last reviewed: Jun 14, 2016)	Polymorphism	Y
BAG3	NM_004281.3(BAG3):c.463G>A (p.Ala155Thr)	VAR_066780	44784	Cardiovascular phenotype|Dilated Cardiomyopathy, Dominant|Dilated cardiomyopathy 1HH|Myofibrillar Myopathy, Dominant|Myofibrillar myopathy, BAG3-related|not specified	Benign/Likely benign(Last reviewed: Jun 06, 2017)	Polymorphism	Y
BAG3	NM_004281.3(BAG3):c.898G>A (p.Asp300Asn)	VAR_066783	201676	Cardiovascular phenotype|Dilated Cardiomyopathy, Dominant|Dilated cardiomyopathy 1HH|Myofibrillar Myopathy, Dominant|Myofibrillar myopathy, BAG3-related|not specified	Benign/Likely benign(Last reviewed: Aug 15, 2016)	Polymorphism	Y
BARD1	NM_000465.3(BARD1):c.556A>G (p.Ser186Gly)	VAR_038371	230396	Familial cancer of breast|Hereditary cancer-predisposing syndrome|not specified	Uncertain significance(Last reviewed: Jan 04, 2017)	Polymorphism	N
BARD1	NM_000465.3(BARD1):c.70C>T (p.Pro24Ser)	VAR_010354	183698	Hereditary cancer-predisposing syndrome|Neoplasm of the breast|not specified	Benign/Likely benign(Last reviewed: Jun 22, 2017)	Polymorphism	Y
BARD1	NM_000465.3(BARD1):c.1519G>A (p.Val507Met)	VAR_010356	140757	Hereditary cancer-predisposing syndrome|Neoplasm of the breast|not specified	Benign/Likely benign(Last reviewed: Jun 08, 2017)	Polymorphism	Y
BARD1	NM_000465.3(BARD1):c.1134G>C (p.Arg378Ser)	VAR_024611	142769	Hereditary cancer-predisposing syndrome|Neoplasm of the breast|not specified	Benign/Likely benign(Last reviewed: Jun 07, 2017)	Polymorphism	Y
BARD1	NM_000465.3(BARD1):c.1670G>C (p.Cys557Ser)	VAR_010357	8045	Breast cancer, susceptibility to|Familial cancer of breast|Hereditary cancer-predisposing syndrome|Neoplasm of the breast|not specified	Benign/Likely benign, risk factor(Last reviewed: Jan 29, 2017)	Polymorphism	Y
BARD1	NM_000465.3(BARD1):c.722C>G (p.Ser241Cys)	VAR_020109	136497	Familial cancer of breast|Hereditary cancer-predisposing syndrome|not specified	Benign/Likely benign(Last reviewed: Jan 05, 2017)	Polymorphism	Y
BARD1	NM_000465.3(BARD1):c.1972C>T (p.Arg658Cys)	VAR_010359	136500	Familial cancer of breast|Hereditary cancer-predisposing syndrome|Neoplasm of the breast|not specified	Benign/Likely benign(Last reviewed: Feb 06, 2017)	Polymorphism	Y
BBS1	NM_024649.4(BBS1):c.1169T>G (p.Met390Arg)	VAR_017216	12143	Bardet-Biedl syndrome|Bardet-Biedl syndrome 1|Retinal dystrophy|Retinal dystrophy|Retinitis pigmentosa|not provided	Pathogenic/Likely pathogenic(Last reviewed: May 18, 2017)	Disease	Y
BBS10	NM_024685.3(BBS10):c.145C>T (p.Arg49Trp)	VAR_026392	225010	Bardet-Biedl syndrome|Inborn genetic diseases	Pathogenic(Last reviewed: Jun 14, 2016)	Disease	Y
BBS10	NM_024685.3(BBS10):c.1616C>T (p.Pro539Leu)	VAR_052272	166721	Bardet-Biedl syndrome|not specified	Benign/Likely benign(Last reviewed: Jan 18, 2017)	Polymorphism	Y
BBS12	NM_152618.2(BBS12):c.1574G>A (p.Arg525His)	VAR_066275	220303	Bardet-Biedl syndrome|not specified	Uncertain significance(Last reviewed: Mar 28, 2016)	Disease	N
BBS12	NM_001178007.1(BBS12):c.1381A>C (p.Asn461His)	VAR_034929	100564	Bardet-Biedl syndrome|not provided|not specified	Benign/Likely benign(Last reviewed: May 30, 2017)	Polymorphism	Y
BBS12	NM_152618.2(BBS12):c.1399G>A (p.Asp467Asn)	VAR_034930	166727	Bardet-Biedl syndrome|not specified	Benign/Likely benign(Last reviewed: Jun 14, 2016)	Polymorphism	Y
BBS12	NM_152618.2(BBS12):c.116T>C (p.Ile39Thr)	VAR_034919	96504	Bardet-Biedl syndrome|not provided|not specified	Benign/Likely benign(Last reviewed: May 09, 2017)	Polymorphism	Y
BBS12	NM_152618.2(BBS12):c.378G>T (p.Glu126Asp)	VAR_034921	262674	Bardet-Biedl syndrome|not specified	Benign/Likely benign(Last reviewed: Jun 14, 2016)	Polymorphism	Y
BBS12	NM_152618.2(BBS12):c.1157G>A (p.Arg386Gln)	VAR_034927	166725	Bardet-Biedl syndrome|not specified	Benign(Last reviewed: Jun 14, 2016)	Polymorphism	Y
BBS12	NM_152618.2(BBS12):c.1286G>C (p.Ser429Thr)	VAR_034928	195416	Bardet-Biedl syndrome|not specified	Benign/Likely benign(Last reviewed: Jun 14, 2016)	Polymorphism	Y
BBS2	NM_031885.3(BBS2):c.367A>G (p.Ile123Val)	VAR_013165	261981	Bardet-Biedl syndrome|not specified	Benign(Last reviewed: Jun 14, 2016)	Polymorphism	Y
BBS2	NM_031885.3(BBS2):c.1511C>T (p.Ala504Val)	VAR_029748	100595	Bardet-Biedl syndrome|not provided|not specified	Benign/Likely benign(Last reviewed: Jun 14, 2016)	Polymorphism	Y
BBS4	NM_033028.4(BBS4):c.1236A>T (p.Glu412Asp)	VAR_066288	262136	not specified	Benign/Likely benign(Last reviewed: Feb 04, 2016)	Polymorphism	Y
BBS4	NM_033028.4(BBS4):c.1061T>C (p.Ile354Thr)	VAR_017054	21734	Bardet-Biedl syndrome|not provided|not specified	Benign/Likely benign(Last reviewed: Jun 14, 2016)	Polymorphism	Y
BBS5	NM_152384.2(BBS5):c.620G>A (p.Arg207His)	VAR_025317	96499	Bardet-Biedl syndrome|not specified	Benign(Last reviewed: Nov 07, 2016)	Polymorphism	Y
BBS9	NM_198428.2(BBS9):c.1993C>T (p.Leu665Phe)	VAR_066293	166740	Bardet-Biedl syndrome|not specified	Benign(Last reviewed: Nov 24, 2016)	Polymorphism	Y
BBS9	NM_198428.2(BBS9):c.1363G>A (p.Ala455Thr)	VAR_051290	263117	Bardet-Biedl syndrome|not specified	Benign/Likely benign(Last reviewed: Jun 14, 2016)	Polymorphism	Y
BBS9	NM_198428.2(BBS9):c.34A>G (p.Thr12Ala)	VAR_051289	263130	Bardet-Biedl syndrome|not specified	Benign/Likely benign(Last reviewed: Jun 14, 2016)	Polymorphism	Y
BBS9	NM_198428.2(BBS9):c.1646C>T (p.Thr549Ile)	VAR_066292	194684	not provided|not specified	Benign(Last reviewed: Dec 30, 2016)	Polymorphism	Y
BCKDHA	NM_000709.3(BCKDHA):c.1312T>A (p.Tyr438Asn)	VAR_004973	100009	Maple syrup urine disease|Maple syrup urine disease type 1A|not provided	Pathogenic(Last reviewed: Jul 05, 2017)	Disease	Y
BCKDHA	NM_000709.3(BCKDHA):c.868G>A (p.Gly290Arg)	VAR_015101	2377	MAPLE SYRUP URINE DISEASE, INTERMEDIATE, TYPE IA|Maple syrup urine disease|not provided	Pathogenic(Last reviewed: Aug 25, 2013)	Disease	Y
BCKDHA	NM_000709.3(BCKDHA):c.452C>T (p.Thr151Met)	VAR_034361	93361	Maple syrup urine disease|not specified	Benign/Likely benign(Last reviewed: Jun 14, 2016)	Polymorphism	Y
BCKDHB	NM_183050.3(BCKDHB):c.509G>A (p.Arg170His)	VAR_068348	96591	Maple syrup urine disease|not provided	Pathogenic/Likely pathogenic(Last reviewed: May 13, 2015)	Disease	Y
BDNF	NM_170735.5(BDNF):c.196G>A (p.Val66Met)	VAR_004626	17697	Anorexia nervosa 2|Bipolar affective disorder, susceptibility to|Bulimia nervosa 2|Memory impairment, susceptibility to|Obsessive-compulsive disorder, protection against|Parkinson disease|not specified	Benign, protective, risk factor(Last reviewed: Jun 02, 2017)	Polymorphism	Y
BEST1	NM_004183.3(BEST1):c.619C>A (p.Leu207Ile)	VAR_025734	99727	Retinitis Pigmentosa, Recessive|Vitelliform macular dystrophy type 2|Vitreoretinochoroidopathy|not provided|not specified	Benign/Likely benign(Last reviewed: Jun 14, 2016)	Disease	N
BEST1	NM_004183.3(BEST1):c.584C>T (p.Ala195Val)	VAR_017381	99725	Bestrophinopathy, autosomal recessive|not provided	Likely pathogenic(Last reviewed: Mar 27, 2017)	Disease	Y
BEST1	NM_004183.3(BEST1):c.584C>T (p.Ala195Val)	VAR_017381	99725	Bestrophinopathy, autosomal recessive|not provided	Likely pathogenic(Last reviewed: Mar 27, 2017)	Disease	Y
BEST1	NM_004183.3(BEST1):c.652C>T (p.Arg218Cys)	VAR_000849	99735	Vitelliform macular dystrophy type 2|not provided	Pathogenic/Likely pathogenic(Last reviewed: Apr 08, 2015)	Disease	Y
BICD2	NM_001003800.1(BICD2):c.269A>G (p.Lys90Arg)	VAR_070111	235235	not provided|not specified	Likely benign(Last reviewed: Apr 28, 2017)	Polymorphism	Y
BLM	NM_000057.3(BLM):c.2603C>T (p.Pro868Leu)	VAR_022298	92393	Bloom syndrome|not specified	Benign/Likely benign(Last reviewed: Jun 14, 2016)	Polymorphism	Y
BLM	NM_000057.3(BLM):c.3128C>A (p.Ala1043Asp)	VAR_051731	136516	Bloom syndrome|not specified	Benign/Likely benign(Last reviewed: Jan 27, 2017)	Polymorphism	Y
BLM	NM_000057.3(BLM):c.410A>G (p.Lys137Arg)	VAR_022295	133707	Bloom syndrome|not provided|not specified	Benign/Likely benign(Last reviewed: Jan 17, 2017)	Polymorphism	Y
BLM	NM_000057.3(BLM):c.893C>T (p.Thr298Met)	VAR_022296	92397	Bloom syndrome|not specified	Benign/Likely benign(Last reviewed: Jan 26, 2017)	Polymorphism	Y
BLM	NM_000057.3(BLM):c.3961G>A (p.Val1321Ile)	VAR_022301	128530	Bloom syndrome|not specified	Benign/Likely benign(Last reviewed: Jun 14, 2016)	Polymorphism	Y
BMP15	NM_005448.2(BMP15):c.13A>C (p.Ser5Arg)	VAR_058974	259774	Ovarian Dysgenesis|not specified	Benign/Likely benign(Last reviewed: Jun 14, 2016)	Polymorphism	Y
BMP15	NM_005448.2(BMP15):c.308A>G (p.Asn103Ser)	VAR_058980	136523	Ovarian Dysgenesis|not specified	Benign(Last reviewed: Jun 14, 2016)	Polymorphism	Y
BMP2	NM_001200.3(BMP2):c.109T>G (p.Ser37Ala)	VAR_020061	195137	not specified	Benign(Last reviewed: Oct 08, 2014)	Polymorphism	Y
BMP2	NM_001200.3(BMP2):c.570A>T (p.Arg190Ser)	VAR_024232	196322	not specified	Benign(Last reviewed: Jan 21, 2015)	Polymorphism	Y
BMP4	NM_001202.5(BMP4):c.455T>C (p.Val152Ala)	VAR_016174	197190	BMP4-Related Syndromic Microphthalmia|Cleft Lip +/- Cleft Palate, Autosomal Dominant|Orofacial cleft|Syndromic Microphthalmia, Dominant|not specified	Benign/Likely benign(Last reviewed: Jun 14, 2016)	Polymorphism	Y
BMPR1A	NM_004329.2(BMPR1A):c.1348G>A (p.Val450Met)	VAR_041399	142024	Hereditary cancer-predisposing syndrome|Juvenile polyposis syndrome|not specified	Uncertain significance(Last reviewed: Feb 16, 2017)	Polymorphism	N
BMPR1A	NM_004329.2(BMPR1A):c.4C>A (p.Pro2Thr)	VAR_041397	41782	Hereditary cancer-predisposing syndrome|Juvenile Polyposis|not provided|not specified	Benign(Last reviewed: Aug 15, 2016)	Polymorphism	Y
BMPR1A	NM_004329.2(BMPR1A):c.1379T>C (p.Met460Thr)	VAR_077353	185192	Hereditary cancer-predisposing syndrome|not specified	Uncertain significance(Last reviewed: Sep 14, 2016)	Unclassified	Y
BMPR2	NM_001204.6(BMPR2):c.2324G>A (p.Ser775Asn)	VAR_019996	136528	Primary pulmonary hypertension|not specified	Benign/Likely benign(Last reviewed: Jan 05, 2017)	Polymorphism	Y
BRAF	NM_004333.4(BRAF):c.1785T>G (p.Phe595Leu)	VAR_018625	177672	Cardio-facio-cutaneous syndrome|Malignant melanoma|Neoplasm|not provided	Pathogenic/Likely pathogenic(Last reviewed: May 13, 2016)	Disease	Y
BRAF	NM_004333.4(BRAF):c.1391G>A (p.Gly464Glu)	VAR_018615	13964	Carcinoma of colon|Chronic lymphocytic leukemia|Neoplasm|Rasopathy|not provided	Pathogenic/Likely pathogenic(Last reviewed: May 13, 2016)	Disease	Y
BRAF	NM_004333.4(BRAF):c.1406G>A (p.Gly469Glu)	VAR_018621	13974	Adenocarcinoma of lung|Adenocarcinoma of prostate|Cardio-facio-cutaneous syndrome|Cardiofaciocutaneous syndrome 1|Colorectal Neoplasms|Malignant melanoma|Malignant melanoma of skin|Multiple myeloma|Rasopathy|Squamous cell carcinoma of lung|Squamous cell carcinoma of the skin|Transitional cell carcinoma of the bladder|not provided|not specified	Pathogenic/Likely pathogenic(Last reviewed: Mar 10, 2017)	Disease	Y
BRAF	NM_004333.4(BRAF):c.1801A>C (p.Lys601Gln)	VAR_058629	41446	Rasopathy|not provided	Pathogenic(Last reviewed: Apr 12, 2016)	Disease	Y
BRAF	NM_004333.4(BRAF):c.1789C>G (p.Leu597Val)	VAR_018627	13969	Lung cancer|Malignant melanoma|Neoplasm|Non-small cell lung cancer|Noonan syndrome 1|Noonan syndrome 7|Rasopathy|not provided	Pathogenic/Likely pathogenic(Last reviewed: May 15, 2017)	Disease	Y
BRAF	NM_004333.4(BRAF):c.736G>C (p.Ala246Pro)	VAR_026113	13965	Cardio-facio-cutaneous syndrome|Cardiofaciocutaneous syndrome 1|Rasopathy|not provided	Pathogenic(Last reviewed: Feb 29, 2016)	Disease	Y
BRAF	NM_004333.4(BRAF):c.770A>G (p.Gln257Arg)	VAR_026114	13973	Cardio-facio-cutaneous syndrome|Cardiofaciocutaneous syndrome 1|Rasopathy|not provided|not specified	Pathogenic(Last reviewed: Dec 21, 2016)	Disease	Y
BRAF	NM_004333.4(BRAF):c.1495A>G (p.Lys499Glu)	VAR_026116	13976	Cardiofaciocutaneous syndrome 1|not provided	Pathogenic/Likely pathogenic(Last reviewed: Jul 23, 2015)	Disease	Y
BRAF	NM_004333.4(BRAF):c.1501G>A (p.Glu501Lys)	VAR_026118	13977	Cardiofaciocutaneous syndrome 1|Noonan syndrome 7|Rasopathy|not provided	Pathogenic/Likely pathogenic(Last reviewed: Dec 29, 2015)	Disease	Y
BRAF	NM_004333.4(BRAF):c.1502A>G (p.Glu501Gly)	VAR_026117	13978	Cardio-facio-cutaneous syndrome|Cardiofaciocutaneous syndrome 1|Downslanted palpebral fissures|High forehead|Low-set, posteriorly rotated ears|Neonatal respiratory distress|Premature birth|Pulmonic stenosis|Ventricular hypertrophy|Ventricular septal defect|Webbed neck|Wide intermamillary distance|not provided	Pathogenic/Likely pathogenic(Last reviewed: Feb 16, 2017)	Disease	Y
BRAF	NM_004333.4(BRAF):c.1741A>G (p.Asn581Asp)	VAR_026119	13979	Cardio-facio-cutaneous syndrome|Cardiofaciocutaneous syndrome 1|Rasopathy|not provided	Pathogenic(Last reviewed: Jan 11, 2017)	Disease	Y
BRAF	NM_004333.4(BRAF):c.1914T>G (p.Asp638Glu)	VAR_058630	13981	Cardio-facio-cutaneous syndrome|not provided	Pathogenic(Last reviewed: Sep 11, 2014)	Disease	Y
BRAF	NM_004333.4(BRAF):c.721A>C (p.Thr241Pro)	VAR_058621	29807	Cardio-facio-cutaneous syndrome|Cardiofaciocutaneous syndrome 1|Cardiofaciocutaneous syndrome 1|LEOPARD syndrome 3|LEOPARD syndrome 3|Lung cancer|Noonan syndrome 1|Noonan syndrome 7|Noonan syndrome with multiple lentigines|not provided	Pathogenic/Likely pathogenic(Last reviewed: May 18, 2017)	Disease	Y
BRAF	NM_004333.4(BRAF):c.721A>C (p.Thr241Pro)	VAR_058621	29807	Cardio-facio-cutaneous syndrome|Cardiofaciocutaneous syndrome 1|Cardiofaciocutaneous syndrome 1|LEOPARD syndrome 3|LEOPARD syndrome 3|Lung cancer|Noonan syndrome 1|Noonan syndrome 7|Noonan syndrome with multiple lentigines|not provided	Pathogenic/Likely pathogenic(Last reviewed: May 18, 2017)	Disease	Y
BRAF	NM_004333.4(BRAF):c.730A>C (p.Thr244Pro)	VAR_065171	40346	Cardio-facio-cutaneous syndrome|not provided	Pathogenic(Last reviewed: Nov 19, 2014)	Disease	Y
BRAF	NM_004333.4(BRAF):c.735A>C (p.Leu245Phe)	VAR_058623	40347	Cardio-facio-cutaneous syndrome|Cardiofaciocutaneous syndrome 1|LEOPARD syndrome 3|LEOPARD syndrome 3|Lung cancer|Noonan syndrome 1|Noonan syndrome 7|Rasopathy|not provided	Pathogenic/Likely pathogenic(Last reviewed: May 18, 2017)	Disease	Y
BRAF	NM_004333.4(BRAF):c.735A>T (p.Leu245Phe)	VAR_058623	40348	Cardio-facio-cutaneous syndrome|Noonan syndrome with multiple lentigines|not provided	Pathogenic/Likely pathogenic(Last reviewed: Aug 22, 2012)	Disease	Y
BRAF	NM_004333.4(BRAF):c.1403T>C (p.Phe468Ser)	VAR_035097	40366	Cardio-facio-cutaneous syndrome|not provided	Pathogenic(Last reviewed: Dec 07, 2016)	Disease	Y
BRAF	NM_004333.4(BRAF):c.1497A>C (p.Lys499Asn)	VAR_058625	40371	not provided	Pathogenic/Likely pathogenic(Last reviewed: Jul 23, 2015)	Disease	Y
BRAF	NM_004333.4(BRAF):c.1787G>T (p.Gly596Val)	VAR_035098	40387	Adenocarcinoma of lung|Cardio-facio-cutaneous syndrome|Glioblastoma|Multiple myeloma|Rasopathy|Transitional cell carcinoma of the bladder|not provided	Pathogenic/Likely pathogenic(Last reviewed: May 31, 2016)	Disease	Y
BRAF	NM_004333.4(BRAF):c.722C>T (p.Thr241Met)	VAR_058620	29805	Cardiofaciocutaneous syndrome 1|LEOPARD syndrome 3|Lung cancer|Noonan syndrome|Noonan syndrome 1|Noonan syndrome 1|Noonan syndrome 7|Noonan syndrome 7|not provided	Pathogenic(Last reviewed: May 18, 2017)	Polymorphism	N
BRAF	NM_004333.4(BRAF):c.1785T>G (p.Phe595Leu)	VAR_018625	177672	Cardio-facio-cutaneous syndrome|Malignant melanoma|Neoplasm|not provided	Pathogenic/Likely pathogenic(Last reviewed: May 13, 2016)	Unclassified	N
BRAF	NM_004333.4(BRAF):c.1391G>T (p.Gly464Val)	VAR_018616	40364	Neoplasm|Neoplasm of the breast|Non-small cell lung cancer|Rasopathy	Pathogenic/Likely pathogenic(Last reviewed: May 13, 2016)	Unclassified	N
BRAF	NM_004333.4(BRAF):c.1406G>A (p.Gly469Glu)	VAR_018621	13974	Adenocarcinoma of lung|Adenocarcinoma of prostate|Cardio-facio-cutaneous syndrome|Cardiofaciocutaneous syndrome 1|Colorectal Neoplasms|Malignant melanoma|Malignant melanoma of skin|Multiple myeloma|Rasopathy|Squamous cell carcinoma of lung|Squamous cell carcinoma of the skin|Transitional cell carcinoma of the bladder|not provided|not specified	Pathogenic/Likely pathogenic(Last reviewed: Mar 10, 2017)	Unclassified	N
BRCA1	NM_007294.3(BRCA1):c.1383T>A (p.Phe461Leu)	VAR_007765	54227	Breast-ovarian cancer, familial 1|Familial cancer of breast|Hereditary cancer-predisposing syndrome|not specified	Uncertain significance(Last reviewed: Dec 27, 2015)	Disease	N
BRCA1	NM_007294.3(BRCA1):c.3600G>C (p.Gln1200His)	VAR_020691	54930	Breast-ovarian cancer, familial 1|Hereditary breast and ovarian cancer syndrome|Hereditary cancer-predisposing syndrome|not specified	Benign/Likely benign(Last reviewed: May 02, 2017)	Disease	N
BRCA1	NM_007294.3(BRCA1):c.3600G>T (p.Gln1200His)	VAR_020691	54931	Breast-ovarian cancer, familial 1|Hereditary breast and ovarian cancer syndrome|Hereditary cancer-predisposing syndrome|not specified	Benign/Likely benign(Last reviewed: Jan 28, 2017)	Disease	N
BRCA1	NM_007294.3(BRCA1):c.3600G>C (p.Gln1200His)	VAR_020691	54930	Breast-ovarian cancer, familial 1|Hereditary breast and ovarian cancer syndrome|Hereditary cancer-predisposing syndrome|not specified	Benign/Likely benign(Last reviewed: May 02, 2017)	Disease	N
BRCA1	NM_007294.3(BRCA1):c.3600G>T (p.Gln1200His)	VAR_020691	54931	Breast-ovarian cancer, familial 1|Hereditary breast and ovarian cancer syndrome|Hereditary cancer-predisposing syndrome|not specified	Benign/Likely benign(Last reviewed: Jan 28, 2017)	Disease	N
BRCA1	NM_007294.3(BRCA1):c.2245G>T (p.Asp749Tyr)	VAR_020683	54512	Breast-ovarian cancer, familial 1|Hereditary breast and ovarian cancer syndrome|Hereditary cancer-predisposing syndrome	Uncertain significance(Last reviewed: Oct 30, 2016)	Disease	N
BRCA1	NM_007294.3(BRCA1):c.191G>A (p.Cys64Tyr)	VAR_007759	54400	Breast-ovarian cancer, familial 1|Hereditary breast and ovarian cancer syndrome|Hereditary cancer-predisposing syndrome|not provided	Pathogenic(Last reviewed: Mar 10, 2017)	Polymorphism	N
BRCA1	NM_007294.3(BRCA1):c.716A>G (p.His239Arg)	VAR_007760	55677	Breast-ovarian cancer, familial 1|Familial cancer of breast|Hereditary cancer-predisposing syndrome|not specified	Uncertain significance(Last reviewed: Apr 21, 2017)	Polymorphism	N
BRCA1	NM_007294.3(BRCA1):c.1137T>G (p.Ile379Met)	VAR_007764	54143	Breast-ovarian cancer, familial 1|Familial cancer of breast|Hereditary breast and ovarian cancer syndrome|Hereditary cancer-predisposing syndrome|Neoplasm of the breast|not specified	Benign/Likely benign(Last reviewed: Feb 23, 2017)	Polymorphism	Y
BRCA1	NM_007294.3(BRCA1):c.5074G>A (p.Asp1692Asn)	VAR_008763	37632	Breast-ovarian cancer, familial 1|Familial cancer of breast|Hereditary breast and ovarian cancer syndrome|Hereditary cancer-predisposing syndrome|not provided	Pathogenic/Likely pathogenic(Last reviewed: Aug 29, 2016)	Unclassified	N
BRCA1	NM_007294.3(BRCA1):c.212G>A (p.Arg71Lys)	VAR_020681	54471	Breast-ovarian cancer, familial 1|Familial cancer of breast|Hereditary breast and ovarian cancer syndrome	Pathogenic(Last reviewed: Oct 02, 2015)	Unclassified	N
BRCA1	NM_007294.3(BRCA1):c.4484G>T (p.Arg1495Met)	VAR_063900	37598	Breast-ovarian cancer, familial 1|Familial cancer of breast|Hereditary breast and ovarian cancer syndrome|Hereditary cancer-predisposing syndrome|not provided|not specified	Pathogenic(Last reviewed: Aug 01, 2017)	Unclassified	N
BRCA1	NM_007294.3(BRCA1):c.5326C>T (p.Pro1776Ser)	VAR_008764	409312	Hereditary breast and ovarian cancer syndrome|not specified	Uncertain significance(Last reviewed: Oct 05, 2016)	Unclassified	Y
BRCA1	NM_007294.3(BRCA1):c.5357T>C (p.Leu1786Pro)	VAR_020704	91649	Breast-ovarian cancer, familial 1|Hereditary breast and ovarian cancer syndrome|Hereditary cancer-predisposing syndrome|not specified	Uncertain significance(Last reviewed: Feb 20, 2017)	Unclassified	Y
BRCA1	NM_007294.3(BRCA1):c.3800T>C (p.Leu1267Ser)	VAR_070482	142031	Hereditary breast and ovarian cancer syndrome|Hereditary cancer-predisposing syndrome|not specified	Uncertain significance(Last reviewed: Jun 23, 2017)	Unclassified	Y
BRCA1	NM_007294.3(BRCA1):c.734A>T (p.Asp245Val)	VAR_070470	55682	Breast-ovarian cancer, familial 1|Hereditary breast and ovarian cancer syndrome|Hereditary cancer-predisposing syndrome|not specified	Uncertain significance(Last reviewed: Nov 21, 2016)	Unclassified	Y
BRCA1	NM_007294.3(BRCA1):c.692C>T (p.Thr231Met)	VAR_070469	55669	Breast-ovarian cancer, familial 1|Hereditary breast and ovarian cancer syndrome|Hereditary cancer-predisposing syndrome|not specified	Uncertain significance(Last reviewed: Aug 14, 2017)	Unclassified	Y
BRCA1	NM_007294.3(BRCA1):c.3416G>T (p.Ser1139Ile)	VAR_020689	54873	Breast-ovarian cancer, familial 1|Hereditary breast and ovarian cancer syndrome|Hereditary cancer-predisposing syndrome|not specified	Uncertain significance(Last reviewed: Feb 14, 2017)	Unclassified	Y
BRCA1	NM_007294.3(BRCA1):c.811G>C (p.Val271Leu)	VAR_070472	55721	Breast-ovarian cancer, familial 1|Hereditary breast and ovarian cancer syndrome|Hereditary cancer-predisposing syndrome|not specified	Uncertain significance(Last reviewed: Oct 10, 2016)	Unclassified	Y
BRCA1	NM_007294.3(BRCA1):c.508C>T (p.Arg170Trp)	VAR_070466	55393	Breast-ovarian cancer, familial 1|Hereditary breast and ovarian cancer syndrome|Hereditary cancer-predisposing syndrome|not specified	Uncertain significance(Last reviewed: Aug 23, 2016)	Unclassified	Y
BRCA1	NM_007294.3(BRCA1):c.2662C>T (p.His888Tyr)	VAR_020687	54632	Breast-ovarian cancer, familial 1|Hereditary breast and ovarian cancer syndrome|Hereditary cancer-predisposing syndrome|not specified	Uncertain significance(Last reviewed: Mar 10, 2017)	Unclassified	Y
BRCA1	NM_007294.3(BRCA1):c.2393C>T (p.Pro798Leu)	VAR_070475	232813	Hereditary breast and ovarian cancer syndrome|Hereditary cancer-predisposing syndrome	Uncertain significance(Last reviewed: Jan 12, 2017)	Unclassified	Y
BRCA2	NM_000059.3(BRCA2):c.8182G>A (p.Val2728Ile)	VAR_020736	41565	Breast-ovarian cancer, familial 2|Hereditary breast and ovarian cancer syndrome|Hereditary cancer-predisposing syndrome|Neoplasm of the breast|not provided|not specified	Benign/Likely benign(Last reviewed: Apr 18, 2017)	Disease	N
BRCA2	NM_000059.3(BRCA2):c.5937C>G (p.Ser1979Arg)	VAR_056755	38009	Breast-ovarian cancer, familial 2|Hereditary breast and ovarian cancer syndrome|Hereditary cancer-predisposing syndrome|not specified	Uncertain significance(Last reviewed: Apr 12, 2017)	Polymorphism	N
BRCA2	NM_000059.3(BRCA2):c.6714T>G (p.Asp2238Glu)	VAR_056756	52167	Breast-ovarian cancer, familial 2|Familial cancer of breast|Hereditary cancer-predisposing syndrome|not specified	Uncertain significance(Last reviewed: Apr 01, 2016)	Polymorphism	N
BRCA2	NM_000059.3(BRCA2):c.9302T>G (p.Leu3101Arg)	VAR_056761	38230	Breast-ovarian cancer, familial 2|Hereditary breast and ovarian cancer syndrome|Hereditary cancer-predisposing syndrome|not specified	Uncertain significance(Last reviewed: Jul 18, 2017)	Polymorphism	N
BRCA2	NM_000059.3(BRCA2):c.7339A>G (p.Asn2447Asp)	VAR_056758	185933	Breast-ovarian cancer, familial 2|Hereditary breast and ovarian cancer syndrome|Hereditary cancer-predisposing syndrome	Uncertain significance(Last reviewed: Feb 22, 2017)	Polymorphism	N
BRCA2	NM_000059.3(BRCA2):c.5414A>G (p.Asn1805Ser)	VAR_008780	51858	Breast-ovarian cancer, familial 2|Hereditary breast and ovarian cancer syndrome|Hereditary cancer-predisposing syndrome|not specified	Uncertain significance(Last reviewed: Feb 08, 2017)	Polymorphism	N
BRCA2	NM_000059.3(BRCA2):c.8503T>C (p.Ser2835Pro)	VAR_018915	52606	Breast-ovarian cancer, familial 2|Hereditary breast and ovarian cancer syndrome|Hereditary cancer-predisposing syndrome|not specified	Benign/Likely benign(Last reviewed: Jan 26, 2017)	Polymorphism	Y
BRCA2	NM_000059.3(BRCA2):c.2803G>A (p.Asp935Asn)	VAR_008772	51349	Breast-ovarian cancer, familial 2|Fanconi anemia|Hereditary breast and ovarian cancer syndrome|Hereditary cancer-predisposing syndrome|not specified	Benign/Likely benign(Last reviewed: Mar 10, 2017)	Unclassified	N
BRIP1	NM_032043.2(BRIP1):c.1899C>G (p.Ile633Met)	VAR_052192	231114	Familial cancer of breast|Fanconi anemia, complementation group J|Hereditary cancer-predisposing syndrome	Uncertain significance(Last reviewed: Dec 05, 2016)	Polymorphism	N
BRIP1	NM_032043.2(BRIP1):c.1619A>T (p.Gln540Leu)	VAR_020903	142473	Familial cancer of breast|Fanconi anemia, complementation group J|Hereditary cancer-predisposing syndrome|not specified	Uncertain significance(Last reviewed: May 08, 2017)	Polymorphism	N
BRIP1	NM_032043.2(BRIP1):c.1591T>G (p.Phe531Val)	VAR_020902	219552	Familial cancer of breast|Fanconi anemia, complementation group J|not specified	Uncertain significance(Last reviewed: Aug 30, 2016)	Polymorphism	N
BRIP1	NM_032043.2(BRIP1):c.2804T>G (p.Val935Gly)	VAR_020906	133757	Familial cancer of breast|Fanconi anemia, complementation group J|Hereditary cancer-predisposing syndrome|not specified	Uncertain significance(Last reviewed: Oct 06, 2016)	Polymorphism	N
BRIP1	NM_032043.2(BRIP1):c.790C>T (p.Arg264Trp)	VAR_023701	128195	Familial cancer of breast|Fanconi anemia, complementation group J|Fanconi anemia, complementation group J|Hereditary cancer-predisposing syndrome|Neoplasm of ovary|not specified	Likely benign(Last reviewed: Jun 07, 2017)	Polymorphism	Y
BRIP1	NM_032043.2(BRIP1):c.517C>T (p.Arg173Cys)	VAR_020897	133761	Familial cancer of breast|Fanconi anemia, complementation group J|Fanconi anemia, complementation group J|Hereditary cancer-predisposing syndrome|Neoplasm of ovary|not provided|not specified	Benign/Likely benign(Last reviewed: May 08, 2017)	Polymorphism	Y
BRIP1	NM_032043.2(BRIP1):c.577G>A (p.Val193Ile)	VAR_020898	128192	Familial cancer of breast|Fanconi anemia, complementation group J|Fanconi anemia, complementation group J|Hereditary cancer-predisposing syndrome|Neoplasm of ovary|not specified	Benign/Likely benign(Last reviewed: Jul 04, 2017)	Polymorphism	Y
BRIP1	NM_032043.2(BRIP1):c.584T>C (p.Leu195Pro)	VAR_020899	128193	Familial cancer of breast|Fanconi anemia, complementation group J|Fanconi anemia, complementation group J|Hereditary cancer-predisposing syndrome|Neoplasm of ovary|not specified	Benign/Likely benign(Last reviewed: May 16, 2017)	Polymorphism	Y
BSCL2	NM_032667.6(BSCL2):c.263A>G (p.Asn88Ser)	VAR_022375	4543	Charcot-Marie-Tooth disease, type 2|Distal hereditary motor neuronopathy type 5|Silver spastic paraplegia syndrome|not provided|not specified	Pathogenic(Last reviewed: Sep 19, 2016)	Disease	Y
BSCL2	NM_032667.6(BSCL2):c.263A>G (p.Asn88Ser)	VAR_022375	4543	Charcot-Marie-Tooth disease, type 2|Distal hereditary motor neuronopathy type 5|Silver spastic paraplegia syndrome|not provided|not specified	Pathogenic(Last reviewed: Sep 19, 2016)	Disease	Y
BSND	NM_057176.2(BSND):c.127G>A (p.Val43Ile)	VAR_061564	46545	Bartter's syndrome|not specified	Benign/Likely benign(Last reviewed: Jun 14, 2016)	Polymorphism	Y
BTD	NM_000060.4(BTD):c.1595C>T (p.Thr532Met)	VAR_005120	1897	Biotinidase deficiency|not provided	Pathogenic(Last reviewed: Jun 16, 2016)	Disease	Y
BTD	NM_000060.4(BTD):c.1368A>C (p.Gln456His)	VAR_005119	1902	Biotinidase deficiency|not provided	Pathogenic(Last reviewed: Mar 24, 2017)	Disease	Y
BTD	NM_000060.4(BTD):c.1612C>T (p.Arg538Cys)	VAR_005121	1898	Biotinidase deficiency|not provided	Pathogenic(Last reviewed: Jun 10, 2016)	Disease	Y
BTD	NM_000060.4(BTD):c.1171C>T (p.Pro391Ser)	VAR_056238	38570	Biotinidase deficiency|Biotinidase deficiency|not specified	Benign/Likely benign(Last reviewed: Feb 22, 2017)	Polymorphism	Y
BUB1B	NM_001211.5(BUB1B):c.1853T>C (p.Val618Ala)	VAR_008854	133769	Mosaic variegated aneuploidy syndrome 1|not specified	Benign(Last reviewed: Jan 11, 2017)	Unclassified	N
C19orf12	NM_001031726.3(C19orf12):c.187G>C (p.Ala63Pro)	VAR_070668	88865	Neurodegeneration with brain iron accumulation 4|Spastic paraplegia 43, autosomal recessive|not provided	Pathogenic/Likely pathogenic(Last reviewed: May 22, 2017)	Disease	Y
C19orf12	NM_001031726.3(C19orf12):c.187G>C (p.Ala63Pro)	VAR_070668	88865	Neurodegeneration with brain iron accumulation 4|Spastic paraplegia 43, autosomal recessive|not provided	Pathogenic/Likely pathogenic(Last reviewed: May 22, 2017)	Disease	Y
C19orf12	NM_001031726.3(C19orf12):c.32C>T (p.Thr11Met)	VAR_066617	31156	Neurodegeneration with brain iron accumulation 4|not provided	Pathogenic(Last reviewed: Jun 14, 2016)	Disease	Y
C19orf12	NM_001031726.3(C19orf12):c.425A>C (p.Lys142Thr)	VAR_066622	128538	Neurodegeneration with brain iron accumulation 4|Spastic paraplegia 43, autosomal recessive|not specified	Benign/Likely benign(Last reviewed: Dec 28, 2016)	Polymorphism	Y
C1QTNF5;MFRP	NM_031433.3(MFRP):c.406G>A (p.Val136Met)	VAR_025693	167299	Microphthalmia, isolated 6|Retinal degeneration|not specified	Benign/Likely benign(Last reviewed: Jun 14, 2016)	Polymorphism	Y
C2;CFB	NM_001710.5(CFB):c.1598A>G (p.Lys533Arg)	VAR_063664	225313	Atypical hemolytic uremic syndrome|Complement component 2 deficiency|Complement factor B deficiency|Macular degeneration|not provided|not specified	Benign/Likely benign(Last reviewed: Feb 09, 2017)	Disease	N
C2;CFB	NM_001710.5(CFB):c.95G>A (p.Arg32Gln)	VAR_006494	16075	Age-related macular degeneration 14|Atypical hemolytic uremic syndrome|BF*FA/S|Complement component 2 deficiency|Factor B fast/slow polymorphism|Macular degeneration|not specified	Benign/Likely benign, protective(Last reviewed: Oct 30, 2017)	Polymorphism	Y
C2orf71	NM_001029883.2(C2orf71):c.958C>T (p.Arg320Cys)	VAR_065272	281380	Retinitis Pigmentosa, Recessive|not specified	Uncertain significance(Last reviewed: Jun 14, 2016)	Polymorphism	N
C2orf71	NM_001029883.2(C2orf71):c.1739C>T (p.Thr580Met)	VAR_042648	335655	Retinitis Pigmentosa, Recessive|not specified	Benign/Likely benign(Last reviewed: Oct 17, 2016)	Polymorphism	Y
C2orf71	NM_001029883.2(C2orf71):c.2374C>G (p.Leu792Val)	VAR_042649	287769	Retinitis Pigmentosa, Recessive|not specified	Benign/Likely benign(Last reviewed: Jun 14, 2016)	Polymorphism	Y
C2orf71	NM_001029883.2(C2orf71):c.3739G>A (p.Gly1247Ser)	VAR_065288	195107	not provided|not specified	Benign/Likely benign(Last reviewed: May 30, 2017)	Polymorphism	Y
C5orf42	NM_023073.3(C5orf42):c.6098T>G (p.Phe2033Cys)	VAR_042949	158048	Joubert syndrome|not specified	Benign/Likely benign(Last reviewed: Jun 14, 2016)	Polymorphism	Y
C5orf42	NM_023073.3(C5orf42):c.7775C>T (p.Pro2592Leu)	VAR_042951	158052	Joubert syndrome|not specified	Benign/Likely benign(Last reviewed: Oct 03, 2016)	Polymorphism	Y
C5orf42	NM_023073.3(C5orf42):c.4310T>C (p.Ile1437Thr)	VAR_042948	158036	Joubert syndrome|not specified	Benign/Likely benign(Last reviewed: Jun 14, 2016)	Polymorphism	Y
C5orf42	NM_023073.3(C5orf42):c.6427A>G (p.Ile2143Val)	VAR_042950	158049	Joubert syndrome|not specified	Benign/Likely benign(Last reviewed: Jun 14, 2016)	Polymorphism	Y
C5orf42	NM_023073.3(C5orf42):c.5381C>T (p.Pro1794Leu)	VAR_068166	158040	Joubert syndrome|not specified	Benign/Likely benign(Last reviewed: Jun 14, 2016)	Polymorphism	Y
C5orf42	NM_023073.3(C5orf42):c.9184G>A (p.Gly3062Arg)	VAR_042952	158060	Joubert syndrome|not specified	Benign/Likely benign(Last reviewed: Oct 03, 2016)	Polymorphism	Y
C5orf42	NM_023073.3(C5orf42):c.5314A>G (p.Ser1772Gly)	VAR_076780	158038	Joubert syndrome|not provided|not specified	Benign/Likely benign(Last reviewed: Dec 30, 2016)	Polymorphism	Y
C5orf42	NM_023073.3(C5orf42):c.3599C>T (p.Ala1200Val)	VAR_077558	217591	Joubert syndrome 17|not provided	Pathogenic(Last reviewed: May 06, 2016)	Unclassified	N
CACNA1A	NM_001127221.1(CACNA1A):c.1997C>T (p.Thr666Met)	VAR_001492	8488	Episodic ataxia type 2|Familial hemiplegic migraine type 1|Migraine, sporadic hemiplegic, with progressive cerebellar ataxia	Pathogenic(Last reviewed: Aug 30, 2016)	Disease	Y
CACNA1A	NM_001127221.1(CACNA1A):c.1997C>T (p.Thr666Met)	VAR_001492	8488	Episodic ataxia type 2|Familial hemiplegic migraine type 1|Migraine, sporadic hemiplegic, with progressive cerebellar ataxia	Pathogenic(Last reviewed: Aug 30, 2016)	Disease	Y
CACNA1A	NM_001127221.1(CACNA1A):c.4991G>A (p.Arg1664Gln)	VAR_063691	68432	Chronic and progressive ataxia|Enlarged cisterna magna|Global developmental delay|Spinocerebellar ataxia 6|not provided	Pathogenic/Likely pathogenic(Last reviewed: Sep 19, 2016)	Disease	Y
CACNA1A	NM_001127221.1(CACNA1A):c.2740C>T (p.Pro914Ser)	VAR_014458	128548	not provided|not specified	Benign/Likely benign(Last reviewed: May 03, 2017)	Polymorphism	Y
CACNA1A	NM_001127221.1(CACNA1A):c.2754G>C (p.Glu918Asp)	VAR_014459	68426	not provided|not specified	Benign/Likely benign(Last reviewed: Jan 05, 2016)	Polymorphism	Y
CACNA1A	NM_001127221.1(CACNA1A):c.2978A>T (p.Glu993Val)	VAR_043828	68427	not provided|not specified	Benign/Likely benign(Last reviewed: Jan 05, 2016)	Polymorphism	Y
CACNA1A	NM_001127221.1(CACNA1A):c.3313G>A (p.Gly1105Ser)	VAR_014462	68428	not provided|not specified	Benign/Likely benign(Last reviewed: Apr 04, 2016)	Polymorphism	Y
CACNA1A	NM_001127221.1(CACNA1A):c.1360G>A (p.Ala454Thr)	VAR_063686	68420	not provided|not specified	Benign/Likely benign(Last reviewed: Oct 31, 2016)	Polymorphism	Y
CACNA1F	NM_005183.3(CACNA1F):c.1903G>A (p.Val635Ile)	VAR_030812	259657	not specified	Likely benign(Last reviewed: Mar 29, 2016)	Disease	N
CACNA1F	NM_005183.3(CACNA1F):c.41C>T (p.Pro14Leu)	VAR_030807	166780	not specified	Benign(Last reviewed: Apr 16, 2014)	Polymorphism	Y
CACNA1S	NM_000069.2(CACNA1S):c.3716G>A (p.Arg1239His)	VAR_001502	17623	Hypokalemic periodic paralysis 1|not provided	Pathogenic(Last reviewed: Jun 17, 2016)	Disease	Y
CACNA1S	NM_000069.2(CACNA1S):c.5399T>C (p.Leu1800Ser)	VAR_046972	254847	Hypokalemic periodic paralysis|Malignant hyperthermia susceptibility|not specified	Benign(Last reviewed: Jun 14, 2016)	Polymorphism	Y
CACNA1S	NM_000069.2(CACNA1S):c.206C>G (p.Ala69Gly)	VAR_046970	254811	Hypokalemic periodic paralysis|Malignant hyperthermia susceptibility|not specified	Benign/Likely benign(Last reviewed: Jun 14, 2016)	Polymorphism	Y
CACNA1S	NM_000069.2(CACNA1S):c.1373T>A (p.Leu458His)	VAR_001498	254789	Hypokalemic periodic paralysis|Malignant hyperthermia susceptibility|not specified	Benign(Last reviewed: Jun 14, 2016)	Polymorphism	Y
CACNA1S	NM_000069.2(CACNA1S):c.4973G>A (p.Arg1658His)	VAR_046971	254842	Hypokalemic periodic paralysis|Malignant hyperthermia susceptibility|not specified	Benign(Last reviewed: Jun 14, 2016)	Polymorphism	Y
CACNA1S	NM_000069.2(CACNA1S):c.4615C>T (p.Arg1539Cys)	VAR_001503	197021	Hypokalemic periodic paralysis|Malignant hyperthermia susceptibility|not specified	Benign(Last reviewed: Jun 14, 2016)	Polymorphism	Y
CACNA2D4	NM_172364.4(CACNA2D4):c.979A>G (p.Ile327Val)	VAR_035049	262820	Cone dystrophy 3|not specified	Benign(Last reviewed: Jun 14, 2016)	Polymorphism	Y
CALR3	NM_145046.4(CALR3):c.850G>A (p.Asp284Asn)	VAR_048589	192182	Familial hypertrophic cardiomyopathy 19|not provided|not specified	Benign(Last reviewed: Feb 07, 2017)	Polymorphism	Y
CALR3	NM_145046.4(CALR3):c.820G>A (p.Val274Ile)	VAR_027946	192183	Familial hypertrophic cardiomyopathy 19|not specified	Benign(Last reviewed: Jan 17, 2017)	Polymorphism	Y
CANT1	NM_138793.3(CANT1):c.967G>A (p.Ala323Thr)	VAR_068661	325697	Desbuquois Dysplasia|not provided	Likely benign(Last reviewed: Jun 14, 2017)	Polymorphism	Y
CAPN3	NM_000070.2(CAPN3):c.551C>T (p.Thr184Met)	VAR_009558	128572	not specified	Benign/Likely benign(Last reviewed: Jul 28, 2016)	Disease	N
CAPN3	NM_000070.2(CAPN3):c.1715G>A (p.Arg572Gln)	VAR_001368	17614	Limb-girdle muscular dystrophy, type 2A	Pathogenic(Last reviewed: Sep 14, 2016)	Disease	Y
CAPN3	NM_000070.2(CAPN3):c.956C>T (p.Pro319Leu)	VAR_009569	17617	Limb-girdle muscular dystrophy, type 2A|not provided	Pathogenic/Likely pathogenic(Last reviewed: Jan 14, 2016)	Disease	Y
CAPN3	NM_000070.2(CAPN3):c.1469G>A (p.Arg490Gln)	VAR_009584	17622	CAPN3-Related Disorders|Limb-girdle muscular dystrophy, type 2A	Pathogenic(Last reviewed: Jun 14, 2016)	Disease	Y
CAPN3	NM_000070.2(CAPN3):c.1468C>T (p.Arg490Trp)	VAR_001367	166790	Limb-girdle muscular dystrophy, type 2A|not provided	Pathogenic(Last reviewed: Jun 27, 2017)	Disease	Y
CAPN3	NM_000070.2(CAPN3):c.2243G>A (p.Arg748Gln)	VAR_009598	128570	Limb-girdle muscular dystrophy, type 2A|not provided	Pathogenic/Likely pathogenic(Last reviewed: May 18, 2017)	Disease	Y
CAPN3	NM_000070.2(CAPN3):c.1342C>T (p.Arg448Cys)	VAR_009577	280038	Limb-girdle muscular dystrophy, type 2A|not provided	Pathogenic(Last reviewed: Dec 18, 2015)	Disease	Y
CAPN3	NM_000070.2(CAPN3):c.1343G>A (p.Arg448His)	VAR_009579	217149	Limb-girdle muscular dystrophy, type 2A	Pathogenic(Last reviewed: Sep 18, 2016)	Disease	Y
CAPN3	NM_000070.2(CAPN3):c.1465C>T (p.Arg489Trp)	VAR_009583	217150	Limb-girdle muscular dystrophy, type 2A	Pathogenic(Last reviewed: Sep 04, 2015)	Disease	Y
CAPN3	NM_000070.2(CAPN3):c.1714C>T (p.Arg572Trp)	VAR_009590	217152	Limb-girdle muscular dystrophy, type 2A	Pathogenic(Last reviewed: Oct 05, 2015)	Disease	Y
CAPN3	NM_000070.2(CAPN3):c.479C>G (p.Ala160Gly)	VAR_015389	92417	Limb-Girdle Muscular Dystrophy, Recessive|Limb-girdle muscular dystrophy, type 2A|not specified	Benign/Likely benign(Last reviewed: Jul 07, 2016)	Polymorphism	Y
CAPN3	NM_000070.2(CAPN3):c.706G>A (p.Ala236Thr)	VAR_009567	92420	Limb-Girdle Muscular Dystrophy, Recessive|Limb-girdle muscular dystrophy, type 2A|not specified	Benign(Last reviewed: Jun 14, 2016)	Polymorphism	Y
CAPN3	NM_000070.2(CAPN3):c.319G>A (p.Glu107Lys)	VAR_009553	195011	not specified	Benign/Likely benign(Last reviewed: Jan 25, 2016)	Polymorphism	Y
CARD9	NM_052813.4(CARD9):c.35G>A (p.Ser12Asn)	VAR_048607	365858	Familial Candidiasis, Recessive|not specified	Benign(Last reviewed: Jun 14, 2016)	Polymorphism	Y
CASP10	NM_032977.3(CASP10):c.1216A>T (p.Ile406Leu)	VAR_037429	7769	Autoimmune lymphoproliferative syndrome|not provided	Likely benign(Last reviewed: Jan 06, 2017)	Polymorphism	Y
CASQ2	NM_001232.3(CASQ2):c.226G>A (p.Val76Met)	VAR_023693	44162	Cardiovascular phenotype|Catecholaminergic polymorphic ventricular tachycardia|not specified	Benign/Likely benign(Last reviewed: Jan 15, 2017)	Polymorphism	Y
CASQ2	NM_001232.3(CASQ2):c.196A>G (p.Thr66Ala)	VAR_023692	44160	Cardiovascular phenotype|Catecholaminergic polymorphic ventricular tachycardia|not specified	Benign(Last reviewed: Jun 14, 2016)	Polymorphism	Y
CASR	NM_000388.3(CASR):c.554G>A (p.Arg185Gln)	VAR_003593	8314	Hypocalciuric hypercalcemia, familial, type 1|Neonatal severe hyperparathyroidism|not provided	Pathogenic(Last reviewed: Sep 20, 2016)	Disease	Y
CASR	NM_000388.3(CASR):c.748G>A (p.Glu250Lys)	VAR_058061	196262	Familial hypocalciuric hypercalcemia|Hypocalcemia|Hypocalcemia, autosomal dominant 1|Hypocalciuric hypercalcemia, familial, type 1|Hypoparathyroidism familial isolated|Neonatal severe hyperparathyroidism|not provided|not specified	Benign/Likely benign(Last reviewed: May 31, 2017)	Polymorphism	Y
CAV3	NM_033337.2(CAV3):c.80G>A (p.Arg27Gln)	VAR_011512	8283	Creatine phosphokinase, elevated serum|Distal myopathy, Tateyama type|Limb-girdle muscular dystrophy, type 1C|Rippling muscle disease|Rippling muscle disease 2|not provided	Pathogenic(Last reviewed: Oct 25, 2016)	Disease	Y
CAV3	NM_033337.2(CAV3):c.80G>A (p.Arg27Gln)	VAR_011512	8283	Creatine phosphokinase, elevated serum|Distal myopathy, Tateyama type|Limb-girdle muscular dystrophy, type 1C|Rippling muscle disease|Rippling muscle disease 2|not provided	Pathogenic(Last reviewed: Oct 25, 2016)	Disease	Y
CAV3	NM_033337.2(CAV3):c.80G>A (p.Arg27Gln)	VAR_011512	8283	Creatine phosphokinase, elevated serum|Distal myopathy, Tateyama type|Limb-girdle muscular dystrophy, type 1C|Rippling muscle disease|Rippling muscle disease 2|not provided	Pathogenic(Last reviewed: Oct 25, 2016)	Disease	Y
CAV3	NM_033337.2(CAV3):c.80G>A (p.Arg27Gln)	VAR_011512	8283	Creatine phosphokinase, elevated serum|Distal myopathy, Tateyama type|Limb-girdle muscular dystrophy, type 1C|Rippling muscle disease|Rippling muscle disease 2|not provided	Pathogenic(Last reviewed: Oct 25, 2016)	Disease	Y
CAV3	NM_033337.2(CAV3):c.277G>A (p.Ala93Thr)	VAR_016208	8285	Long QT syndrome|Rippling muscle disease 2, autosomal recessive|not provided	Pathogenic/Likely pathogenic(Last reviewed: Nov 13, 2016)	Disease	Y
CBL	NM_005188.3(CBL):c.1100A>C (p.Gln367Pro)	VAR_064332	13807	Noonan syndrome-like disorder with or without juvenile myelomonocytic leukemia|not provided	Pathogenic(Last reviewed: Apr 11, 2016)	Disease	Y
CBL	NM_005188.3(CBL):c.2710G>A (p.Val904Ile)	VAR_057213	133813	Noonan-Like Syndrome Disorder|Rasopathy|not provided|not specified	Benign/Likely benign(Last reviewed: Jul 19, 2017)	Polymorphism	Y
CBL	NM_005188.3(CBL):c.1858C>T (p.Leu620Phe)	VAR_057211	45203	Noonan-Like Syndrome Disorder|Rasopathy|not specified	Benign/Likely benign(Last reviewed: Jan 03, 2017)	Polymorphism	Y
CBS	NM_000071.2(CBS):c.304A>C (p.Lys102Gln)	VAR_008052	136677	Homocystinuria|Homocystinuria due to CBS deficiency|not provided|not specified	Benign/Likely benign(Last reviewed: Jan 22, 2017)	Disease	N
CBS	NM_000071.2(CBS):c.919G>A (p.Gly307Ser)	VAR_002186	117	HYPERHOMOCYSTEINEMIA, THROMBOTIC, CBS-RELATED|Homocystinuria|Homocystinuria due to CBS deficiency|Homocystinuria, pyridoxine-nonresponsive|not provided	Pathogenic(Last reviewed: Jul 19, 2017)	Disease	Y
CBS	NM_000071.2(CBS):c.341C>T (p.Ala114Val)	VAR_002174	119	Homocystinuria due to CBS deficiency|Homocystinuria, pyridoxine-responsive|not provided	Pathogenic/Likely pathogenic(Last reviewed: Sep 16, 2016)	Disease	Y
CBS	NM_000071.2(CBS):c.430G>A (p.Glu144Lys)	VAR_002177	122	Homocystinuria due to CBS deficiency|Homocystinuria, pyridoxine-responsive	Pathogenic/Likely pathogenic(Last reviewed: Nov 18, 2015)	Disease	Y
CBS	NM_000071.2(CBS):c.1058C>T (p.Thr353Met)	VAR_008082	131	Homocystinuria due to CBS deficiency|Homocystinuria, pyridoxine-nonresponsive|Thoracic aortic aneurysm and aortic dissection|not provided	Pathogenic/Likely pathogenic(Last reviewed: Jul 18, 2017)	Disease	Y
CBS	NM_000071.2(CBS):c.146C>T (p.Pro49Leu)	VAR_008049	212872	Homocystinuria due to CBS deficiency|Thoracic aortic aneurysm and aortic dissection|not provided	Pathogenic/Likely pathogenic(Last reviewed: Jun 01, 2017)	Disease	Y
CBS	NM_000071.2(CBS):c.785C>T (p.Thr262Met)	VAR_008072	198988	Homocystinuria due to CBS deficiency|not provided	Pathogenic/Likely pathogenic(Last reviewed: Sep 12, 2016)	Disease	Y
CBS	NM_000071.2(CBS):c.1330G>A (p.Asp444Asn)	VAR_002192	126	HYPERHOMOCYSTEINEMIA, THROMBOTIC, CBS-RELATED|Homocystinuria due to CBS deficiency|Homocystinuria, pyridoxine-responsive|not provided	Pathogenic(Last reviewed: Jul 19, 2017)	Disease	Y
CBS	NM_000071.2(CBS):c.1111G>A (p.Val371Met)	VAR_002190	212862	Homocystinuria due to CBS deficiency|not provided	Pathogenic/Likely pathogenic(Last reviewed: Aug 05, 2016)	Disease	Y
CBS	NM_000071.2(CBS):c.1006C>T (p.Arg336Cys)	VAR_002188	92423	Homocystinuria due to CBS deficiency|not provided	Pathogenic(Last reviewed: Mar 16, 2017)	Disease	Y
CBS	NM_000071.2(CBS):c.833T>C (p.Ile278Thr)	VAR_002184	120	HYPERHOMOCYSTEINEMIA, THROMBOTIC, CBS-RELATED|Homocystinuria|Homocystinuria due to CBS deficiency|Homocystinuria, pyridoxine-responsive|Thoracic aortic aneurysm and aortic dissection|not provided|not specified	Pathogenic(Last reviewed: Jul 19, 2017)	Disease	Y
CBS	NM_000071.2(CBS):c.770C>T (p.Thr257Met)	VAR_002183	188927	Homocystinuria due to CBS deficiency|not provided	Pathogenic/Likely pathogenic(Last reviewed: Sep 09, 2014)	Disease	Y
CBS	NM_000071.2(CBS):c.1136G>A (p.Arg379Gln)	VAR_021801	188825	Homocystinuria due to CBS deficiency|not provided	Pathogenic/Likely pathogenic(Last reviewed: Aug 03, 2015)	Disease	Y
CBS	NM_000071.2(CBS):c.1039G>A (p.Gly347Ser)	VAR_021798	188801	Homocystinuria due to CBS deficiency|not provided	Pathogenic/Likely pathogenic(Last reviewed: Jun 29, 2015)	Disease	Y
CBS	NM_000071.2(CBS):c.325T>C (p.Cys109Arg)	VAR_021792	212878	Thoracic aortic aneurysm and aortic dissection|not provided	Pathogenic(Last reviewed: Sep 09, 2014)	Disease	Y
CBS	NM_000071.2(CBS):c.1643G>A (p.Arg548Gln)	VAR_046938	212869	Homocystinuria due to CBS deficiency|Thoracic aortic aneurysm and aortic dissection|not specified	Benign/Likely benign(Last reviewed: Jun 22, 2017)	Polymorphism	Y
CBS	NM_000071.2(CBS):c.52C>T (p.Arg18Cys)	VAR_046921	263858	Homocystinuria due to CBS deficiency|Thoracic aortic aneurysm and aortic dissection|not specified	Benign/Likely benign(Last reviewed: Oct 25, 2016)	Polymorphism	Y
CC2D2A	NM_001080522.2(CC2D2A):c.4582C>T (p.Arg1528Cys)	VAR_055323	744	Joubert syndrome 9|not provided	Pathogenic/Likely pathogenic(Last reviewed: Oct 13, 2016)	Disease	Y
CC2D2A	NM_001080522.2(CC2D2A):c.4582C>T (p.Arg1528Cys)	VAR_055323	744	Joubert syndrome 9|not provided	Pathogenic/Likely pathogenic(Last reviewed: Oct 13, 2016)	Disease	Y
CC2D2A	NM_001080522.2(CC2D2A):c.1127A>C (p.Glu376Ala)	VAR_038489	126227	Joubert syndrome|Meckel-Gruber syndrome|not specified	Benign/Likely benign(Last reviewed: Jun 14, 2016)	Polymorphism	Y
CC2D2A	NM_001080522.2(CC2D2A):c.1978G>A (p.Val660Ile)	VAR_038490	210608	not specified	Likely benign(Last reviewed: Sep 21, 2016)	Polymorphism	Y
CC2D2A	NM_001080522.2(CC2D2A):c.1519A>G (p.Lys507Glu)	VAR_076882	126228	Joubert syndrome|Meckel-Gruber syndrome|not provided|not specified	Benign/Likely benign(Last reviewed: Dec 29, 2016)	Unclassified	N
CCDC103	NM_213607.2(CCDC103):c.461A>C (p.His154Pro)	VAR_068449	31698	Ciliary dyskinesia, primary, 17|Kartagener syndrome|Primary ciliary dyskinesia	Pathogenic(Last reviewed: Dec 05, 2016)	Disease	Y
CCDC114	NM_144577.3(CCDC114):c.986G>A (p.Arg329His)	VAR_032501	262510	Primary ciliary dyskinesia|not specified	Benign(Last reviewed: Jan 20, 2017)	Polymorphism	Y
CCDC114	NM_144577.3(CCDC114):c.1403C>T (p.Pro468Leu)	VAR_032502	262489	not specified	Benign(Last reviewed: Mar 29, 2016)	Polymorphism	Y
CCDC39	NM_181426.1(CCDC39):c.1781C>T (p.Thr594Ile)	VAR_072468	242170	Primary ciliary dyskinesia|not specified	Uncertain significance(Last reviewed: Aug 14, 2016)	Unclassified	Y
CCDC50	NM_178335.2(CCDC50):c.363A>T (p.Leu121Phe)	VAR_050754	48154	not specified	Benign(Last reviewed: May 07, 2012)	Polymorphism	Y
CCDC78	NM_001031737.2(CCDC78):c.754T>C (p.Trp252Arg)	VAR_032867	128631	not specified	Benign(Last reviewed: Aug 15, 2013)	Polymorphism	Y
CCM2	NM_031443.3(CCM2):c.358G>A (p.Val120Ile)	VAR_023576	261971	not specified	Benign(Last reviewed: Jun 14, 2017)	Polymorphism	Y
CCM2	NM_031443.3(CCM2):c.157G>A (p.Val53Ile)	VAR_023575	261965	not specified	Benign(Last reviewed: Feb 24, 2017)	Polymorphism	Y
CCT5	NM_012073.4(CCT5):c.437A>T (p.Glu146Val)	VAR_052267	240840	Neuropathy, hereditary sensory, with spastic paraplegia, autosomal recessive|Sensory Neuropathy with Spastic Paraplegia|not specified	Benign/Likely benign(Last reviewed: Jan 05, 2017)	Polymorphism	Y
CD19	NM_001770.5(CD19):c.520C>G (p.Leu174Val)	VAR_026963	318803	Common Variable Immune Deficiency, Recessive|not specified	Benign(Last reviewed: Sep 27, 2016)	Polymorphism	Y
CD19	NM_001770.5(CD19):c.1541G>A (p.Arg514His)	VAR_036987	318811	Common Variable Immune Deficiency, Recessive|not specified	Benign/Likely benign(Last reviewed: Jul 26, 2016)	Polymorphism	Y
CD3G	NM_000073.2(CD3G):c.391G>T (p.Val131Phe)	VAR_049854	302685	Immunodeficiency due to defect in CD3-gamma|not specified	Benign/Likely benign(Last reviewed: Jun 14, 2016)	Polymorphism	Y
CD40	NM_001250.5(CD40):c.679C>G (p.Pro227Ala)	VAR_018752	338576	Immunodeficiency with Hyper-IgM|not specified	Benign/Likely benign(Last reviewed: Jul 01, 2016)	Polymorphism	Y
CDAN1	NM_138477.3(CDAN1):c.1787A>G (p.Gln596Arg)	VAR_056785	21747	Congenital dyserythropoietic anemia|Congenital dyserythropoietic anemia, type I|not specified	Benign(Last reviewed: Jun 14, 2016)	Polymorphism	Y
CDAN1	NM_138477.2(CDAN1):c.320A>T (p.Gln107Leu)	VAR_059602	21751	Congenital dyserythropoietic anemia|Congenital dyserythropoietic anemia, type I|not specified	Benign(Last reviewed: Jun 14, 2016)	Polymorphism	Y
CDAN1	NM_138477.2(CDAN1):c.2671C>T (p.Arg891Cys)	VAR_056786	21749	Congenital dyserythropoietic anemia|Congenital dyserythropoietic anemia, type I|not specified	Benign(Last reviewed: Jun 14, 2016)	Polymorphism	Y
CDC6	NM_001254.3(CDC6):c.712A>G (p.Thr238Ala)	VAR_019349	210621	not provided|not specified	Uncertain significance(Last reviewed: Apr 30, 2017)	Polymorphism	N
CDC6	NM_001254.3(CDC6):c.1321G>A (p.Val441Ile)	VAR_019353	128635	Meier-Gorlin syndrome|not specified	Benign/Likely benign(Last reviewed: Jun 14, 2016)	Polymorphism	Y
CDC6	NM_001254.3(CDC6):c.883G>A (p.Asp295Asn)	VAR_019350	128638	not specified	Benign(Last reviewed: Jun 21, 2013)	Polymorphism	Y
CDH1	NM_004360.4(CDH1):c.1178T>A (p.Ile393Asn)	VAR_048501	141828	Hereditary cancer-predisposing syndrome|Hereditary diffuse gastric cancer|not specified	Uncertain significance(Last reviewed: Jun 01, 2017)	Polymorphism	N
CDH1	NM_004360.4(CDH1):c.214G>A (p.Asp72Asn)	VAR_048500	136064	Hereditary cancer-predisposing syndrome|Hereditary diffuse gastric cancer|not specified	Uncertain significance(Last reviewed: Jan 27, 2017)	Polymorphism	N
CDH1	NM_004360.4(CDH1):c.1417G>A (p.Val473Ile)	VAR_048502	127914	Hereditary cancer-predisposing syndrome|Hereditary diffuse gastric cancer|not specified	Uncertain significance(Last reviewed: Mar 08, 2017)	Polymorphism	N
CDH1	NM_004360.4(CDH1):c.1888C>G (p.Leu630Val)	VAR_021868	133846	Hereditary cancer-predisposing syndrome|Hereditary diffuse gastric cancer|not specified	Benign/Likely benign(Last reviewed: Mar 31, 2017)	Polymorphism	Y
CDH1	NM_004360.4(CDH1):c.846G>A (p.Met282Ile)	VAR_033026	219957	Hereditary diffuse gastric cancer|not specified	Uncertain significance(Last reviewed: Jan 02, 2017)	Unclassified	Y
CDH1	NM_004360.4(CDH1):c.1793G>A (p.Arg598Gln)	VAR_001319	188221	Hereditary cancer-predisposing syndrome|Hereditary diffuse gastric cancer	Uncertain significance(Last reviewed: Nov 12, 2015)	Unclassified	Y
CDH23	NM_022124.5(CDH23):c.1096G>A (p.Ala366Thr)	VAR_024030	44114	not provided|not specified	Benign/Likely benign(Last reviewed: Sep 07, 2017)	Disease	N
CDH23	NM_022124.5(CDH23):c.6130G>A (p.Glu2044Lys)	VAR_012181	46002	Nonsyndromic Hearing Loss, Recessive|Retinitis pigmentosa-deafness syndrome|not specified	Benign/Likely benign(Last reviewed: Jun 14, 2016)	Polymorphism	Y
CDH23	NM_022124.5(CDH23):c.1487G>A (p.Ser496Asn)	VAR_012168	45875	Nonsyndromic Hearing Loss, Recessive|Retinitis pigmentosa-deafness syndrome|not specified	Benign/Likely benign(Last reviewed: Jun 14, 2016)	Polymorphism	Y
CDH23	NM_022124.5(CDH23):c.5996C>G (p.Thr1999Ser)	VAR_012180	45997	Nonsyndromic Hearing Loss, Recessive|Retinitis pigmentosa-deafness syndrome|not specified	Benign/Likely benign(Last reviewed: Jun 14, 2016)	Polymorphism	Y
CDH23	NM_022124.5(CDH23):c.1469G>C (p.Gly490Ala)	VAR_012167	45872	Nonsyndromic Hearing Loss, Recessive|Retinitis pigmentosa-deafness syndrome|not specified	Benign/Likely benign(Last reviewed: Jun 14, 2016)	Polymorphism	Y
CDH23	NM_022124.5(CDH23):c.4723G>A (p.Ala1575Thr)	VAR_012175	45955	Nonsyndromic Hearing Loss, Recessive|Retinitis pigmentosa-deafness syndrome|not specified	Benign/Likely benign(Last reviewed: Jun 14, 2016)	Polymorphism	Y
CDH23	NM_022124.5(CDH23):c.4051A>G (p.Asn1351Asp)	VAR_012173	45937	Nonsyndromic Hearing Loss, Recessive|Retinitis pigmentosa-deafness syndrome|not specified	Benign/Likely benign(Last reviewed: Jun 14, 2016)	Polymorphism	Y
CDH23	NM_022124.5(CDH23):c.5023G>A (p.Val1675Ile)	VAR_012177	45960	Nonsyndromic Hearing Loss, Recessive|Retinitis pigmentosa-deafness syndrome|not provided|not specified	Benign/Likely benign(Last reviewed: Jun 14, 2016)	Polymorphism	Y
CDH23	NM_022124.5(CDH23):c.5411G>A (p.Arg1804Gln)	VAR_012179	45978	Nonsyndromic Hearing Loss, Recessive|Retinitis pigmentosa-deafness syndrome|not specified	Benign/Likely benign(Last reviewed: Jun 14, 2016)	Polymorphism	Y
CDH23	NM_022124.5(CDH23):c.3664G>A (p.Ala1222Thr)	VAR_012170	45927	not specified	Benign(Last reviewed: Sep 23, 2013)	Polymorphism	Y
CDH23	NM_022124.5(CDH23):c.4045C>T (p.Arg1349Cys)	VAR_012172	45936	not specified	Benign(Last reviewed: Sep 22, 2015)	Polymorphism	Y
CDH23	NM_022124.5(CDH23):c.4858G>A (p.Val1620Met)	VAR_027330	45957	not specified	Benign(Last reviewed: Nov 20, 2013)	Polymorphism	Y
CDH23	NM_022124.5(CDH23):c.6847G>A (p.Val2283Ile)	VAR_027337	46019	Nonsyndromic Hearing Loss, Recessive|Retinitis pigmentosa-deafness syndrome|not provided|not specified	Benign/Likely benign(Last reviewed: Jun 14, 2016)	Polymorphism	Y
CDH23	NM_022124.5(CDH23):c.7073G>A (p.Arg2358Gln)	VAR_012184	46026	Nonsyndromic Hearing Loss, Recessive|Retinitis pigmentosa-deafness syndrome|not specified	Benign/Likely benign(Last reviewed: Jun 14, 2016)	Polymorphism	Y
CDH23	NM_022124.5(CDH23):c.7139C>T (p.Pro2380Leu)	VAR_012185	46028	Nonsyndromic Hearing Loss, Recessive|Retinitis pigmentosa-deafness syndrome|not specified	Benign/Likely benign(Last reviewed: Jun 14, 2016)	Polymorphism	Y
CDH23	NM_022124.5(CDH23):c.4310G>A (p.Arg1437Gln)	VAR_027327	45944	not provided|not specified	Benign(Last reviewed: Feb 14, 2013)	Polymorphism	Y
CDH23	NM_022124.5(CDH23):c.7C>T (p.Arg3Cys)	VAR_012166	46042	Nonsyndromic Hearing Loss, Recessive|Retinitis pigmentosa-deafness syndrome|not provided|not specified	Benign/Likely benign(Last reviewed: Jun 14, 2016)	Polymorphism	Y
CDH23;PSAP	NM_022124.5(CDH23):c.9373T>C (p.Phe3125Leu)	VAR_012190	46072	Atypical Gaucher Disease|Combined saposin deficiency|Galactosylceramide beta-galactosidase deficiency|Metachromatic leukodystrophy|Nonsyndromic Hearing Loss, Recessive|Retinitis pigmentosa-deafness syndrome|not provided|not specified	Benign/Likely benign(Last reviewed: Jun 14, 2016)	Polymorphism	Y
CDHR1	NM_033100.3(CDHR1):c.728C>T (p.Ala243Val)	VAR_038746	262218	Cone-Rod Dystrophy, Recessive|not specified	Benign/Likely benign(Last reviewed: Oct 17, 2016)	Polymorphism	Y
CDK13	NM_003718.4(CDK13):c.2525A>G (p.Asn842Ser)	VAR_078601	235887	Congenital heart defects, dysmorphic facial features, and intellectual developmental disorder|not provided	Pathogenic(Last reviewed: May 11, 2017)	Disease	Y
CDK4	NM_000075.3(CDK4):c.122A>G (p.Asn41Ser)	VAR_021152	135822	Hereditary cutaneous melanoma|not specified	Uncertain significance(Last reviewed: Feb 18, 2017)	Disease	N
CDK4	NM_000075.3(CDK4):c.70C>T (p.Arg24Cys)	VAR_006200	16928	Adenocarcinoma of lung|Cutaneous malignant melanoma 3|Hereditary cutaneous melanoma|Malignant melanoma of skin|Multiple myeloma|not provided	Pathogenic/Likely pathogenic, risk factor(Last reviewed: May 31, 2016)	Disease	Y
CDK4	NM_000075.3(CDK4):c.245G>A (p.Arg82Gln)	VAR_029153	219640	Hereditary cutaneous melanoma|not specified	Uncertain significance(Last reviewed: Jun 01, 2016)	Polymorphism	N
CDK5RAP2	NM_018249.5(CDK5RAP2):c.4821G>C (p.Arg1607Ser)	VAR_056832	158154	Primary Microcephaly, Recessive|not specified	Benign/Likely benign(Last reviewed: Jun 14, 2016)	Polymorphism	Y
CDK5RAP2	NM_018249.5(CDK5RAP2):c.3134G>C (p.Arg1045Thr)	VAR_032426	21646	Primary Microcephaly, Recessive|Primary autosomal recessive microcephaly 3|not specified	Benign/Likely benign(Last reviewed: Jun 14, 2016)	Polymorphism	Y
CDK5RAP2	NM_018249.5(CDK5RAP2):c.865G>C (p.Glu289Gln)	VAR_017443	21657	Primary Microcephaly, Recessive|Primary autosomal recessive microcephaly 3|not specified	Benign/Likely benign(Last reviewed: Jun 14, 2016)	Polymorphism	Y
CDK5RAP2	NM_018249.5(CDK5RAP2):c.4618G>C (p.Val1540Leu)	VAR_017444	21651	Primary Microcephaly, Recessive|Primary autosomal recessive microcephaly 3|not specified	Benign/Likely benign(Last reviewed: Jun 14, 2016)	Polymorphism	Y
CDKL5	NM_003159.2(CDKL5):c.533G>A (p.Arg178Gln)	VAR_071103	94113	Early infantile epileptic encephalopathy 2|not provided	Pathogenic/Likely pathogenic(Last reviewed: Apr 14, 2017)	Disease	Y
CDKL5	NM_003159.2(CDKL5):c.587C>T (p.Ser196Leu)	VAR_078219	143827	Early infantile epileptic encephalopathy 2|Epileptic encephalopathy|not provided	Pathogenic/Likely pathogenic(Last reviewed: Nov 16, 2016)	Disease	Y
CDKL5	NM_003159.2(CDKL5):c.2372A>C (p.Gln791Pro)	VAR_023562	136713	Angelman syndrome-like|Early infantile epileptic encephalopathy 2|not specified	Benign(Last reviewed: Jan 05, 2017)	Polymorphism	Y
CDKL5	NM_003159.2(CDKL5):c.2995G>A (p.Val999Met)	VAR_037637	94110	Angelman syndrome-like|Early infantile epileptic encephalopathy 2|not provided|not specified	Benign(Last reviewed: Dec 20, 2016)	Polymorphism	Y
CDKL5	NM_003159.2(CDKL5):c.1330C>T (p.Arg444Cys)	VAR_058031	143775	Angelman syndrome-like|Early infantile epileptic encephalopathy 2|not specified	Benign(Last reviewed: Aug 06, 2016)	Polymorphism	Y
CDKL5	NM_003159.2(CDKL5):c.2980G>A (p.Gly994Arg)	VAR_078220	375543	Angelman syndrome-like|Early infantile epileptic encephalopathy 2|Epileptic encephalopathy	Uncertain significance(Last reviewed: Nov 16, 2016)	Unclassified	Y
CDKN1B	NM_004064.4(CDKN1B):c.326T>G (p.Val109Gly)	VAR_011872	259226	Multiple endocrine neoplasia|not specified	Benign(Last reviewed: Jun 14, 2016)	Polymorphism	Y
CDKN2A	NM_000077.4(CDKN2A):c.159G>C (p.Met53Ile)	VAR_001424	9414	Cutaneous malignant melanoma 2|Hereditary cancer-predisposing syndrome|Hereditary cutaneous melanoma|not provided	Pathogenic, risk factor(Last reviewed: Jun 27, 2017)	Disease	Y
CDKN2A	NM_000077.4(CDKN2A):c.71G>C (p.Arg24Pro)	VAR_001414	9415	Cutaneous malignant melanoma 2|Hereditary cancer-predisposing syndrome|Hereditary cutaneous melanoma|Melanoma-pancreatic cancer syndrome|not provided	Pathogenic/Likely pathogenic, risk factor(Last reviewed: Feb 16, 2017)	Disease	Y
CDKN2A	NM_000077.4(CDKN2A):c.377T>A (p.Val126Asp)	VAR_001479	9420	Cutaneous malignant melanoma 2|Hereditary cancer-predisposing syndrome|Hereditary cutaneous melanoma|not provided	Pathogenic, risk factor(Last reviewed: Dec 15, 2016)	Disease	Y
CDKN2A	NM_000077.4(CDKN2A):c.176T>G (p.Val59Gly)	VAR_001427	9423	Cutaneous malignant melanoma 2|Hereditary cancer-predisposing syndrome|Melanoma-pancreatic cancer syndrome	Likely pathogenic, risk factor(Last reviewed: Sep 29, 2016)	Disease	Y
CDKN2A	NM_000077.4(CDKN2A):c.259C>T (p.Arg87Trp)	VAR_012317	406707	Hereditary cutaneous melanoma|not provided	Likely pathogenic(Last reviewed: Jan 12, 2017)	Disease	Y
CDKN2A	NM_000077.4(CDKN2A):c.370C>T (p.Arg124Cys)	VAR_053032	231362	Hereditary cancer-predisposing syndrome|Hereditary cutaneous melanoma|not specified	Uncertain significance(Last reviewed: Jan 02, 2017)	Polymorphism	N
CDKN2A	NM_000077.4(CDKN2A):c.320G>A (p.Arg107His)	VAR_001467	182413	Hereditary cancer-predisposing syndrome|Hereditary cutaneous melanoma|not specified	Uncertain significance(Last reviewed: Jun 17, 2016)	Polymorphism	N
CDKN2A	NM_000077.4(CDKN2A):c.442G>A (p.Ala148Thr)	VAR_001486	41580	Hereditary cancer-predisposing syndrome|Hereditary cutaneous melanoma|Melanoma-pancreatic cancer syndrome|not provided|not specified	Benign(Last reviewed: Jan 30, 2017)	Polymorphism	Y
CDKN2A	NM_000077.4(CDKN2A):c.379G>T (p.Ala127Ser)	VAR_001480	41578	Hereditary cancer-predisposing syndrome|Hereditary cutaneous melanoma|Melanoma-pancreatic cancer syndrome|not provided|not specified	Benign/Likely benign(Last reviewed: May 09, 2017)	Unclassified	N
CDKN2A	NM_000077.4(CDKN2A):c.250G>A (p.Asp84Asn)	VAR_001448	229806	Hereditary cancer-predisposing syndrome|Hereditary cutaneous melanoma	Uncertain significance(Last reviewed: Dec 21, 2016)	Unclassified	Y
CDON	NM_016952.4(CDON):c.2051C>G (p.Thr684Ser)	VAR_066497	303504	Holoprosencephaly|not provided	Likely benign(Last reviewed: May 09, 2017)	Disease	N
CDON	NM_016952.4(CDON):c.2057C>T (p.Ala686Val)	VAR_056041	260785	Holoprosencephaly|not specified	Benign/Likely benign(Last reviewed: Jun 14, 2016)	Polymorphism	Y
CDON	NM_016952.4(CDON):c.1051C>G (p.Pro351Ala)	VAR_056040	260781	Holoprosencephaly|not specified	Benign/Likely benign(Last reviewed: Jun 14, 2016)	Polymorphism	Y
CDON	NM_016952.4(CDON):c.484G>A (p.Glu162Lys)	VAR_056039	260800	Holoprosencephaly|not specified	Benign/Likely benign(Last reviewed: Jun 14, 2016)	Polymorphism	Y
CDT1	NM_030928.3(CDT1):c.1385G>A (p.Arg462Gln)	VAR_065491	30498	Meier-Gorlin syndrome 4|not provided	Pathogenic/Likely pathogenic(Last reviewed: Mar 14, 2017)	Disease	Y
CENPJ	NM_018451.4(CENPJ):c.163C>G (p.Pro55Ala)	VAR_032428	21659	Primary Microcephaly, Recessive|Primary autosomal recessive microcephaly 6|Seckel syndrome|not specified	Benign/Likely benign(Last reviewed: Jun 14, 2016)	Polymorphism	Y
CENPJ	NM_018451.4(CENPJ):c.2635T>G (p.Ser879Ala)	VAR_032432	21661	Primary Microcephaly, Recessive|Primary autosomal recessive microcephaly 6|Seckel syndrome|not specified	Benign/Likely benign(Last reviewed: Jun 14, 2016)	Polymorphism	Y
CENPJ	NM_018451.4(CENPJ):c.61A>G (p.Met21Val)	VAR_032427	21666	Primary Microcephaly, Recessive|Primary autosomal recessive microcephaly 6|Seckel syndrome|not specified	Benign(Last reviewed: Jun 14, 2016)	Polymorphism	Y
CENPJ	NM_018451.4(CENPJ):c.187G>C (p.Asp63His)	VAR_032429	21660	Primary Microcephaly, Recessive|Primary autosomal recessive microcephaly 6|Seckel syndrome|not specified	Benign/Likely benign(Last reviewed: Jun 14, 2016)	Polymorphism	Y
CENPJ	NM_018451.4(CENPJ):c.253C>A (p.Pro85Thr)	VAR_032430	158203	Primary Microcephaly, Recessive|Seckel syndrome|not specified	Benign/Likely benign(Last reviewed: Jun 14, 2016)	Polymorphism	Y
CEP152	NM_014985.3(CEP152):c.794A>C (p.Gln265Pro)	VAR_063813	55	Primary autosomal recessive microcephaly 9|not provided	Pathogenic/Likely pathogenic(Last reviewed: Feb 10, 2016)	Disease	Y
CEP152	NM_014985.3(CEP152):c.3317T>C (p.Val1106Ala)	VAR_050781	158254	Primary Microcephaly, Recessive|Seckel syndrome|not specified	Benign/Likely benign(Last reviewed: Jun 14, 2016)	Polymorphism	Y
CEP152	NM_014985.3(CEP152):c.2740C>G (p.Leu914Val)	VAR_050780	136723	Primary Microcephaly, Recessive|Seckel syndrome|not specified	Benign/Likely benign(Last reviewed: Jun 14, 2016)	Polymorphism	Y
CEP152	NM_014985.3(CEP152):c.2378G>T (p.Ser793Ile)	VAR_050779	136722	Primary Microcephaly, Recessive|Seckel syndrome|not specified	Benign/Likely benign(Last reviewed: Jun 14, 2016)	Polymorphism	Y
CEP152	NM_014985.3(CEP152):c.161C>T (p.Ser54Leu)	VAR_047932	136719	Primary Microcephaly, Recessive|Seckel syndrome|not specified	Benign/Likely benign(Last reviewed: Jun 14, 2016)	Polymorphism	Y
CEP290	NM_025114.3(CEP290):c.2512A>G (p.Lys838Glu)	VAR_031058	100593	Bardet-Biedl syndrome|Joubert syndrome|Leber congenital amaurosis|Meckel-Gruber syndrome|Renal dysplasia and retinal aplasia|not provided|not specified	Benign/Likely benign(Last reviewed: Jun 14, 2016)	Polymorphism	Y
CEP290	NM_025114.3(CEP290):c.829G>C (p.Glu277Gln)	VAR_064397	126269	Joubert syndrome|Meckel-Gruber syndrome|Nephronophthisis|not provided|not specified	Benign/Likely benign(Last reviewed: Jan 19, 2017)	Polymorphism	Y
CEP290	NM_025114.3(CEP290):c.3710G>A (p.Arg1237His)	VAR_031060	126257	Bardet-Biedl syndrome|Joubert syndrome|Joubert syndrome|Leber congenital amaurosis|Meckel-Gruber syndrome|Meckel-Gruber syndrome|Nephronophthisis|Renal dysplasia and retinal aplasia|not specified	Benign/Likely benign(Last reviewed: Nov 07, 2016)	Polymorphism	Y
CEP290	NM_025114.3(CEP290):c.2717T>G (p.Leu906Trp)	VAR_031059	126252	Bardet-Biedl syndrome|Joubert syndrome|Joubert syndrome|Leber congenital amaurosis|Meckel-Gruber syndrome|Meckel-Gruber syndrome|Nephronophthisis|Renal dysplasia and retinal aplasia|not specified	Benign/Likely benign(Last reviewed: Jun 18, 2016)	Polymorphism	Y
CEP290	NM_025114.3(CEP290):c.6401T>C (p.Ile2134Thr)	VAR_075696	166829	Joubert syndrome|Meckel-Gruber syndrome|Nephronophthisis|not provided|not specified	Benign/Likely benign(Last reviewed: Apr 28, 2017)	Unclassified	N
CEP290	NM_025114.3(CEP290):c.1991A>G (p.Asp664Gly)	VAR_064398	100592	Bardet-Biedl syndrome|Joubert syndrome|Joubert syndrome|Leber congenital amaurosis|Meckel-Gruber syndrome|Meckel-Gruber syndrome|Nephronophthisis|Renal dysplasia and retinal aplasia|not provided|not specified	Benign/Likely benign(Last reviewed: Jan 18, 2017)	Unclassified	N
CEP41	NM_018718.2(CEP41):c.718T>G (p.Cys240Gly)	VAR_067057	128705	not provided|not specified	Benign/Likely benign(Last reviewed: Mar 10, 2017)	Unclassified	N
CEP41	NM_018718.2(CEP41):c.616C>G (p.Pro206Ala)	VAR_067056	358942	Joubert syndrome|not specified	Uncertain significance(Last reviewed: Feb 20, 2017)	Unclassified	Y
CFH	NM_000186.3(CFH):c.3176T>C (p.Ile1059Thr)	VAR_025097	289336	Atypical hemolytic uremic syndrome|Basal laminar drusen|Macular degeneration|Mesangiocapillary glomerulonephritis, type II|not specified	Benign/Likely benign(Last reviewed: Aug 11, 2016)	Polymorphism	Y
CFTR	NM_000492.3(CFTR):c.902A>G (p.Tyr301Cys)	VAR_000142	198738	not specified	Uncertain significance(Last reviewed: Jan 24, 2017)	Disease	N
CFTR	NM_000492.3(CFTR):c.772A>G (p.Arg258Gly)	VAR_000139	54055	Cystic fibrosis|not specified	Uncertain significance(Last reviewed: Apr 22, 2017)	Disease	N
CFTR	NM_000492.3(CFTR):c.443T>C (p.Ile148Thr)	VAR_000128	38850	Cystic fibrosis|not specified	Benign/Likely benign(Last reviewed: Nov 21, 2016)	Disease	N
CFTR	NM_000492.3(CFTR):c.3208C>T (p.Arg1070Trp)	VAR_011564	53685	Congenital bilateral absence of the vas deferens|Cystic fibrosis|Cystic fibrosis|not provided	Pathogenic/Likely pathogenic(Last reviewed: Sep 29, 2016)	Disease	Y
CFTR	NM_000492.3(CFTR):c.3454G>C (p.Asp1152His)	VAR_000251	35867	Bronchiectasis with or without elevated sweat chloride 1|Congenital bilateral absence of the vas deferens|Cystic fibrosis|Hereditary pancreatitis|not provided|not specified	Pathogenic/Likely pathogenic(Last reviewed: Jul 05, 2017)	Disease	Y
CFTR	NM_000492.3(CFTR):c.3209G>A (p.Arg1070Gln)	VAR_000241	35866	Congenital bilateral absence of the vas deferens|Cystic fibrosis|Hereditary pancreatitis	Pathogenic/Likely pathogenic(Last reviewed: Jun 01, 2015)	Disease	Y
CFTR	NM_000492.3(CFTR):c.1865G>A (p.Gly622Asp)	VAR_000206	35833	Cystic fibrosis|Hereditary pancreatitis|not provided	Pathogenic(Last reviewed: Sep 01, 2016)	Polymorphism	N
CFTR	NM_000492.3(CFTR):c.1684G>A (p.Val562Ile)	VAR_000187	35830	Cystic fibrosis|not specified	Uncertain significance(Last reviewed: May 22, 2017)	Polymorphism	N
CFTR	NM_000492.3(CFTR):c.2735C>T (p.Ser912Leu)	VAR_000222	7205	Cystic fibrosis|Cystic fibrosis|not specified	Benign/Likely benign(Last reviewed: Feb 01, 2017)	Polymorphism	Y
CFTR	NM_000492.3(CFTR):c.3485G>T (p.Arg1162Leu)	VAR_000252	256253	Cystic fibrosis|not specified	Benign/Likely benign(Last reviewed: Nov 19, 2016)	Polymorphism	Y
CFTR	NM_000492.3(CFTR):c.1408G>A (p.Val470Met)	VAR_000164	7130	Cystic fibrosis|not specified	Benign/Likely benign(Last reviewed: Jun 14, 2016)	Polymorphism	Y
CHAT	NM_020549.4(CHAT):c.665G>C (p.Arg222Pro)	VAR_046684	421843	not specified	Uncertain significance(Last reviewed: Jun 22, 2017)	Polymorphism	N
CHAT	NM_020549.4(CHAT):c.141C>G (p.Asp47Glu)	VAR_046683	128718	not specified	Benign/Likely benign(Last reviewed: Dec 09, 2014)	Polymorphism	Y
CHAT	NM_020549.4(CHAT):c.358G>A (p.Ala120Thr)	VAR_011675	128724	not specified	Benign(Last reviewed: Aug 04, 2016)	Polymorphism	Y
CHAT	NM_020549.4(CHAT):c.727C>T (p.Leu243Phe)	VAR_046685	128726	not specified	Benign/Likely benign(Last reviewed: Mar 28, 2016)	Polymorphism	Y
CHAT	NM_020549.4(CHAT):c.1198G>A (p.Asp400Asn)	VAR_046687	128717	not specified	Benign/Likely benign(Last reviewed: Sep 20, 2016)	Polymorphism	Y
CHAT	NM_020549.4(CHAT):c.896C>T (p.Pro299Leu)	VAR_046686	261339	not provided|not specified	Likely benign(Last reviewed: Sep 18, 2017)	Polymorphism	Y
CHD2	NM_001271.3(CHD2):c.4721G>C (p.Gly1574Ala)	VAR_061099	257712	Epileptic encephalopathy, childhood-onset|not specified	Benign(Last reviewed: Jan 10, 2017)	Polymorphism	Y
CHD7	NM_017780.3(CHD7):c.2230G>A (p.Gly744Ser)	VAR_068116	158282	CHARGE association|not specified	Benign/Likely benign(Last reviewed: Jul 18, 2016)	Disease	N
CHD7	NM_017780.3(CHD7):c.7579A>C (p.Met2527Leu)	VAR_068152	158317	CHARGE association|Hypogonadism with anosmia|not specified	Benign/Likely benign(Last reviewed: Jun 14, 2016)	Disease	N
CHD7	NM_017780.3(CHD7):c.6478G>A (p.Ala2160Thr)	VAR_068146	158311	CHARGE association|not specified	Benign/Likely benign(Last reviewed: Jul 18, 2016)	Disease	N
CHD7	NM_017780.3(CHD7):c.3082A>G (p.Ile1028Val)	VAR_021059	2022	CHARGE association|not provided	Pathogenic(Last reviewed: Feb 27, 2016)	Disease	Y
CHD7	NM_017780.3(CHD7):c.6287A>G (p.His2096Arg)	VAR_033249	158309	CHARGE association	Likely pathogenic(Last reviewed: Sep 05, 2016)	Disease	Y
CHD7	NM_017780.3(CHD7):c.1565G>T (p.Gly522Val)	VAR_068111	241189	CHARGE association|Hypogonadism with anosmia|not specified	Benign/Likely benign(Last reviewed: Jan 17, 2017)	Polymorphism	Y
CHD7	NM_017780.3(CHD7):c.8950C>T (p.Leu2984Phe)	VAR_068160	95816	CHARGE association|Hypogonadism with anosmia|not provided|not specified	Benign/Likely benign(Last reviewed: Mar 31, 2017)	Polymorphism	Y
CHD7	NM_017780.3(CHD7):c.307T>A (p.Ser103Thr)	VAR_068106	95782	CHARGE association|Hypogonadism with anosmia|not specified	Benign/Likely benign(Last reviewed: Jan 06, 2017)	Polymorphism	Y
CHD7	NM_017780.3(CHD7):c.1018A>G (p.Met340Val)	VAR_048731	95773	CHARGE association|Hypogonadism with anosmia|not provided|not specified	Benign/Likely benign(Last reviewed: Dec 14, 2016)	Polymorphism	Y
CHD7	NM_017780.3(CHD7):c.8416C>G (p.Leu2806Val)	VAR_068157	95814	CHARGE association|Hypogonadism with anosmia|not specified	Benign/Likely benign(Last reviewed: Jan 06, 2017)	Polymorphism	Y
CHD7	NM_017780.3(CHD7):c.856A>G (p.Arg286Gly)	VAR_068381	158328	CHARGE association|not specified	Benign/Likely benign(Last reviewed: Sep 11, 2016)	Polymorphism	Y
CHEK2	NM_007194.3(CHEK2):c.953G>A (p.Arg318His)	VAR_019112	133890	Familial cancer of breast|Hereditary cancer-predisposing syndrome|not specified	Uncertain significance(Last reviewed: Dec 05, 2016)	Disease	N
CHEK2	NM_007194.3(CHEK2):c.751A>T (p.Ile251Phe)	VAR_019111	128086	Familial cancer of breast|Hereditary cancer-predisposing syndrome|not specified	Uncertain significance(Last reviewed: Jun 03, 2017)	Disease	N
CHEK2	NM_007194.3(CHEK2):c.980A>G (p.Tyr327Cys)	VAR_019114	128092	Familial cancer of breast|Familial cancer of breast|Hereditary cancer-predisposing syndrome|Li-Fraumeni syndrome 2|Malignant tumor of prostate|Osteosarcoma|not specified	Uncertain significance(Last reviewed: May 23, 2017)	Disease	N
CHEK2	NM_007194.3(CHEK2):c.433C>T (p.Arg145Trp)	VAR_008554	5592	CHEK2-Related Cancer Susceptibility|Familial cancer of breast|Hereditary cancer-predisposing syndrome|Li-Fraumeni syndrome 2|not provided|not specified	Pathogenic/Likely pathogenic(Last reviewed: Sep 11, 2017)	Disease	Y
CHEK2	NM_007194.3(CHEK2):c.1534C>G (p.Leu512Val)	VAR_021122	141856	Familial cancer of breast|Hereditary cancer-predisposing syndrome|not specified	Uncertain significance(Last reviewed: Apr 18, 2017)	Polymorphism	N
CHEK2	NM_007194.3(CHEK2):c.349A>G (p.Arg117Gly)	VAR_022461	128071	Familial cancer of breast|Hereditary cancer-predisposing syndrome|not provided	Pathogenic/Likely pathogenic(Last reviewed: May 22, 2017)	Polymorphism	N
CHEK2	NM_007194.3(CHEK2):c.1343T>G (p.Ile448Ser)	VAR_021120	133892	Familial cancer of breast|Hereditary cancer-predisposing syndrome|not specified	Benign/Likely benign(Last reviewed: Mar 22, 2017)	Polymorphism	Y
CHEK2	NM_007194.3(CHEK2):c.410G>A (p.Arg137Gln)	VAR_022462	128073	Familial cancer of breast|Hereditary cancer-predisposing syndrome|not specified	Likely benign(Last reviewed: Jun 08, 2017)	Polymorphism	Y
CHEK2	NM_007194.3(CHEK2):c.433C>T (p.Arg145Trp)	VAR_008554	5592	CHEK2-Related Cancer Susceptibility|Familial cancer of breast|Hereditary cancer-predisposing syndrome|Li-Fraumeni syndrome 2|not provided|not specified	Pathogenic/Likely pathogenic(Last reviewed: Sep 11, 2017)	Unclassified	N
CHEK2	NM_007194.3(CHEK2):c.176C>A (p.Thr59Lys)	VAR_026630	142041	Familial cancer of breast|Hereditary cancer-predisposing syndrome|not specified	Uncertain significance(Last reviewed: Oct 27, 2016)	Unclassified	Y
CHRNA2	NM_000742.3(CHRNA2):c.65C>T (p.Thr22Ile)	VAR_027639	128740	Epilepsy, nocturnal, frontal lobe type|not specified	Benign/Likely benign(Last reviewed: Jul 07, 2016)	Polymorphism	Y
CHRNA2	NM_000742.3(CHRNA2):c.373A>G (p.Thr125Ala)	VAR_027640	128739	Epilepsy, nocturnal, frontal lobe type|not specified	Benign/Likely benign(Last reviewed: Jun 14, 2016)	Polymorphism	Y
CHRNB1	NM_000747.2(CHRNB1):c.95A>G (p.Glu32Gly)	VAR_048169	128754	Congenital Myasthenic Syndrome, Dominant/Recessive|not specified	Benign(Last reviewed: Jun 14, 2016)	Polymorphism	Y
CHRND	NM_000751.2(CHRND):c.862C>G (p.Gln288Glu)	VAR_021212	198749	not provided|not specified	Benign/Likely benign(Last reviewed: Apr 17, 2015)	Disease	N
CHRND;CHRNG	NM_005199.4(CHRNG):c.445G>A (p.Ala149Thr)	VAR_030754	259667	Congenital Myasthenic Syndrome, Dominant/Recessive|Multiple pterygium syndrome Escobar type|not specified	Benign/Likely benign(Last reviewed: Jun 14, 2016)	Polymorphism	Y
CHRNE	NM_000080.3(CHRNE):c.53G>T (p.Gly18Val)	VAR_048170	128768	Congenital Myasthenic Syndrome, Dominant/Recessive|not specified	Benign/Likely benign(Last reviewed: Jul 08, 2016)	Polymorphism	Y
CHST3	NM_004273.4(CHST3):c.1070G>A (p.Arg357Gln)	VAR_021415	286657	Larsen syndrome|Skeletal dysplasia|Spondyloepiphyseal dysplasia|Spondyloepiphyseal dysplasia with congenital joint dislocations|not specified	Benign(Last reviewed: Jun 14, 2016)	Polymorphism	Y
CIITA	NM_000246.3(CIITA):c.2342C>T (p.Ser781Leu)	VAR_060104	317708	SCID due to absent class II HLA antigens|not specified	Benign/Likely benign(Last reviewed: Jun 14, 2016)	Polymorphism	Y
CIITA	NM_000246.3(CIITA):c.2345T>C (p.Val782Ala)	VAR_057711	317709	SCID due to absent class II HLA antigens|not specified	Benign/Likely benign(Last reviewed: Jun 14, 2016)	Polymorphism	Y
CIITA	NM_000246.3(CIITA):c.1499G>C (p.Gly500Ala)	VAR_005128	317694	SCID due to absent class II HLA antigens|not specified	Benign(Last reviewed: Jun 14, 2016)	Polymorphism	Y
CIITA	NM_000246.3(CIITA):c.2699A>G (p.Gln900Arg)	VAR_047908	317718	SCID due to absent class II HLA antigens|not specified	Benign(Last reviewed: Jun 14, 2016)	Polymorphism	Y
CLCN1	NM_000083.2(CLCN1):c.1238T>G (p.Phe413Cys)	VAR_001604	17531	Congenital myotonia, autosomal dominant form|Congenital myotonia, autosomal recessive form|not provided	Pathogenic(Last reviewed: Oct 13, 2016)	Disease	Y
CLCN1	NM_000083.2(CLCN1):c.461A>G (p.Gln154Arg)	VAR_075593	359101	Myotonia congenita|not specified	Benign/Likely benign(Last reviewed: Nov 10, 2016)	Polymorphism	Y
CLCN1	NM_000083.2(CLCN1):c.899G>A (p.Arg300Gln)	VAR_001597	252463	Myotonia congenita|not provided|not specified	Benign/Likely benign(Last reviewed: May 02, 2017)	Polymorphism	Y
CLCN1	NM_000083.2(CLCN1):c.2180C>T (p.Pro727Leu)	VAR_047779	359119	Myotonia congenita|not specified	Benign(Last reviewed: Jun 14, 2016)	Polymorphism	Y
CLCN1	NM_000083.2(CLCN1):c.1309G>A (p.Ala437Thr)	VAR_001606	359109	Myotonia congenita|not specified	Benign/Likely benign(Last reviewed: Jun 14, 2016)	Polymorphism	Y
CLCN2	NM_004366.5(CLCN2):c.704G>A (p.Arg235Gln)	VAR_057889	9038	Epilepsy with grand mal seizures on awakening|Epilepsy, juvenile myoclonic 8|Leukoencephalopathy with ataxia|not provided	Uncertain significance, risk factor(Last reviewed: Jul 26, 2017)	Disease	N
CLCN7	NM_001287.5(CLCN7):c.1252G>A (p.Val418Met)	VAR_021002	65634	Osteopetrosis|Osteopetrosis autosomal recessive 4|not specified	Benign/Likely benign(Last reviewed: Jun 22, 2016)	Polymorphism	Y
CLDN14	NM_001146077.1(CLDN14):c.11C>T (p.Thr4Met)	VAR_017227	44083	Nonsyndromic Hearing Loss, Recessive|not specified	Benign/Likely benign(Last reviewed: Jun 14, 2016)	Polymorphism	Y
CLN6	NM_017882.2(CLN6):c.34G>A (p.Ala12Thr)	VAR_066904	136802	Neuronal ceroid lipofuscinosis|not specified	Benign/Likely benign(Last reviewed: Feb 24, 2017)	Disease	N
CLN6	NM_017882.2(CLN6):c.214G>C (p.Glu72Gln)	VAR_021550	196481	Neuronal ceroid lipofuscinosis|not specified	Benign/Likely benign(Last reviewed: Jun 02, 2017)	Polymorphism	Y
CLN8	NM_018941.3(CLN8):c.374A>G (p.Asn125Ser)	VAR_066923	205207	not specified	Uncertain significance(Last reviewed: Mar 24, 2017)	Disease	N
CLN8	NM_018941.3(CLN8):c.709G>A (p.Gly237Arg)	VAR_058439	188917	Ceroid lipofuscinosis neuronal 8|not provided	Likely pathogenic(Last reviewed: Sep 16, 2016)	Disease	Y
CLN8	NM_018941.3(CLN8):c.685C>G (p.Pro229Ala)	VAR_066927	95924	Neuronal ceroid lipofuscinosis|not provided|not specified	Benign/Likely benign(Last reviewed: Jan 18, 2017)	Polymorphism	Y
CLN8	NM_018941.3(CLN8):c.274C>T (p.His92Tyr)	VAR_031704	128788	Neuronal ceroid lipofuscinosis|not provided|not specified	Benign/Likely benign(Last reviewed: Dec 05, 2016)	Polymorphism	Y
CLPB	NM_030813.5(CLPB):c.1222A>G (p.Arg408Gly)	VAR_073399	187785	3-methylglutaconic aciduria with cataracts, neurologic involvement, and neutropenia|not provided	Pathogenic/Likely pathogenic(Last reviewed: Mar 20, 2017)	Disease	Y
CNGA1	NM_000087.3(CNGA1):c.352G>A (p.Asp118Asn)	VAR_009296	166888	Retinitis Pigmentosa, Recessive|not specified	Benign/Likely benign(Last reviewed: Jun 14, 2016)	Polymorphism	Y
CNGB1	NM_001297.4(CNGB1):c.2233C>A (p.Leu745Ile)	VAR_059228	93698	Retinitis Pigmentosa, Recessive|not provided|not specified	Benign/Likely benign(Last reviewed: Jun 07, 2017)	Polymorphism	Y
CNGB1	NM_001297.4(CNGB1):c.299G>A (p.Arg100His)	VAR_058691	320110	Retinitis Pigmentosa, Recessive|not specified	Benign(Last reviewed: Jan 05, 2017)	Polymorphism	Y
CNGB1	NM_001297.4(CNGB1):c.2732A>G (p.Lys911Arg)	VAR_059229	166892	Retinitis Pigmentosa, Recessive|not specified	Benign/Likely benign(Last reviewed: Jun 14, 2016)	Polymorphism	Y
CNGB3	NM_019098.4(CNGB3):c.919A>G (p.Ile307Val)	VAR_024418	261092	Achromatopsia|Stargardt Disease, Recessive|not specified	Benign/Likely benign(Last reviewed: Jul 19, 2016)	Polymorphism	Y
CNGB3	NM_019098.4(CNGB3):c.2264A>G (p.Glu755Gly)	VAR_018112	166899	Achromatopsia|Stargardt Disease, Recessive|not specified	Benign/Likely benign(Last reviewed: Jul 19, 2016)	Polymorphism	Y
CNGB3	NM_019098.4(CNGB3):c.892A>C (p.Thr298Pro)	VAR_018110	95929	Achromatopsia|Stargardt Disease, Recessive|not specified	Benign(Last reviewed: Jun 14, 2016)	Polymorphism	Y
CNGB3	NM_019098.4(CNGB3):c.702T>G (p.Cys234Trp)	VAR_018109	261090	Achromatopsia|Stargardt Disease, Recessive|not specified	Benign(Last reviewed: Jun 14, 2016)	Polymorphism	Y
CNGB3	NM_019098.4(CNGB3):c.608G>A (p.Arg203Gln)	VAR_025524	261089	Achromatopsia|Stargardt Disease, Recessive|not specified	Benign/Likely benign(Last reviewed: Jun 14, 2016)	Unclassified	N
CNTNAP2	NM_014141.5(CNTNAP2):c.2606T>C (p.Ile869Thr)	VAR_046239	5493	Autism 15|Cortical dysplasia-focal epilepsy syndrome|not specified	Uncertain significance, risk factor(Last reviewed: Feb 17, 2017)	Polymorphism	N
CNTNAP2	NM_014141.5(CNTNAP2):c.341G>A (p.Arg114Gln)	VAR_046227	196459	Autism 15|Cortical dysplasia-focal epilepsy syndrome|not specified	Uncertain significance(Last reviewed: May 23, 2017)	Polymorphism	N
CNTNAP2	NM_014141.5(CNTNAP2):c.2147A>G (p.Tyr716Cys)	VAR_046236	205258	not specified	Uncertain significance(Last reviewed: Aug 12, 2015)	Polymorphism	N
CNTNAP2	NM_014141.5(CNTNAP2):c.3758T>C (p.Ile1253Thr)	VAR_046247	205319	Autism 15|Cortical dysplasia-focal epilepsy syndrome|not specified	Uncertain significance(Last reviewed: May 23, 2017)	Polymorphism	N
CNTNAP2	NM_014141.5(CNTNAP2):c.653C>T (p.Thr218Met)	VAR_046228	205310	not specified	Uncertain significance(Last reviewed: Mar 16, 2015)	Polymorphism	N
CNTNAP2	NM_014141.5(CNTNAP2):c.3305T>C (p.Val1102Ala)	VAR_046242	205221	Cortical dysplasia-focal epilepsy syndrome|not specified	Likely benign(Last reviewed: Mar 23, 2017)	Polymorphism	Y
CNTNAP2	NM_014141.5(CNTNAP2):c.1220A>G (p.Asn407Ser)	VAR_046232	95555	not specified	Benign/Likely benign(Last reviewed: Dec 13, 2016)	Polymorphism	Y
COCH	NM_001135058.1(COCH):c.1055C>G (p.Thr352Ser)	VAR_011925	226525	Nonsyndromic Hearing Loss, Dominant|not specified	Benign(Last reviewed: Jun 14, 2016)	Polymorphism	Y
COCH	NM_004086.2(COCH):c.1553A>G (p.Glu518Gly)	VAR_050896	162972	Nonsyndromic Hearing Loss, Dominant|not specified	Benign/Likely benign(Last reviewed: Jun 14, 2016)	Polymorphism	Y
COCH	NM_004086.2(COCH):c.1204A>G (p.Ile402Val)	VAR_022261	313004	Nonsyndromic Hearing Loss, Dominant|not specified	Likely benign(Last reviewed: May 26, 2017)	Polymorphism	Y
COG1	NM_018714.2(COG1):c.1175A>G (p.Asn392Ser)	VAR_020415	95911	Congenital disorder of glycosylation|not specified	Benign(Last reviewed: Jun 14, 2016)	Polymorphism	Y
COG5	NM_006348.3(COG5):c.988T>C (p.Phe330Leu)	VAR_039142	95374	Congenital disorder of glycosylation|not specified	Benign(Last reviewed: Jun 14, 2016)	Polymorphism	Y
COG5	NM_006348.3(COG5):c.1093A>G (p.Ile365Val)	VAR_039182	358464	Congenital disorder of glycosylation|not specified	Benign/Likely benign(Last reviewed: Jun 14, 2016)	Polymorphism	Y
COG6	NM_020751.2(COG6):c.898C>T (p.His300Tyr)	VAR_048761	166919	Congenital disorder of glycosylation|not provided|not specified	Benign/Likely benign(Last reviewed: May 30, 2017)	Polymorphism	Y
COG6	NM_020751.2(COG6):c.28G>A (p.Ala10Thr)	VAR_048759	193436	Congenital disorder of glycosylation|not specified	Benign(Last reviewed: Jun 14, 2016)	Polymorphism	Y
COG6	NM_020751.2(COG6):c.94T>A (p.Cys32Ser)	VAR_048760	193437	Congenital disorder of glycosylation|not specified	Benign(Last reviewed: Jun 14, 2016)	Polymorphism	Y
COG6	NM_020751.2(COG6):c.1340T>C (p.Met447Thr)	VAR_061110	312143	Congenital disorder of glycosylation|not specified	Benign/Likely benign(Last reviewed: Jun 14, 2016)	Polymorphism	Y
COG7	NM_153603.3(COG7):c.1814C>T (p.Thr605Met)	VAR_048762	96522	Congenital disorder of glycosylation|not specified	Benign/Likely benign(Last reviewed: Jun 14, 2016)	Polymorphism	Y
COL10A1	NM_000493.3(COL10A1):c.80T>C (p.Met27Thr)	VAR_023186	256262	Metaphyseal chondrodysplasia|not specified	Benign(Last reviewed: Jun 14, 2016)	Polymorphism	Y
COL10A1	NM_000493.3(COL10A1):c.593G>A (p.Arg198His)	VAR_023187	355103	Metaphyseal chondrodysplasia|not provided	Likely benign(Last reviewed: Jan 27, 2017)	Polymorphism	Y
COL10A1	NM_000493.3(COL10A1):c.1633G>C (p.Gly545Arg)	VAR_001840	256260	Metaphyseal chondrodysplasia|not specified	Benign(Last reviewed: Jun 14, 2016)	Polymorphism	Y
COL11A1	NM_001854.3(COL11A1):c.138T>G (p.Asp46Glu)	VAR_047724	258438	Fibrochondrogenesis|Marshall syndrome|Stickler Syndrome, Dominant|not specified	Benign(Last reviewed: Oct 06, 2016)	Polymorphism	Y
COL11A1	NM_001854.3(COL11A1):c.4603T>C (p.Ser1535Pro)	VAR_047727	17137	Fibrochondrogenesis|Lumbar disc herniation, susceptibility to|Marshall syndrome|Stickler Syndrome, Dominant|not specified	Benign, risk factor(Last reviewed: Sep 29, 2016)	Polymorphism	Y
COL11A1	NM_001854.3(COL11A1):c.3968C>T (p.Pro1323Leu)	VAR_047726	258461	Fibrochondrogenesis|Marshall syndrome|Stickler Syndrome, Dominant|not specified	Benign(Last reviewed: Sep 29, 2016)	Polymorphism	Y
COL11A2	NM_080680.2(COL11A2):c.4799G>A (p.Arg1600Gln)	VAR_013597	178604	Fibrochondrogenesis|Nonsyndromic Hearing Loss, Dominant|Otospondylomegaepiphyseal dysplasia|Stickler Syndrome, Dominant|Weissenbacher-Zweymuller syndrome|not specified	Benign/Likely benign(Last reviewed: Jun 14, 2016)	Polymorphism	Y
COL11A2	NM_080680.2(COL11A2):c.3946C>A (p.Pro1316Thr)	VAR_013596	46567	Fibrochondrogenesis|Nonsyndromic Hearing Loss, Dominant|Otospondylomegaepiphyseal dysplasia|Stickler Syndrome, Dominant|Weissenbacher-Zweymuller syndrome|not specified	Benign(Last reviewed: Oct 06, 2016)	Polymorphism	Y
COL11A2	NM_080680.2(COL11A2):c.4884G>C (p.Glu1628Asp)	VAR_033797	178663	Fibrochondrogenesis|Nonsyndromic Hearing Loss, Dominant|Otospondylomegaepiphyseal dysplasia|Stickler Syndrome, Dominant|Weissenbacher-Zweymuller syndrome|not specified	Benign/Likely benign(Last reviewed: Oct 10, 2016)	Polymorphism	Y
COL11A2	NM_080680.2(COL11A2):c.5165C>T (p.Pro1722Leu)	VAR_048807	46568	Fibrochondrogenesis|Nonsyndromic Hearing Loss, Dominant|Otospondylomegaepiphyseal dysplasia|Stickler Syndrome, Dominant|Weissenbacher-Zweymuller syndrome|not specified	Benign/Likely benign(Last reviewed: Oct 05, 2016)	Polymorphism	Y
COL11A2	NM_080680.2(COL11A2):c.826G>A (p.Glu276Lys)	VAR_048805	46569	Fibrochondrogenesis|Nonsyndromic Hearing Loss, Dominant|Otospondylomegaepiphyseal dysplasia|Stickler Syndrome, Dominant|Weissenbacher-Zweymuller syndrome|not specified	Benign(Last reviewed: Sep 29, 2016)	Polymorphism	Y
COL17A1	NM_000494.3(COL17A1):c.4109A>G (p.Asp1370Gly)	VAR_017602	256275	Epidermolysis bullosa, junctional|not specified	Benign(Last reviewed: Jun 14, 2016)	Polymorphism	Y
COL17A1	NM_000494.3(COL17A1):c.10A>G (p.Thr4Ala)	VAR_048781	256264	Epidermolysis bullosa, junctional|not specified	Benign(Last reviewed: Jun 14, 2016)	Polymorphism	Y
COL17A1	NM_000494.3(COL17A1):c.1282G>A (p.Gly428Ser)	VAR_017597	256266	Epidermolysis bullosa, junctional|not specified	Benign(Last reviewed: Jun 14, 2016)	Polymorphism	Y
COL17A1	NM_000494.3(COL17A1):c.629C>T (p.Thr210Met)	VAR_017593	256276	Epidermolysis bullosa, junctional|not specified	Benign(Last reviewed: Jun 14, 2016)	Polymorphism	Y
COL17A1	NM_000494.3(COL17A1):c.2107A>G (p.Met703Val)	VAR_017600	256267	Epidermolysis bullosa, junctional|not specified	Benign(Last reviewed: Jun 14, 2016)	Polymorphism	Y
COL1A2	NM_000089.3(COL1A2):c.2123G>A (p.Arg708Gln)	VAR_001876	17250	Marfan syndrome, atypical|not specified	Uncertain significance(Last reviewed: Oct 04, 2016)	Polymorphism	N
COL1A2	NM_000089.3(COL1A2):c.808G>A (p.Val270Ile)	VAR_030118	284986	not specified	Likely benign(Last reviewed: Jun 09, 2017)	Polymorphism	Y
COL1A2	NM_000089.3(COL1A2):c.1645C>G (p.Pro549Ala)	VAR_001867	254953	Ehlers-Danlos syndrome, procollagen proteinase deficient|Osteogenesis Imperfecta, Dominant|not specified	Benign(Last reviewed: Jun 14, 2016)	Polymorphism	Y
COL27A1	NM_032888.3(COL27A1):c.2089G>C (p.Gly697Arg)	VAR_072564	143245	Steel syndrome|not provided	Pathogenic(Last reviewed: Jun 07, 2016)	Disease	Y
COL2A1	NM_001844.4(COL2A1):c.3589G>A (p.Gly1197Ser)	VAR_001765	17361	Spondyloepiphyseal dysplasia congenita|not provided	Pathogenic/Likely pathogenic(Last reviewed: Feb 16, 2017)	Disease	Y
COL2A1	NM_001844.4(COL2A1):c.3991G>A (p.Val1331Ile)	VAR_017652	258234	Stickler Syndrome, Dominant|Type II Collagenopathies|not specified	Benign/Likely benign(Last reviewed: Jun 14, 2016)	Polymorphism	Y
COL2A1	NM_001844.4(COL2A1):c.4213G>A (p.Gly1405Ser)	VAR_033785	258238	Stickler Syndrome, Dominant|Type II Collagenopathies|not specified	Benign/Likely benign(Last reviewed: Jun 14, 2016)	Polymorphism	Y
COL2A1	NM_001844.4(COL2A1):c.426A>T (p.Glu142Asp)	VAR_033782	258239	Stickler Syndrome, Dominant|Type II Collagenopathies|not specified	Benign/Likely benign(Last reviewed: Aug 26, 2016)	Polymorphism	Y
COL2A1	NM_001844.4(COL2A1):c.25A>T (p.Thr9Ser)	VAR_017638	93788	Stickler Syndrome, Dominant|Type II Collagenopathies|not specified	Benign/Likely benign(Last reviewed: Jun 27, 2017)	Polymorphism	Y
COL2A1	NM_001844.4(COL2A1):c.1913C>T (p.Thr638Ile)	VAR_033783	258220	Stickler Syndrome, Dominant|Type II Collagenopathies|not specified	Benign/Likely benign(Last reviewed: Feb 28, 2017)	Polymorphism	Y
COL3A1	NM_000090.3(COL3A1):c.2092G>A (p.Ala698Thr)	VAR_001778	17205	COLLAGEN TYPE III POLYMORPHISM|Ehlers-Danlos syndrome, type 4|Thoracic aortic aneurysm and aortic dissection|not specified	Benign(Last reviewed: Jun 07, 2017)	Polymorphism	Y
COL3A1	NM_000090.3(COL3A1):c.2002C>A (p.Pro668Thr)	VAR_011127	199726	Ehlers-Danlos syndrome, type 4|Thoracic aortic aneurysm and aortic dissection|not provided|not specified	Benign/Likely benign(Last reviewed: Aug 29, 2017)	Polymorphism	Y
COL3A1	NM_000090.3(COL3A1):c.3613A>G (p.Ile1205Val)	VAR_020012	136856	Ehlers-Danlos syndrome, type 4|not specified	Benign(Last reviewed: Jan 15, 2017)	Polymorphism	Y
COL3A1	NM_000090.3(COL3A1):c.1804C>A (p.Pro602Thr)	VAR_001775	136845	Ehlers-Danlos syndrome, type 4|Thoracic aortic aneurysm and aortic dissection|not specified	Benign/Likely benign(Last reviewed: Jan 21, 2017)	Polymorphism	Y
COL3A1	NM_000090.3(COL3A1):c.2035G>A (p.Ala679Thr)	VAR_055666	35964	Ehlers-Danlos syndrome, type 4|Familial aortopathy|Thoracic aortic aneurysm and aortic dissection|not specified	Benign/Likely benign(Last reviewed: Jan 26, 2017)	Polymorphism	Y
COL4A1	NM_001845.5(COL4A1):c.4002A>C (p.Gln1334His)	VAR_020013	197520	Angiopathy, hereditary, with nephropathy, aneurysms, and muscle cramps|Brain small vessel disease with hemorrhage|Porencephaly|not specified	Benign(Last reviewed: Jun 14, 2016)	Polymorphism	Y
COL4A1;COL4A2	NM_001845.5(COL4A1):c.19G>C (p.Val7Leu)	VAR_030027	193216	Angiopathy, hereditary, with nephropathy, aneurysms, and muscle cramps|Brain small vessel disease with hemorrhage|Porencephaly|not specified	Benign(Last reviewed: Jun 14, 2016)	Polymorphism	Y
COL4A2	NM_001846.3(COL4A2):c.3368A>G (p.Glu1123Gly)	VAR_067554	29629	Hemorrhage, intracerebral, susceptibility to|Porencephaly|not provided	Benign/Likely benign, risk factor(Last reviewed: Jan 09, 2017)	Polymorphism	Y
COL4A2	NM_001846.3(COL4A2):c.2102A>G (p.Lys701Arg)	VAR_067552	235684	Porencephaly|not provided	Benign(Last reviewed: Jun 14, 2016)	Polymorphism	Y
COL4A3	NM_000091.4(COL4A3):c.1918G>A (p.Gly640Arg)	VAR_011210	371669	Alport syndrome, autosomal recessive|not provided	Likely pathogenic(Last reviewed: Nov 10, 2016)	Disease	Y
COL4A3	NM_000091.4(COL4A3):c.4981C>T (p.Arg1661Cys)	VAR_011219	287915	Alport syndrome, autosomal recessive	Likely pathogenic(Last reviewed: Jul 11, 2016)	Disease	Y
COL4A3	NM_000091.4(COL4A3):c.422T>C (p.Leu141Pro)	VAR_030944	254996	Alport syndrome|not specified	Benign(Last reviewed: Jun 14, 2016)	Polymorphism	Y
COL4A3	NM_000091.4(COL4A3):c.1352A>G (p.His451Arg)	VAR_011208	254979	Alport syndrome|not specified	Benign/Likely benign(Last reviewed: Jun 14, 2016)	Polymorphism	Y
COL4A3	NM_000091.4(COL4A3):c.127G>C (p.Gly43Arg)	VAR_011202	254978	Alport syndrome|not specified	Benign(Last reviewed: Jun 14, 2016)	Polymorphism	Y
COL4A3	NM_000091.4(COL4A3):c.1721C>T (p.Pro574Leu)	VAR_011209	254985	Alport syndrome|not specified	Benign(Last reviewed: Jun 14, 2016)	Polymorphism	Y
COL4A3	NM_000091.4(COL4A3):c.1223G>A (p.Arg408His)	VAR_011207	254977	Alport syndrome|not specified	Benign/Likely benign(Last reviewed: Jun 14, 2016)	Polymorphism	Y
COL4A3	NM_000091.4(COL4A3):c.976G>T (p.Asp326Tyr)	VAR_011205	255010	Alport syndrome|not specified	Benign/Likely benign(Last reviewed: Jun 14, 2016)	Polymorphism	Y
COL4A3	NM_000091.4(COL4A3):c.3807C>A (p.Asp1269Glu)	VAR_011214	254995	Alport syndrome|not specified	Benign/Likely benign(Last reviewed: Jun 14, 2016)	Polymorphism	Y
COL4A3	NM_000091.4(COL4A3):c.485A>G (p.Glu162Gly)	VAR_011203	255001	Alport syndrome|not specified	Benign(Last reviewed: Jun 14, 2016)	Polymorphism	Y
COL4A4	NM_000092.4(COL4A4):c.17T>C (p.Ile6Thr)	VAR_031622	255016	Alport syndrome|not specified	Benign(Last reviewed: Jun 14, 2016)	Polymorphism	Y
COL4A4	NM_000092.4(COL4A4):c.1634G>C (p.Gly545Ala)	VAR_008149	255015	Alport syndrome|not specified	Benign/Likely benign(Last reviewed: Jun 14, 2016)	Polymorphism	Y
COL4A4	NM_000092.4(COL4A4):c.3011C>T (p.Pro1004Leu)	VAR_008152	255028	Alport syndrome|not specified	Benign(Last reviewed: Jun 14, 2016)	Polymorphism	Y
COL4A4	NM_000092.4(COL4A4):c.1444C>T (p.Pro482Ser)	VAR_022069	255014	Alport syndrome|not specified	Benign(Last reviewed: Jun 14, 2016)	Polymorphism	Y
COL4A4	NM_000092.4(COL4A4):c.2008G>A (p.Val670Ile)	VAR_055681	255018	Alport syndrome|not specified	Benign/Likely benign(Last reviewed: Jun 14, 2016)	Polymorphism	Y
COL4A4	NM_000092.4(COL4A4):c.1781A>G (p.Glu594Gly)	VAR_055680	218426	Alport syndrome|not specified	Benign/Likely benign(Last reviewed: Jun 14, 2016)	Polymorphism	Y
COL4A4	NM_000092.4(COL4A4):c.2276C>T (p.Pro759Leu)	VAR_055682	255019	Alport syndrome|not specified	Benign/Likely benign(Last reviewed: Jun 14, 2016)	Polymorphism	Y
COL4A4	NM_000092.4(COL4A4):c.4207T>C (p.Ser1403Pro)	VAR_031628	255038	Alport syndrome|not specified	Benign(Last reviewed: Jun 14, 2016)	Polymorphism	Y
COL4A5	NM_000495.4(COL4A5):c.1871G>A (p.Gly624Asp)	VAR_011245	24455	Alport syndrome, X-linked recessive|Glomerulopathy|Hypertension|Mild proteinuria|not provided	Pathogenic(Last reviewed: May 11, 2017)	Disease	Y
COL4A5	NM_000495.4(COL4A5):c.1289C>A (p.Ala430Asp)	VAR_001933	256277	not provided|not specified	Benign/Likely benign(Last reviewed: Jun 07, 2016)	Polymorphism	Y
COL4A5	NM_000495.4(COL4A5):c.1331T>G (p.Ile444Ser)	VAR_001934	24398	Alport syndrome, X-linked recessive|not specified	Benign(Last reviewed: Apr 07, 2016)	Polymorphism	Y
COL5A1	NM_000093.4(COL5A1):c.574G>A (p.Asp192Asn)	VAR_057905	136920	Ehlers-Danlos syndrome, classic type|Ehlers-Danlos syndrome, type 7A|not specified	Benign/Likely benign(Last reviewed: Jan 20, 2017)	Polymorphism	Y
COL5A1	NM_000093.4(COL5A1):c.2852A>G (p.Asn951Ser)	VAR_057908	136875	Ehlers-Danlos syndrome, classic type|Ehlers-Danlos syndrome, type 7A|not specified	Benign/Likely benign(Last reviewed: Jan 30, 2017)	Polymorphism	Y
COL5A1	NM_000093.4(COL5A1):c.2588A>T (p.Glu863Val)	VAR_075702	213044	Thoracic aortic aneurysm and aortic dissection|not specified	Uncertain significance(Last reviewed: Mar 21, 2017)	Unclassified	Y
COL5A1	NM_000093.4(COL5A1):c.3418G>A (p.Val1140Met)	VAR_075703	213048	Thoracic aortic aneurysm and aortic dissection|not specified	Uncertain significance(Last reviewed: Mar 21, 2017)	Unclassified	Y
COL5A2	NM_000393.4(COL5A2):c.2498C>T (p.Pro833Leu)	VAR_057911	136944	Ehlers-Danlos syndrome, classic type|Ehlers-Danlos syndrome, type 7A|not specified	Benign/Likely benign(Last reviewed: Jan 30, 2017)	Polymorphism	Y
COL5A2	NM_000393.4(COL5A2):c.4295A>T (p.Asp1432Val)	VAR_057913	213128	Ehlers-Danlos syndrome, classic type|not specified	Likely benign(Last reviewed: Apr 20, 2017)	Polymorphism	Y
COL5A2	NM_000393.4(COL5A2):c.1378C>T (p.Pro460Ser)	VAR_048799	136939	Ehlers-Danlos syndrome, classic type|Ehlers-Danlos syndrome, type 7A|not specified	Benign/Likely benign(Last reviewed: Jun 05, 2017)	Polymorphism	Y
COL5A2	NM_000393.4(COL5A2):c.1535T>C (p.Val512Ala)	VAR_057910	136941	Ehlers-Danlos syndrome, classic type|Ehlers-Danlos syndrome, type 7A|not specified	Benign/Likely benign(Last reviewed: Jan 30, 2017)	Polymorphism	Y
COL5A2	NM_000393.4(COL5A2):c.2867G>C (p.Arg956Pro)	VAR_048800	136948	not specified	Benign(Last reviewed: Jun 28, 2013)	Polymorphism	Y
COL6A1	NM_001848.2(COL6A1):c.347G>A (p.Ser116Asn)	VAR_058213	93872	Collagen VI-related myopathy|not specified	Benign/Likely benign(Last reviewed: Jun 14, 2016)	Disease	N
COL6A1	NM_001848.2(COL6A1):c.850G>A (p.Gly284Arg)	VAR_058218	17180	Bethlem myopathy 1|Ullrich congenital muscular dystrophy 1|Ullrich congenital muscular dystrophy 1, autosomal dominant|not provided	Pathogenic(Last reviewed: Sep 13, 2017)	Disease	Y
COL6A1	NM_001848.2(COL6A1):c.868G>A (p.Gly290Arg)	VAR_058219	17181	Bethlem myopathy 1|Ullrich congenital muscular dystrophy 1|not provided	Pathogenic(Last reviewed: Jun 16, 2017)	Disease	Y
COL6A1	NM_001848.2(COL6A1):c.868G>A (p.Gly290Arg)	VAR_058219	17181	Bethlem myopathy 1|Ullrich congenital muscular dystrophy 1|not provided	Pathogenic(Last reviewed: Jun 16, 2017)	Disease	Y
COL6A1	NM_001848.2(COL6A1):c.2549G>A (p.Arg850His)	VAR_048764	93861	Collagen VI-related myopathy|not specified	Benign(Last reviewed: Jun 14, 2016)	Polymorphism	Y
COL6A1	NM_001848.2(COL6A1):c.2669C>T (p.Ser890Leu)	VAR_058224	93865	Collagen VI-related myopathy|not specified	Benign(Last reviewed: Jun 14, 2016)	Polymorphism	Y
COL6A1	NM_001848.2(COL6A1):c.1316G>A (p.Arg439Gln)	VAR_048763	93810	Collagen VI-related myopathy|not specified	Benign/Likely benign(Last reviewed: Jun 14, 2016)	Polymorphism	Y
COL6A2	NM_001849.3(COL6A2):c.2351G>A (p.Arg784His)	VAR_058234	93938	Collagen VI-related myopathy|not provided|not specified	Benign/Likely benign(Last reviewed: Jan 26, 2017)	Disease	N
COL6A2	NM_001849.3(COL6A2):c.2039G>A (p.Arg680His)	VAR_030316	93929	Collagen VI-related myopathy|Myosclerosis|not specified	Benign(Last reviewed: Jun 14, 2016)	Polymorphism	Y
COL6A2	NM_001849.3(COL6A2):c.1552C>T (p.Pro518Ser)	VAR_058229	93911	Collagen VI-related myopathy|Myosclerosis|not specified	Benign/Likely benign(Last reviewed: Jun 14, 2016)	Polymorphism	Y
COL6A2	NM_001849.3(COL6A2):c.316G>A (p.Glu106Lys)	VAR_058225	93953	Collagen VI-related myopathy|not provided|not specified	Benign/Likely benign(Last reviewed: Jun 14, 2016)	Polymorphism	Y
COL6A2	NM_001849.3(COL6A2):c.2558G>A (p.Arg853Gln)	VAR_058237	162538	Collagen VI-related myopathy|Myosclerosis|not specified	Benign/Likely benign(Last reviewed: Jun 14, 2016)	Polymorphism	Y
COL6A2	NM_001849.3(COL6A2):c.1196G>A (p.Ser399Asn)	VAR_030315	93903	Collagen VI-related myopathy|Myosclerosis|not specified	Benign(Last reviewed: Jun 14, 2016)	Polymorphism	Y
COL6A2	NM_001849.3(COL6A2):c.679G>A (p.Asp227Asn)	VAR_048801	93956	Collagen VI-related myopathy|Myosclerosis|not specified	Benign/Likely benign(Last reviewed: Jun 14, 2016)	Polymorphism	Y
COL6A2	NM_001849.3(COL6A2):c.1466G>A (p.Arg489Gln)	VAR_058227	258316	Collagen VI-related myopathy|Myosclerosis|not specified	Benign/Likely benign(Last reviewed: Jun 14, 2016)	Polymorphism	Y
COL6A2;FTCD	NM_001849.3(COL6A2):c.3043A>C (p.Ile1015Leu)	VAR_048803	93952	Collagen VI-related myopathy|GLUTAMATE FORMIMINOTRANSFERASE DEFICIENCY|Myosclerosis|not provided|not specified	Benign/Likely benign(Last reviewed: Oct 14, 2016)	Polymorphism	Y
COL6A2;FTCD	NM_001849.3(COL6A2):c.2803G>A (p.Gly935Arg)	VAR_048802	93948	Collagen VI-related myopathy|GLUTAMATE FORMIMINOTRANSFERASE DEFICIENCY|Myosclerosis|not specified	Benign/Likely benign(Last reviewed: Jul 06, 2016)	Polymorphism	Y
COL6A3	NM_004369.3(COL6A3):c.8822C>T (p.Ala2941Val)	VAR_058264	95010	Collagen VI-related myopathy|not specified	Benign/Likely benign(Last reviewed: Aug 16, 2016)	Disease	N
COL6A3	NM_004369.3(COL6A3):c.4184G>A (p.Arg1395Gln)	VAR_058251	94929	Collagen VI-related myopathy|not provided|not specified	Benign/Likely benign(Last reviewed: Nov 03, 2016)	Disease	N
COL6A3	NM_004369.3(COL6A3):c.4895G>A (p.Arg1632Gln)	VAR_058254	94941	Collagen VI-related myopathy|not specified	Benign/Likely benign(Last reviewed: Aug 08, 2016)	Polymorphism	Y
COL6A3	NM_004369.3(COL6A3):c.1471G>C (p.Asp491His)	VAR_058243	94907	Collagen VI-related myopathy|not specified	Benign/Likely benign(Last reviewed: Jun 14, 2016)	Polymorphism	Y
COL6A3	NM_004369.3(COL6A3):c.9206C>T (p.Thr3069Ile)	VAR_047288	95018	Collagen VI-related myopathy|not specified	Benign(Last reviewed: Jun 14, 2016)	Polymorphism	Y
COL6A3	NM_004369.3(COL6A3):c.2419G>A (p.Ala807Thr)	VAR_058246	94915	Collagen VI-related myopathy|not specified	Benign/Likely benign(Last reviewed: Jun 14, 2016)	Polymorphism	Y
COL6A3	NM_004369.3(COL6A3):c.1231C>G (p.Leu411Val)	VAR_058242	94903	Collagen VI-related myopathy|not specified	Benign/Likely benign(Last reviewed: Jan 15, 2017)	Polymorphism	Y
COL6A3	NM_004369.3(COL6A3):c.1475C>G (p.Thr492Ser)	VAR_058244	94908	Collagen VI-related myopathy|not specified	Benign/Likely benign(Last reviewed: Jun 14, 2016)	Polymorphism	Y
COL6A3	NM_004369.3(COL6A3):c.8962A>G (p.Met2988Val)	VAR_047286	95013	Collagen VI-related myopathy|not specified	Benign/Likely benign(Last reviewed: Jun 14, 2016)	Polymorphism	Y
COL6A3	NM_004369.3(COL6A3):c.3262A>C (p.Lys1088Gln)	VAR_047282	94924	Collagen VI-related myopathy|not specified	Benign(Last reviewed: Jun 14, 2016)	Polymorphism	Y
COL6A3	NM_004369.3(COL6A3):c.9034G>C (p.Ala3012Pro)	VAR_047287	95014	Collagen VI-related myopathy|not specified	Benign(Last reviewed: Jun 14, 2016)	Polymorphism	Y
COL6A3	NM_004369.3(COL6A3):c.5059C>T (p.Pro1687Ser)	VAR_058256	94942	Collagen VI-related myopathy|not specified	Benign/Likely benign(Last reviewed: Jun 28, 2017)	Polymorphism	Y
COL6A3	NM_004369.3(COL6A3):c.1976G>A (p.Arg659His)	VAR_047280	94914	Collagen VI-related myopathy|not specified	Benign/Likely benign(Last reviewed: Jun 14, 2016)	Polymorphism	Y
COL6A3	NM_004369.3(COL6A3):c.8491G>C (p.Asp2831His)	VAR_001911	95006	Collagen VI-related myopathy|not specified	Benign(Last reviewed: Jun 14, 2016)	Polymorphism	Y
COL6A3	NM_004369.3(COL6A3):c.6653C>T (p.Pro2218Leu)	VAR_047283	94967	Collagen VI-related myopathy|not specified	Benign(Last reviewed: Jun 14, 2016)	Polymorphism	Y
COL6A3	NM_004369.3(COL6A3):c.4727G>A (p.Arg1576Gln)	VAR_058253	94938	Collagen VI-related myopathy|not specified	Benign/Likely benign(Last reviewed: Jun 14, 2016)	Polymorphism	Y
COL6A3	NM_004369.3(COL6A3):c.8780T>C (p.Met2927Thr)	VAR_047285	95008	Collagen VI-related myopathy|not specified	Benign(Last reviewed: Jun 14, 2016)	Polymorphism	Y
COL6A3	NM_004369.3(COL6A3):c.2488G>T (p.Ala830Ser)	VAR_058247	94916	Collagen VI-related myopathy|not specified	Benign/Likely benign(Last reviewed: Jun 14, 2016)	Polymorphism	Y
COL6A3	NM_004369.3(COL6A3):c.3191G>A (p.Arg1064Gln)	VAR_058249	94922	Collagen VI-related myopathy|not specified	Benign/Likely benign(Last reviewed: Dec 13, 2016)	Unclassified	N
COL6A3	NM_004369.3(COL6A3):c.2030G>A (p.Arg677His)	VAR_058245	198167	Collagen VI-related myopathy|not specified	Benign/Likely benign(Last reviewed: May 11, 2017)	Unclassified	N
COL7A1	NM_000094.3(COL7A1):c.1784C>T (p.Pro595Leu)	VAR_001810	255103	Dystrophic epidermolysis bullosa|not specified	Benign(Last reviewed: Jun 14, 2016)	Disease	N
COL7A1	NM_000094.3(COL7A1):c.3830C>T (p.Pro1277Leu)	VAR_001811	255109	Dystrophic epidermolysis bullosa|not specified	Benign/Likely benign(Last reviewed: Jun 14, 2016)	Disease	N
COL7A1	NM_000094.3(COL7A1):c.6205C>T (p.Arg2069Cys)	VAR_064996	17463	Abnormal blistering of the skin|Abnormality of dental enamel|Abnormality of the teeth|Alopecia of scalp|Decreased body weight|Distal muscle weakness|EMG abnormality|Epidermolysis bullosa dystrophica inversa, autosomal recessive|Failure to thrive|Hyperpigmentation of the skin|Microcephaly|Nail dystrophy|Scarring|Scarring alopecia of scalp|Short stature|not provided	Pathogenic(Last reviewed: Jun 14, 2017)	Disease	Y
COL9A1	NM_001851.4(COL9A1):c.1862A>G (p.Gln621Arg)	VAR_026464	258353	Multiple Epiphyseal Dysplasia, Dominant|Stickler Syndrome, Recessive|not specified	Benign(Last reviewed: Sep 30, 2016)	Polymorphism	Y
COL9A1	NM_001851.4(COL9A1):c.1015T>C (p.Ser339Pro)	VAR_026463	258335	Multiple Epiphyseal Dysplasia, Dominant|Stickler Syndrome, Recessive|not specified	Benign(Last reviewed: Sep 29, 2016)	Polymorphism	Y
COL9A1	NM_001851.4(COL9A1):c.2299A>G (p.Met767Val)	VAR_055669	258358	Multiple Epiphyseal Dysplasia, Dominant|Stickler Syndrome, Recessive|not specified	Benign/Likely benign(Last reviewed: Oct 06, 2016)	Polymorphism	Y
COL9A2	NM_001852.3(COL9A2):c.977A>G (p.Gln326Arg)	VAR_012659	258399	Multiple Epiphyseal Dysplasia, Dominant|Stickler Syndrome, Recessive|not specified	Benign(Last reviewed: Sep 29, 2016)	Polymorphism	Y
COL9A2	NM_001852.3(COL9A2):c.737C>T (p.Thr246Met)	VAR_026465	258393	Multiple Epiphyseal Dysplasia, Dominant|Stickler Syndrome, Recessive|not specified	Benign/Likely benign(Last reviewed: Oct 11, 2016)	Polymorphism	Y
COL9A2	NM_001852.3(COL9A2):c.1003C>G (p.Leu335Val)	VAR_026466	258364	Multiple Epiphyseal Dysplasia, Dominant|Stickler Syndrome, Recessive|not specified	Benign/Likely benign(Last reviewed: Oct 06, 2016)	Polymorphism	Y
COL9A2	NM_001852.3(COL9A2):c.1741G>A (p.Val581Ile)	VAR_020014	196620	Multiple Epiphyseal Dysplasia, Dominant|Stickler Syndrome, Recessive|not specified	Benign/Likely benign(Last reviewed: Oct 10, 2016)	Polymorphism	Y
COL9A3	NM_001853.3(COL9A3):c.308G>A (p.Arg103Gln)	VAR_026467	197734	Multiple Epiphyseal Dysplasia, Dominant|not specified	Benign/Likely benign(Last reviewed: Jun 14, 2016)	Polymorphism	Y
COL9A3	NM_001853.3(COL9A3):c.280C>T (p.Pro94Ser)	VAR_048808	258422	Multiple Epiphyseal Dysplasia, Dominant|not specified	Benign/Likely benign(Last reviewed: Jun 14, 2016)	Polymorphism	Y
COL9A3	NM_001853.3(COL9A3):c.887C>T (p.Pro296Leu)	VAR_026469	258436	Multiple Epiphyseal Dysplasia, Dominant|not specified	Benign/Likely benign(Last reviewed: Jun 14, 2016)	Polymorphism	Y
COL9A3	NM_001853.3(COL9A3):c.307C>T (p.Arg103Trp)	VAR_026468	17139	Intervertebral disc disease, susceptibility to|Multiple Epiphyseal Dysplasia, Dominant|not specified	Benign/Likely benign, risk factor(Last reviewed: Jun 14, 2016)	Polymorphism	Y
COL9A3	NM_001853.3(COL9A3):c.1304C>A (p.Ala435Glu)	VAR_026471	195873	Multiple Epiphyseal Dysplasia, Dominant|not specified	Benign(Last reviewed: Jun 14, 2016)	Polymorphism	Y
COLQ	NM_005677.3(COLQ):c.934A>G (p.Ser312Gly)	VAR_048809	128827	Congenital Myasthenic Syndrome, Recessive|not specified	Benign/Likely benign(Last reviewed: Nov 04, 2016)	Polymorphism	Y
COMP	NM_000095.2(COMP):c.2267A>G (p.Gln756Arg)	VAR_066829	255124	Multiple Epiphyseal Dysplasia, Dominant|Pseudoachondroplastic spondyloepiphyseal dysplasia syndrome|not specified	Benign/Likely benign(Last reviewed: Jun 14, 2016)	Polymorphism	Y
COQ8A	NM_020247.4(COQ8A):c.255T>G (p.His85Gln)	VAR_020319	136297	Coenzyme Q10 deficiency, Spinocerebellar Ataxia Type|Spinocerebellar Ataxia, Recessive|not specified	Benign/Likely benign(Last reviewed: Jun 14, 2016)	Polymorphism	Y
COX10	NM_001303.3(COX10):c.83C>T (p.Thr28Ile)	VAR_057371	137004	Cytochrome-c oxidase deficiency|Leigh syndrome|not specified	Benign/Likely benign(Last reviewed: Jun 14, 2016)	Polymorphism	Y
COX10	NM_001303.3(COX10):c.290A>G (p.Tyr97Cys)	VAR_057373	137007	Cytochrome-c oxidase deficiency|Leigh syndrome|not specified	Benign/Likely benign(Last reviewed: Jun 14, 2016)	Polymorphism	Y
COX10	NM_001303.3(COX10):c.184A>T (p.Thr62Ser)	VAR_057372	137006	Cytochrome-c oxidase deficiency|Leigh syndrome|not specified	Benign/Likely benign(Last reviewed: Jun 14, 2016)	Polymorphism	Y
COX4I2	NM_032609.2(COX4I2):c.482G>A (p.Arg161His)	VAR_033815	338039	Exocrine pancreatic insufficiency, dyserythropoietic anemia, and calvarial hyperostosis|not specified	Benign/Likely benign(Last reviewed: Jun 14, 2016)	Polymorphism	Y
CP	NM_000096.3(CP):c.1430C>T (p.Pro477Leu)	VAR_025656	210755	Deficiency of ferroxidase|not specified	Uncertain significance(Last reviewed: Jun 14, 2016)	Polymorphism	N
CPA6	NM_020361.4(CPA6):c.133T>C (p.Phe45Leu)	VAR_024241	128845	Temporal epilepsy, familial|not specified	Benign/Likely benign(Last reviewed: Jun 14, 2016)	Polymorphism	Y
CPA6	NM_020361.4(CPA6):c.746A>G (p.Asn249Ser)	VAR_048597	128847	Temporal epilepsy, familial|not specified	Benign/Likely benign(Last reviewed: Jul 07, 2016)	Polymorphism	Y
CPA6	NM_020361.4(CPA6):c.518C>G (p.Ser173Cys)	VAR_025003	128846	Temporal epilepsy, familial|not specified	Benign/Likely benign(Last reviewed: Jun 14, 2016)	Polymorphism	Y
CPS1	NM_001875.4(CPS1):c.3643A>G (p.Ile1215Val)	VAR_063574	235659	not provided|not specified	Uncertain significance(Last reviewed: Feb 07, 2017)	Disease	N
CPS1	NM_001875.4(CPS1):c.1030A>G (p.Thr344Ala)	VAR_006834	128849	Congenital hyperammonemia, type I|not specified	Benign/Likely benign(Last reviewed: Jun 14, 2016)	Polymorphism	Y
CPS1	NM_001875.4(CPS1):c.1030A>T (p.Thr344Ser)	VAR_061752	281331	Congenital hyperammonemia, type I|not specified	Benign/Likely benign(Last reviewed: Jun 14, 2016)	Polymorphism	Y
CPS1	NM_001875.4(CPS1):c.4217C>A (p.Thr1406Asn)	VAR_017569	128852	Congenital hyperammonemia, type I|not specified	Benign/Likely benign(Last reviewed: Jun 14, 2016)	Polymorphism	Y
CPS1	NM_001875.4(CPS1):c.4126G>A (p.Gly1376Ser)	VAR_017568	258484	not specified	Benign(Last reviewed: Mar 18, 2016)	Polymorphism	Y
CPT1A	NM_001876.3(CPT1A):c.1436C>T (p.Pro479Leu)	VAR_020555	65644	Carnitine palmitoyltransferase I deficiency|not provided	Pathogenic(Last reviewed: Jan 20, 2017)	Disease	Y
CPT1A	NM_001876.3(CPT1A):c.2129G>A (p.Gly710Glu)	VAR_020559	9071	Carnitine palmitoyltransferase I deficiency	Pathogenic/Likely pathogenic(Last reviewed: May 09, 2016)	Disease	Y
CPT2	NM_000098.2(CPT2):c.338C>T (p.Ser113Leu)	VAR_001392	8953	Carnitine palmitoyltransferase II deficiency|Carnitine palmitoyltransferase II deficiency, infantile|Carnitine palmitoyltransferase II deficiency, lethal neonatal|Carnitine palmitoyltransferase II deficiency, lethal neonatal|Carnitine palmitoyltransferase II deficiency, myopathic, stress-induced|Carnitine palmitoyltransferase II deficiency, myopathic, stress-induced|Encephalopathy, acute, infecti…	Pathogenic(Last reviewed: May 18, 2017)	Disease	Y
CPT2	NM_000098.2(CPT2):c.1939A>G (p.Met647Val)	VAR_001400	92433	Carnitine palmitoyltransferase II deficiency|not specified	Benign/Likely benign(Last reviewed: Jun 14, 2016)	Polymorphism	Y
CRB1	NM_201253.2(CRB1):c.3307G>A (p.Gly1103Arg)	VAR_022974	5739	Leber congenital amaurosis 8|Retinitis pigmentosa 12|not provided	Pathogenic(Last reviewed: Apr 01, 2016)	Disease	Y
CRB1	NM_201253.2(CRB1):c.3307G>A (p.Gly1103Arg)	VAR_022974	5739	Leber congenital amaurosis 8|Retinitis pigmentosa 12|not provided	Pathogenic(Last reviewed: Apr 01, 2016)	Disease	Y
CRB1	NM_201253.2(CRB1):c.2462C>T (p.Thr821Met)	VAR_067144	198633	not provided|not specified	Uncertain significance(Last reviewed: Nov 30, 2016)	Polymorphism	N
CRB1	NM_201253.2(CRB1):c.3992G>A (p.Arg1331His)	VAR_022981	99906	Leber congenital amaurosis|Pigmented paravenous chorioretinal atrophy|Retinitis Pigmentosa, Recessive|not provided|not specified	Benign/Likely benign(Last reviewed: Jun 14, 2016)	Polymorphism	Y
CRB1	NM_201253.2(CRB1):c.2306G>A (p.Arg769His)	VAR_022958	99878	Leber congenital amaurosis|Pigmented paravenous chorioretinal atrophy|Retinitis Pigmentosa, Recessive|not provided|not specified	Benign/Likely benign(Last reviewed: Jun 14, 2016)	Polymorphism	Y
CREBBP	NM_004380.2(CREBBP):c.3832G>A (p.Glu1278Lys)	VAR_035080	9433	Rubinstein-Taybi syndrome|not provided	Pathogenic(Last reviewed: Mar 15, 2016)	Disease	Y
CRX	NM_000554.5(CRX):c.196G>A (p.Val66Ile)	VAR_076957	99597	Leber congenital amaurosis|not provided|not specified	Benign/Likely benign(Last reviewed: May 09, 2017)	Polymorphism	Y
CRX	NM_000554.5(CRX):c.365G>A (p.Gly122Asp)	VAR_008282	99604	Cone-Rod Dystrophy, Dominant|Leber congenital amaurosis|Retinitis Pigmentosa, Dominant|not provided|not specified	Benign/Likely benign(Last reviewed: Nov 20, 2016)	Polymorphism	Y
CRX	NM_000554.5(CRX):c.472G>A (p.Ala158Thr)	VAR_007948	99608	Cone-Rod Dystrophy, Dominant|Leber congenital amaurosis|Retinitis Pigmentosa, Dominant|not provided|not specified	Benign/Likely benign(Last reviewed: Jun 14, 2016)	Polymorphism	Y
CRYBB3	NM_004076.4(CRYBB3):c.314G>A (p.Arg105Gln)	VAR_025277	259228	Congenital nuclear cataract|not specified	Benign/Likely benign(Last reviewed: Jun 14, 2016)	Polymorphism	Y
CRYBB3	NM_004076.4(CRYBB3):c.337C>G (p.His113Asp)	VAR_025278	259229	Congenital nuclear cataract|not specified	Benign(Last reviewed: Jun 14, 2016)	Polymorphism	Y
CTC1	NM_025099.5(CTC1):c.2458A>G (p.Ile820Val)	VAR_032282	128860	Dyskeratosis Congenita, Recessive|not specified	Benign/Likely benign(Last reviewed: Aug 08, 2016)	Polymorphism	Y
CTC1	NM_025099.5(CTC1):c.3013A>G (p.Ile1005Val)	VAR_032283	128861	Dyskeratosis Congenita, Recessive|not specified	Benign/Likely benign(Last reviewed: Aug 08, 2016)	Polymorphism	Y
CTF1	NM_001330.3(CTF1):c.274G>A (p.Ala92Thr)	VAR_014938	44177	Primary familial hypertrophic cardiomyopathy|not specified	Uncertain significance(Last reviewed: Mar 16, 2015)	Polymorphism	N
CTNS	NM_004937.2(CTNS):c.589G>A (p.Gly197Arg)	VAR_010682	4451	Cystinosis, ocular nonnephropathic|Nephropathic cystinosis|not provided	Pathogenic/Likely pathogenic(Last reviewed: May 22, 2017)	Disease	Y
CTNS	NM_001031681.2(CTNS):c.779C>T (p.Thr260Ile)	VAR_060371	257157	Cystinosis|Nephropathic cystinosis|not specified	Benign(Last reviewed: Jun 14, 2016)	Polymorphism	Y
CTRC	NM_007272.2(CTRC):c.110G>A (p.Arg37Gln)	VAR_043518	240762	Hereditary pancreatitis	Likely benign(Last reviewed: Dec 24, 2016)	Polymorphism	Y
CTRC	NM_007272.2(CTRC):c.514A>G (p.Lys172Glu)	VAR_043521	260158	Hereditary pancreatitis|not specified	Benign(Last reviewed: Jan 23, 2017)	Polymorphism	Y
CTSC	NM_001814.5(CTSC):c.1357A>G (p.Ile453Val)	VAR_016946	198470	Haim-Munk syndrome|Papillon-LefÃ¨vre syndrome|not specified	Benign/Likely benign(Last reviewed: Jun 14, 2016)	Polymorphism	Y
CTSD	NM_001909.4(CTSD):c.844G>A (p.Gly282Arg)	VAR_058490	128877	Neuronal Ceroid-Lipofuscinosis, Dominant/Recessive|Neuronal ceroid lipofuscinosis|not provided|not specified	Benign/Likely benign(Last reviewed: Jan 10, 2017)	Polymorphism	Y
CTSD	NM_001909.4(CTSD):c.173C>T (p.Ala58Val)	VAR_011621	128873	Neuronal Ceroid-Lipofuscinosis, Dominant/Recessive|not specified	Benign/Likely benign(Last reviewed: Jun 14, 2016)	Polymorphism	Y
CUBN	NM_001081.3(CUBN):c.8950A>G (p.Ile2984Val)	VAR_025298	299389	Megaloblastic anemia|not specified	Benign/Likely benign(Last reviewed: Oct 14, 2016)	Polymorphism	Y
CUBN	NM_001081.3(CUBN):c.10295C>G (p.Thr3432Ser)	VAR_055714	299362	Megaloblastic anemia|not specified	Benign(Last reviewed: May 29, 2017)	Polymorphism	Y
CUBN	NM_001081.3(CUBN):c.2188C>T (p.His730Tyr)	VAR_047445	299511	Megaloblastic anemia|not specified	Benign(Last reviewed: May 29, 2017)	Polymorphism	Y
CUL3	NM_003590.4(CUL3):c.1699G>A (p.Val567Ile)	VAR_017195	259091	Pseudohypoaldosteronism, Type I, Dominant|not specified	Benign(Last reviewed: Jun 14, 2016)	Polymorphism	Y
CUL7	NM_014780.4(CUL7):c.3041T>G (p.Leu1014Arg)	VAR_026122	194657	Inborn genetic diseases|Three M syndrome 1|not provided	Pathogenic/Likely pathogenic(Last reviewed: Feb 14, 2017)	Disease	Y
CUL7	NM_014780.4(CUL7):c.1846A>G (p.Ser616Gly)	VAR_048841	356844	Three M syndrome|not provided	Likely benign(Last reviewed: Feb 23, 2017)	Polymorphism	Y
CUL7	NM_014780.4(CUL7):c.2438A>G (p.Gln813Arg)	VAR_026121	260436	Three M syndrome|not specified	Benign(Last reviewed: Jun 14, 2016)	Polymorphism	Y
CYB5R3	NM_000398.6(CYB5R3):c.350C>G (p.Thr117Ser)	VAR_010751	244	NADH-CYTOCHROME b5 REDUCTASE POLYMORPHISM|not specified	Benign(Last reviewed: Apr 17, 2017)	Polymorphism	Y
CYBA	NM_000101.3(CYBA):c.521T>C (p.Val174Ala)	VAR_054801	198042	not specified	Benign(Last reviewed: Apr 15, 2016)	Polymorphism	Y
CYP11B1	NM_000497.3(CYP11B1):c.743C>T (p.Thr248Ile)	VAR_048462	362162	Congenital adrenal hyperplasia|Hyperaldosteronism, familial, type I|not specified	Likely benign(Last reviewed: Aug 22, 2016)	Polymorphism	Y
CYP11B2	NM_000498.3(CYP11B2):c.1303G>A (p.Gly435Ser)	VAR_014156	362192	Corticosterone methyloxidase type 2 deficiency|not specified	Benign(Last reviewed: Jun 14, 2016)	Polymorphism	Y
CYP17A1	NM_000102.3(CYP17A1):c.286C>T (p.Arg96Trp)	VAR_022746	1785	Complete combined 17-alpha-hydroxylase/17,20-lyase deficiency|Deficiency of steroid 17-alpha-monooxygenase|not provided	Pathogenic(Last reviewed: Sep 26, 2016)	Disease	Y
CYP19A1	NM_031226.2(CYP19A1):c.790C>T (p.Arg264Cys)	VAR_018406	137064	Aromatase deficiency|not specified	Benign/Likely benign(Last reviewed: Jun 14, 2016)	Polymorphism	Y
CYP1B1	NM_000104.3(CYP1B1):c.958G>T (p.Val320Leu)	VAR_054247	225333	Glaucoma, congenital|not specified	Uncertain significance(Last reviewed: May 17, 2016)	Disease	N
CYP1B1	NM_000104.3(CYP1B1):c.142C>G (p.Arg48Gly)	VAR_011752	92436	Primary congenital glaucoma|not specified	Benign(Last reviewed: Jun 14, 2016)	Polymorphism	Y
CYP1B1	NM_000104.3(CYP1B1):c.355G>T (p.Ala119Ser)	VAR_011753	92437	Primary congenital glaucoma|not specified	Benign(Last reviewed: Jun 14, 2016)	Polymorphism	Y
CYP1B1	NM_000104.3(CYP1B1):c.1358A>G (p.Asn453Ser)	VAR_008355	166969	Primary congenital glaucoma|not specified	Benign/Likely benign(Last reviewed: Jun 14, 2016)	Polymorphism	Y
CYP27A1	NM_000784.3(CYP27A1):c.1183C>T (p.Arg395Cys)	VAR_001303	4255	Cholestanol storage disease|not provided	Pathogenic(Last reviewed: Sep 13, 2016)	Disease	Y
CYP27B1	NM_000785.3(CYP27B1):c.1166G>A (p.Arg389His)	VAR_016959	1669	Vitamin D-Dependent Rickets|Vitamin D-dependent rickets, type 1|not provided	Pathogenic/Likely pathogenic(Last reviewed: Sep 20, 2016)	Disease	Y
CYP4V2	NM_207352.3(CYP4V2):c.775C>A (p.Gln259Lys)	VAR_033821	263297	Bietti crystalline corneoretinal dystrophy|Corneal Dystrophy, Recessive|not specified	Benign(Last reviewed: Jun 14, 2016)	Polymorphism	Y
CYP4V2	NM_207352.3(CYP4V2):c.823G>A (p.Glu275Lys)	VAR_055379	263298	Bietti crystalline corneoretinal dystrophy|Corneal Dystrophy, Recessive|not specified	Benign/Likely benign(Last reviewed: Jun 14, 2016)	Polymorphism	Y
CYP7B1	NM_004820.4(CYP7B1):c.1250G>A (p.Arg417His)	VAR_044385	6103	Spastic paraplegia|Spastic paraplegia 5A|not provided	Pathogenic(Last reviewed: Jun 16, 2016)	Disease	Y
CYP7B1	NM_004820.4(CYP7B1):c.889A>G (p.Thr297Ala)	VAR_075512	120179	Spastic paraplegia|Spastic paraplegia 5A|not provided	Pathogenic/Likely pathogenic(Last reviewed: Nov 24, 2016)	Disease	Y
CYP7B1	NM_004820.4(CYP7B1):c.971G>A (p.Arg324His)	VAR_075514	363582	Congenital Bile Acid Synthesis Defect|Spastic Paraplegia, Recessive|Spastic paraplegia|not specified	Benign/Likely benign(Last reviewed: Jan 21, 2017)	Polymorphism	Y
CYP7B1	NM_004820.4(CYP7B1):c.56T>C (p.Leu19Pro)	VAR_075505	193293	Congenital Bile Acid Synthesis Defect|Spastic Paraplegia, Recessive|Spastic paraplegia|not specified	Benign/Likely benign(Last reviewed: Jan 10, 2017)	Polymorphism	Y
D2HGDH	NM_152783.4(D2HGDH):c.1082C>T (p.Ala361Val)	VAR_050434	158406	D-2-hydroxyglutaric aciduria|not specified	Benign/Likely benign(Last reviewed: Jun 14, 2016)	Polymorphism	Y
D2HGDH	NM_152783.4(D2HGDH):c.1012G>A (p.Val338Ile)	VAR_050433	158404	D-2-hydroxyglutaric aciduria|not specified	Benign/Likely benign(Last reviewed: Jun 14, 2016)	Polymorphism	Y
D2HGDH	NM_152783.4(D2HGDH):c.43C>G (p.Arg15Gly)	VAR_025889	158420	D-2-hydroxyglutaric aciduria|not provided|not specified	Benign/Likely benign(Last reviewed: Jun 14, 2016)	Polymorphism	Y
DARS2	NM_018122.4(DARS2):c.587A>G (p.Lys196Arg)	VAR_034525	21547	Leukoencephalopathy with Brainstem and Spinal Cord Involvement and Lactate Elevation|not specified	Benign/Likely benign(Last reviewed: Jun 14, 2016)	Polymorphism	Y
DCLRE1C	NM_001033855.2(DCLRE1C):c.728A>G (p.His243Arg)	VAR_048893	257180	Histiocytic medullary reticulosis|not specified	Benign/Likely benign(Last reviewed: Jun 14, 2016)	Polymorphism	Y
DCTN1	NM_004082.4(DCTN1):c.859C>A (p.Leu287Met)	VAR_048677	259241	Distal hereditary motor neuronopathy|Perry syndrome|not specified	Benign(Last reviewed: Jun 14, 2016)	Polymorphism	Y
DCTN1	NM_004082.4(DCTN1):c.1484G>A (p.Arg495Gln)	VAR_048678	259232	Distal hereditary motor neuronopathy|Perry syndrome|not specified	Benign/Likely benign(Last reviewed: Jun 14, 2016)	Polymorphism	Y
DCTN1	NM_004082.4(DCTN1):c.586A>G (p.Ile196Val)	VAR_076920	337096	Distal hereditary motor neuronopathy|Perry syndrome|not specified	Benign/Likely benign(Last reviewed: Sep 07, 2016)	Polymorphism	Y
DCX	NM_178151.2(DCX):c.574C>T (p.Arg192Trp)	VAR_007833	11598	Heterotopia|Lissencephaly, X-linked|Subcortical laminar heterotopia, X-linked|not provided	Pathogenic(Last reviewed: Dec 22, 2016)	Disease	Y
DCX	NM_178151.2(DCX):c.574C>T (p.Arg192Trp)	VAR_007833	11598	Heterotopia|Lissencephaly, X-linked|Subcortical laminar heterotopia, X-linked|not provided	Pathogenic(Last reviewed: Dec 22, 2016)	Disease	Y
DCX	NM_178151.2(DCX):c.556C>T (p.Arg186Cys)	VAR_007831	158476	Heterotopia|not provided	Pathogenic(Last reviewed: Mar 30, 2017)	Disease	Y
DCX	NM_178151.2(DCX):c.572C>G (p.Pro191Arg)	VAR_007832	158481	Heterotopia|not provided	Pathogenic(Last reviewed: May 30, 2017)	Disease	Y
DDC	NM_000790.3(DDC):c.629C>T (p.Pro210Leu)	VAR_014789	235399	Deficiency of aromatic-L-amino-acid decarboxylase|not provided	Benign/Likely benign(Last reviewed: Jun 14, 2016)	Polymorphism	Y
DDX3X	NM_001193416.2(DDX3X):c.1463G>A (p.Arg488His)	VAR_075744	207817	not provided	Pathogenic/Likely pathogenic(Last reviewed: Jun 30, 2017)	Disease	Y
DEPDC5	NM_001242896.1(DEPDC5):c.3311C>T (p.Ser1104Leu)	VAR_069266	210846	Epilepsy, familial focal, with variable foci 1|not specified	Uncertain significance(Last reviewed: Sep 05, 2016)	Disease	N
DEPDC5	NM_001242896.1(DEPDC5):c.1922C>T (p.Ala641Val)	VAR_053953	257659	Epilepsy, familial focal, with variable foci 1|not specified	Benign(Last reviewed: Jan 18, 2017)	Polymorphism	Y
DES	NM_001927.3(DES):c.1360C>T (p.Arg454Trp)	VAR_042462	66402	Dilated cardiomyopathy|Dilated cardiomyopathy 1I|Myofibrillar myopathy 1|Primary familial hypertrophic cardiomyopathy|not provided	Pathogenic/Likely pathogenic(Last reviewed: Feb 09, 2017)	Disease	Y
DES	NM_001927.3(DES):c.38C>T (p.Ser13Phe)	VAR_067208	44260	Myofibrillar myopathy 1|Primary dilated cardiomyopathy|not provided	Pathogenic(Last reviewed: Jul 22, 2015)	Disease	Y
DHCR7	NM_001360.2(DHCR7):c.151C>T (p.Pro51Ser)	VAR_012717	93712	Smith-Lemli-Opitz syndrome|not provided	Pathogenic(Last reviewed: Oct 18, 2016)	Disease	Y
DHCR7	NM_001360.2(DHCR7):c.866C>T (p.Thr289Ile)	VAR_012725	6789	Smith-Lemli-Opitz syndrome|not provided	Pathogenic/Likely pathogenic(Last reviewed: May 02, 2016)	Disease	Y
DHCR7	NM_001360.2(DHCR7):c.1055G>A (p.Arg352Gln)	VAR_023171	6795	Smith-Lemli-Opitz syndrome|not provided	Pathogenic(Last reviewed: Sep 19, 2016)	Disease	Y
DHCR7	NM_001360.2(DHCR7):c.841G>A (p.Val281Met)	VAR_023165	93724	Smith-Lemli-Opitz syndrome|not provided	Pathogenic(Last reviewed: Jun 02, 2017)	Disease	Y
DHCR7	NM_001360.2(DHCR7):c.278C>T (p.Thr93Met)	VAR_012718	6783	Abnormality of brain morphology|Smith-Lemli-Opitz syndrome|not provided	Pathogenic/Likely pathogenic(Last reviewed: Jun 09, 2017)	Disease	Y
DHCR7	NM_001360.2(DHCR7):c.724C>T (p.Arg242Cys)	VAR_023162	21275	Smith-Lemli-Opitz syndrome|not provided	Pathogenic(Last reviewed: May 26, 2017)	Disease	Y
DHCR7	NM_001360.2(DHCR7):c.1228G>A (p.Gly410Ser)	VAR_012730	21272	Smith-Lemli-Opitz syndrome|not provided	Pathogenic(Last reviewed: Sep 13, 2016)	Disease	Y
DHDDS	NM_024887.3(DHDDS):c.124A>G (p.Lys42Glu)	VAR_065356	30709	Retinitis pigmentosa 59	Pathogenic(Last reviewed: Oct 18, 2016)	Disease	Y
DHODH	NM_001361.4(DHODH):c.403C>T (p.Arg135Cys)	VAR_062413	16801	Miller syndrome|not provided	Pathogenic/Likely pathogenic(Last reviewed: Oct 03, 2016)	Disease	Y
DHODH	NM_001361.4(DHODH):c.19A>C (p.Lys7Gln)	VAR_022094	128895	Miller syndrome|not specified	Benign/Likely benign(Last reviewed: Jun 14, 2016)	Polymorphism	Y
DHTKD1	NM_018706.6(DHTKD1):c.2185G>A (p.Gly729Arg)	VAR_069585	39564	2-aminoadipic 2-oxoadipic aciduria|2-aminoadipic 2-oxoadipic aciduria|not provided|not specified	Pathogenic/Likely pathogenic(Last reviewed: Mar 11, 2017)	Disease	Y
DIS3L2	NM_152383.4(DIS3L2):c.34C>T (p.Pro12Ser)	VAR_038059	334928	Renal hamartomas nephroblastomatosis and fetal gigantism	Benign/Likely benign(Last reviewed: Jan 30, 2017)	Polymorphism	Y
DISP1	NM_032890.4(DISP1):c.307G>A (p.Glu103Lys)	VAR_037077	262129	not specified	Benign(Last reviewed: Aug 25, 2016)	Polymorphism	Y
DLAT	NM_001931.4(DLAT):c.626A>G (p.Gln209Arg)	VAR_047413	137090	Pyruvate dehydrogenase complex deficiency|not specified	Benign/Likely benign(Last reviewed: Jun 14, 2016)	Polymorphism	Y
DLD	NM_000108.4(DLD):c.685G>T (p.Gly229Cys)	VAR_015820	11966	DLD-Related Disorders|Maple syrup urine disease, type 3|not provided	Pathogenic(Last reviewed: Feb 28, 2017)	Disease	Y
DLL3	NM_016941.3(DLL3):c.653T>C (p.Leu218Pro)	VAR_016776	41379	Jarcho-Levin syndrome|Spondylocostal dysostosis 1, autosomal recessive|Syndactyly|not specified	Benign(Last reviewed: Jun 14, 2016)	Polymorphism	Y
DLL3	NM_016941.3(DLL3):c.425T>A (p.Leu142Gln)	VAR_046783	41377	Jarcho-Levin syndrome|Spondylocostal dysostosis 1, autosomal recessive|Syndactyly|not specified	Benign/Likely benign(Last reviewed: Jun 14, 2016)	Polymorphism	Y
DLL3	NM_016941.3(DLL3):c.515T>G (p.Phe172Cys)	VAR_046784	41378	Jarcho-Levin syndrome|Spondylocostal dysostosis 1, autosomal recessive|Syndactyly|not specified	Benign(Last reviewed: Jun 14, 2016)	Polymorphism	Y
DMD	NM_004006.2(DMD):c.5016T>A (p.Asn1672Lys)	VAR_023542	94648	Cardiovascular phenotype|Dilated cardiomyopathy 3B|Duchenne muscular dystrophy|not specified	Benign/Likely benign(Last reviewed: Jan 18, 2017)	Disease	N
DMD	NM_004006.2(DMD):c.6322C>T (p.Arg2108Cys)	VAR_057647	94703	Cardiovascular phenotype|Dilated cardiomyopathy 3B|Duchenne muscular dystrophy|not specified	Benign/Likely benign(Last reviewed: Jan 21, 2017)	Polymorphism	Y
DMD	NM_004006.2(DMD):c.2143A>T (p.Thr715Ser)	VAR_057644	94494	Cardiovascular phenotype|Duchenne muscular dystrophy|not provided|not specified	Benign(Last reviewed: May 04, 2017)	Polymorphism	Y
DMD	NM_004006.2(DMD):c.1095A>C (p.Gln365His)	VAR_005151	282487	Duchenne muscular dystrophy|not specified	Benign/Likely benign(Last reviewed: Nov 24, 2016)	Polymorphism	Y
DMD	NM_004006.2(DMD):c.3734C>T (p.Thr1245Ile)	VAR_005158	94604	Cardiovascular phenotype|Dilated cardiomyopathy 3B|Duchenne muscular dystrophy|not specified	Benign/Likely benign(Last reviewed: Jan 23, 2017)	Polymorphism	Y
DMD	NM_004006.2(DMD):c.6463C>T (p.Arg2155Trp)	VAR_005164	94741	Cardiovascular phenotype|Dilated cardiomyopathy 3B|Duchenne muscular dystrophy|not specified	Benign/Likely benign(Last reviewed: Jan 18, 2017)	Polymorphism	Y
DMD	NM_004006.2(DMD):c.8810A>G (p.Gln2937Arg)	VAR_005171	137106	Duchenne muscular dystrophy|not specified	Benign(Last reviewed: Jan 23, 2017)	Polymorphism	Y
DMD	NM_004006.2(DMD):c.5234G>A (p.Arg1745His)	VAR_005162	94657	Cardiovascular phenotype|Dilated cardiomyopathy 3B|not specified	Benign/Likely benign(Last reviewed: Jun 14, 2016)	Polymorphism	Y
DMD	NM_004006.2(DMD):c.4162T>G (p.Phe1388Val)	VAR_057646	94615	Cardiovascular phenotype|Dilated cardiomyopathy 3B|Duchenne muscular dystrophy|not provided|not specified	Benign/Likely benign(Last reviewed: Jan 18, 2017)	Polymorphism	Y
DMD	NM_004006.2(DMD):c.1225A>T (p.Thr409Ser)	VAR_057642	94453	Dilated cardiomyopathy 3B|Duchenne muscular dystrophy|not specified	Benign/Likely benign(Last reviewed: Nov 06, 2016)	Polymorphism	Y
DMD	NM_004006.2(DMD):c.1997C>T (p.Ser666Leu)	VAR_062110	94487	Cardiovascular phenotype|Duchenne muscular dystrophy|not specified	Benign(Last reviewed: May 22, 2017)	Polymorphism	Y
DMD	NM_004006.2(DMD):c.3406A>T (p.Thr1136Ser)	VAR_057645	94587	Cardiovascular phenotype|Dilated cardiomyopathy|Dilated cardiomyopathy 3B|Duchenne muscular dystrophy|not specified	Benign/Likely benign(Last reviewed: Jan 03, 2017)	Polymorphism	Y
DMD	NM_004006.2(DMD):c.1718C>T (p.Ala573Val)	VAR_057643	226566	Cardiovascular phenotype|Duchenne muscular dystrophy|not specified	Benign(Last reviewed: Sep 28, 2016)	Polymorphism	Y
DNAAF1	NM_178452.5(DNAAF1):c.1505C>T (p.Pro502Leu)	VAR_047665	226575	Primary ciliary dyskinesia|not specified	Benign/Likely benign(Last reviewed: Jun 14, 2016)	Polymorphism	Y
DNAAF1	NM_178452.5(DNAAF1):c.1178A>G (p.Lys393Arg)	VAR_047663	226572	Primary ciliary dyskinesia|not specified	Benign/Likely benign(Last reviewed: Jun 14, 2016)	Polymorphism	Y
DNAAF1	NM_178452.5(DNAAF1):c.1898T>C (p.Leu633Ser)	VAR_047667	163087	Primary ciliary dyskinesia|not specified	Benign(Last reviewed: Jun 14, 2016)	Polymorphism	Y
DNAAF1	NM_178452.5(DNAAF1):c.1975C>G (p.Leu659Val)	VAR_047669	163088	Primary ciliary dyskinesia|not specified	Benign/Likely benign(Last reviewed: Jun 14, 2016)	Polymorphism	Y
DNAAF1	NM_178452.5(DNAAF1):c.1976T>C (p.Leu659Pro)	VAR_047668	163089	Primary ciliary dyskinesia|not specified	Benign(Last reviewed: Jun 14, 2016)	Polymorphism	Y
DNAAF1	NM_178452.5(DNAAF1):c.2024G>C (p.Ser675Thr)	VAR_047670	163090	Primary ciliary dyskinesia|not specified	Benign(Last reviewed: Jun 14, 2016)	Polymorphism	Y
DNAAF1	NM_178452.5(DNAAF1):c.1161C>G (p.Asp387Glu)	VAR_047662	226571	Primary ciliary dyskinesia|not specified	Benign/Likely benign(Last reviewed: Jan 18, 2017)	Polymorphism	Y
DNAAF1	NM_178452.5(DNAAF1):c.2134C>G (p.Pro712Ala)	VAR_047672	242164	Primary ciliary dyskinesia|not specified	Benign(Last reviewed: Dec 20, 2016)	Polymorphism	Y
DNAAF1	NM_178452.5(DNAAF1):c.2107G>A (p.Gly703Arg)	VAR_047671	262950	Primary ciliary dyskinesia|not specified	Benign(Last reviewed: Apr 29, 2016)	Polymorphism	Y
DNAAF1	NM_178452.5(DNAAF1):c.1296G>C (p.Glu432Asp)	VAR_047664	226573	Primary ciliary dyskinesia|not specified	Benign/Likely benign(Last reviewed: Jun 14, 2016)	Polymorphism	Y
DNAAF2	NM_018139.2(DNAAF2):c.186G>C (p.Glu62Asp)	VAR_057788	95893	Primary ciliary dyskinesia|not specified	Benign(Last reviewed: Jun 14, 2016)	Polymorphism	Y
DNAAF2;MGAT2	NM_018139.2(DNAAF2):c.2303A>G (p.Asp768Gly)	VAR_024309	163091	Congenital disorder of glycosylation|Primary ciliary dyskinesia|not specified	Benign(Last reviewed: Jun 14, 2016)	Polymorphism	Y
DNAAF4	NM_130810.3(DNAAF4):c.572A>G (p.Glu191Gly)	VAR_017385	262315	not specified	Benign(Last reviewed: Mar 29, 2016)	Polymorphism	Y
DNAAF4	NM_130810.3(DNAAF4):c.1259C>G (p.Ser420Cys)	VAR_017386	262314	not specified	Benign(Last reviewed: Mar 29, 2016)	Polymorphism	Y
DNAAF5	NM_017802.3(DNAAF5):c.2228G>A (p.Arg743Lys)	VAR_060464	260932	not specified	Benign(Last reviewed: Mar 29, 2016)	Polymorphism	Y
DNAAF5	NM_017802.3(DNAAF5):c.1895T>C (p.Val632Ala)	VAR_056911	260930	not specified	Benign(Last reviewed: Mar 29, 2016)	Polymorphism	Y
DNAAF5	NM_017802.3(DNAAF5):c.1678C>T (p.Arg560Cys)	VAR_060463	241197	Primary ciliary dyskinesia|not specified	Benign/Likely benign(Last reviewed: Dec 15, 2016)	Polymorphism	Y
DNAH11	NM_001277115.1(DNAH11):c.3112A>G (p.Thr1038Ala)	VAR_013855	163100	Primary ciliary dyskinesia|not specified	Benign(Last reviewed: Jun 14, 2016)	Polymorphism	Y
DNAH11	NM_001277115.1(DNAH11):c.3068T>C (p.Val1023Ala)	VAR_013854	178725	Primary ciliary dyskinesia|not specified	Benign/Likely benign(Last reviewed: Jun 14, 2016)	Polymorphism	Y
DNAH11	NM_001277115.1(DNAH11):c.12509C>T (p.Thr4170Ile)	VAR_013863	178737	Primary ciliary dyskinesia|not specified	Benign/Likely benign(Last reviewed: Jun 14, 2016)	Polymorphism	Y
DNAH11	NM_001277115.1(DNAH11):c.1916A>G (p.Gln639Arg)	VAR_013852	163096	Primary ciliary dyskinesia|not specified	Benign/Likely benign(Last reviewed: Jun 14, 2016)	Polymorphism	Y
DNAH11	NM_001277115.1(DNAH11):c.3946A>G (p.Met1316Val)	VAR_042945	238914	Primary ciliary dyskinesia|not provided|not specified	Benign/Likely benign(Last reviewed: Aug 28, 2017)	Polymorphism	Y
DNAH11	NM_001277115.1(DNAH11):c.4904A>G (p.Asp1635Gly)	VAR_013856	163105	Primary ciliary dyskinesia|not specified	Benign/Likely benign(Last reviewed: Jan 24, 2017)	Polymorphism	Y
DNAH11	NM_001277115.1(DNAH11):c.11272T>C (p.Ser3758Pro)	VAR_013862	163125	Primary ciliary dyskinesia|not specified	Benign/Likely benign(Last reviewed: Jan 24, 2017)	Polymorphism	Y
DNAH11	NM_001277115.1(DNAH11):c.7756T>C (p.Tyr2586His)	VAR_060141	163111	Primary ciliary dyskinesia|not specified	Benign/Likely benign(Last reviewed: Jan 18, 2017)	Polymorphism	Y
DNAH11	NM_001277115.1(DNAH11):c.10399G>A (p.Ala3467Thr)	VAR_013860	178732	Primary ciliary dyskinesia|not specified	Benign(Last reviewed: Jun 14, 2016)	Polymorphism	Y
DNAH11	NM_001277115.1(DNAH11):c.101A>T (p.Glu34Val)	VAR_042944	93683	Primary ciliary dyskinesia|not specified	Benign(Last reviewed: Jun 14, 2016)	Polymorphism	Y
DNAH11	NM_001277115.1(DNAH11):c.11122G>T (p.Val3708Leu)	VAR_013861	163121	Primary ciliary dyskinesia|not specified	Benign(Last reviewed: Jun 14, 2016)	Polymorphism	Y
DNAH11	NM_001277115.1(DNAH11):c.1961C>G (p.Ser654Cys)	VAR_013853	163098	Primary ciliary dyskinesia|not specified	Benign/Likely benign(Last reviewed: Jun 14, 2016)	Polymorphism	Y
DNAH11	NM_001277115.1(DNAH11):c.12493A>G (p.Met4165Val)	VAR_042946	178735	Primary ciliary dyskinesia|not specified	Benign(Last reviewed: Jun 14, 2016)	Polymorphism	Y
DNAH11	NM_001277115.1(DNAH11):c.7901A>G (p.Asn2634Ser)	VAR_013857	163113	Primary ciliary dyskinesia|not specified	Benign(Last reviewed: Jun 14, 2016)	Polymorphism	Y
DNAH5	NM_001369.2(DNAH5):c.7388A>G (p.Gln2463Arg)	VAR_019606	163142	Primary ciliary dyskinesia|not specified	Benign(Last reviewed: Jun 14, 2016)	Polymorphism	Y
DNAH5	NM_001369.2(DNAH5):c.8586G>T (p.Leu2862Phe)	VAR_019607	178745	Primary ciliary dyskinesia|not specified	Benign/Likely benign(Last reviewed: Jun 14, 2016)	Polymorphism	Y
DNAH5	NM_001369.2(DNAH5):c.71G>A (p.Gly24Glu)	VAR_019604	163159	Primary ciliary dyskinesia|not specified	Benign(Last reviewed: Jun 14, 2016)	Polymorphism	Y
DNAH5	NM_001369.2(DNAH5):c.1672A>G (p.Thr558Ala)	VAR_019605	163157	Primary ciliary dyskinesia|not specified	Benign(Last reviewed: Jun 14, 2016)	Polymorphism	Y
DNAH5	NM_001369.2(DNAH5):c.3241A>G (p.Met1081Val)	VAR_027905	178752	Primary ciliary dyskinesia|not specified	Benign/Likely benign(Last reviewed: Jan 05, 2017)	Polymorphism	Y
DNAH5	NM_001369.2(DNAH5):c.3016A>G (p.Ser1006Gly)	VAR_027904	163155	Primary ciliary dyskinesia|not specified	Benign/Likely benign(Last reviewed: Jan 05, 2017)	Polymorphism	Y
DNAH5	NM_001369.2(DNAH5):c.11372C>T (p.Thr3791Ile)	VAR_027906	178744	Primary ciliary dyskinesia|not specified	Benign/Likely benign(Last reviewed: Jun 14, 2016)	Polymorphism	Y
DNAH5	NM_001369.2(DNAH5):c.12658A>G (p.Thr4220Ala)	VAR_019610	178741	Primary ciliary dyskinesia|not specified	Benign/Likely benign(Last reviewed: Jun 14, 2016)	Polymorphism	Y
DNAH5	NM_001369.2(DNAH5):c.12401C>T (p.Ala4134Val)	VAR_019609	178743	Primary ciliary dyskinesia|not specified	Benign(Last reviewed: Jun 14, 2016)	Polymorphism	Y
DNAH5	NM_001369.2(DNAH5):c.36T>G (p.His12Gln)	VAR_019603	178760	Primary ciliary dyskinesia|not specified	Benign(Last reviewed: Jun 14, 2016)	Polymorphism	Y
DNAH5	NM_001369.2(DNAH5):c.1772T>G (p.Leu591Arg)	VAR_053840	226596	Primary ciliary dyskinesia|not specified	Benign/Likely benign(Last reviewed: Jan 20, 2017)	Polymorphism	Y
DNAH5	NM_001369.2(DNAH5):c.7274G>A (p.Arg2425His)	VAR_053844	226606	Primary ciliary dyskinesia|not specified	Benign/Likely benign(Last reviewed: Nov 24, 2016)	Polymorphism	Y
DNAH5	NM_001369.2(DNAH5):c.13348A>G (p.Ile4450Val)	VAR_019611	163132	Primary ciliary dyskinesia|not specified	Benign(Last reviewed: Jun 14, 2016)	Polymorphism	Y
DNAH5	NM_001369.2(DNAH5):c.2296A>T (p.Ile766Leu)	VAR_027903	178753	Primary ciliary dyskinesia|not specified	Benign(Last reviewed: Jun 14, 2016)	Polymorphism	Y
DNAI1	NM_012144.3(DNAI1):c.22G>T (p.Ala8Ser)	VAR_016774	178761	Primary ciliary dyskinesia|not specified	Benign/Likely benign(Last reviewed: Jun 14, 2016)	Polymorphism	Y
DNAI1	NM_012144.3(DNAI1):c.1003G>A (p.Val335Ile)	VAR_033878	163164	Primary ciliary dyskinesia|not specified	Benign/Likely benign(Last reviewed: Jun 14, 2016)	Polymorphism	Y
DNAI1	NM_012144.3(DNAI1):c.1460T>G (p.Val487Gly)	VAR_033879	163165	Primary ciliary dyskinesia|not specified	Benign/Likely benign(Last reviewed: Jan 05, 2017)	Polymorphism	Y
DNAI1	NM_012144.3(DNAI1):c.179C>T (p.Ala60Val)	VAR_033876	163163	Primary ciliary dyskinesia|not specified	Benign/Likely benign(Last reviewed: Jun 14, 2016)	Polymorphism	Y
DNAI2	NM_023036.4(DNAI2):c.1672G>A (p.Ala558Thr)	VAR_033880	163171	Primary ciliary dyskinesia|not specified	Benign(Last reviewed: Jun 14, 2016)	Polymorphism	Y
DNAI2	NM_023036.4(DNAI2):c.1483G>A (p.Val495Ile)	VAR_061140	226610	Primary ciliary dyskinesia|not specified	Benign(Last reviewed: Jun 14, 2016)	Polymorphism	Y
DNM2	NM_001005360.2(DNM2):c.1393C>T (p.Arg465Trp)	VAR_031965	7281	Myopathy, centronuclear|Myopathy, centronuclear, 1|not provided	Pathogenic(Last reviewed: Jun 21, 2017)	Disease	Y
DNM2	NM_001005360.2(DNM2):c.1102G>A (p.Glu368Lys)	VAR_031962	7282	Myopathy, centronuclear|Myopathy, centronuclear, 1	Pathogenic(Last reviewed: May 12, 2016)	Disease	Y
DNM2	NM_001190716.1(DNM2):c.1072G>A (p.Gly358Arg)	VAR_068425	7287	Charcot-Marie-Tooth disease, type 2M|DNM2-related intermediate Charcot-Marie-Tooth neuropathy|not provided	Pathogenic/Likely pathogenic(Last reviewed: Jan 11, 2017)	Disease	Y
DNM2	NM_001005360.2(DNM2):c.1565G>A (p.Arg522His)	VAR_068367	158514	Myopathy, centronuclear|not provided	Pathogenic(Last reviewed: Oct 10, 2016)	Disease	Y
DNM2	NM_001005360.2(DNM2):c.1880C>G (p.Pro627Arg)	VAR_068373	158520	Myopathy, centronuclear|not provided	Pathogenic/Likely pathogenic(Last reviewed: Aug 17, 2016)	Disease	Y
DNM2	NM_001005360.2(DNM2):c.788C>T (p.Pro263Leu)	VAR_031961	133979	Centronuclear Myopathy, Dominant|Charcot-Marie-Tooth, Intermediate|not specified	Benign/Likely benign(Last reviewed: Nov 18, 2016)	Polymorphism	Y
DNMT1	NM_001130823.2(DNMT1):c.290A>G (p.His97Arg)	VAR_024605	257539	Dementia, Deafness, and Sensory Neuropathy|not specified	Benign(Last reviewed: Jun 14, 2016)	Polymorphism	Y
DOCK8	NM_203447.3(DOCK8):c.1238A>G (p.Asn413Ser)	VAR_033890	163174	Hyper-IgE syndrome|not specified	Benign(Last reviewed: Jun 14, 2016)	Polymorphism	Y
DOCK8	NM_203447.3(DOCK8):c.709G>A (p.Glu237Lys)	VAR_033889	163173	Hyper-IgE syndrome|not specified	Benign/Likely benign(Last reviewed: Jun 14, 2016)	Polymorphism	Y
DOCK8	NM_203447.3(DOCK8):c.1790C>T (p.Ala597Val)	VAR_033891	137136	Hyper-IgE syndrome|not specified	Benign/Likely benign(Last reviewed: Jun 14, 2016)	Polymorphism	Y
DOCK8	NM_203447.3(DOCK8):c.5908G>C (p.Ala1970Pro)	VAR_033893	137154	Hyper-IgE syndrome|not specified	Benign/Likely benign(Last reviewed: Jun 14, 2016)	Polymorphism	Y
DOCK8	NM_203447.3(DOCK8):c.289C>A (p.Pro97Thr)	VAR_033888	178766	Hyper-IgE syndrome|Hyperimmunoglobulin E recurrent infection syndrome, autosomal recessive|not specified	Benign(Last reviewed: Jun 14, 2016)	Polymorphism	Y
DOK7	NM_173660.4(DOK7):c.1243C>T (p.Pro415Ser)	VAR_027548	128908	not specified	Benign(Last reviewed: Jul 08, 2016)	Polymorphism	Y
DOK7	NM_173660.4(DOK7):c.1351C>T (p.Arg451Trp)	VAR_027550	128910	not specified	Benign/Likely benign(Last reviewed: Dec 16, 2014)	Polymorphism	Y
DOK7	NM_173660.4(DOK7):c.887A>G (p.Gln296Arg)	VAR_027547	128916	not specified	Benign(Last reviewed: Feb 19, 2016)	Polymorphism	Y
DOK7	NM_173660.4(DOK7):c.1382G>A (p.Gly461Asp)	VAR_027551	128911	not specified	Benign(Last reviewed: Apr 28, 2016)	Polymorphism	Y
DPAGT1;HMBS	NM_001382.3(DPAGT1):c.1177A>G (p.Ile393Val)	VAR_011391	93728	Acute intermittent porphyria|Congenital disorder of glycosylation|not specified	Benign(Last reviewed: Jun 14, 2016)	Polymorphism	Y
DPM2	NM_003863.3(DPM2):c.227C>G (p.Thr76Ser)	VAR_033895	128921	Congenital disorder of glycosylation|not specified	Benign(Last reviewed: Jun 14, 2016)	Polymorphism	Y
DPYD	NM_000110.3(DPYD):c.1627A>G (p.Ile543Val)	VAR_005176	100092	Dihydropyrimidine dehydrogenase deficiency|not provided|not specified	Benign/Likely benign(Last reviewed: Jun 14, 2016)	Polymorphism	Y
DPYD	NM_000110.3(DPYD):c.2194G>A (p.Val732Ile)	VAR_014760	100080	Dihydropyrimidine dehydrogenase deficiency|not provided|not specified	Benign/Likely benign(Last reviewed: Aug 17, 2016)	Polymorphism	Y
DRC1	NM_145038.4(DRC1):c.2200G>A (p.Val734Met)	VAR_057758	402799	Primary ciliary dyskinesia|not specified	Benign(Last reviewed: Jan 24, 2017)	Polymorphism	Y
DRD2	NM_000795.3(DRD2):c.932C>G (p.Ser311Cys)	VAR_003462	256813	not specified	Benign(Last reviewed: Feb 29, 2016)	Polymorphism	Y
DSC2	NM_024422.4(DSC2):c.2326A>G (p.Ile776Val)	VAR_024388	46178	Cardiomyopathy, ARVC|Cardiovascular phenotype|not specified	Benign/Likely benign(Last reviewed: Jun 14, 2016)	Polymorphism	Y
DSC2	NM_024422.4(DSC2):c.2393G>A (p.Arg798Gln)	VAR_062392	36006	Arrhythmogenic right ventricular cardiomyopathy|Arrhythmogenic right ventricular cardiomyopathy, type 11|Cardiomyopathy, ARVC|Cardiovascular phenotype|not specified	Benign/Likely benign(Last reviewed: Jan 26, 2017)	Polymorphism	Y
DSC2	NM_024422.4(DSC2):c.32A>G (p.Asn11Ser)	VAR_029480	46191	Arrhythmogenic right ventricular cardiomyopathy, type 11|Cardiomyopathy, ARVC|Cardiovascular phenotype|not specified	Benign/Likely benign(Last reviewed: Jan 21, 2017)	Polymorphism	Y
DSG2	NM_001943.4(DSG2):c.146G>A (p.Arg49His)	VAR_029366	16810	Arrhythmogenic right ventricular cardiomyopathy|Arrhythmogenic right ventricular cardiomyopathy, type 10|not provided	Pathogenic/Likely pathogenic(Last reviewed: Jun 09, 2017)	Disease	Y
DSG2	NM_001943.4(DSG2):c.137G>A (p.Arg46Gln)	VAR_029365	16812	Arrhythmogenic right ventricular cardiomyopathy|Arrhythmogenic right ventricular cardiomyopathy, type 10|not provided	Pathogenic/Likely pathogenic(Last reviewed: Nov 23, 2016)	Disease	Y
DSG2	NM_001943.4(DSG2):c.2587A>C (p.Met863Leu)	VAR_048512	44304	Arrhythmogenic right ventricular cardiomyopathy, type 10|Cardiomyopathy, ARVC|Dilated Cardiomyopathy, Dominant|not specified	Benign/Likely benign(Last reviewed: Jan 18, 2017)	Polymorphism	Y
DSG2	NM_001943.4(DSG2):c.473T>G (p.Val158Gly)	VAR_062388	44319	Arrhythmogenic right ventricular cardiomyopathy|Arrhythmogenic right ventricular cardiomyopathy, type 10|Arrhythmogenic right ventricular dysplasia, familial 1|Cardiovascular phenotype|not specified	Benign/Likely benign(Last reviewed: Jan 10, 2017)	Polymorphism	Y
DSG2	NM_001943.4(DSG2):c.266A>G (p.Tyr89Cys)	VAR_048508	44306	Arrhythmogenic right ventricular cardiomyopathy, type 10|not specified	Benign(Last reviewed: Jan 18, 2017)	Polymorphism	Y
DSG2	NM_001943.4(DSG2):c.877A>G (p.Ile293Val)	VAR_048509	44331	Cardiomyopathy, ARVC|Cardiovascular phenotype|Dilated Cardiomyopathy, Dominant|not specified	Benign/Likely benign(Last reviewed: Jun 14, 2016)	Polymorphism	Y
DSG2	NM_001943.4(DSG2):c.1543G>A (p.Val515Ile)	VAR_048510	36010	Arrhythmogenic right ventricular cardiomyopathy|Arrhythmogenic right ventricular cardiomyopathy, type 10|Cardiomyopathy|Cardiomyopathy, ARVC|Dilated Cardiomyopathy, Dominant|not specified	Benign/Likely benign(Last reviewed: Dec 19, 2016)	Polymorphism	Y
DSG2	NM_001943.4(DSG2):c.2318G>A (p.Arg773Lys)	VAR_048511	44300	Cardiomyopathy, ARVC|Cardiovascular phenotype|Dilated Cardiomyopathy, Dominant|not specified	Benign/Likely benign(Last reviewed: Jun 14, 2016)	Polymorphism	Y
DSG2	NM_001943.4(DSG2):c.2708C>T (p.Thr903Ile)	VAR_048513	36012	Arrhythmogenic right ventricular cardiomyopathy, type 10|Cardiomyopathy|not specified	Benign(Last reviewed: Jan 05, 2017)	Polymorphism	Y
DSG2	NM_001943.4(DSG2):c.2137G>A (p.Glu713Lys)	VAR_062389	44295	Arrhythmogenic right ventricular cardiomyopathy|Cardiomyopathy, ARVC|Cardiovascular phenotype|not specified	Benign/Likely benign(Last reviewed: Jun 14, 2016)	Polymorphism	Y
DSP	NM_004415.3(DSP):c.4535A>G (p.Tyr1512Cys)	VAR_020468	44915	Cardiomyopathy, ARVC|Cardiovascular phenotype|Ectodermal dysplasia skin fragility syndrome|Epidermolysis bullosa, lethal acantholytic|Skin fragility woolly hair syndrome|not specified	Benign(Last reviewed: Jun 14, 2016)	Polymorphism	Y
DSP	NM_004415.3(DSP):c.4578C>A (p.Asn1526Lys)	VAR_065695	44919	Arrhythmogenic right ventricular cardiomyopathy, type 8|Cardiomyopathy dilated with woolly hair and keratoderma|Cardiomyopathy, ARVC|Cardiovascular phenotype|Ectodermal dysplasia skin fragility syndrome|Epidermolysis bullosa, lethal acantholytic|Skin fragility woolly hair syndrome|not specified	Benign(Last reviewed: Jan 30, 2017)	Polymorphism	Y
DSP	NM_004415.3(DSP):c.4609C>T (p.Arg1537Cys)	VAR_065696	44917	Arrhythmogenic right ventricular cardiomyopathy, type 8|Cardiomyopathy dilated with woolly hair and keratoderma|Cardiomyopathy, ARVC|Ectodermal dysplasia skin fragility syndrome|Epidermolysis bullosa, lethal acantholytic|Skin fragility woolly hair syndrome|not provided|not specified	Benign/Likely benign(Last reviewed: Jan 21, 2017)	Polymorphism	Y
DSP	NM_004415.3(DSP):c.5213G>A (p.Arg1738Gln)	VAR_023815	44925	Cardiomyopathy, ARVC|Ectodermal dysplasia skin fragility syndrome|Epidermolysis bullosa, lethal acantholytic|Skin fragility woolly hair syndrome|not provided|not specified	Benign(Last reviewed: Jul 22, 2016)	Polymorphism	Y
DSP	NM_004415.3(DSP):c.5324G>T (p.Arg1775Ile)	VAR_023816	161227	Arrhythmogenic right ventricular cardiomyopathy|Arrhythmogenic right ventricular cardiomyopathy, type 8|Cardiomyopathy dilated with woolly hair and keratoderma|not specified	Uncertain significance(Last reviewed: Oct 01, 2016)	Unclassified	Y
DSPP	NM_014208.3(DSPP):c.727G>A (p.Asp243Asn)	VAR_047551	197292	not specified	Benign(Last reviewed: Jan 27, 2015)	Polymorphism	Y
DTNBP1	NM_032122.4(DTNBP1):c.814C>T (p.Pro272Ser)	VAR_029644	163299	Hermansky-Pudlak syndrome|not specified	Benign/Likely benign(Last reviewed: Jun 14, 2016)	Polymorphism	Y
DUOX2	NM_014080.4(DUOX2):c.413C>T (p.Pro138Leu)	VAR_025324	260326	Congenital hypothyroidism|not specified	Benign(Last reviewed: Jun 14, 2016)	Polymorphism	Y
DUOX2	NM_014080.4(DUOX2):c.3200C>T (p.Ser1067Leu)	VAR_047075	260323	Congenital hypothyroidism|not specified	Benign(Last reviewed: Jun 14, 2016)	Polymorphism	Y
DUOX2	NM_014080.4(DUOX2):c.2033A>G (p.His678Arg)	VAR_061177	260317	Congenital hypothyroidism|not specified	Benign/Likely benign(Last reviewed: Jun 14, 2016)	Polymorphism	Y
DYNC1H1	NM_001376.4(DYNC1H1):c.1792C>T (p.Arg598Cys)	VAR_073157	139652	Hereditary motor and sensory neuropathy|Spinal muscular atrophy, lower extremity predominant 1, autosomal dominant|not provided	Pathogenic/Likely pathogenic(Last reviewed: Jun 21, 2017)	Disease	Y
DYNC1H1	NM_001376.4(DYNC1H1):c.1792C>T (p.Arg598Cys)	VAR_073157	139652	Hereditary motor and sensory neuropathy|Spinal muscular atrophy, lower extremity predominant 1, autosomal dominant|not provided	Pathogenic/Likely pathogenic(Last reviewed: Jun 21, 2017)	Disease	Y
DYNC1H1	NM_001376.4(DYNC1H1):c.4700G>A (p.Arg1567Gln)	VAR_070582	208709	Inborn genetic diseases|not provided	Pathogenic(Last reviewed: Apr 18, 2016)	Disease	Y
DYNC1H1	NM_001376.4(DYNC1H1):c.12087C>A (p.His4029Gln)	VAR_020890	128928	Charcot-Marie-Tooth, Type 2|Intellectual Disability, Dominant|Spinocerebellar Ataxia, Dominant|not specified	Benign/Likely benign(Last reviewed: Jun 14, 2016)	Polymorphism	Y
DYNC2H1	NM_001080463.1(DYNC2H1):c.3682C>A (p.Leu1228Ile)	VAR_069596	238270	Jeune thoracic dystrophy|not specified	Uncertain significance(Last reviewed: May 20, 2016)	Disease	N
DYNC2H1	NM_001080463.1(DYNC2H1):c.911A>T (p.Gln304Leu)	VAR_038863	302005	Jeune thoracic dystrophy|Short Rib Polydactyly Syndrome|not specified	Benign/Likely benign(Last reviewed: Dec 05, 2016)	Polymorphism	Y
DYNC2H1	NM_001080463.1(DYNC2H1):c.1367G>A (p.Arg456Gln)	VAR_038865	302013	Jeune thoracic dystrophy|Short Rib Polydactyly Syndrome|not specified	Benign/Likely benign(Last reviewed: Nov 08, 2016)	Polymorphism	Y
DYNC2H1	NM_001080463.1(DYNC2H1):c.1021C>T (p.His341Tyr)	VAR_038864	302008	Jeune thoracic dystrophy|Short Rib Polydactyly Syndrome|not specified	Benign/Likely benign(Last reviewed: Jun 14, 2016)	Polymorphism	Y
DYNC2H1	NM_001080463.1(DYNC2H1):c.3862A>G (p.Thr1288Ala)	VAR_038868	302031	Jeune thoracic dystrophy|Short Rib Polydactyly Syndrome|not specified	Benign/Likely benign(Last reviewed: Jun 14, 2016)	Polymorphism	Y
DYNC2H1	NM_001080463.1(DYNC2H1):c.8612G>A (p.Arg2871Gln)	VAR_038870	302073	Jeune thoracic dystrophy|Short Rib Polydactyly Syndrome|not specified	Benign(Last reviewed: Jun 14, 2016)	Polymorphism	Y
DYNC2H1	NM_001080463.1(DYNC2H1):c.4238A>G (p.Lys1413Arg)	VAR_038869	196009	Jeune thoracic dystrophy|Short Rib Polydactyly Syndrome|not specified	Benign(Last reviewed: Jun 14, 2016)	Polymorphism	Y
DYRK1A	NM_001396.3(DYRK1A):c.2035G>C (p.Ala679Pro)	VAR_040453	210893	not provided|not specified	Benign/Likely benign(Last reviewed: May 19, 2016)	Polymorphism	Y
DYSF	NM_003494.3(DYSF):c.3624C>G (p.Ile1208Met)	VAR_024865	285123	not specified	Uncertain significance(Last reviewed: Mar 20, 2017)	Disease	N
DYSF	NM_003494.3(DYSF):c.509C>A (p.Ala170Glu)	VAR_024853	94334	not specified	Benign/Likely benign(Last reviewed: Oct 14, 2016)	Disease	N
DYSF	NM_003494.3(DYSF):c.509C>A (p.Ala170Glu)	VAR_024853	94334	not specified	Benign/Likely benign(Last reviewed: Oct 14, 2016)	Disease	N
DYSF	NM_003494.3(DYSF):c.6124C>T (p.Arg2042Cys)	VAR_012311	6668	Limb-girdle muscular dystrophy, type 2B|Miyoshi muscular dystrophy 1|not provided	Pathogenic(Last reviewed: Apr 07, 2017)	Disease	Y
DYSF	NM_003494.3(DYSF):c.6124C>T (p.Arg2042Cys)	VAR_012311	6668	Limb-girdle muscular dystrophy, type 2B|Miyoshi muscular dystrophy 1|not provided	Pathogenic(Last reviewed: Apr 07, 2017)	Disease	Y
DYSF	NM_003494.3(DYSF):c.1852G>C (p.Gly618Arg)	VAR_057851	195490	Limb-girdle muscular dystrophy, type 2B	Pathogenic/Likely pathogenic(Last reviewed: Jun 02, 2016)	Disease	Y
DYSF	NM_003494.3(DYSF):c.1852G>C (p.Gly618Arg)	VAR_057851	195490	Limb-girdle muscular dystrophy, type 2B	Pathogenic/Likely pathogenic(Last reviewed: Jun 02, 2016)	Disease	Y
DYSF	NM_003494.3(DYSF):c.1663C>T (p.Arg555Trp)	VAR_024859	94278	DYSF-Related Disorders|Limb-girdle muscular dystrophy, type 2B|Miyoshi muscular dystrophy 1|not provided	Pathogenic(Last reviewed: Jun 14, 2016)	Disease	Y
DYSF	NM_003494.3(DYSF):c.1663C>T (p.Arg555Trp)	VAR_024859	94278	DYSF-Related Disorders|Limb-girdle muscular dystrophy, type 2B|Miyoshi muscular dystrophy 1|not provided	Pathogenic(Last reviewed: Jun 14, 2016)	Disease	Y
DYSF	NM_003494.3(DYSF):c.5077C>T (p.Arg1693Trp)	VAR_057871	217227	Limb-girdle muscular dystrophy, type 2B|Miyoshi muscular dystrophy 1	Pathogenic/Likely pathogenic(Last reviewed: Sep 15, 2015)	Disease	Y
DYSF	NM_003494.3(DYSF):c.4742G>A (p.Arg1581His)	VAR_057867	94329	Limb-Girdle Muscular Dystrophy, Recessive|Miyoshi myopathy|not specified	Uncertain significance(Last reviewed: Jul 07, 2016)	Polymorphism	N
DYSF	NM_003494.3(DYSF):c.565C>G (p.Leu189Val)	VAR_024854	94343	Limb-Girdle Muscular Dystrophy, Recessive|Miyoshi myopathy|not specified	Benign/Likely benign(Last reviewed: Jun 14, 2016)	Polymorphism	Y
DYSF	NM_003494.3(DYSF):c.2500A>G (p.Ile834Val)	VAR_049055	94289	Limb-Girdle Muscular Dystrophy, Recessive|Miyoshi myopathy|not specified	Benign/Likely benign(Last reviewed: Jun 14, 2016)	Polymorphism	Y
DYSF	NM_003494.3(DYSF):c.3287G>A (p.Arg1096His)	VAR_061170	128947	not specified	Benign/Likely benign(Last reviewed: Sep 22, 2016)	Polymorphism	Y
DYSF	NM_003494.3(DYSF):c.3992G>T (p.Arg1331Leu)	VAR_024867	94315	not specified	Benign/Likely benign(Last reviewed: Feb 08, 2016)	Polymorphism	Y
DYSF	NM_003494.3(DYSF):c.1120G>C (p.Val374Leu)	VAR_057844	94264	not provided|not specified	Benign(Last reviewed: May 08, 2017)	Unclassified	N
DYSF	NM_003494.3(DYSF):c.3113G>A (p.Arg1038Gln)	VAR_024862	242418	Limb-girdle muscular dystrophy, type 2B|not provided	Pathogenic(Last reviewed: Aug 18, 2016)	Unclassified	N
DYSF	NM_003494.3(DYSF):c.3065G>A (p.Arg1022Gln)	VAR_024861	94300	not specified	Benign/Likely benign(Last reviewed: Jan 18, 2016)	Unclassified	N
EARS2	NM_001083614.1(EARS2):c.322C>T (p.Arg108Trp)	VAR_069239	39787	Combined oxidative phosphorylation deficiency 12|not provided	Pathogenic/Likely pathogenic(Last reviewed: May 22, 2017)	Disease	Y
EARS2	NM_001083614.1(EARS2):c.1369A>G (p.Ser457Gly)	VAR_028840	137186	Combined oxidative phosphorylation deficiency|not specified	Benign(Last reviewed: Jun 14, 2016)	Polymorphism	Y
ECEL1	NM_004826.3(ECEL1):c.1210C>T (p.Arg404Cys)	VAR_069993	191152	Arthrogryposis, distal, type 5d|not provided	Pathogenic/Likely pathogenic(Last reviewed: Jun 01, 2016)	Disease	Y
ECEL1	NM_004826.3(ECEL1):c.982C>T (p.His328Tyr)	VAR_012814	128957	not specified	Benign(Last reviewed: Aug 15, 2013)	Polymorphism	Y
EDA	NM_001399.4(EDA):c.463C>T (p.Arg155Cys)	VAR_005182	11035	Hypohidrotic X-linked ectodermal dysplasia|Hypohidrotic ectodermal dysplasia|not provided	Pathogenic(Last reviewed: Nov 17, 2016)	Disease	Y
EDA	NM_001399.4(EDA):c.467G>A (p.Arg156His)	VAR_005184	11037	Hypohidrotic X-linked ectodermal dysplasia|Hypohidrotic ectodermal dysplasia|not provided	Pathogenic(Last reviewed: Sep 30, 2016)	Disease	Y
EDA	NM_001399.4(EDA):c.457C>T (p.Arg153Cys)	VAR_054454	44193	Hypohidrotic ectodermal dysplasia|not provided	Pathogenic(Last reviewed: Jun 08, 2016)	Disease	Y
EDA	NM_001399.4(EDA):c.871G>A (p.Gly291Arg)	VAR_010613	44211	Hypohidrotic ectodermal dysplasia|not provided	Pathogenic(Last reviewed: Apr 04, 2016)	Disease	Y
EDAR	NM_022336.3(EDAR):c.1259G>A (p.Arg420Gln)	VAR_013450	5853	Autosomal dominant hypohidrotic ectodermal dysplasia|Ectodermal dysplasia 10a, hypohidrotic/hair/tooth type, autosomal dominant|not provided	Pathogenic/Likely pathogenic(Last reviewed: Jul 25, 2016)	Disease	Y
EDAR	NM_022336.3(EDAR):c.1259G>A (p.Arg420Gln)	VAR_013450	5853	Autosomal dominant hypohidrotic ectodermal dysplasia|Ectodermal dysplasia 10a, hypohidrotic/hair/tooth type, autosomal dominant|not provided	Pathogenic/Likely pathogenic(Last reviewed: Jul 25, 2016)	Disease	Y
EDAR	NM_022336.3(EDAR):c.1144G>A (p.Gly382Ser)	VAR_054449	194115	Autosomal recessive hypohidrotic ectodermal dysplasia syndrome|not provided	Pathogenic(Last reviewed: May 28, 2015)	Disease	Y
EDAR	NM_022336.3(EDAR):c.1109T>C (p.Val370Ala)	VAR_020011	5858	Hair morphology 1, hair thickness|Hypohidrotic Ectodermal Dysplasia, Dominant|not specified	Benign, association(Last reviewed: Aug 04, 2016)	Polymorphism	Y
EDARADD	NM_145861.2(EDARADD):c.308C>T (p.Ser103Phe)	VAR_054509	262601	not specified	Benign(Last reviewed: Jun 22, 2016)	Polymorphism	Y
EDARADD	NM_145861.2(EDARADD):c.27G>A (p.Met9Ile)	VAR_050963	262600	Hypohidrotic Ectodermal Dysplasia, Recessive|not specified	Benign(Last reviewed: Jun 30, 2016)	Polymorphism	Y
EDN3	NM_207034.2(EDN3):c.670G>A (p.Ala224Thr)	VAR_009079	16647	Hirschsprung disease 4|not specified	Likely benign, risk factor(Last reviewed: Oct 07, 2015)	Disease	N
EDNRB	NM_000115.4(EDNRB):c.49C>T (p.Leu17Phe)	VAR_014676	226623	Hirschsprung Disease, Recessive|Waardenburg syndrome|not specified	Benign/Likely benign(Last reviewed: Jun 14, 2016)	Polymorphism	Y
EDNRB	NM_000115.4(EDNRB):c.731C>T (p.Thr244Met)	VAR_014678	255141	Hirschsprung Disease, Recessive|Waardenburg syndrome|not specified	Benign/Likely benign(Last reviewed: Jun 14, 2016)	Polymorphism	Y
EDNRB	NM_000115.4(EDNRB):c.914G>A (p.Ser305Asn)	VAR_003472	16638	Hirschsprung Disease, Recessive|Hirschsprung disease 2|not specified	Benign/Likely benign, risk factor(Last reviewed: Jun 14, 2016)	Polymorphism	Y
EFEMP2	NM_016938.4(EFEMP2):c.775A>G (p.Ile259Val)	VAR_027020	39015	Autosomal recessive cutis laxa type IA|Cutis laxa, recessive|not specified	Benign(Last reviewed: Sep 29, 2016)	Polymorphism	Y
EFHC1	NM_018100.3(EFHC1):c.1343T>C (p.Met448Thr)	VAR_043159	128962	Epilepsy juvenile absence|Juvenile myoclonic epilepsy|Juvenile myoclonic epilepsy|not specified	Benign/Likely benign(Last reviewed: Jan 18, 2017)	Polymorphism	Y
EFHC1	NM_018100.3(EFHC1):c.881G>A (p.Arg294His)	VAR_043156	128970	Epilepsy juvenile absence|Juvenile myoclonic epilepsy|not specified	Benign/Likely benign(Last reviewed: Dec 19, 2016)	Polymorphism	Y
EFHC1	NM_018100.3(EFHC1):c.1855A>C (p.Ile619Leu)	VAR_023626	128966	Juvenile myoclonic epilepsy|not specified	Benign/Likely benign(Last reviewed: Jun 14, 2016)	Polymorphism	Y
EFHC1	NM_018100.3(EFHC1):c.475C>T (p.Arg159Trp)	VAR_023620	128968	Juvenile myoclonic epilepsy|not specified	Benign/Likely benign(Last reviewed: Jun 14, 2016)	Polymorphism	Y
EFHC1	NM_018100.3(EFHC1):c.1069G>A (p.Glu357Lys)	VAR_048666	137195	Epilepsy juvenile absence|Juvenile myoclonic epilepsy|not provided|not specified	Benign/Likely benign(Last reviewed: Feb 27, 2017)	Polymorphism	Y
EGFR	NM_005228.4(EGFR):c.1562G>A (p.Arg521Lys)	VAR_019295	134021	Lung cancer|not specified	Benign/Likely benign(Last reviewed: Jun 14, 2016)	Polymorphism	Y
EGLN1	NM_022051.2(EGLN1):c.12C>G (p.Asp4Glu)	VAR_071858	156155	Erythrocytosis, familial, 3|Familial erythrocytosis	Benign/Likely benign(Last reviewed: Jun 14, 2016)	Polymorphism	Y
EGR2	NM_000399.4(EGR2):c.1075C>T (p.Arg359Trp)	VAR_009874	16752	Charcot-Marie-Tooth disease, demyelinating, type 1d|Charcot-Marie-Tooth disease, type I|Dejerine-Sottas disease|Dejerine-sottas neuropathy, autosomal dominant|not provided	Pathogenic(Last reviewed: May 09, 2017)	Disease	Y
EGR2	NM_000399.4(EGR2):c.1075C>T (p.Arg359Trp)	VAR_009874	16752	Charcot-Marie-Tooth disease, demyelinating, type 1d|Charcot-Marie-Tooth disease, type I|Dejerine-Sottas disease|Dejerine-sottas neuropathy, autosomal dominant|not provided	Pathogenic(Last reviewed: May 09, 2017)	Disease	Y
EIF2AK3	NM_004836.6(EIF2AK3):c.1697A>T (p.Asp566Val)	VAR_040477	337412	Wolcott-Rallison dysplasia|not provided	Uncertain significance(Last reviewed: Aug 31, 2016)	Polymorphism	N
EIF2AK3	NM_004836.6(EIF2AK3):c.497A>G (p.Gln166Arg)	VAR_011410	128988	Wolcott-Rallison dysplasia|not specified	Benign/Likely benign(Last reviewed: Jun 14, 2016)	Polymorphism	Y
EIF2AK4	NM_001013703.3(EIF2AK4):c.1321A>C (p.Ile441Leu)	VAR_040481	381213	not specified	Benign(Last reviewed: Jan 13, 2017)	Polymorphism	Y
EIF2AK4	NM_001013703.3(EIF2AK4):c.3916G>T (p.Gly1306Cys)	VAR_040485	381182	not specified	Benign(Last reviewed: Dec 27, 2016)	Polymorphism	Y
EIF2B2	NM_014239.3(EIF2B2):c.599G>T (p.Gly200Val)	VAR_068453	208575	Leukoencephalopathy with vanishing white matter|not provided	Pathogenic/Likely pathogenic(Last reviewed: Jan 30, 2017)	Disease	Y
EIF2B5	NM_003907.2(EIF2B5):c.338G>A (p.Arg113His)	VAR_012292	5945	Leukoencephalopathy with vanishing white matter|Ovarioleukodystrophy|not provided	Pathogenic(Last reviewed: May 05, 2017)	Disease	Y
EIF2B5	NM_003907.2(EIF2B5):c.271A>G (p.Thr91Ala)	VAR_012291	5942	Leukoencephalopathy with vanishing white matter|not provided	Pathogenic(Last reviewed: Jun 14, 2016)	Disease	Y
EIF2B5	NM_003907.2(EIF2B5):c.1759A>G (p.Ile587Val)	VAR_012332	94381	Leukoencephalopathy with vanishing white matter|not specified	Benign/Likely benign(Last reviewed: Jun 14, 2016)	Polymorphism	Y
ELAC2	NM_018127.6(ELAC2):c.155C>T (p.Ser52Phe)	VAR_038210	241272	Combined oxidative phosphorylation deficiency 17|not specified	Likely benign(Last reviewed: Sep 07, 2016)	Polymorphism	Y
ELANE	NM_001972.3(ELANE):c.770C>T (p.Pro257Leu)	VAR_019238	258501	not provided|not specified	Benign/Likely benign(Last reviewed: May 05, 2017)	Polymorphism	Y
ELANE	NM_001972.3(ELANE):c.785C>T (p.Pro262Leu)	VAR_019239	137202	not specified	Benign/Likely benign(Last reviewed: Aug 27, 2016)	Polymorphism	Y
ELANE	NM_001972.3(ELANE):c.655G>A (p.Val219Ile)	VAR_019237	137201	not specified	Benign/Likely benign(Last reviewed: Feb 21, 2017)	Unclassified	N
ELANE	NM_001972.3(ELANE):c.655G>A (p.Val219Ile)	VAR_019237	137201	not specified	Benign/Likely benign(Last reviewed: Feb 21, 2017)	Unclassified	N
ELN	NM_000501.3(ELN):c.1264G>A (p.Gly422Ser)	VAR_020882	43582	Cutis laxa, autosomal dominant|Supravalvular aortic stenosis|not specified	Benign(Last reviewed: Jun 14, 2016)	Polymorphism	Y
ELOVL4	NM_022726.3(ELOVL4):c.800T>C (p.Ile267Thr)	VAR_017043	137204	Stargardt Disease, Dominant|not specified	Benign/Likely benign(Last reviewed: Jun 14, 2016)	Polymorphism	Y
ELOVL4	NM_022726.3(ELOVL4):c.895A>G (p.Met299Val)	VAR_012492	137206	Stargardt Disease, Dominant|not specified	Benign(Last reviewed: Jun 14, 2016)	Polymorphism	Y
ELP1	NM_003640.4(ELP1):c.208C>T (p.Arg70Cys)	VAR_047476	285240	Familial dysautonomia|not specified	Uncertain significance(Last reviewed: Jun 14, 2016)	Polymorphism	N
ELP1	NM_003640.4(ELP1):c.545T>A (p.Met182Lys)	VAR_047477	259114	Familial dysautonomia|not specified	Benign/Likely benign(Last reviewed: Dec 08, 2016)	Polymorphism	Y
ELP1	NM_003640.4(ELP1):c.3473C>T (p.Pro1158Leu)	VAR_047487	259113	Familial dysautonomia|not specified	Benign/Likely benign(Last reviewed: Jun 14, 2016)	Polymorphism	Y
ELP1	NM_003640.4(ELP1):c.2294G>A (p.Gly765Glu)	VAR_047480	137577	Familial dysautonomia|not specified	Benign/Likely benign(Last reviewed: Jun 14, 2016)	Polymorphism	Y
ELP1	NM_003640.4(ELP1):c.2446A>C (p.Ile816Leu)	VAR_047481	137578	Familial dysautonomia|not specified	Benign/Likely benign(Last reviewed: Jun 14, 2016)	Polymorphism	Y
ELP1	NM_003640.4(ELP1):c.2490A>G (p.Ile830Met)	VAR_047482	137579	Familial dysautonomia|not specified	Benign/Likely benign(Last reviewed: Jun 14, 2016)	Polymorphism	Y
ELP1	NM_003640.4(ELP1):c.3037G>A (p.Gly1013Ser)	VAR_047485	259110	Familial dysautonomia|not specified	Benign/Likely benign(Last reviewed: Dec 08, 2016)	Polymorphism	Y
ELP1	NM_003640.4(ELP1):c.2855A>T (p.Lys952Ile)	VAR_047484	259109	Familial dysautonomia|not specified	Benign(Last reviewed: Jan 24, 2017)	Polymorphism	Y
ELP1	NM_003640.4(ELP1):c.3214T>A (p.Cys1072Ser)	VAR_047486	259112	Familial dysautonomia|not specified	Benign/Likely benign(Last reviewed: Jun 14, 2016)	Polymorphism	Y
ELP1	NM_003640.4(ELP1):c.1574G>A (p.Arg525Gln)	VAR_047479	137574	Familial dysautonomia|not specified	Benign/Likely benign(Last reviewed: Jun 14, 2016)	Polymorphism	Y
ENAM	NM_031889.2(ENAM):c.2288G>A (p.Arg763Gln)	VAR_024313	261985	Amelogenesis Imperfecta, Dominant|not specified	Benign/Likely benign(Last reviewed: Jun 14, 2016)	Polymorphism	Y
ENAM	NM_031889.2(ENAM):c.1943T>C (p.Ile648Thr)	VAR_024312	261984	Amelogenesis Imperfecta, Dominant|not specified	Benign(Last reviewed: Jun 14, 2016)	Polymorphism	Y
ENG	NM_000118.3(ENG):c.1844C>T (p.Ser615Leu)	VAR_026783	161229	Haemorrhagic telangiectasia 1|Juvenile Polyposis|Osler hemorrhagic telangiectasia syndrome|not specified	Likely benign(Last reviewed: Jan 06, 2017)	Disease	N
ENG	NM_000118.3(ENG):c.1586G>A (p.Arg529His)	VAR_070299	213212	Osler hemorrhagic telangiectasia syndrome|not provided|not specified	Pathogenic/Likely pathogenic(Last reviewed: May 16, 2017)	Disease	Y
ENG	NM_000118.3(ENG):c.447G>C (p.Trp149Cys)	VAR_005195	237027	Osler hemorrhagic telangiectasia syndrome|not provided|not specified	Pathogenic(Last reviewed: Jan 06, 2017)	Disease	Y
ENG	NM_000118.3(ENG):c.1096G>C (p.Asp366His)	VAR_014764	163406	Juvenile Polyposis|Osler hemorrhagic telangiectasia syndrome|not specified	Benign/Likely benign(Last reviewed: Jan 19, 2017)	Polymorphism	Y
ENG	NM_000118.3(ENG):c.14C>T (p.Thr5Met)	VAR_005192	178774	Juvenile Polyposis|Osler hemorrhagic telangiectasia syndrome|not specified	Benign/Likely benign(Last reviewed: Jan 26, 2017)	Polymorphism	Y
ENO3	NM_053013.3(ENO3):c.212A>G (p.Asn71Ser)	VAR_020618	324136	Glycogen storage disease type 13|not provided|not specified	Benign(Last reviewed: Jun 14, 2016)	Polymorphism	Y
ENO3	NM_053013.3(ENO3):c.254T>C (p.Val85Ala)	VAR_020619	324138	Glycogen storage disease type 13|not provided|not specified	Benign(Last reviewed: Jun 14, 2016)	Polymorphism	Y
ENPP1	NM_006208.2(ENPP1):c.517A>C (p.Lys173Gln)	VAR_008873	13589	Arterial calcification of infancy|Diabetes mellitus type 2|Hypophosphatemic Rickets, Recessive|Insulin resistance, susceptibility to|Obesity|not specified	Benign, risk factor(Last reviewed: Aug 15, 2016)	Polymorphism	Y
ENPP1	NM_006208.2(ENPP1):c.2335A>C (p.Thr779Pro)	VAR_014144	284854	Arterial calcification of infancy|Hypophosphatemic Rickets, Recessive|not specified	Benign/Likely benign(Last reviewed: Jun 14, 2016)	Polymorphism	Y
EP300	NM_001429.3(EP300):c.6668A>C (p.Gln2223Pro)	VAR_038377	93744	Rubinstein-Taybi syndrome|not specified	Benign/Likely benign(Last reviewed: Jun 14, 2016)	Polymorphism	Y
EP300	NM_001429.3(EP300):c.2989A>G (p.Ile997Val)	VAR_020425	93736	Rubinstein-Taybi syndrome|not specified	Benign(Last reviewed: Jun 14, 2016)	Polymorphism	Y
EP300	NM_001429.3(EP300):c.865A>G (p.Met289Val)	VAR_055554	134046	Rubinstein-Taybi syndrome|not specified	Likely benign(Last reviewed: Jun 14, 2016)	Polymorphism	Y
EPCAM	NM_002354.2(EPCAM):c.344T>C (p.Met115Thr)	VAR_018329	183700	Hereditary cancer-predisposing syndrome|Lynch syndrome|Lynch syndrome I|not specified	Benign/Likely benign(Last reviewed: Aug 18, 2017)	Polymorphism	Y
EPHA2	NM_004431.4(EPHA2):c.2627G>A (p.Arg876His)	VAR_042125	259391	Age-related cortical cataract|not specified	Benign/Likely benign(Last reviewed: Jun 14, 2016)	Polymorphism	Y
EPM2A	NM_005670.3(EPM2A):c.136G>C (p.Ala46Pro)	VAR_019468	162617	Lafora disease|Progressive myoclonic epilepsy|not specified	Benign(Last reviewed: Jan 05, 2017)	Polymorphism	Y
ERCC2	NM_000400.3(ERCC2):c.1847G>C (p.Arg616Pro)	VAR_003626	329508	Cerebrooculofacioskeletal syndrome 2|Trichothiodystrophy 1, photosensitive|Xeroderma pigmentosum|not provided	Pathogenic/Likely pathogenic(Last reviewed: Apr 12, 2017)	Disease	Y
ERCC2	NM_000400.3(ERCC2):c.1847G>C (p.Arg616Pro)	VAR_003626	329508	Cerebrooculofacioskeletal syndrome 2|Trichothiodystrophy 1, photosensitive|Xeroderma pigmentosum|not provided	Pathogenic/Likely pathogenic(Last reviewed: Apr 12, 2017)	Disease	Y
ERCC2	NM_000400.3(ERCC2):c.2251A>C (p.Lys751Gln)	VAR_011416	134105	Non-small cell lung cancer|Osteosarcoma|Xeroderma pigmentosum|not specified	Benign(Last reviewed: Jun 14, 2016)	Polymorphism	Y
ERCC2	NM_000400.3(ERCC2):c.934G>A (p.Asp312Asn)	VAR_011414	134117	Xeroderma pigmentosum|not specified	Benign(Last reviewed: Jun 14, 2016)	Polymorphism	Y
ERCC4	NM_005236.2(ERCC4):c.2117T>C (p.Ile706Thr)	VAR_014771	134142	Cockayne syndrome|Fanconi anemia, complementation group Q|Xeroderma pigmentosum, group F|not specified	Uncertain significance(Last reviewed: Dec 05, 2016)	Polymorphism	N
ERCC4	NM_005236.2(ERCC4):c.1244G>A (p.Arg415Gln)	VAR_013396	134155	Xeroderma pigmentosum|not specified	Benign/Likely benign(Last reviewed: Jun 14, 2016)	Polymorphism	Y
ERCC4	NM_005236.2(ERCC4):c.2624A>G (p.Glu875Gly)	VAR_013408	129008	Cockayne syndrome|Fanconi anemia, complementation group Q|Hereditary cancer-predisposing syndrome|Xeroderma pigmentosum, group F|not provided|not specified	Benign/Likely benign(Last reviewed: Jan 15, 2017)	Polymorphism	Y
ERCC4	NM_005236.2(ERCC4):c.1984T>C (p.Ser662Pro)	VAR_014770	134134	Cockayne syndrome|Fanconi anemia, complementation group Q|Xeroderma pigmentosum|Xeroderma pigmentosum, group F|not specified	Benign/Likely benign(Last reviewed: Jan 19, 2017)	Polymorphism	Y
ERCC4	NM_005236.2(ERCC4):c.2617A>G (p.Ile873Val)	VAR_019201	134135	Cockayne syndrome|Fanconi anemia, complementation group Q|Xeroderma pigmentosum, group F|not provided|not specified	Benign/Likely benign(Last reviewed: Jun 19, 2017)	Polymorphism	Y
ERCC5	NM_000123.3(ERCC5):c.760A>G (p.Met254Val)	VAR_007732	129012	Xeroderma pigmentosum|not specified	Benign/Likely benign(Last reviewed: Jun 14, 2016)	Polymorphism	Y
ERCC5	NM_000123.3(ERCC5):c.3310G>C (p.Asp1104His)	VAR_007734	129011	Xeroderma pigmentosum|not specified	Benign/Likely benign(Last reviewed: Jun 14, 2016)	Polymorphism	Y
ERCC5	NM_000123.3(ERCC5):c.1586G>C (p.Cys529Ser)	VAR_020433	129010	Xeroderma pigmentosum|not specified	Benign/Likely benign(Last reviewed: Jun 14, 2016)	Polymorphism	Y
ERCC6	NM_000124.3(ERCC6):c.2825C>T (p.Thr942Met)	VAR_016303	255165	Cerebrooculofacioskeletal Syndrome|Cockayne syndrome|Macular degeneration|not specified	Benign(Last reviewed: Jun 14, 2016)	Polymorphism	Y
ERCC6	NM_000124.3(ERCC6):c.3289A>G (p.Met1097Val)	VAR_001223	129016	Cerebrooculofacioskeletal Syndrome|Cockayne syndrome|Macular degeneration|not specified	Benign/Likely benign(Last reviewed: Jun 14, 2016)	Polymorphism	Y
ERCC6	NM_000124.3(ERCC6):c.3637A>G (p.Arg1213Gly)	VAR_001224	129017	Cerebrooculofacioskeletal Syndrome|Cockayne syndrome|Macular degeneration|not specified	Benign/Likely benign(Last reviewed: Jun 14, 2016)	Polymorphism	Y
ERCC6	NM_000124.3(ERCC6):c.1196G>A (p.Gly399Asp)	VAR_001217	129013	Cerebrooculofacioskeletal Syndrome|Cockayne syndrome|Macular degeneration|not specified	Benign/Likely benign(Last reviewed: Jun 14, 2016)	Polymorphism	Y
ERCC6	NM_000124.3(ERCC6):c.4238A>G (p.Gln1413Arg)	VAR_001225	129020	Cerebrooculofacioskeletal Syndrome|Cockayne syndrome|Macular degeneration|not specified	Benign/Likely benign(Last reviewed: Jun 14, 2016)	Polymorphism	Y
ERCC6	NM_000124.3(ERCC6):c.3922G>C (p.Val1308Leu)	VAR_016306	300041	Cerebrooculofacioskeletal Syndrome|Cockayne syndrome|Macular degeneration|not provided	Likely benign(Last reviewed: May 30, 2017)	Polymorphism	Y
ERCC6	NM_000124.3(ERCC6):c.4065T>G (p.Asp1355Glu)	VAR_037437	255167	not specified	Benign/Likely benign(Last reviewed: Jul 28, 2015)	Polymorphism	Y
ERCC6	NM_000124.3(ERCC6):c.1337G>A (p.Gly446Asp)	VAR_016302	235642	Cerebrooculofacioskeletal Syndrome|Cockayne syndrome|Macular degeneration|not provided|not specified	Benign/Likely benign(Last reviewed: Jun 14, 2016)	Polymorphism	Y
ERCC6	NM_000124.3(ERCC6):c.3689G>C (p.Arg1230Pro)	VAR_016305	129018	Cerebrooculofacioskeletal Syndrome|Cockayne syndrome|Macular degeneration|not specified	Benign/Likely benign(Last reviewed: Jun 14, 2016)	Polymorphism	Y
ESCO2	NM_001017420.2(ESCO2):c.239C>T (p.Ala80Val)	VAR_033840	21240	Roberts-SC phocomelia syndrome|not specified	Benign/Likely benign(Last reviewed: Jun 14, 2016)	Polymorphism	Y
ESRRB	NM_004452.3(ESRRB):c.1156C>T (p.Pro386Ser)	VAR_043507	44995	Nonsyndromic Hearing Loss, Recessive|not specified	Benign/Likely benign(Last reviewed: Jan 05, 2017)	Polymorphism	Y
ETFA	NM_000126.3(ETFA):c.797C>T (p.Thr266Met)	VAR_002368	2594	Glutaric acidemia IIA|Glutaric aciduria, type 2|not provided	Pathogenic/Likely pathogenic(Last reviewed: Sep 15, 2016)	Disease	Y
ETFA	NM_000126.3(ETFA):c.512C>T (p.Thr171Ile)	VAR_008547	92443	Glutaric aciduria, type 2|not specified	Benign/Likely benign(Last reviewed: Jun 14, 2016)	Polymorphism	Y
ETFDH	NM_004453.3(ETFDH):c.1367C>T (p.Pro456Leu)	VAR_075455	95072	Glutaric aciduria, type 2|Glutaric aciduria, type 2|not provided	Pathogenic(Last reviewed: Oct 27, 2016)	Disease	Y
ETFDH	NM_004453.3(ETFDH):c.92C>T (p.Thr31Ile)	VAR_062966	95075	Glutaric aciduria, type 2|not specified	Benign(Last reviewed: Jun 14, 2016)	Polymorphism	Y
EVC	NM_153717.2(EVC):c.1727G>A (p.Arg576Gln)	VAR_009948	262768	Curry-Hall syndrome|Ellis-van Creveld Syndrome|not specified	Benign(Last reviewed: Jun 14, 2016)	Polymorphism	Y
EVC	NM_153717.2(EVC):c.341C>T (p.Ala114Val)	VAR_033852	262779	Curry-Hall syndrome|Ellis-van Creveld Syndrome|not specified	Benign(Last reviewed: Jun 14, 2016)	Polymorphism	Y
EVC	NM_153717.2(EVC):c.2279G>A (p.Arg760Gln)	VAR_009949	262771	Curry-Hall syndrome|Ellis-van Creveld Syndrome|not specified	Benign/Likely benign(Last reviewed: Aug 04, 2016)	Polymorphism	Y
EVC	NM_153717.2(EVC):c.221A>C (p.Gln74Pro)	VAR_009942	262770	Curry-Hall syndrome|Ellis-van Creveld Syndrome|not specified	Benign(Last reviewed: Jun 14, 2016)	Polymorphism	Y
EVC	NM_153717.2(EVC):c.1346C>A (p.Thr449Lys)	VAR_009947	167044	Curry-Hall syndrome|Ellis-van Creveld Syndrome|not specified	Benign(Last reviewed: Jun 14, 2016)	Polymorphism	Y
EVC	NM_153717.2(EVC):c.1115C>T (p.Thr372Met)	VAR_033853	262765	Curry-Hall syndrome|Ellis-van Creveld Syndrome|not specified	Benign(Last reviewed: Dec 12, 2016)	Polymorphism	Y
EVC	NM_153717.2(EVC):c.772T>C (p.Tyr258His)	VAR_009943	198282	Curry-Hall syndrome|Ellis-van Creveld Syndrome|not specified	Benign(Last reviewed: Jun 14, 2016)	Polymorphism	Y
EVC2	NM_147127.4(EVC2):c.688A>G (p.Ser230Gly)	VAR_051089	262620	Ellis-van Creveld Syndrome|not specified	Benign(Last reviewed: Jun 14, 2016)	Polymorphism	Y
EVC2	NM_147127.4(EVC2):c.2095A>G (p.Thr699Ala)	VAR_017210	262610	Ellis-van Creveld Syndrome|not specified	Benign(Last reviewed: Jun 14, 2016)	Polymorphism	Y
EXOSC3	NM_016042.3(EXOSC3):c.395A>C (p.Asp132Ala)	VAR_068506	31688	Inborn genetic diseases|Pontocerebellar hypoplasia, type 1b|not provided	Pathogenic/Likely pathogenic(Last reviewed: May 18, 2017)	Disease	Y
EXOSC3	NM_016042.3(EXOSC3):c.673T>C (p.Tyr225His)	VAR_054098	129026	Pontoneocerebellar hypoplasia|not specified	Benign/Likely benign(Last reviewed: Jun 14, 2016)	Polymorphism	Y
EXT2	NM_207122.1(EXT2):c.124A>G (p.Met42Val)	VAR_033921	134207	Hereditary Multiple Osteochondromatosis|not provided|not specified	Benign/Likely benign(Last reviewed: May 04, 2017)	Polymorphism	Y
EYA1	NM_172058.3(EYA1):c.58C>G (p.Pro20Ala)	VAR_024439	48108	Branchiootorenal Spectrum Disorders|Otofaciocervical syndrome 1|not specified	Benign(Last reviewed: Jun 14, 2016)	Polymorphism	Y
EYA4	NM_004100.4(EYA4):c.829G>A (p.Gly277Ser)	VAR_022932	44773	Cardiovascular phenotype|Dilated Cardiomyopathy, Dominant|Nonsyndromic Hearing Loss, Dominant|not specified	Benign/Likely benign(Last reviewed: Jun 14, 2016)	Polymorphism	Y
EYS	NM_001142800.1(EYS):c.2234A>G (p.Asn745Ser)	VAR_063448	194357	Retinitis Pigmentosa, Recessive|not specified	Uncertain significance(Last reviewed: Jun 14, 2016)	Disease	N
EYS	NM_198283.1(EYS):c.334G>A (p.Val112Ile)	VAR_063438	137260	not specified	Benign(Last reviewed: Jun 17, 2014)	Polymorphism	Y
EYS	NM_001142800.1(EYS):c.5977A>G (p.Thr1993Ala)	VAR_063475	93619	Retinitis Pigmentosa, Recessive|not specified	Benign/Likely benign(Last reviewed: Jun 14, 2016)	Polymorphism	Y
EYS	NM_001142800.1(EYS):c.359C>T (p.Thr120Met)	VAR_035301	137261	Retinitis Pigmentosa, Recessive|not specified	Benign/Likely benign(Last reviewed: Jun 14, 2016)	Polymorphism	Y
EYS	NM_001142800.1(EYS):c.5617C>G (p.Leu1873Val)	VAR_063471	93618	Retinitis Pigmentosa, Recessive|not specified	Benign/Likely benign(Last reviewed: Jun 14, 2016)	Polymorphism	Y
EYS	NM_001142800.1(EYS):c.1922A>T (p.Glu641Val)	VAR_063447	137268	Retinitis Pigmentosa, Recessive|not specified	Benign/Likely benign(Last reviewed: Jun 14, 2016)	Polymorphism	Y
EYS	NM_001142800.1(EYS):c.6119T>A (p.Val2040Asp)	VAR_063477	137257	not specified	Benign/Likely benign(Last reviewed: Jun 17, 2014)	Polymorphism	Y
EYS	NM_001142800.1(EYS):c.6977G>A (p.Arg2326Gln)	VAR_063482	93620	Retinitis Pigmentosa, Recessive|not specified	Benign/Likely benign(Last reviewed: Jun 14, 2016)	Polymorphism	Y
EYS	NM_001142800.1(EYS):c.5244A>C (p.Leu1748Phe)	VAR_063468	93616	Retinitis Pigmentosa, Recessive|not provided|not specified	Benign/Likely benign(Last reviewed: Jun 14, 2016)	Polymorphism	Y
EYS	NM_001142801.1(EYS):c.1712A>G (p.Gln571Arg)	VAR_063444	137265	Retinitis Pigmentosa, Recessive|not specified	Benign/Likely benign(Last reviewed: Jun 14, 2016)	Polymorphism	Y
EYS	NM_001142800.1(EYS):c.4549A>G (p.Ser1517Gly)	VAR_063462	93614	Retinitis Pigmentosa, Recessive|not provided|not specified	Benign/Likely benign(Last reviewed: Jun 14, 2016)	Polymorphism	Y
EYS	NM_001142800.1(EYS):c.4543C>T (p.Arg1515Trp)	VAR_063461	93613	Retinitis Pigmentosa, Recessive|not specified	Benign/Likely benign(Last reviewed: Jun 14, 2016)	Polymorphism	Y
EYS	NM_001142800.1(EYS):c.4352T>C (p.Ile1451Thr)	VAR_063460	93612	Retinitis Pigmentosa, Recessive|not specified	Benign/Likely benign(Last reviewed: Jun 14, 2016)	Polymorphism	Y
EYS	NM_001142800.1(EYS):c.2555T>C (p.Leu852Pro)	VAR_043561	93605	Retinitis Pigmentosa, Recessive|not provided|not specified	Benign(Last reviewed: Jun 14, 2016)	Polymorphism	Y
EYS	NM_001142800.1(EYS):c.5705A>T (p.Asn1902Ile)	VAR_063472	137256	Retinitis Pigmentosa, Recessive|not specified	Benign/Likely benign(Last reviewed: Jun 14, 2016)	Polymorphism	Y
EZH2	NM_004456.4(EZH2):c.553G>C (p.Asp185His)	VAR_055795	134224	Weaver syndrome|not specified	Benign(Last reviewed: Jun 14, 2016)	Polymorphism	Y
F10;F7	NM_000131.4(F7):c.1238G>A (p.Arg413Gln)	VAR_006518	12080	Factor VII deficiency|Factor X deficiency|Myocardial infarction, decreased susceptibility to|not specified	Benign, risk factor(Last reviewed: Jun 14, 2016)	Polymorphism	Y
F12	NM_000505.3(F12):c.983C>A (p.Thr328Lys)	VAR_031501	1169	Hereditary angioneurotic edema|Hereditary angioneurotic edema with normal C1 esterase inhibitor activity|not provided	Pathogenic(Last reviewed: Mar 31, 2017)	Disease	Y
F12	NM_000505.3(F12):c.619G>C (p.Ala207Pro)	VAR_014336	256310	Hereditary Angioedema|Reduced factor XII activity|not specified	Benign(Last reviewed: Jun 14, 2016)	Polymorphism	Y
F13A1	NM_000129.3(F13A1):c.1694C>T (p.Pro565Leu)	VAR_007471	255183	Factor xiii, a subunit, deficiency of|not specified	Benign/Likely benign(Last reviewed: Jun 14, 2016)	Polymorphism	Y
F13A1	NM_000129.3(F13A1):c.103G>T (p.Val35Leu)	VAR_013927	16532	Factor xiii, a subunit, deficiency of|Myocardial infarction, protection against|Venous thrombosis, protection against|not specified	Benign/Likely benign, protective(Last reviewed: Jun 14, 2016)	Polymorphism	Y
F13A1	NM_000129.3(F13A1):c.1951G>A (p.Val651Ile)	VAR_007472	255185	Factor xiii, a subunit, deficiency of|not specified	Benign/Likely benign(Last reviewed: Jun 14, 2016)	Polymorphism	Y
F13B	NM_001994.2(F13B):c.344G>A (p.Arg115His)	VAR_013931	16520	Factor xiii, b subunit, deficiency of|Venous thrombosis, susceptibility to|not specified	Benign, risk factor(Last reviewed: Jun 14, 2016)	Polymorphism	Y
F2	NM_000506.4(F2):c.494C>T (p.Thr165Met)	VAR_011781	256317	Hereditary factor II deficiency disease|Thrombophilia|not specified	Benign/Likely benign(Last reviewed: Jun 14, 2016)	Polymorphism	Y
F5	NM_000130.4(F5):c.1601G>A (p.Arg534Gln)	VAR_001213	642	Budd-Chiari syndrome, susceptibility to|Factor V deficiency|Ischemic stroke, susceptibility to|Recurrent abortion|Thrombophilia due to activated protein C resistance|Thrombophilia due to factor V Leiden	Pathogenic, risk factor(Last reviewed: Jul 14, 2017)	Polymorphism	N
F5	NM_000130.4(F5):c.3853C>A (p.Leu1285Ile)	VAR_013892	255205	Budd-Chiari syndrome|Factor V deficiency|Thrombophilia|Thrombophilia due to activated protein C resistance|not specified	Benign/Likely benign(Last reviewed: Jun 14, 2016)	Polymorphism	Y
F5	NM_000130.4(F5):c.3980A>G (p.His1327Arg)	VAR_013893	37345	Thrombophilia due to activated protein C resistance|not specified	Benign/Likely benign(Last reviewed: Jun 14, 2016)	Polymorphism	Y
F5	NM_000130.4(F5):c.2573A>G (p.Lys858Arg)	VAR_001214	255200	Thrombophilia due to activated protein C resistance|not specified	Benign/Likely benign(Last reviewed: Jun 14, 2016)	Polymorphism	Y
F5	NM_000130.4(F5):c.2594A>G (p.His865Arg)	VAR_001215	255201	Budd-Chiari syndrome|Factor V deficiency|Thrombophilia|Thrombophilia due to activated protein C resistance|not specified	Benign/Likely benign(Last reviewed: Jun 14, 2016)	Polymorphism	Y
F5	NM_000130.4(F5):c.2450A>C (p.Asn817Thr)	VAR_013889	255199	Budd-Chiari syndrome|Factor V deficiency|Thrombophilia|Thrombophilia due to activated protein C resistance|not specified	Benign/Likely benign(Last reviewed: Jun 14, 2016)	Polymorphism	Y
F5	NM_000130.4(F5):c.319G>C (p.Asp107His)	VAR_013886	255203	Budd-Chiari syndrome|Factor V deficiency|Thrombophilia|Thrombophilia due to activated protein C resistance|not specified	Benign/Likely benign(Last reviewed: Jun 14, 2016)	Polymorphism	Y
F5	NM_000130.4(F5):c.6665A>G (p.Asp2222Gly)	VAR_013899	255215	Thrombophilia due to activated protein C resistance|not specified	Benign/Likely benign(Last reviewed: Jun 14, 2016)	Polymorphism	Y
F5	NM_000130.4(F5):c.5290A>G (p.Met1764Val)	VAR_013897	255210	Thrombophilia due to activated protein C resistance|not specified	Benign/Likely benign(Last reviewed: Jun 14, 2016)	Polymorphism	Y
F5	NM_000130.4(F5):c.2425C>T (p.Pro809Ser)	VAR_013888	255198	Budd-Chiari syndrome|Factor V deficiency|Thrombophilia|Thrombophilia due to activated protein C resistance|not specified	Benign/Likely benign(Last reviewed: Jun 14, 2016)	Polymorphism	Y
F5	NM_000130.4(F5):c.2773A>G (p.Lys925Glu)	VAR_013890	255202	Budd-Chiari syndrome|Factor V deficiency|Thrombophilia|Thrombophilia due to activated protein C resistance|not specified	Benign/Likely benign(Last reviewed: Jun 14, 2016)	Polymorphism	Y
F5	NM_000130.4(F5):c.1238T>C (p.Met413Thr)	VAR_013887	255188	Budd-Chiari syndrome|Factor V deficiency|Thrombophilia|Thrombophilia due to activated protein C resistance|not specified	Benign/Likely benign(Last reviewed: Jun 14, 2016)	Polymorphism	Y
F5	NM_000130.4(F5):c.6443T>C (p.Met2148Thr)	VAR_021302	255214	Budd-Chiari syndrome|Factor V deficiency|Thrombophilia|Thrombophilia due to activated protein C resistance|not specified	Benign/Likely benign(Last reviewed: Jun 14, 2016)	Polymorphism	Y
F8	NM_000132.3(F8):c.1834C>T (p.Arg612Cys)	VAR_001120	10236	Hereditary factor VIII deficiency disease|not provided|not specified	Pathogenic(Last reviewed: Mar 07, 2017)	Disease	Y
F8	NM_000132.3(F8):c.3169G>A (p.Glu1057Lys)	VAR_001135	10251	Hereditary factor VIII deficiency disease	Pathogenic/Likely pathogenic(Last reviewed: Mar 18, 2016)	Disease	Y
F8	NM_000132.3(F8):c.3780C>G (p.Asp1260Glu)	VAR_001136	40999	Hemophilia A, FVIII Deficiency|Hereditary factor VIII deficiency disease|not specified	Benign(Last reviewed: Oct 11, 2016)	Polymorphism	Y
F8	NM_000132.3(F8):c.6769A>G (p.Met2257Val)	VAR_021356	41001	Hemophilia A, FVIII Deficiency|Hereditary factor VIII deficiency disease|not specified	Benign(Last reviewed: Jun 14, 2016)	Polymorphism	Y
F9	NM_000133.3(F9):c.580A>G (p.Thr194Ala)	VAR_011773	10588	Deep venous thrombosis, protection against|Hemophilia B, Factor IX Deficiency|not specified	Benign, protective(Last reviewed: Aug 15, 2016)	Polymorphism	Y
FA2H	NM_024306.4(FA2H):c.289C>G (p.Pro97Ala)	VAR_037503	129029	Spastic paraplegia|Spastic paraplegia 35|not specified	Benign/Likely benign(Last reviewed: Oct 28, 2016)	Polymorphism	Y
FAH	NM_000137.2(FAH):c.192G>T (p.Gln64His)	VAR_005207	21054	Tyrosinemia type I|not provided	Pathogenic(Last reviewed: Dec 21, 2015)	Disease	Y
FAH	NM_000137.2(FAH):c.782C>T (p.Pro261Leu)	VAR_005216	21058	Tyrosinemia type I|not provided	Pathogenic/Likely pathogenic(Last reviewed: Sep 15, 2016)	Disease	Y
FANCA	NM_000135.2(FANCA):c.755A>G (p.Asp252Gly)	VAR_009641	134293	Fanconi anemia|not specified	Benign/Likely benign(Last reviewed: Sep 22, 2016)	Disease	N
FANCA	NM_000135.2(FANCA):c.542C>T (p.Ala181Val)	VAR_009639	134287	Fanconi anemia|not specified	Benign/Likely benign(Last reviewed: Dec 30, 2016)	Disease	N
FANCA	NM_000135.2(FANCA):c.3349A>G (p.Arg1117Gly)	VAR_009651	219752	Fanconi anemia|not provided	Pathogenic(Last reviewed: Dec 22, 2016)	Disease	Y
FANCA	NM_000135.2(FANCA):c.3391A>G (p.Thr1131Ala)	VAR_009653	237048	Fanconi anemia|not provided	Pathogenic(Last reviewed: May 30, 2017)	Disease	Y
FANCA	NM_000135.2(FANCA):c.2151G>T (p.Met717Ile)	VAR_061649	134252	Fanconi anemia|not specified	Benign/Likely benign(Last reviewed: Jan 17, 2017)	Polymorphism	Y
FANCA	NM_000135.2(FANCA):c.1235C>T (p.Ala412Val)	VAR_050986	134242	Fanconi anemia|not specified	Benign/Likely benign(Last reviewed: Oct 06, 2016)	Polymorphism	Y
FANCA	NM_000135.2(FANCA):c.857A>G (p.Gln286Arg)	VAR_050985	134238	Fanconi anemia|not specified	Likely benign(Last reviewed: May 02, 2016)	Polymorphism	Y
FANCA	NM_000135.2(FANCA):c.3859G>A (p.Val1287Ile)	VAR_009655	134275	Fanconi anemia|not specified	Benign/Likely benign(Last reviewed: Jan 11, 2017)	Polymorphism	Y
FANCA	NM_000135.2(FANCA):c.1927C>G (p.Pro643Ala)	VAR_050987	134247	Fanconi anemia|not specified	Benign/Likely benign(Last reviewed: Oct 06, 2016)	Polymorphism	Y
FANCA	NM_000135.2(FANCA):c.17T>A (p.Val6Asp)	VAR_009637	134237	Fanconi anemia|not specified	Benign/Likely benign(Last reviewed: Jan 06, 2017)	Polymorphism	Y
FANCA	NM_000135.2(FANCA):c.1501G>A (p.Gly501Ser)	VAR_009644	134244	Fanconi anemia|not specified	Benign(Last reviewed: Sep 01, 2016)	Polymorphism	Y
FANCA	NM_000135.2(FANCA):c.2216C>T (p.Pro739Leu)	VAR_009645	134253	Fanconi anemia|not specified	Benign/Likely benign(Last reviewed: Dec 30, 2016)	Polymorphism	Y
FANCA	NM_000135.2(FANCA):c.796A>G (p.Thr266Ala)	VAR_017496	134294	Fanconi anemia|not specified	Benign(Last reviewed: Sep 13, 2016)	Polymorphism	Y
FANCA	NM_000135.2(FANCA):c.2426G>A (p.Gly809Asp)	VAR_009646	134254	Fanconi anemia|not specified	Benign(Last reviewed: Sep 13, 2016)	Polymorphism	Y
FANCA	NM_000135.2(FANCA):c.3982A>G (p.Thr1328Ala)	VAR_009657	134278	Fanconi anemia|not specified	Benign/Likely benign(Last reviewed: Oct 06, 2016)	Polymorphism	Y
FANCA	NM_000135.2(FANCA):c.4036G>A (p.Ala1346Thr)	VAR_038020	134281	Fanconi anemia|not specified	Benign/Likely benign(Last reviewed: Sep 01, 2016)	Unclassified	N
FANCA	NM_000135.2(FANCA):c.24C>G (p.Asn8Lys)	VAR_009638	134236	Fanconi anemia|not specified	Benign/Likely benign(Last reviewed: Dec 11, 2016)	Unclassified	N
FANCC	NM_000136.2(FANCC):c.77C>T (p.Ser26Phe)	VAR_005225	134301	Fanconi anemia|not provided|not specified	Benign/Likely benign(Last reviewed: Aug 02, 2017)	Polymorphism	Y
FANCC	NM_000136.2(FANCC):c.416G>A (p.Gly139Glu)	VAR_005226	134304	Fanconi anemia|not provided|not specified	Benign/Likely benign(Last reviewed: Jan 23, 2017)	Polymorphism	Y
FANCC	NM_000136.2(FANCC):c.1345G>A (p.Val449Met)	VAR_005230	134298	Fanconi anemia|not specified	Benign/Likely benign(Last reviewed: Jan 23, 2017)	Polymorphism	Y
FANCC	NM_000136.2(FANCC):c.1394A>G (p.Gln465Arg)	VAR_005231	134297	Fanconi anemia|not specified	Benign/Likely benign(Last reviewed: Nov 25, 2016)	Polymorphism	Y
FANCD2	NM_033084.4(FANCD2):c.577A>G (p.Thr193Ala)	VAR_025831	134328	Fanconi anemia|not provided|not specified	Benign/Likely benign(Last reviewed: Nov 15, 2016)	Polymorphism	Y
FANCD2	NM_033084.4(FANCD2):c.516A>G (p.Ile172Met)	VAR_025830	134327	Fanconi anemia|not specified	Benign/Likely benign(Last reviewed: Jan 19, 2017)	Polymorphism	Y
FANCD2	NM_033084.4(FANCD2):c.2702G>T (p.Gly901Val)	VAR_025837	134318	Fanconi anemia|not specified	Benign/Likely benign(Last reviewed: Jan 23, 2017)	Polymorphism	Y
FANCD2	NM_033084.4(FANCD2):c.983G>A (p.Arg328Gln)	VAR_025832	134310	Fanconi anemia|not provided|not specified	Benign/Likely benign(Last reviewed: Oct 03, 2016)	Polymorphism	Y
FANCD2	NM_001018115.2(FANCD2):c.1367T>G (p.Leu456Arg)	VAR_025834	134311	Fanconi anemia|not provided|not specified	Benign/Likely benign(Last reviewed: Mar 29, 2017)	Polymorphism	Y
FANCD2	NM_001018115.2(FANCD2):c.2141C>T (p.Pro714Leu)	VAR_022561	134315	Fanconi anemia|not specified	Benign(Last reviewed: Oct 10, 2016)	Polymorphism	Y
FANCE	NM_021922.2(FANCE):c.1018G>C (p.Gly340Arg)	VAR_023374	134340	Fanconi anemia|Fanconi anemia, complementation group E|not specified	Uncertain significance(Last reviewed: Jun 14, 2016)	Polymorphism	N
FANCE	NM_021922.2(FANCE):c.266G>T (p.Arg89Leu)	VAR_023372	134334	Fanconi anemia, complementation group E|not specified	Benign/Likely benign(Last reviewed: May 03, 2017)	Polymorphism	Y
FANCE	NM_021922.2(FANCE):c.611C>T (p.Ser204Leu)	VAR_023373	134333	Fanconi anemia|Fanconi anemia, complementation group E|not specified	Benign/Likely benign(Last reviewed: Jan 19, 2017)	Polymorphism	Y
FANCE	NM_021922.2(FANCE):c.1504G>A (p.Ala502Thr)	VAR_023376	134345	Fanconi anemia|not specified	Benign(Last reviewed: Oct 06, 2016)	Polymorphism	Y
FANCF	NM_022725.3(FANCF):c.959C>T (p.Pro320Leu)	VAR_022270	134351	Fanconi anemia|not specified	Benign(Last reviewed: Jan 16, 2017)	Polymorphism	Y
FANCG	NM_004629.1(FANCG):c.881G>A (p.Gly294Glu)	VAR_021103	239969	Fanconi anemia|not specified	Uncertain significance(Last reviewed: Nov 15, 2016)	Polymorphism	N
FANCG;VCP	NM_004629.1(FANCG):c.1538G>A (p.Arg513Gln)	VAR_021107	134361	Amyotrophic Lateral Sclerosis, Dominant|Fanconi anemia|Inclusion Body Myopathy, Dominant|not specified	Benign/Likely benign(Last reviewed: Jan 26, 2017)	Polymorphism	Y
FANCG;VCP	NM_004629.1(FANCG):c.890C>T (p.Thr297Ile)	VAR_020311	134367	Amyotrophic Lateral Sclerosis, Dominant|Fanconi anemia|Inclusion Body Myopathy, Dominant|not provided|not specified	Benign/Likely benign(Last reviewed: Apr 04, 2017)	Polymorphism	Y
FANCG;VCP	NM_004629.1(FANCG):c.1133C>T (p.Ser378Leu)	VAR_021105	134370	Amyotrophic Lateral Sclerosis, Dominant|Fanconi anemia|Inclusion Body Myopathy, Dominant|not specified	Benign/Likely benign(Last reviewed: Dec 30, 2016)	Polymorphism	Y
FANCI	NM_001113378.1(FANCI):c.257C>T (p.Ala86Val)	VAR_032690	257484	Fanconi anemia|not specified	Benign(Last reviewed: Aug 08, 2016)	Polymorphism	Y
FANCI	NM_001113378.1(FANCI):c.2225G>C (p.Cys742Ser)	VAR_027279	257482	Fanconi anemia|not specified	Benign(Last reviewed: Aug 08, 2016)	Polymorphism	Y
FANCI	NM_001113378.1(FANCI):c.164C>T (p.Pro55Leu)	VAR_032689	257480	Fanconi anemia|not specified	Benign/Likely benign(Last reviewed: Jan 25, 2017)	Unclassified	N
FANCI;POLG	NM_002693.2(POLG):c.3428A>G (p.Glu1143Gly)	VAR_014909	21312	Fanconi anemia|Mitochondrial diseases|Progressive sclerosing poliodystrophy|not specified	Benign/Likely benign(Last reviewed: Feb 09, 2017)	Polymorphism	Y
FANCI;POLG	NM_002693.2(POLG):c.3708G>T (p.Gln1236His)	VAR_014911	21316	Fanconi anemia|Mitochondrial diseases|POLG-Related Spectrum Disorders|not specified	Benign/Likely benign(Last reviewed: Jun 14, 2016)	Polymorphism	Y
FANCM	NM_020937.3(FANCM):c.524C>T (p.Ser175Phe)	VAR_023697	261389	Fanconi anemia|not specified	Benign(Last reviewed: Dec 05, 2016)	Polymorphism	Y
FANCM	NM_020937.3(FANCM):c.2632G>T (p.Val878Leu)	VAR_023698	261383	Fanconi anemia|not specified	Benign(Last reviewed: Sep 13, 2016)	Polymorphism	Y
FANCM	NM_020937.3(FANCM):c.5434C>G (p.Pro1812Ala)	VAR_023699	261390	Fanconi anemia|not specified	Benign/Likely benign(Last reviewed: Sep 13, 2016)	Polymorphism	Y
FANCM	NM_020937.3(FANCM):c.624A>G (p.Ile208Met)	VAR_061827	241326	Fanconi anemia|not specified	Benign(Last reviewed: Feb 17, 2017)	Polymorphism	Y
FARS2	NM_006567.4(FARS2):c.839A>G (p.Asn280Ser)	VAR_052643	137292	not specified	Benign(Last reviewed: Oct 16, 2013)	Polymorphism	Y
FAS	NM_000043.5(FAS):c.550A>G (p.Ile184Val)	VAR_052347	301530	Autoimmune lymphoproliferative syndrome|not specified	Likely benign(Last reviewed: Jun 14, 2016)	Polymorphism	Y
FAT4	NM_024582.4(FAT4):c.2420C>T (p.Ala807Val)	VAR_048581	380329	not specified	Benign(Last reviewed: Mar 29, 2016)	Polymorphism	Y
FAT4	NM_024582.4(FAT4):c.10571G>A (p.Gly3524Asp)	VAR_039861	380813	not specified	Benign(Last reviewed: Mar 29, 2016)	Polymorphism	Y
FAT4	NM_024582.4(FAT4):c.1358A>T (p.Gln453Leu)	VAR_048580	380812	not specified	Benign(Last reviewed: Mar 29, 2016)	Polymorphism	Y
FBN1	NM_000138.4(FBN1):c.7852G>A (p.Gly2618Arg)	VAR_018041	42434	Marfan syndrome|Marfan syndrome|Thoracic aortic aneurysm and aortic dissection|Thoracic aortic aneurysm and aortic dissection|not specified	Uncertain significance(Last reviewed: Feb 24, 2017)	Disease	N
FBN1	NM_000138.4(FBN1):c.5504G>A (p.Cys1835Tyr)	VAR_018021	42385	Marfan syndrome|not provided	Pathogenic/Likely pathogenic(Last reviewed: Aug 12, 2014)	Disease	Y
FBN1	NM_000138.4(FBN1):c.6431A>G (p.Asn2144Ser)	VAR_002336	16431	Marfan syndrome	Pathogenic(Last reviewed: Jul 31, 2016)	Disease	Y
FBN1	NM_000138.4(FBN1):c.7339G>A (p.Glu2447Lys)	VAR_002342	16437	Ectopia lentis, isolated, autosomal dominant|Marfan syndrome|not provided	Pathogenic/Likely pathogenic(Last reviewed: Dec 22, 2016)	Disease	Y
FBN1	NM_000138.4(FBN1):c.7339G>A (p.Glu2447Lys)	VAR_002342	16437	Ectopia lentis, isolated, autosomal dominant|Marfan syndrome|not provided	Pathogenic/Likely pathogenic(Last reviewed: Dec 22, 2016)	Disease	Y
FBN1	NM_000138.4(FBN1):c.364C>T (p.Arg122Cys)	VAR_002277	16440	Marfan syndrome|Marfan syndrome, atypical|not provided	Pathogenic(Last reviewed: Aug 29, 2016)	Disease	Y
FBN1	NM_000138.4(FBN1):c.3217G>A (p.Glu1073Lys)	VAR_002307	16457	Marfan syndrome|Marfan syndrome, neonatal|not provided|not specified	Pathogenic(Last reviewed: Apr 28, 2017)	Disease	Y
FBN1	NM_000138.4(FBN1):c.718C>T (p.Arg240Cys)	VAR_017972	16461	Acromicric dysplasia|Ectopia lentis, isolated, autosomal dominant|Ectopia lentis, isolated, autosomal dominant|Geleophysic dysplasia 2|MASS syndrome|Marfan lipodystrophy syndrome|Marfan syndrome|Marfan syndrome|Stiff skin syndrome|Weill-Marchesani syndrome 2|not provided	Pathogenic(Last reviewed: May 18, 2017)	Disease	Y
FBN1	NM_000138.4(FBN1):c.718C>T (p.Arg240Cys)	VAR_017972	16461	Acromicric dysplasia|Ectopia lentis, isolated, autosomal dominant|Ectopia lentis, isolated, autosomal dominant|Geleophysic dysplasia 2|MASS syndrome|Marfan lipodystrophy syndrome|Marfan syndrome|Marfan syndrome|Stiff skin syndrome|Weill-Marchesani syndrome 2|not provided	Pathogenic(Last reviewed: May 18, 2017)	Disease	Y
FBN1	NM_000138.4(FBN1):c.3037G>A (p.Gly1013Arg)	VAR_002298	177648	Marfan syndrome|not provided	Pathogenic(Last reviewed: Aug 02, 2016)	Disease	Y
FBN1	NM_000138.4(FBN1):c.184C>T (p.Arg62Cys)	VAR_017967	42295	Marfan syndrome|not provided	Pathogenic/Likely pathogenic(Last reviewed: Jan 14, 2016)	Disease	Y
FBN1	NM_000138.4(FBN1):c.4588C>T (p.Arg1530Cys)	VAR_018012	36078	Acromicric dysplasia|Aortic aneurysm, ascending, and dissection|Ectopia lentis, isolated, autosomal dominant|Ectopia lentis, isolated, autosomal dominant|Geleophysic dysplasia 2|MASS syndrome|Marfan lipodystrophy syndrome|Marfan syndrome|Marfan syndrome|Stiff skin syndrome|Thoracic aortic aneurysm and aortic dissection|Weill-Marchesani syndrome 2	Pathogenic(Last reviewed: May 18, 2017)	Polymorphism	N
FBN1	NM_000138.4(FBN1):c.4441A>G (p.Ser1481Gly)	VAR_065997	36074	Acromicric dysplasia|Ectopia lentis, isolated, autosomal dominant|Geleophysic dysplasia 2|MASS syndrome|Marfan lipodystrophy syndrome|Marfan syndrome|Marfan syndrome|Stiff skin syndrome|Weill-Marchesani syndrome 2|not specified	Uncertain significance(Last reviewed: May 23, 2017)	Polymorphism	N
FBN1	NM_000138.4(FBN1):c.986T>C (p.Ile329Thr)	VAR_055724	36133	Acromicric dysplasia|Ectopia lentis|Geleophysic dysplasia|MASS syndrome|Marfan syndrome|Marfan syndrome|Stiff skin syndrome|Thoracic aortic aneurysm and aortic dissection|Thoracic aortic aneurysm and aortic dissection|Weill-Marchesani syndrome|not specified	Benign/Likely benign(Last reviewed: Jan 13, 2017)	Polymorphism	Y
FBN1	NM_000138.4(FBN1):c.3442C>G (p.Pro1148Ala)	VAR_002315	36065	FNB1 POLYMORPHISM|Marfan syndrome|Marfan syndrome|Thoracic aortic aneurysm and aortic dissection|Thoracic aortic aneurysm and aortic dissection|not specified	Benign(Last reviewed: Jan 29, 2017)	Polymorphism	Y
FBN1	NM_000138.4(FBN1):c.79G>A (p.Ala27Thr)	VAR_014663	163486	Acromicric dysplasia|Ectopia lentis|Geleophysic dysplasia|MASS syndrome|Marfan syndrome|Marfan syndrome|Stiff skin syndrome|Thoracic aortic aneurysm and aortic dissection|Thoracic aortic aneurysm and aortic dissection|Weill-Marchesani syndrome|not specified	Benign/Likely benign(Last reviewed: Oct 30, 2016)	Polymorphism	Y
FBN1	NM_000138.4(FBN1):c.6832C>T (p.Pro2278Ser)	VAR_055734	36108	Acromicric dysplasia|Ectopia lentis|Geleophysic dysplasia|MASS syndrome|Marfan syndrome|Marfan syndrome|Stiff skin syndrome|Thoracic aortic aneurysm and aortic dissection|Thoracic aortic aneurysm and aortic dissection|Weill-Marchesani syndrome|not provided|not specified	Benign/Likely benign(Last reviewed: Mar 31, 2017)	Polymorphism	Y
FBN2	NM_001999.3(FBN2):c.6833C>T (p.Thr2278Met)	VAR_055415	225102	Inborn genetic diseases|not specified	Uncertain significance(Last reviewed: Apr 28, 2017)	Polymorphism	N
FBN2	NM_001999.3(FBN2):c.2893G>A (p.Val965Ile)	VAR_002349	129039	Congenital contractural arachnodactyly|Thoracic aortic aneurysm and aortic dissection|not specified	Benign(Last reviewed: Jun 05, 2017)	Polymorphism	Y
FBN2	NM_001999.3(FBN2):c.7739C>T (p.Ser2580Leu)	VAR_055417	129051	Congenital contractural arachnodactyly|Thoracic aortic aneurysm and aortic dissection|not specified	Benign/Likely benign(Last reviewed: Jun 12, 2017)	Polymorphism	Y
FBN2	NM_001999.3(FBN2):c.6931A>G (p.Met2311Val)	VAR_055416	129046	Congenital contractural arachnodactyly|Thoracic aortic aneurysm and aortic dissection|not specified	Benign(Last reviewed: Jun 07, 2017)	Polymorphism	Y
FBN2	NM_001999.3(FBN2):c.4312G>A (p.Glu1438Lys)	VAR_072656	137330	Congenital contractural arachnodactyly|Thoracic aortic aneurysm and aortic dissection|not specified	Benign/Likely benign(Last reviewed: Jan 27, 2017)	Polymorphism	Y
FBP1	NM_000507.3(FBP1):c.653G>A (p.Arg218Lys)	VAR_022212	256323	Fructose-biphosphatase deficiency|not specified	Benign(Last reviewed: Jun 14, 2016)	Polymorphism	Y
FBXL4	NM_012160.4(FBXL4):c.1444C>T (p.Arg482Trp)	VAR_070859	66093	Global developmental delay|Mitochondrial DNA depletion syndrome 13 (encephalomyopathic type)|Mitochondrial encephalomyopathy|not provided	Pathogenic/Likely pathogenic(Last reviewed: Aug 10, 2017)	Disease	Y
FBXO7	NM_012179.3(FBXO7):c.345G>A (p.Met115Ile)	VAR_021408	195275	Parkinson Disease, Recessive|not specified	Benign(Last reviewed: Jun 14, 2016)	Polymorphism	Y
FERMT1	NM_017671.4(FERMT1):c.1577G>A (p.Arg526Lys)	VAR_014398	260867	Kindler's syndrome|not specified	Benign(Last reviewed: Jun 14, 2016)	Polymorphism	Y
FGA	NM_000508.4(FGA):c.991A>G (p.Thr331Ala)	VAR_011610	16420	Afibrinogenemia, congenital|Familial visceral amyloidosis, Ostertag type|Venous thromboembolism, susceptibility to|not specified	Benign, risk factor(Last reviewed: Jun 14, 2016)	Polymorphism	Y
FGB	NM_005141.4(FGB):c.1433G>A (p.Arg478Lys)	VAR_002408	16384	Afibrinogenemia, congenital|FIBRINOGEN BALTIMORE 2|not specified	Benign/Likely benign, other(Last reviewed: Jun 14, 2016)	Polymorphism	Y
FGF23	NM_020638.2(FGF23):c.536G>A (p.Arg179Gln)	VAR_010719	36135	Autosomal dominant hypophosphatemic rickets	Pathogenic(Last reviewed: Dec 05, 2013)	Disease	Y
FGF23	NM_020638.2(FGF23):c.535C>T (p.Arg179Trp)	VAR_010718	5026	Autosomal dominant hypophosphatemic rickets|not provided	Pathogenic/Likely pathogenic(Last reviewed: Nov 20, 2015)	Disease	Y
FGFR1	NM_023110.2(FGFR1):c.2314C>T (p.Pro772Ser)	VAR_017892	194891	Craniosynostosis|Hypogonadism with anosmia|Nonsyndromic Trigonocephaly|Osteoglophonic dysplasia|Pfeiffer syndrome|not provided|not specified	Benign/Likely benign(Last reviewed: Jun 14, 2016)	Disease	N
FGFR2	NM_000141.4(FGFR2):c.1124A>G (p.Tyr375Cys)	VAR_017275	13277	Cutis Gyrata syndrome of Beare and Stevenson|Endometrial carcinoma|Endometrial neoplasm|not provided	Pathogenic/Likely pathogenic(Last reviewed: Sep 17, 2016)	Disease	Y
FGFR2	NM_000141.4(FGFR2):c.1124A>G (p.Tyr375Cys)	VAR_017275	13277	Cutis Gyrata syndrome of Beare and Stevenson|Endometrial carcinoma|Endometrial neoplasm|not provided	Pathogenic/Likely pathogenic(Last reviewed: Sep 17, 2016)	Disease	Y
FGFR2	NM_000141.4(FGFR2):c.1024T>A (p.Cys342Ser)	VAR_004138	13267	Antley-Bixler syndrome without genital anomalies or disordered steroidogenesis|Crouzon syndrome|Jackson-Weiss syndrome|Pfeiffer syndrome|not provided	Pathogenic(Last reviewed: Apr 10, 2017)	Disease	Y
FGFR2	NM_000141.4(FGFR2):c.1024T>A (p.Cys342Ser)	VAR_004138	13267	Antley-Bixler syndrome without genital anomalies or disordered steroidogenesis|Crouzon syndrome|Jackson-Weiss syndrome|Pfeiffer syndrome|not provided	Pathogenic(Last reviewed: Apr 10, 2017)	Disease	Y
FGFR2	NM_000141.4(FGFR2):c.1024T>A (p.Cys342Ser)	VAR_004138	13267	Antley-Bixler syndrome without genital anomalies or disordered steroidogenesis|Crouzon syndrome|Jackson-Weiss syndrome|Pfeiffer syndrome|not provided	Pathogenic(Last reviewed: Apr 10, 2017)	Disease	Y
FGFR2	NM_000141.4(FGFR2):c.1024T>A (p.Cys342Ser)	VAR_004138	13267	Antley-Bixler syndrome without genital anomalies or disordered steroidogenesis|Crouzon syndrome|Jackson-Weiss syndrome|Pfeiffer syndrome|not provided	Pathogenic(Last reviewed: Apr 10, 2017)	Disease	Y
FGFR2	NM_000141.4(FGFR2):c.1052C>G (p.Ser351Cys)	VAR_004143	13286	Antley-Bixler syndrome without genital anomalies or disordered steroidogenesis|Pfeiffer syndrome|Pfeiffer syndrome, type III|not provided	Pathogenic(Last reviewed: Sep 17, 2016)	Disease	Y
FGFR2	NM_000141.4(FGFR2):c.1052C>G (p.Ser351Cys)	VAR_004143	13286	Antley-Bixler syndrome without genital anomalies or disordered steroidogenesis|Pfeiffer syndrome|Pfeiffer syndrome, type III|not provided	Pathogenic(Last reviewed: Sep 17, 2016)	Disease	Y
FGFR2	NM_000141.4(FGFR2):c.1052C>G (p.Ser351Cys)	VAR_004143	13286	Antley-Bixler syndrome without genital anomalies or disordered steroidogenesis|Pfeiffer syndrome|Pfeiffer syndrome, type III|not provided	Pathogenic(Last reviewed: Sep 17, 2016)	Disease	Y
FGFR2	NM_000141.4(FGFR2):c.799T>C (p.Ser267Pro)	VAR_004118	13290	Crouzon syndrome|Neoplasm of stomach|Pfeiffer syndrome|not provided	Pathogenic(Last reviewed: Sep 17, 2016)	Disease	Y
FGFR2	NM_000141.4(FGFR2):c.1141T>G (p.Tyr381Asp)	VAR_067977	29856	Bent bone dysplasia syndrome|Inborn genetic diseases	Pathogenic/Likely pathogenic(Last reviewed: Nov 20, 2015)	Disease	Y
FGFR2	NM_000141.4(FGFR2):c.758C>G (p.Pro253Arg)	VAR_004117	13273	Acrocephalosyndactyly type I|Head and Neck Neoplasms|not provided	Pathogenic/Likely pathogenic(Last reviewed: Mar 30, 2017)	Disease	Y
FGFR2	NM_000141.4(FGFR2):c.833G>T (p.Cys278Phe)	VAR_004121	265431	Pfeiffer syndrome|not provided	Pathogenic(Last reviewed: Sep 17, 2016)	Disease	Y
FGFR2	NM_000141.4(FGFR2):c.833G>T (p.Cys278Phe)	VAR_004121	265431	Pfeiffer syndrome|not provided	Pathogenic(Last reviewed: Sep 17, 2016)	Disease	Y
FGFR2	NM_000141.4(FGFR2):c.833G>T (p.Cys278Phe)	VAR_004121	265431	Pfeiffer syndrome|not provided	Pathogenic(Last reviewed: Sep 17, 2016)	Disease	Y
FGFR2	NM_022970.3(FGFR2):c.755C>G (p.Ser252Trp)	VAR_004115	13272	Acrocephalosyndactyly|Acrocephalosyndactyly type I|Adenocarcinoma of stomach|Endometrial Endometrioid Adenocarcinoma, Variant with Squamous Differentiation|Endometrial carcinoma|Endometrial neoplasm|Malignant neoplasm of body of uterus|Uterine Carcinosarcoma|not provided	Pathogenic/Likely pathogenic(Last reviewed: Sep 17, 2016)	Disease	Y
FGFR2	NM_022970.3(FGFR2):c.755C>G (p.Ser252Trp)	VAR_004115	13272	Acrocephalosyndactyly|Acrocephalosyndactyly type I|Adenocarcinoma of stomach|Endometrial Endometrioid Adenocarcinoma, Variant with Squamous Differentiation|Endometrial carcinoma|Endometrial neoplasm|Malignant neoplasm of body of uterus|Uterine Carcinosarcoma|not provided	Pathogenic/Likely pathogenic(Last reviewed: Sep 17, 2016)	Disease	Y
FGFR2	NM_000141.4(FGFR2):c.17G>C (p.Arg6Pro)	VAR_017258	134386	Acrocephalosyndactyly type I|Craniosynostosis|Crouzon syndrome|Cutis Gyrata syndrome of Beare and Stevenson|Isolated coronal synostosis|Jackson-Weiss syndrome|Levy-Hollister syndrome|Pfeiffer syndrome|Saethre-Chotzen syndrome|not specified	Benign(Last reviewed: Jun 14, 2016)	Polymorphism	Y
FGFR2	NM_000141.4(FGFR2):c.170C>T (p.Ser57Leu)	VAR_042204	134390	Acrocephalosyndactyly type I|Craniosynostosis|Crouzon syndrome|Cutis Gyrata syndrome of Beare and Stevenson|Isolated coronal synostosis|Jackson-Weiss syndrome|Levy-Hollister syndrome|Pfeiffer syndrome|Saethre-Chotzen syndrome|not provided|not specified	Benign/Likely benign(Last reviewed: Sep 22, 2016)	Polymorphism	Y
FGFR2	NM_000141.4(FGFR2):c.557T>C (p.Met186Thr)	VAR_017260	134392	Crouzon syndrome|not provided|not specified	Benign(Last reviewed: Jul 22, 2016)	Polymorphism	Y
FGFR3	NM_000142.4(FGFR3):c.742C>T (p.Arg248Cys)	VAR_004148	16332	Adenocarcinoma of lung|Bell-shaped thorax|Bowed humerus|Carcinoma|Disproportionate short-limb short stature|Epidermal nevus|Femoral bowing|Growth delay|Keratosis, seborrheic|Lethal short-limbed short stature|Lower limb undergrowth|Multiple myeloma|Narrow chest|Short ribs|Short stature|Skeletal dysplasia|Skeletal dysplasia with acanthosis nigricans|Small for gestational age|Squamous cell carcinoma…	Pathogenic/Likely pathogenic(Last reviewed: Jun 06, 2017)	Disease	Y
FGFR3	NM_000142.4(FGFR3):c.742C>T (p.Arg248Cys)	VAR_004148	16332	Adenocarcinoma of lung|Bell-shaped thorax|Bowed humerus|Carcinoma|Disproportionate short-limb short stature|Epidermal nevus|Femoral bowing|Growth delay|Keratosis, seborrheic|Lethal short-limbed short stature|Lower limb undergrowth|Multiple myeloma|Narrow chest|Short ribs|Short stature|Skeletal dysplasia|Skeletal dysplasia with acanthosis nigricans|Small for gestational age|Squamous cell carcinoma…	Pathogenic/Likely pathogenic(Last reviewed: Jun 06, 2017)	Disease	Y
FGFR3	NM_000142.4(FGFR3):c.742C>T (p.Arg248Cys)	VAR_004148	16332	Adenocarcinoma of lung|Bell-shaped thorax|Bowed humerus|Carcinoma|Disproportionate short-limb short stature|Epidermal nevus|Femoral bowing|Growth delay|Keratosis, seborrheic|Lethal short-limbed short stature|Lower limb undergrowth|Multiple myeloma|Narrow chest|Short ribs|Short stature|Skeletal dysplasia|Skeletal dysplasia with acanthosis nigricans|Small for gestational age|Squamous cell carcinoma…	Pathogenic/Likely pathogenic(Last reviewed: Jun 06, 2017)	Disease	Y
FGFR3	NM_000142.4(FGFR3):c.742C>T (p.Arg248Cys)	VAR_004148	16332	Adenocarcinoma of lung|Bell-shaped thorax|Bowed humerus|Carcinoma|Disproportionate short-limb short stature|Epidermal nevus|Femoral bowing|Growth delay|Keratosis, seborrheic|Lethal short-limbed short stature|Lower limb undergrowth|Multiple myeloma|Narrow chest|Short ribs|Short stature|Skeletal dysplasia|Skeletal dysplasia with acanthosis nigricans|Small for gestational age|Squamous cell carcinoma…	Pathogenic/Likely pathogenic(Last reviewed: Jun 06, 2017)	Disease	Y
FGFR3	NM_000142.4(FGFR3):c.746C>G (p.Ser249Cys)	VAR_004149	16339	Bladder carcinoma|Carcinoma|Carcinoma of cervix|Keratosis, seborrheic|Malignant tumor of urinary bladder|Papillary renal cell carcinoma, sporadic|Squamous cell carcinoma of lung|Squamous cell carcinoma of the head and neck|Thanatophoric dysplasia type 1|Transitional cell carcinoma of the bladder|not provided	Pathogenic/Likely pathogenic(Last reviewed: Jul 24, 2017)	Disease	Y
FGFR3	NM_000142.4(FGFR3):c.746C>G (p.Ser249Cys)	VAR_004149	16339	Bladder carcinoma|Carcinoma|Carcinoma of cervix|Keratosis, seborrheic|Malignant tumor of urinary bladder|Papillary renal cell carcinoma, sporadic|Squamous cell carcinoma of lung|Squamous cell carcinoma of the head and neck|Thanatophoric dysplasia type 1|Transitional cell carcinoma of the bladder|not provided	Pathogenic/Likely pathogenic(Last reviewed: Jul 24, 2017)	Disease	Y
FGFR3	NM_000142.4(FGFR3):c.746C>G (p.Ser249Cys)	VAR_004149	16339	Bladder carcinoma|Carcinoma|Carcinoma of cervix|Keratosis, seborrheic|Malignant tumor of urinary bladder|Papillary renal cell carcinoma, sporadic|Squamous cell carcinoma of lung|Squamous cell carcinoma of the head and neck|Thanatophoric dysplasia type 1|Transitional cell carcinoma of the bladder|not provided	Pathogenic/Likely pathogenic(Last reviewed: Jul 24, 2017)	Disease	Y
FGFR3	NM_000142.4(FGFR3):c.746C>G (p.Ser249Cys)	VAR_004149	16339	Bladder carcinoma|Carcinoma|Carcinoma of cervix|Keratosis, seborrheic|Malignant tumor of urinary bladder|Papillary renal cell carcinoma, sporadic|Squamous cell carcinoma of lung|Squamous cell carcinoma of the head and neck|Thanatophoric dysplasia type 1|Transitional cell carcinoma of the bladder|not provided	Pathogenic/Likely pathogenic(Last reviewed: Jul 24, 2017)	Disease	Y
FGFR3	NM_000142.4(FGFR3):c.1118A>G (p.Tyr373Cys)	VAR_004153	16342	Bladder carcinoma|Carcinoma|Myeloproliferative disorder|Papillary renal cell carcinoma, sporadic|Thanatophoric dysplasia type 1|Transitional cell carcinoma of the bladder|not provided|not specified	Pathogenic/Likely pathogenic(Last reviewed: Feb 02, 2017)	Disease	Y
FGFR3	NM_000142.4(FGFR3):c.1118A>G (p.Tyr373Cys)	VAR_004153	16342	Bladder carcinoma|Carcinoma|Myeloproliferative disorder|Papillary renal cell carcinoma, sporadic|Thanatophoric dysplasia type 1|Transitional cell carcinoma of the bladder|not provided|not specified	Pathogenic/Likely pathogenic(Last reviewed: Feb 02, 2017)	Disease	Y
FGFR3	NM_000142.4(FGFR3):c.1138G>A (p.Gly380Arg)	VAR_004155	16327	Achondroplasia|Epidermal nevus|not provided|not specified	Pathogenic(Last reviewed: Jun 19, 2017)	Disease	Y
FGFR3	NM_000142.4(FGFR3):c.1138G>A (p.Gly380Arg)	VAR_004155	16327	Achondroplasia|Epidermal nevus|not provided|not specified	Pathogenic(Last reviewed: Jun 19, 2017)	Disease	Y
FGFR3	NM_000142.4(FGFR3):c.1172C>A (p.Ala391Glu)	VAR_004156	16329	Carcinoma|Craniosynostosis|Crouzon syndrome with acanthosis nigricans|not provided	Pathogenic/Likely pathogenic(Last reviewed: Oct 20, 2016)	Disease	Y
FGFR3	NM_000142.4(FGFR3):c.1620C>A (p.Asn540Lys)	VAR_004158	16337	Achondroplasia|Hypochondroplasia|not provided|not specified	Pathogenic(Last reviewed: Sep 22, 2016)	Disease	Y
FGFR3	NM_000142.4(FGFR3):c.749C>G (p.Pro250Arg)	VAR_004150	16340	Craniosynostosis|Muenke syndrome|Saethre-Chotzen syndrome|not provided|not specified	Pathogenic(Last reviewed: Sep 13, 2017)	Disease	Y
FGFR3	NM_000142.4(FGFR3):c.1150T>C (p.Phe384Leu)	VAR_022168	134404	not provided|not specified	Benign/Likely benign(Last reviewed: Sep 22, 2016)	Polymorphism	Y
FH	NM_000143.3(FH):c.320A>C (p.Asn107Thr)	VAR_013497	92455	Hereditary cancer-predisposing syndrome|Hereditary leiomyomatosis and renal cell cancer|not provided	Pathogenic/Likely pathogenic(Last reviewed: Jan 17, 2017)	Disease	Y
FH	NM_000143.3(FH):c.554A>G (p.Gln185Arg)	VAR_013500	214433	Hereditary cancer-predisposing syndrome|Hereditary leiomyomatosis and renal cell cancer|not provided	Likely pathogenic(Last reviewed: Mar 17, 2017)	Disease	Y
FIG4	NM_014845.5(FIG4):c.1090A>T (p.Met364Leu)	VAR_020378	137375	Amyotrophic Lateral Sclerosis, Dominant|Charcot-Marie-Tooth, Type 4|not specified	Benign/Likely benign(Last reviewed: Jun 14, 2016)	Polymorphism	Y
FIG4	NM_014845.5(FIG4):c.1961T>C (p.Val654Ala)	VAR_022826	137377	Amyotrophic Lateral Sclerosis, Dominant|Charcot-Marie-Tooth, Type 4|not specified	Benign(Last reviewed: Oct 14, 2016)	Polymorphism	Y
FKBP10	NM_021939.3(FKBP10):c.590A>G (p.Lys197Arg)	VAR_050625	261438	Osteogenesis Imperfecta, Recessive|not specified	Benign/Likely benign(Last reviewed: Jun 14, 2016)	Polymorphism	Y
FKRP	NM_024301.4(FKRP):c.1073C>T (p.Pro358Leu)	VAR_065062	167072	Walker-Warburg congenital muscular dystrophy|not specified	Uncertain significance(Last reviewed: Mar 17, 2017)	Disease	N
FKRP	NM_024301.4(FKRP):c.898G>A (p.Val300Met)	VAR_065061	241460	Walker-Warburg congenital muscular dystrophy|not specified	Uncertain significance(Last reviewed: Nov 24, 2016)	Disease	N
FKRP	NM_024301.4(FKRP):c.1387A>G (p.Asn463Asp)	VAR_065063	4235	Congenital muscular dystrophy-dystroglycanopathy (with or without mental retardation) type B5|Congenital muscular dystrophy-dystroglycanopathy with brain and eye anomalies type A5|Congenital muscular dystrophy-dystroglycanopathy without mental retardation, type B5|Limb-girdle muscular dystrophy-dystroglycanopathy, type C5|Muscular dystrophy|not provided	Pathogenic(Last reviewed: Jun 30, 2016)	Disease	Y
FKRP	NM_024301.4(FKRP):c.826C>A (p.Leu276Ile)	VAR_018285	4221	Congenital muscular dystrophy-dystroglycanopathy (with or without mental retardation) type B5|Congenital muscular dystrophy-dystroglycanopathy (with or without mental retardation) type B5|Congenital muscular dystrophy-dystroglycanopathy with brain and eye anomalies type A5|Congenital muscular dystrophy-dystroglycanopathy with brain and eye anomalies type A5|Limb-girdle muscular dystrophy-dystrogl…	Pathogenic(Last reviewed: May 18, 2017)	Disease	Y
FKTN	NM_001079802.1(FKTN):c.608G>A (p.Arg203Gln)	VAR_033927	93522	Dilated Cardiomyopathy, Recessive|Fukuyama congenital muscular dystrophy|not specified	Benign/Likely benign(Last reviewed: Jun 14, 2016)	Polymorphism	Y
FKTN	NM_001079802.1(FKTN):c.1336A>G (p.Asn446Asp)	VAR_018279	36138	Cardiomyopathy|Walker-Warburg congenital muscular dystrophy|not specified	Benign/Likely benign(Last reviewed: Jan 21, 2017)	Polymorphism	Y
FLNA	NM_001456.3(FLNA):c.1582G>A (p.Val528Met)	VAR_031309	193845	Frontometaphyseal dysplasia|Melnick-Needles syndrome|Oto-palato-digital syndrome, type II|Periventricular nodular heterotopia 1|Periventricular nodular heterotopia 1|not specified	Benign/Likely benign(Last reviewed: Dec 05, 2016)	Disease	N
FLNA	NM_001110556.1(FLNA):c.3557C>T (p.Ser1186Leu)	VAR_015721	11761	Frontometaphyseal dysplasia|not provided	Pathogenic/Likely pathogenic(Last reviewed: Nov 01, 2015)	Disease	Y
FLNA	NM_001110556.1(FLNA):c.3596C>T (p.Ser1199Leu)	VAR_015704	11759	Melnick-Needles syndrome|Oto-palato-digital syndrome, type II	Pathogenic(Last reviewed: Dec 23, 2016)	Disease	Y
FLNA	NM_001110556.1(FLNA):c.3035C>T (p.Ser1012Leu)	VAR_031310	93753	Frontometaphyseal dysplasia|Melnick-Needles syndrome|Oto-palato-digital syndrome, type II|Periventricular nodular heterotopia 1|not provided|not specified	Benign/Likely benign(Last reviewed: Jan 26, 2017)	Polymorphism	Y
FLNA	NM_001110556.1(FLNA):c.1286C>T (p.Thr429Met)	VAR_069803	93748	Frontometaphyseal dysplasia|Melnick-Needles syndrome|Oto-palato-digital syndrome, type II|Periventricular nodular heterotopia 1|not specified	Benign/Likely benign(Last reviewed: Jan 19, 2017)	Polymorphism	Y
FLNA	NM_001110556.1(FLNA):c.5290G>A (p.Ala1764Thr)	VAR_012835	93765	Frontometaphyseal dysplasia|Melnick-Needles syndrome|Oto-palato-digital syndrome, type II|Periventricular nodular heterotopia 1|not provided|not specified	Benign/Likely benign(Last reviewed: Jan 26, 2017)	Polymorphism	Y
FLNB	NM_001457.3(FLNB):c.3469G>A (p.Asp1157Asn)	VAR_017183	258106	FLNB-Related Spectrum Disorders|not specified	Benign/Likely benign(Last reviewed: Jun 14, 2016)	Polymorphism	Y
FLNB	NM_001457.3(FLNB):c.4411G>A (p.Val1471Met)	VAR_031393	258114	FLNB-Related Spectrum Disorders|not specified	Benign/Likely benign(Last reviewed: Jun 14, 2016)	Polymorphism	Y
FLNB	NM_001457.3(FLNB):c.3535G>A (p.Glu1179Lys)	VAR_031392	346333	FLNB-Related Spectrum Disorders|not specified	Benign/Likely benign(Last reviewed: Oct 10, 2016)	Polymorphism	Y
FLNC	NM_001458.4(FLNC):c.4700G>A (p.Arg1567Gln)	VAR_015705	129091	not specified	Benign(Last reviewed: Feb 08, 2016)	Polymorphism	Y
FLT4	NM_182925.4(FLT4):c.2670C>G (p.His890Gln)	VAR_018410	263039	not specified	Benign(Last reviewed: Mar 29, 2016)	Polymorphism	Y
FLT4	NM_182925.4(FLT4):c.1921C>T (p.Pro641Ser)	VAR_018408	263032	not provided|not specified	Likely benign(Last reviewed: Jul 13, 2016)	Polymorphism	Y
FLVCR1	NM_014053.3(FLVCR1):c.154G>C (p.Ala52Pro)	VAR_050297	129102	Posterior column ataxia with retinitis pigmentosa|not specified	Benign/Likely benign(Last reviewed: Jun 14, 2016)	Polymorphism	Y
FLVCR2	NM_017791.2(FLVCR2):c.47T>C (p.Val16Ala)	VAR_018271	95818	Proliferative vasculopathy and hydranencephaly-hydrocephaly syndrome|not specified	Benign(Last reviewed: Jun 14, 2016)	Polymorphism	Y
FMO3	NM_006894.5(FMO3):c.830T>C (p.Val277Ala)	VAR_014845	260077	Trimethylaminuria|not specified	Benign/Likely benign(Last reviewed: Jun 14, 2016)	Polymorphism	Y
FMO3	NM_006894.5(FMO3):c.923A>G (p.Glu308Gly)	VAR_002427	16318	Trimethylaminuria|Trimethylaminuria|Trimethylaminuria, mild|not specified	Benign(Last reviewed: Jun 14, 2016)	Polymorphism	Y
FOXH1	NM_003923.2(FOXH1):c.373A>T (p.Thr125Ser)	VAR_011382	196368	Holoprosencephaly|Holoprosencephaly sequence|not specified	Benign/Likely benign(Last reviewed: Jun 14, 2017)	Unclassified	N
FOXH1	NM_003923.2(FOXH1):c.338G>C (p.Ser113Thr)	VAR_011381	94385	Holoprosencephaly|not specified	Benign/Likely benign(Last reviewed: Jun 14, 2016)	Unclassified	N
FOXL2	NM_023067.3(FOXL2):c.536C>G (p.Ala179Gly)	VAR_021201	261662	Blepharophimosis, ptosis, and epicanthus inversus|not specified	Benign(Last reviewed: Nov 03, 2016)	Polymorphism	Y
FOXN1	NM_003593.2(FOXN1):c.205C>T (p.Arg69Cys)	VAR_020025	322414	T-cell immunodeficiency, congenital alopecia and nail dystrophy|not specified	Benign(Last reviewed: Jun 14, 2016)	Polymorphism	Y
FOXN1	NM_003593.2(FOXN1):c.1795G>C (p.Ala599Pro)	VAR_020026	322436	T-cell immunodeficiency, congenital alopecia and nail dystrophy|not specified	Benign(Last reviewed: Jun 14, 2016)	Polymorphism	Y
FOXP1	NM_032682.5(FOXP1):c.1709A>G (p.Asn570Ser)	VAR_065073	211041	Intellectual Disability with Language Impairment and Autistic Features|not specified	Benign/Likely benign(Last reviewed: Sep 05, 2016)	Polymorphism	Y
FOXP1	NM_032682.5(FOXP1):c.643C>G (p.Pro215Ala)	VAR_065069	129109	Intellectual Disability with Language Impairment and Autistic Features|not specified	Likely benign(Last reviewed: Jun 14, 2016)	Polymorphism	Y
FRAS1	NM_025074.6(FRAS1):c.1396T>A (p.Leu466Ile)	VAR_055812	261803	Cryptophthalmos syndrome|not specified	Benign(Last reviewed: Jun 14, 2016)	Polymorphism	Y
FRAS1	NM_025074.6(FRAS1):c.3406G>A (p.Glu1136Lys)	VAR_055817	196042	Cryptophthalmos syndrome|not specified	Benign(Last reviewed: Jun 14, 2016)	Polymorphism	Y
FRAS1	NM_025074.6(FRAS1):c.2060A>G (p.Asp687Gly)	VAR_069151	261804	Cryptophthalmos syndrome|not specified	Benign(Last reviewed: Jun 14, 2016)	Polymorphism	Y
FRAS1	NM_025074.6(FRAS1):c.1769T>C (p.Met590Thr)	VAR_055813	235757	Cryptophthalmos syndrome|not provided	Likely benign(Last reviewed: Jun 14, 2016)	Polymorphism	Y
FRAS1	NM_025074.6(FRAS1):c.95A>G (p.Asp32Gly)	VAR_069150	261821	Cryptophthalmos syndrome|not specified	Benign(Last reviewed: Jun 14, 2016)	Polymorphism	Y
FRAS1	NM_025074.6(FRAS1):c.2450C>T (p.Ala817Val)	VAR_055814	261805	Cryptophthalmos syndrome|not specified	Benign(Last reviewed: Jun 14, 2016)	Polymorphism	Y
FREM1	NM_144966.5(FREM1):c.6428A>C (p.Gln2143Pro)	VAR_047325	262545	Marles Greenberg Persaud syndrome|not specified	Benign(Last reviewed: Jun 14, 2016)	Polymorphism	Y
FREM1	NM_144966.5(FREM1):c.4727A>T (p.Asn1576Ile)	VAR_047324	262540	Marles Greenberg Persaud syndrome|not specified	Benign/Likely benign(Last reviewed: Jun 14, 2016)	Polymorphism	Y
FREM1	NM_144966.5(FREM1):c.1315G>C (p.Val439Leu)	VAR_047317	262534	Marles Greenberg Persaud syndrome|not specified	Benign(Last reviewed: Jun 14, 2016)	Polymorphism	Y
FREM1	NM_144966.5(FREM1):c.2408C>A (p.Ser803Tyr)	VAR_047319	262535	Marles Greenberg Persaud syndrome|not specified	Benign(Last reviewed: Jun 14, 2016)	Polymorphism	Y
FREM1	NM_144966.5(FREM1):c.2587C>G (p.Leu863Val)	VAR_047320	194680	Marles Greenberg Persaud syndrome|not specified	Benign(Last reviewed: Jun 14, 2016)	Polymorphism	Y
FREM2	NM_207361.5(FREM2):c.5003G>A (p.Arg1668His)	VAR_037570	193534	Cryptophthalmos syndrome|not specified	Benign/Likely benign(Last reviewed: Jun 14, 2016)	Polymorphism	Y
FREM2	NM_207361.5(FREM2):c.3116T>A (p.Met1039Lys)	VAR_033935	235588	Cryptophthalmos syndrome|not provided	Benign/Likely benign(Last reviewed: Jun 14, 2016)	Polymorphism	Y
FREM2	NM_207361.5(FREM2):c.3209T>C (p.Phe1070Ser)	VAR_033936	193525	Cryptophthalmos syndrome|not specified	Benign(Last reviewed: Jun 14, 2016)	Polymorphism	Y
FREM2	NM_207361.5(FREM2):c.8885C>T (p.Ala2962Val)	VAR_037571	235742	Cryptophthalmos syndrome|not provided	Benign/Likely benign(Last reviewed: Jun 14, 2016)	Polymorphism	Y
FREM2	NM_207361.5(FREM2):c.6977C>T (p.Thr2326Ile)	VAR_023204	263300	Cryptophthalmos syndrome|not specified	Benign(Last reviewed: Jun 14, 2016)	Polymorphism	Y
FRMD7	NM_194277.2(FRMD7):c.842C>T (p.Ser281Leu)	VAR_028959	263090	Infantile Nystagmus|not specified	Benign/Likely benign(Last reviewed: Jun 14, 2016)	Polymorphism	Y
FRMD7	NM_194277.2(FRMD7):c.1403G>A (p.Arg468His)	VAR_028962	263087	Infantile Nystagmus|not specified	Benign/Likely benign(Last reviewed: Jun 14, 2016)	Polymorphism	Y
FSHR	NM_000145.3(FSHR):c.919G>A (p.Ala307Thr)	VAR_013903	16246	Ovarian Dysgenesis|Ovarian hyperstimulation syndrome|Ovarian response to FSH stimulation|not specified	Benign, drug response(Last reviewed: Jun 14, 2016)	Polymorphism	Y
FUCA1	NM_000147.4(FUCA1):c.4C>T (p.Arg2Trp)	VAR_049106	193052	Fucosidosis|not specified	Benign(Last reviewed: Jun 14, 2016)	Polymorphism	Y
FUCA1	NM_000147.4(FUCA1):c.29C>G (p.Pro10Arg)	VAR_016233	193053	Fucosidosis|not specified	Benign(Last reviewed: Jun 14, 2016)	Polymorphism	Y
FYCO1	NM_024513.3(FYCO1):c.3001A>G (p.Asn1001Asp)	VAR_027011	261728	Congenital cataract|not specified	Benign(Last reviewed: Jun 14, 2016)	Polymorphism	Y
FYCO1	NM_024513.3(FYCO1):c.1339C>T (p.Arg447Cys)	VAR_056882	261720	Congenital cataract|not specified	Benign(Last reviewed: Jun 14, 2016)	Polymorphism	Y
FYCO1	NM_024513.3(FYCO1):c.2980G>A (p.Glu994Lys)	VAR_056883	261726	Congenital cataract|not specified	Benign/Likely benign(Last reviewed: Jun 14, 2016)	Polymorphism	Y
FYCO1	NM_024513.3(FYCO1):c.962G>C (p.Gly321Ala)	VAR_027008	261738	Congenital cataract|not specified	Benign(Last reviewed: Jun 14, 2016)	Polymorphism	Y
FYCO1	NM_024513.3(FYCO1):c.2036C>T (p.Ala679Val)	VAR_027010	261722	Congenital cataract|not specified	Benign(Last reviewed: Jun 14, 2016)	Polymorphism	Y
FYCO1	NM_024513.3(FYCO1):c.749G>A (p.Arg250Gln)	VAR_027006	261736	Congenital cataract|not specified	Benign(Last reviewed: Jun 14, 2016)	Polymorphism	Y
FZD4	NM_012193.3(FZD4):c.502C>T (p.Pro168Ser)	VAR_063926	306407	Familial exudative vitreoretinopathy|not specified	Benign/Likely benign(Last reviewed: Jun 14, 2016)	Polymorphism	Y
FZD4	NM_012193.3(FZD4):c.97C>T (p.Pro33Ser)	VAR_063920	193358	Familial exudative vitreoretinopathy|not specified	Benign/Likely benign(Last reviewed: Jun 14, 2016)	Unclassified	N
G6PC	NM_000151.3(G6PC):c.883C>T (p.Arg295Cys)	VAR_005251	11999	Glycogen storage disease type 1A|Glycogen storage disease, type I	Pathogenic/Likely pathogenic(Last reviewed: Jun 14, 2016)	Disease	Y
G6PC	NM_000151.3(G6PC):c.247C>T (p.Arg83Cys)	VAR_005239	11998	Glycogen storage disease type 1A|Glycogen storage disease, type I|not provided	Pathogenic(Last reviewed: Sep 19, 2016)	Disease	Y
G6PC	NM_000151.3(G6PC):c.809G>T (p.Gly270Val)	VAR_005250	21063	Glycogen storage disease type 1A	Pathogenic/Likely pathogenic(Last reviewed: Aug 25, 2016)	Disease	Y
GAA	NM_000152.4(GAA):c.1124G>T (p.Arg375Leu)	VAR_046469	283230	Glycogen storage disease, type II	Pathogenic/Likely pathogenic(Last reviewed: Sep 13, 2016)	Disease	Y
GAA	NM_000152.4(GAA):c.752C>T (p.Ser251Leu)	VAR_068578	325781	Glycogen storage disease, type II|not provided	Pathogenic/Likely pathogenic(Last reviewed: Jun 16, 2017)	Disease	Y
GAA	NM_000152.4(GAA):c.1933G>A (p.Asp645Asn)	VAR_004304	188728	Glycogen storage disease, type II|not provided	Pathogenic/Likely pathogenic(Last reviewed: Mar 07, 2017)	Disease	Y
GAA	NM_000152.4(GAA):c.655G>A (p.Gly219Arg)	VAR_018079	189065	Glycogen storage disease, type II|not provided	Pathogenic/Likely pathogenic(Last reviewed: Feb 28, 2017)	Disease	Y
GAA	NM_000152.4(GAA):c.1979G>A (p.Arg660His)	VAR_046477	189172	Glycogen storage disease, type II|not provided	Pathogenic/Likely pathogenic(Last reviewed: Jan 04, 2017)	Disease	Y
GAA	NM_000152.4(GAA):c.307T>G (p.Cys103Gly)	VAR_018078	92483	Glycogen storage disease, type II|not provided	Pathogenic(Last reviewed: Nov 09, 2016)	Disease	Y
GAA	NM_000152.4(GAA):c.761C>T (p.Ser254Leu)	VAR_068579	325782	Glycogen storage disease, type II|not provided	Pathogenic/Likely pathogenic(Last reviewed: Jun 16, 2017)	Disease	Y
GAA	NM_000152.4(GAA):c.2014C>T (p.Arg672Trp)	VAR_004308	188773	Glycogen storage disease, type II	Pathogenic/Likely pathogenic(Last reviewed: Jun 14, 2016)	Disease	Y
GAA	NM_000152.4(GAA):c.1064T>C (p.Leu355Pro)	VAR_018086	284093	Glycogen storage disease, type II	Pathogenic(Last reviewed: May 19, 2016)	Disease	Y
GAA	NM_000152.4(GAA):c.1655T>C (p.Leu552Pro)	VAR_018092	279811	Glycogen storage disease, type II|not provided	Pathogenic(Last reviewed: Jun 09, 2017)	Disease	Y
GAA	NM_000152.4(GAA):c.2238G>C (p.Trp746Cys)	VAR_004311	265160	Glycogen storage disease, type II|not provided|not specified	Pathogenic(Last reviewed: Jan 25, 2017)	Polymorphism	N
GAA	NM_000152.4(GAA):c.596A>G (p.His199Arg)	VAR_004286	92486	Glycogen storage disease, type II|not specified	Benign(Last reviewed: Jun 14, 2016)	Polymorphism	Y
GAA	NM_000152.4(GAA):c.668G>A (p.Arg223His)	VAR_004287	92488	Glycogen storage disease, type II|not specified	Benign/Likely benign(Last reviewed: Jun 14, 2016)	Polymorphism	Y
GAA	NM_000152.4(GAA):c.2338G>A (p.Val780Ile)	VAR_004313	92476	Glycogen storage disease, type II|not specified	Benign(Last reviewed: Jun 14, 2016)	Polymorphism	Y
GAA	NM_000152.4(GAA):c.271G>A (p.Asp91Asn)	VAR_004285	4020	Acid alpha-glucosidase, allele 2|not provided|not specified	Benign/Likely benign, other(Last reviewed: Dec 08, 2015)	Polymorphism	Y
GAA	NM_000152.4(GAA):c.1726G>A (p.Gly576Ser)	VAR_004300	92467	Glycogen storage disease, type II|not provided|not specified	Benign/Likely benign(Last reviewed: Nov 04, 2016)	Polymorphism	Y
GAA	NM_000152.4(GAA):c.2446G>A (p.Val816Ile)	VAR_004314	92477	Glycogen storage disease, type II|not specified	Benign/Likely benign(Last reviewed: Jun 14, 2016)	Polymorphism	Y
GAA	NM_000152.4(GAA):c.2780C>T (p.Thr927Ile)	VAR_004317	92482	Glycogen storage disease, type II|not specified	Benign/Likely benign(Last reviewed: Jun 14, 2016)	Polymorphism	Y
GAD1	NM_000817.2(GAD1):c.682A>C (p.Ile228Leu)	VAR_018861	332231	Cerebral palsy spastic quadriplegic|not provided	Uncertain significance(Last reviewed: Feb 03, 2017)	Polymorphism	N
GALC	NM_000153.3(GALC):c.1403C>G (p.Thr468Ser)	VAR_003396	92495	not provided|not specified	Benign/Likely benign(Last reviewed: Nov 30, 2016)	Disease	N
GALC	NM_000153.3(GALC):c.857G>A (p.Gly286Asp)	VAR_003390	30619	Galactosylceramide beta-galactosidase deficiency|not provided	Pathogenic/Likely pathogenic(Last reviewed: Apr 26, 2017)	Disease	Y
GALC	NM_000153.3(GALC):c.1592G>A (p.Arg531His)	VAR_013966	167119	Galactosylceramide beta-galactosidase deficiency|not provided	Pathogenic/Likely pathogenic(Last reviewed: Jul 21, 2016)	Disease	Y
GALC	NM_000153.3(GALC):c.1700A>C (p.Tyr567Ser)	VAR_003403	188969	Galactosylceramide beta-galactosidase deficiency	Pathogenic/Likely pathogenic(Last reviewed: Mar 16, 2016)	Disease	Y
GALC	NM_000153.3(GALC):c.61G>C (p.Ala21Pro)	VAR_064430	92508	Galactosylceramide beta-galactosidase deficiency|not specified	Benign/Likely benign(Last reviewed: Jun 14, 2016)	Polymorphism	Y
GALC	NM_000153.3(GALC):c.550C>T (p.Arg184Cys)	VAR_013960	92506	Galactosylceramide beta-galactosidase deficiency|not specified	Benign/Likely benign(Last reviewed: Jun 14, 2016)	Polymorphism	Y
GALC	NM_000153.3(GALC):c.742G>A (p.Asp248Asn)	VAR_003386	92509	Galactosylceramide beta-galactosidase deficiency|not specified	Benign/Likely benign(Last reviewed: Jun 14, 2016)	Polymorphism	Y
GALC	NM_000153.3(GALC):c.1685T>C (p.Ile562Thr)	VAR_003401	92497	Galactosylceramide beta-galactosidase deficiency|not specified	Benign(Last reviewed: Jun 14, 2016)	Polymorphism	Y
GALC	NM_000153.3(GALC):c.1921A>G (p.Thr641Ala)	VAR_003406	92500	Galactosylceramide beta-galactosidase deficiency|not specified	Benign(Last reviewed: Jun 14, 2016)	Polymorphism	Y
GALC	NM_000153.3(GALC):c.913A>G (p.Ile305Val)	VAR_013962	198993	Galactosylceramide beta-galactosidase deficiency|not specified	Benign/Likely benign(Last reviewed: Jun 14, 2016)	Polymorphism	Y
GALK1;ITGB4	NM_000213.4(ITGB4):c.5336T>C (p.Leu1779Pro)	VAR_027804	255543	Deficiency of galactokinase|Epidermolysis bullosa junctionalis with pyloric atresia|not specified	Benign(Last reviewed: Jun 14, 2016)	Polymorphism	Y
GALNS	NM_000512.4(GALNS):c.1156C>T (p.Arg386Cys)	VAR_007228	700	Mucopolysaccharidosis, MPS-IV-A|not provided	Pathogenic(Last reviewed: Apr 13, 2017)	Disease	Y
GALNS	NM_000512.4(GALNS):c.337A>T (p.Ile113Phe)	VAR_007185	703	Morquio syndrome|Mucopolysaccharidosis, MPS-IV-A	Pathogenic(Last reviewed: Jun 14, 2016)	Disease	Y
GALNS	NM_000512.4(GALNS):c.421T>A (p.Trp141Arg)	VAR_007190	197149	Morquio syndrome|Mucopolysaccharidosis, MPS-IV-A	Pathogenic/Likely pathogenic(Last reviewed: Jun 14, 2016)	Disease	Y
GALNS	NM_000512.4(GALNS):c.199C>A (p.Leu67Met)	VAR_007174	93172	Morquio syndrome|not specified	Benign(Last reviewed: Jun 14, 2016)	Polymorphism	Y
GALNS	NM_000512.4(GALNS):c.1177G>T (p.Ala393Ser)	VAR_007230	93165	Morquio syndrome|not specified	Benign/Likely benign(Last reviewed: Jun 14, 2016)	Polymorphism	Y
GALNS	NM_000512.4(GALNS):c.692C>G (p.Ala231Gly)	VAR_007205	93183	Morquio syndrome|not specified	Benign/Likely benign(Last reviewed: Jun 14, 2016)	Polymorphism	Y
GALNS	NM_000512.4(GALNS):c.599C>T (p.Thr200Met)	VAR_007202	198087	Morquio syndrome|not specified	Benign/Likely benign(Last reviewed: Jun 14, 2016)	Polymorphism	Y
GALNS	NM_000512.4(GALNS):c.1462G>A (p.Val488Met)	VAR_007238	194178	Morquio syndrome|not specified	Benign/Likely benign(Last reviewed: Jun 14, 2016)	Polymorphism	Y
GALT	NM_000155.3(GALT):c.404C>T (p.Ser135Leu)	VAR_002571	3618	Deficiency of UDPglucose-hexose-1-phosphate uridylyltransferase|not provided|not specified	Pathogenic(Last reviewed: May 18, 2017)	Disease	Y
GALT	NM_000155.3(GALT):c.442C>T (p.Arg148Trp)	VAR_002579	37359	Deficiency of UDPglucose-hexose-1-phosphate uridylyltransferase|not provided	Pathogenic(Last reviewed: Oct 27, 2016)	Disease	Y
GALT	NM_000155.3(GALT):c.425T>A (p.Met142Lys)	VAR_002574	3609	Deficiency of UDPglucose-hexose-1-phosphate uridylyltransferase|not provided	Pathogenic(Last reviewed: Mar 10, 2015)	Disease	Y
GALT	NM_000155.3(GALT):c.512T>C (p.Phe171Ser)	VAR_002583	3616	Deficiency of UDPglucose-hexose-1-phosphate uridylyltransferase	Pathogenic/Likely pathogenic(Last reviewed: Mar 09, 2016)	Disease	Y
GALT	NM_000155.3(GALT):c.584T>C (p.Leu195Pro)	VAR_002590	25222	Deficiency of UDPglucose-hexose-1-phosphate uridylyltransferase|not provided	Pathogenic(Last reviewed: Sep 18, 2015)	Disease	Y
GALT	NM_000155.3(GALT):c.626A>G (p.Tyr209Cys)	VAR_002596	25231	Deficiency of UDPglucose-hexose-1-phosphate uridylyltransferase|not provided	Pathogenic(Last reviewed: Sep 30, 2016)	Disease	Y
GALT	NM_000155.3(GALT):c.691C>T (p.Arg231Cys)	VAR_072797	25246	Deficiency of UDPglucose-hexose-1-phosphate uridylyltransferase|not provided	Pathogenic/Likely pathogenic(Last reviewed: Nov 29, 2016)	Disease	Y
GALT	NM_000155.3(GALT):c.855G>T (p.Lys285Asn)	VAR_002609	3621	Deficiency of UDPglucose-hexose-1-phosphate uridylyltransferase|not provided|not specified	Pathogenic(Last reviewed: Feb 14, 2017)	Disease	Y
GALT	NM_000155.3(GALT):c.997C>T (p.Arg333Trp)	VAR_002627	3610	Deficiency of UDPglucose-hexose-1-phosphate uridylyltransferase	Pathogenic/Likely pathogenic(Last reviewed: May 18, 2017)	Disease	Y
GALT	NM_000155.3(GALT):c.1030C>A (p.Gln344Lys)	VAR_002630	25320	Deficiency of UDPglucose-hexose-1-phosphate uridylyltransferase|not provided	Pathogenic/Likely pathogenic(Last reviewed: Dec 27, 2016)	Disease	Y
GALT	NM_000155.3(GALT):c.772C>T (p.Arg258Cys)	VAR_002605	92522	Deficiency of UDPglucose-hexose-1-phosphate uridylyltransferase|not provided	Pathogenic/Likely pathogenic(Last reviewed: Mar 15, 2016)	Disease	Y
GALT	NM_000155.3(GALT):c.563A>G (p.Gln188Arg)	VAR_002587	3614	Deficiency of UDPglucose-hexose-1-phosphate uridylyltransferase|not provided|not specified	Pathogenic(Last reviewed: May 18, 2017)	Disease	Y
GALT	NM_000155.3(GALT):c.775C>T (p.Arg259Trp)	VAR_002606	189191	Deficiency of UDPglucose-hexose-1-phosphate uridylyltransferase	Pathogenic/Likely pathogenic(Last reviewed: Jun 08, 2015)	Disease	Y
GAMT	NM_000156.5(GAMT):c.227C>T (p.Ser76Leu)	VAR_075292	195022	Cerebral creatine deficiency syndrome|not provided|not specified	Uncertain significance(Last reviewed: Mar 06, 2017)	Polymorphism	N
GAMT;NDUFS7	NM_000156.5(GAMT):c.626C>T (p.Thr209Met)	VAR_025723	21068	Deficiency of guanidinoacetate methyltransferase|Leigh syndrome|Mitochondrial complex I deficiency|not specified	Benign/Likely benign(Last reviewed: Jun 14, 2016)	Polymorphism	Y
GARS	NM_002047.3(GARS):c.124C>G (p.Pro42Ala)	VAR_054865	258532	Charcot-Marie-Tooth, Type 2|Distal spinal muscular atrophy|Peripheral axonal neuropathy|not specified	Benign(Last reviewed: Jun 14, 2016)	Polymorphism	Y
GARS	NM_002047.3(GARS):c.1163G>A (p.Arg388Gln)	VAR_054867	360012	Charcot-Marie-Tooth disease, type 2|Charcot-Marie-Tooth, Type 2|Distal spinal muscular atrophy|Peripheral axonal neuropathy|not provided|not specified	Benign/Likely benign(Last reviewed: Apr 05, 2017)	Polymorphism	Y
GARS	NM_002047.3(GARS):c.803C>T (p.Thr268Ile)	VAR_054866	188100	Charcot-Marie-Tooth disease, type 2|Charcot-Marie-Tooth, Type 2|Distal spinal muscular atrophy|Peripheral axonal neuropathy|not specified	Benign/Likely benign(Last reviewed: Apr 06, 2017)	Polymorphism	Y
GATA2	NM_001145661.1(GATA2):c.490G>A (p.Ala164Thr)	VAR_055004	134467	Lymphedema, primary, with myelodysplasia|not specified	Benign/Likely benign(Last reviewed: Jun 14, 2016)	Polymorphism	Y
GATA6	NM_005257.5(GATA6):c.43G>C (p.Gly15Arg)	VAR_067380	129134	Atrioventricular septal defect 5|Monogenic diabetes|not specified	Benign/Likely benign(Last reviewed: Jan 21, 2017)	Polymorphism	Y
GATAD1	NM_021167.4(GATAD1):c.160G>A (p.Gly54Ser)	VAR_032533	45825	not specified	Benign(Last reviewed: Apr 10, 2015)	Polymorphism	Y
GATAD1	NM_021167.4(GATAD1):c.697C>T (p.Arg233Trp)	VAR_068557	45829	Cardiomyopathy, dilated, 2b|not specified	Benign(Last reviewed: Jan 25, 2017)	Polymorphism	Y
GATM	NM_001482.2(GATM):c.330A>T (p.Gln110His)	VAR_020305	129138	Arginine:glycine amidinotransferase deficiency|not specified	Benign/Likely benign(Last reviewed: Jun 14, 2016)	Polymorphism	Y
GBA	NM_000157.3(GBA):c.1342G>C (p.Asp448His)	VAR_003313	4293	Acute neuronopathic Gaucher's disease|Acute neuronopathic Gaucher's disease|Gaucher disease|Gaucher disease type 3C|Gaucher disease, perinatal lethal|Gaucher's disease, type 1|Subacute neuronopathic Gaucher's disease|Subacute neuronopathic Gaucher's disease|not provided	Pathogenic(Last reviewed: Aug 29, 2016)	Disease	Y
GBA	NM_000157.3(GBA):c.1448T>C (p.Leu483Pro)	VAR_003321	4288	Acute neuronopathic Gaucher's disease|Acute neuronopathic Gaucher's disease|Dementia, Lewy body, susceptibility to|Gaucher disease|Gaucher disease, perinatal lethal|Gaucher's disease, type 1|Gaucher's disease, type 1|Gaucher's disease, type 1|Gaucher's disease, type 1|Parkinson disease, late-onset|Subacute neuronopathic Gaucher's disease|Subacute neuronopathic Gaucher's disease|not provided	Pathogenic, risk factor(Last reviewed: Sep 23, 2016)	Disease	Y
GBA	NM_000157.3(GBA):c.1448T>C (p.Leu483Pro)	VAR_003321	4288	Acute neuronopathic Gaucher's disease|Acute neuronopathic Gaucher's disease|Dementia, Lewy body, susceptibility to|Gaucher disease|Gaucher disease, perinatal lethal|Gaucher's disease, type 1|Gaucher's disease, type 1|Gaucher's disease, type 1|Gaucher's disease, type 1|Parkinson disease, late-onset|Subacute neuronopathic Gaucher's disease|Subacute neuronopathic Gaucher's disease|not provided	Pathogenic, risk factor(Last reviewed: Sep 23, 2016)	Disease	Y
GBA	NM_000157.3(GBA):c.1604G>A (p.Arg535His)	VAR_003328	4311	Gaucher disease|Gaucher's disease, type 1|not provided	Pathogenic(Last reviewed: Feb 09, 2016)	Disease	Y
GBA	NM_001005741.2(GBA):c.1226A>G (p.Asn409Ser)	VAR_003302	4290	Acute neuronopathic Gaucher's disease|Akinesia|Dementia, Lewy body, susceptibility to|Gaucher disease|Gaucher disease type 3C|Gaucher disease, perinatal lethal|Gaucher's disease, type 1|Gaucher's disease, type 1|Lewy body dementia|Parkinson disease, late-onset|Parkinson disease, late-onset|Rigidity|Subacute neuronopathic Gaucher's disease|Susceptibility to Parkinson's Disease|not provided	Pathogenic/Likely pathogenic, risk factor(Last reviewed: May 18, 2017)	Disease	Y
GBA	NM_000157.3(GBA):c.887G>A (p.Arg296Gln)	VAR_003284	4328	Gaucher disease|Gaucher disease, perinatal lethal|Gaucher's disease, type 1|not provided	Pathogenic(Last reviewed: May 06, 2016)	Disease	Y
GBA	NM_000157.3(GBA):c.1504C>T (p.Arg502Cys)	VAR_003324	4295	Acute neuronopathic Gaucher's disease|Gaucher disease|Gaucher's disease, type 1|Parkinson disease, late-onset|Subacute neuronopathic Gaucher's disease|not provided	Pathogenic, risk factor(Last reviewed: Sep 14, 2016)	Disease	Y
GBE1	NM_000158.3(GBE1):c.986A>C (p.Tyr329Ser)	VAR_022431	2777	Adult polyglucosan body neuropathy|GBE1-Related Disorders|Glycogen storage disease IV, nonprogressive hepatic|Glycogen storage disease, type IV|not provided	Pathogenic(Last reviewed: Apr 26, 2017)	Disease	Y
GBE1	NM_000158.3(GBE1):c.1519A>G (p.Thr507Ala)	VAR_034749	255383	Glycogen storage disease, type IV|Polyglucosan body disease, adult|not specified	Benign/Likely benign(Last reviewed: Jun 14, 2016)	Polymorphism	Y
GBE1	NM_000158.3(GBE1):c.568A>G (p.Arg190Gly)	VAR_022109	197636	Glycogen storage disease, type IV|Polyglucosan body disease, adult|not specified	Benign(Last reviewed: Jun 14, 2016)	Polymorphism	Y
GCDH	NM_000159.3(GCDH):c.1262C>T (p.Ala421Val)	VAR_000420	2082	Glutaric acidemia|Glutaric aciduria, type 1|not provided	Pathogenic(Last reviewed: Sep 16, 2016)	Disease	Y
GCDH	NM_000159.3(GCDH):c.1204C>T (p.Arg402Trp)	VAR_000412	2085	Glutaric acidemia|Glutaric aciduria, type 1|not provided	Pathogenic/Likely pathogenic(Last reviewed: Sep 16, 2016)	Disease	Y
GCDH	NM_000159.3(GCDH):c.1198G>A (p.Val400Met)	VAR_000411	2088	Glutaric aciduria, type 1|not provided	Pathogenic(Last reviewed: Oct 05, 2017)	Disease	Y
GCDH	NM_000159.3(GCDH):c.680G>C (p.Arg227Pro)	VAR_000380	2089	Glutaric acidemia|Glutaric aciduria, type 1|not provided	Pathogenic/Likely pathogenic(Last reviewed: Sep 20, 2016)	Disease	Y
GCDH	NM_000159.3(GCDH):c.416C>T (p.Ser139Leu)	VAR_000373	188921	Glutaric aciduria, type 1|not provided	Pathogenic/Likely pathogenic(Last reviewed: Apr 14, 2015)	Disease	Y
GCDH	NM_000159.3(GCDH):c.262C>T (p.Arg88Cys)	VAR_000366	189150	Glutaric aciduria, type 1|not provided	Pathogenic/Likely pathogenic(Last reviewed: Nov 12, 2015)	Disease	Y
GCDH	NM_000159.3(GCDH):c.1168G>C (p.Gly390Arg)	VAR_000408	193799	Glutaric aciduria, type 1|not provided	Pathogenic(Last reviewed: Jan 26, 2017)	Disease	Y
GCDH	NM_000159.3(GCDH):c.769C>T (p.Arg257Trp)	VAR_000383	188872	Glutaric aciduria, type 1|not provided	Likely pathogenic(Last reviewed: Jan 23, 2017)	Disease	Y
GCDH	NM_000159.3(GCDH):c.482G>A (p.Arg161Gln)	VAR_000375	188789	Glutaric aciduria, type 1	Pathogenic/Likely pathogenic(Last reviewed: Feb 09, 2016)	Disease	Y
GCK	NM_000162.3(GCK):c.676G>A (p.Val226Met)	VAR_003703	36243	Maturity-onset diabetes of the young, type 2|not provided	Pathogenic(Last reviewed: Aug 09, 2016)	Disease	Y
GCK	NM_000162.3(GCK):c.449T>C (p.Phe150Ser)	VAR_010588	36218	Maturity-onset diabetes of the young, type 2|not provided	Pathogenic/Likely pathogenic(Last reviewed: Apr 22, 2015)	Disease	Y
GCK	NM_000162.3(GCK):c.544G>A (p.Val182Met)	VAR_003699	129144	Diabetes mellitus type 2|Diabetes mellitus, gestational|Maturity-onset diabetes of the young, type 2|not provided	Pathogenic(Last reviewed: Nov 25, 2015)	Disease	Y
GCK	NM_000162.3(GCK):c.106C>T (p.Arg36Trp)	VAR_010584	431973	Maturity-onset diabetes of the young, type 2|not provided	Pathogenic/Likely pathogenic(Last reviewed: Jun 21, 2017)	Disease	Y
GCK	NM_000162.4(GCK):c.31G>A (p.Ala11Thr)	VAR_010583	129141	Monogenic diabetes|not provided|not specified	Benign/Likely benign(Last reviewed: Mar 17, 2017)	Polymorphism	Y
GDAP1	NM_018972.2(GDAP1):c.358C>T (p.Arg120Trp)	VAR_078266	4198	Charcot-Marie-Tooth disease|Charcot-Marie-Tooth disease type 2K|Charcot-Marie-Tooth disease, type 4A|not provided	Pathogenic(Last reviewed: Apr 13, 2017)	Disease	Y
GDF1	NM_001492.5(GDF1):c.353C>T (p.Ala118Val)	VAR_028274	258160	not specified	Benign(Last reviewed: Mar 28, 2016)	Polymorphism	Y
GFAP	NM_002055.4(GFAP):c.716G>A (p.Arg239His)	VAR_017472	16168	Alexander's disease|not provided	Pathogenic(Last reviewed: May 16, 2017)	Disease	Y
GFAP	NM_002055.4(GFAP):c.140C>T (p.Pro47Leu)	VAR_017464	66457	Alexander's disease|Inborn genetic diseases|not provided	Likely benign(Last reviewed: Dec 29, 2016)	Polymorphism	Y
GFI1	NM_005263.3(GFI1):c.107G>A (p.Ser36Asn)	VAR_052722	259699	Severe congenital neutropenia|not specified	Benign(Last reviewed: Jun 14, 2016)	Polymorphism	Y
GH1	NM_000515.4(GH1):c.406G>A (p.Val136Ile)	VAR_011919	197151	not provided|not specified	Benign/Likely benign(Last reviewed: Jan 06, 2017)	Polymorphism	Y
GHR	NM_000163.4(GHR):c.1319G>T (p.Cys440Phe)	VAR_013939	281095	Laron-type isolated somatotropin defect|not specified	Benign/Likely benign(Last reviewed: Jul 14, 2016)	Disease	N
GHR	NM_000163.4(GHR):c.1630A>C (p.Ile544Leu)	VAR_013941	8658	Familial hypercholesterolemia|Laron-type isolated somatotropin defect|not specified	Benign, risk factor(Last reviewed: Jun 14, 2016)	Polymorphism	Y
GHR	NM_000163.4(GHR):c.1735C>A (p.Pro579Thr)	VAR_013942	281096	Laron-type isolated somatotropin defect|not specified	Benign/Likely benign(Last reviewed: Jul 14, 2016)	Polymorphism	Y
GHRHR	NM_000823.3(GHRHR):c.169G>A (p.Ala57Thr)	VAR_033962	36273	Idiopathic growth hormone deficiency|Isolated Growth Hormone Deficiency|not specified	Benign/Likely benign(Last reviewed: Jun 14, 2016)	Polymorphism	Y
GHRHR	NM_000823.3(GHRHR):c.363G>T (p.Glu121Asp)	VAR_033963	36274	Idiopathic growth hormone deficiency|Isolated Growth Hormone Deficiency	Benign/Likely benign(Last reviewed: Jun 14, 2016)	Polymorphism	Y
GJA1	NM_000165.4(GJA1):c.226C>A (p.Arg76Ser)	VAR_015755	16997	Oculodentodigital dysplasia|not provided	Pathogenic/Likely pathogenic(Last reviewed: May 12, 2016)	Disease	Y
GJA1	NM_000165.4(GJA1):c.758C>T (p.Ala253Val)	VAR_015764	137483	Oculodentodigital dysplasia|Oculodentodigital dysplasia, autosomal recessive|not specified	Benign/Likely benign(Last reviewed: Jun 14, 2016)	Polymorphism	Y
GJA3	NM_021954.3(GJA3):c.895C>A (p.Leu299Met)	VAR_022426	261459	Zonular Pulverulent Cataract|not specified	Benign(Last reviewed: Jun 14, 2016)	Polymorphism	Y
GJB1	NM_000166.5(GJB1):c.424C>T (p.Arg142Trp)	VAR_002086	10431	Charcot-Marie-Tooth Neuropathy X|X-linked hereditary motor and sensory neuropathy|not provided	Pathogenic(Last reviewed: Jul 18, 2016)	Disease	Y
GJB1	NM_000166.5(GJB1):c.467T>G (p.Leu156Arg)	VAR_002090	10437	Charcot-Marie-Tooth Neuropathy X|X-linked hereditary motor and sensory neuropathy|not provided	Pathogenic/Likely pathogenic(Last reviewed: Feb 23, 2017)	Disease	Y
GJB1	NM_000166.5(GJB1):c.283G>A (p.Val95Met)	VAR_002072	10441	Charcot-Marie-Tooth Neuropathy X|X-linked hereditary motor and sensory neuropathy|not provided	Pathogenic(Last reviewed: Dec 28, 2016)	Disease	Y
GJB1	NM_000166.5(GJB1):c.43C>T (p.Arg15Trp)	VAR_002016	21084	Charcot-Marie-Tooth Neuropathy X|X-linked hereditary motor and sensory neuropathy|not provided	Pathogenic(Last reviewed: Jul 12, 2016)	Disease	Y
GJB1	NM_000166.5(GJB1):c.490C>T (p.Arg164Trp)	VAR_002099	217170	X-linked hereditary motor and sensory neuropathy|not provided	Pathogenic(Last reviewed: Jul 29, 2016)	Disease	Y
GJB1	NM_000166.5(GJB1):c.77C>T (p.Ser26Leu)	VAR_002025	155726	Charcot-Marie-Tooth Neuropathy X|X-linked hereditary motor and sensory neuropathy|not provided	Pathogenic(Last reviewed: Dec 30, 2016)	Disease	Y
GJB1	NM_000166.5(GJB1):c.271G>A (p.Val91Met)	VAR_029916	195025	Charcot-Marie-Tooth Neuropathy X|X-linked hereditary motor and sensory neuropathy	Likely pathogenic(Last reviewed: Aug 18, 2016)	Disease	Y
GJB1	NM_000166.5(GJB1):c.305A>G (p.Glu102Gly)	VAR_002074	216038	Charcot-Marie-Tooth Neuropathy X|not provided	Pathogenic(Last reviewed: Apr 28, 2017)	Disease	Y
GJB1	NM_000166.5(GJB1):c.547C>T (p.Arg183Cys)	VAR_002109	216039	Charcot-Marie-Tooth Neuropathy X|not provided	Pathogenic(Last reviewed: Apr 15, 2016)	Disease	Y
GJB1	NM_000166.5(GJB1):c.44G>A (p.Arg15Gln)	VAR_002015	217169	Charcot-Marie-Tooth Neuropathy X|X-linked hereditary motor and sensory neuropathy|not provided	Pathogenic(Last reviewed: Mar 05, 2016)	Disease	Y
GJB1	NM_000166.5(GJB1):c.208C>G (p.Pro70Ala)	VAR_029914	237122	Charcot-Marie-Tooth Neuropathy X|not provided	Likely pathogenic(Last reviewed: Aug 01, 2016)	Disease	Y
GJB1	NM_000166.5(GJB1):c.239A>G (p.Gln80Arg)	VAR_002055	246096	Charcot-Marie-Tooth Neuropathy X|not provided	Likely pathogenic(Last reviewed: Jul 18, 2016)	Disease	Y
GJB2	NM_004004.5(GJB2):c.229T>C (p.Trp77Arg)	VAR_002141	17003	Deafness, autosomal dominant 3a|Deafness, autosomal recessive 1A|Nonsyndromic hearing loss and deafness|not provided	Pathogenic(Last reviewed: Sep 19, 2016)	Disease	Y
GJB2	NM_004004.5(GJB2):c.428G>A (p.Arg143Gln)	VAR_015940	17017	Deafness, autosomal dominant 3a|Deafness, autosomal recessive 1A|not provided	Pathogenic/Likely pathogenic(Last reviewed: Feb 16, 2017)	Disease	Y
GJB2	NM_004004.5(GJB2):c.250G>T (p.Val84Leu)	VAR_002143	167134	Deafness, autosomal recessive 1A|not provided|not specified	Pathogenic/Likely pathogenic(Last reviewed: Dec 06, 2016)	Disease	Y
GJB2	NM_004004.5(GJB2):c.250G>C (p.Val84Leu)	VAR_002143	17032	Deafness, autosomal recessive 1A|Hearing impairment|Nonsyndromic hearing loss and deafness	Pathogenic(Last reviewed: May 09, 2017)	Disease	Y
GJB2	NM_004004.5(GJB2):c.250G>A (p.Val84Met)	VAR_060800	17036	Deafness, autosomal dominant 3a|Deafness, autosomal recessive 1A|Nonsyndromic hearing loss and deafness|not provided	Pathogenic(Last reviewed: Jun 08, 2016)	Disease	Y
GJB2	NM_004004.5(GJB2):c.95G>A (p.Arg32His)	VAR_023605	44766	Deafness, autosomal dominant 3a|Deafness, autosomal recessive 1A|Nonsyndromic hearing loss and deafness	Pathogenic(Last reviewed: Aug 03, 2016)	Disease	Y
GJB2	NM_004004.5(GJB2):c.283G>A (p.Val95Met)	VAR_002144	44735	Deafness, X-linked 2|Deafness, autosomal dominant 3a|Deafness, autosomal recessive 1A|Deafness, autosomal recessive 1A|Hearing impairment|Hystrix-like ichthyosis with deafness|Keratitis-ichthyosis-deafness syndrome, autosomal dominant|Keratoderma palmoplantar deafness|Knuckle pads, deafness AND leukonychia syndrome|Mutilating keratoderma|Nonsyndromic hearing loss and deafness|not specified	Pathogenic/Likely pathogenic(Last reviewed: May 18, 2017)	Disease	Y
GJB2	NM_004004.5(GJB2):c.224G>A (p.Arg75Gln)	VAR_015936	17027	Deafness, autosomal dominant 3a|Deafness, autosomal recessive 1A|Keratoderma palmoplantar deafness|Nonsyndromic hearing loss and deafness|not provided	Pathogenic(Last reviewed: Dec 22, 2016)	Disease	Y
GJB2	NM_004004.5(GJB2):c.148G>A (p.Asp50Asn)	VAR_015456	17020	Deafness, autosomal recessive 1A|Hystrix-like ichthyosis with deafness|Keratitis-ichthyosis-deafness syndrome, autosomal dominant|not provided	Pathogenic(Last reviewed: Jun 16, 2015)	Disease	Y
GJB2	NM_004004.5(GJB2):c.148G>A (p.Asp50Asn)	VAR_015456	17020	Deafness, autosomal recessive 1A|Hystrix-like ichthyosis with deafness|Keratitis-ichthyosis-deafness syndrome, autosomal dominant|not provided	Pathogenic(Last reviewed: Jun 16, 2015)	Disease	Y
GJB2	NM_004004.5(GJB2):c.269T>C (p.Leu90Pro)	VAR_015937	17016	Deafness, X-linked 2|Deafness, autosomal dominant 3a|Deafness, autosomal dominant 3a|Deafness, autosomal recessive 1A|Deafness, autosomal recessive 1A|Hearing impairment|Hearing impairment|Horseshoe kidney|Hystrix-like ichthyosis with deafness|Keratitis-ichthyosis-deafness syndrome, autosomal dominant|Keratoderma palmoplantar deafness|Knuckle pads, deafness AND leukonychia syndrome|Mutilating ker…	Pathogenic(Last reviewed: May 18, 2017)	Disease	Y
GJB2	NM_004004.5(GJB2):c.427C>T (p.Arg143Trp)	VAR_015460	17009	Deafness, X-linked 2|Deafness, autosomal dominant 3a|Deafness, autosomal recessive 1A|Deafness, autosomal recessive 1A|Hearing impairment|Hystrix-like ichthyosis with deafness|Keratitis-ichthyosis-deafness syndrome, autosomal dominant|Keratoderma palmoplantar deafness|Knuckle pads, deafness AND leukonychia syndrome|Mutilating keratoderma|Nonsyndromic hearing loss and deafness|not provided	Pathogenic(Last reviewed: May 18, 2017)	Disease	Y
GJB2	NM_004004.5(GJB2):c.551G>A (p.Arg184Gln)	VAR_023614	29662	Deafness, autosomal dominant 3a|Hearing impairment|not provided	Pathogenic(Last reviewed: May 09, 2017)	Disease	Y
GJB2	NM_004004.5(GJB2):c.551G>C (p.Arg184Pro)	VAR_015943	17007	Deafness, autosomal recessive 1A|Nonsyndromic hearing loss and deafness	Pathogenic/Likely pathogenic(Last reviewed: May 09, 2017)	Disease	Y
GJB2	NM_004004.5(GJB2):c.457G>A (p.Val153Ile)	VAR_009967	44754	Deafness, autosomal recessive 1A|Nonsyndromic Hearing Loss, Dominant|not specified	Benign/Likely benign(Last reviewed: May 09, 2017)	Polymorphism	Y
GJB2	NM_004004.5(GJB2):c.368C>A (p.Thr123Asn)	VAR_015459	44743	Hystrix-like ichthyosis with deafness|Keratitis-Ichthyosis-Deafness Syndrome|Mutilating keratoderma|Nonsyndromic Hearing Loss, Dominant|Nonsyndromic Hearing Loss, Recessive|not specified	Benign/Likely benign(Last reviewed: Jun 14, 2016)	Polymorphism	Y
GJB2	NM_004004.5(GJB2):c.380G>A (p.Arg127His)	VAR_015939	44745	Deafness, autosomal recessive 1A|Nonsyndromic Hearing Loss, Dominant|not specified	Benign/Likely benign(Last reviewed: May 09, 2017)	Polymorphism	Y
GJB2	NM_004004.5(GJB2):c.249C>G (p.Phe83Leu)	VAR_002142	44732	Deafness, autosomal recessive 1A|Hystrix-like ichthyosis with deafness|Keratitis-Ichthyosis-Deafness Syndrome|Mutilating keratoderma|Nonsyndromic Hearing Loss, Dominant|Nonsyndromic Hearing Loss, Recessive|not specified	Benign/Likely benign(Last reviewed: May 09, 2017)	Polymorphism	Y
GJB2	NM_004004.5(GJB2):c.608T>C (p.Ile203Thr)	VAR_009970	44762	Deafness, autosomal recessive 1A|Nonsyndromic Hearing Loss, Recessive|not specified	Benign(Last reviewed: May 09, 2017)	Polymorphism	Y
GJB3	NM_024009.2(GJB3):c.94C>T (p.Arg32Trp)	VAR_011978	46088	Nonsyndromic Hearing Loss, Dominant|not specified	Benign/Likely benign(Last reviewed: Jun 14, 2016)	Polymorphism	Y
GJB3	NM_024009.2(GJB3):c.598G>A (p.Val200Ile)	VAR_022423	163535	Erythrokeratodermia variabilis|Nonsyndromic Hearing Loss, Dominant|not specified	Benign(Last reviewed: Jun 14, 2016)	Polymorphism	Y
GJB6	NM_006783.4(GJB6):c.31G>A (p.Gly11Arg)	VAR_015696	5544	Hidrotic ectodermal dysplasia syndrome|Nonsyndromic hearing loss and deafness|not provided	Pathogenic(Last reviewed: Aug 03, 2016)	Disease	Y
GJB6	NM_006783.4(GJB6):c.595T>A (p.Ser199Thr)	VAR_022425	45504	not specified	Benign/Likely benign(Last reviewed: Mar 20, 2015)	Polymorphism	Y
GJB6	NM_006783.4(GJB6):c.476A>G (p.Asn159Ser)	VAR_048825	45502	not specified	Benign/Likely benign(Last reviewed: Jun 07, 2016)	Polymorphism	Y
GLA	NM_000169.2(GLA):c.902G>A (p.Arg301Gln)	VAR_000481	10715	Cardiovascular phenotype|Fabry disease|Fabry disease, cardiac variant	Pathogenic(Last reviewed: Nov 28, 2016)	Disease	Y
GLA	NM_000169.2(GLA):c.334C>T (p.Arg112Cys)	VAR_000447	10723	Fabry disease|Fabry disease|not provided	Pathogenic(Last reviewed: Mar 09, 2017)	Disease	Y
GLA	NM_000169.2(GLA):c.427G>C (p.Ala143Pro)	VAR_000453	10769	Fabry disease|not provided	Pathogenic/Likely pathogenic(Last reviewed: Apr 23, 2016)	Disease	Y
GLA	NM_000169.2(GLA):c.644A>G (p.Asn215Ser)	VAR_000464	10730	Fabry disease|not provided	Pathogenic(Last reviewed: May 18, 2017)	Disease	Y
GLA	NM_000169.2(GLA):c.613C>A (p.Pro205Thr)	VAR_000463	42456	Fabry disease	Pathogenic/Likely pathogenic(Last reviewed: Mar 08, 2016)	Disease	Y
GLA	NM_000169.2(GLA):c.1118G>A (p.Gly373Asp)	VAR_012436	222145	Fabry disease|not provided	Pathogenic(Last reviewed: Dec 14, 2016)	Disease	Y
GLA	NM_000169.2(GLA):c.865A>G (p.Ile289Val)	VAR_077405	217400	Deoxygalactonojirimycin response|Fabry disease|not specified	Uncertain significance, drug response(Last reviewed: May 15, 2017)	Polymorphism	N
GLB1	NM_000404.3(GLB1):c.29C>T (p.Pro10Leu)	VAR_008671	92904	GM1 gangliosidosis|Morquio syndrome|not specified	Benign/Likely benign(Last reviewed: Jun 14, 2016)	Disease	N
GLB1	NM_000404.3(GLB1):c.325C>T (p.Arg109Trp)	VAR_053875	129154	GM1 gangliosidosis|Morquio syndrome|not specified	Benign/Likely benign(Last reviewed: Jun 14, 2016)	Polymorphism	Y
GLE1	NM_001003722.1(GLE1):c.727A>G (p.Ile243Val)	VAR_024057	198109	Lethal Congenital Contracture Syndrome|Lethal arthrogryposis with anterior horn cell disease|not specified	Benign(Last reviewed: Jun 14, 2016)	Polymorphism	Y
GLI2	NM_005270.4(GLI2):c.3916G>A (p.Asp1306Asn)	VAR_047307	95272	Holoprosencephaly|not specified	Benign(Last reviewed: Dec 29, 2016)	Polymorphism	Y
GLI2	NM_005270.4(GLI2):c.4332G>A (p.Met1444Ile)	VAR_032977	194230	Holoprosencephaly|not provided|not specified	Benign/Likely benign(Last reviewed: Oct 13, 2016)	Polymorphism	Y
GLI2	NM_005270.4(GLI2):c.3466G>T (p.Ala1156Ser)	VAR_047306	95271	Holoprosencephaly|not specified	Benign(Last reviewed: Jun 14, 2016)	Polymorphism	Y
GLI2	NM_005270.4(GLI2):c.4054A>G (p.Met1352Val)	VAR_075215	194231	Holoprosencephaly|not specified	Benign/Likely benign(Last reviewed: Jun 14, 2016)	Unclassified	N
GLI3	NM_000168.5(GLI3):c.2424A>G (p.Ile808Met)	VAR_010056	235210	Greig cephalopolysyndactyly syndrome|not provided|not specified	Likely benign(Last reviewed: Apr 26, 2017)	Disease	N
GLI3	NM_000168.5(GLI3):c.4007G>A (p.Gly1336Glu)	VAR_034865	255440	Greig cephalopolysyndactyly syndrome|Pallister-Hall syndrome|Polydactyly|not specified	Benign/Likely benign(Last reviewed: Jun 14, 2016)	Polymorphism	Y
GLI3	NM_000168.5(GLI3):c.4609C>T (p.Arg1537Cys)	VAR_010057	255443	Greig cephalopolysyndactyly syndrome|Pallister-Hall syndrome|Polydactyly|not specified	Benign/Likely benign(Last reviewed: Jun 14, 2016)	Polymorphism	Y
GLI3	NM_000168.5(GLI3):c.547A>G (p.Thr183Ala)	VAR_028276	255446	Greig cephalopolysyndactyly syndrome|Pallister-Hall syndrome|Polydactyly|not specified	Benign(Last reviewed: Jan 27, 2017)	Polymorphism	Y
GLI3	NM_000168.5(GLI3):c.2993C>T (p.Pro998Leu)	VAR_028278	255433	Greig cephalopolysyndactyly syndrome|Pallister-Hall syndrome|Polydactyly|not specified	Benign(Last reviewed: Jun 14, 2016)	Polymorphism	Y
GLIS2	NM_032575.2(GLIS2):c.1474A>G (p.Thr492Ala)	VAR_032256	167149	Nephronophthisis|not specified	Benign/Likely benign(Last reviewed: Jun 14, 2016)	Polymorphism	Y
GLIS3	NM_152629.3(GLIS3):c.902C>A (p.Pro301Gln)	VAR_031062	129160	Diabetes mellitus, neonatal, with congenital hypothyroidism|not specified	Benign/Likely benign(Last reviewed: Jun 14, 2016)	Polymorphism	Y
GLIS3	NM_152629.3(GLIS3):c.805T>C (p.Ser269Pro)	VAR_047148	129159	Diabetes mellitus, neonatal, with congenital hypothyroidism|not specified	Benign/Likely benign(Last reviewed: Jun 14, 2016)	Polymorphism	Y
GLUD1	NM_005271.4(GLUD1):c.1493C>T (p.Ser498Leu)	VAR_008666	16122	Hyperinsulinism-hyperammonemia syndrome|not provided	Pathogenic(Last reviewed: Aug 14, 2014)	Disease	Y
GM2A	NM_000405.4(GM2A):c.55G>A (p.Ala19Thr)	VAR_013830	256030	Tay-Sachs disease, variant AB|not specified	Benign/Likely benign(Last reviewed: Jun 14, 2016)	Polymorphism	Y
GM2A	NM_000405.4(GM2A):c.175A>G (p.Ile59Val)	VAR_036892	167150	Tay-Sachs disease, variant AB|not specified	Benign(Last reviewed: Jun 14, 2016)	Polymorphism	Y
GM2A	NM_000405.4(GM2A):c.205A>G (p.Met69Val)	VAR_036893	167151	Tay-Sachs disease, variant AB|not specified	Benign(Last reviewed: Jun 14, 2016)	Polymorphism	Y
GMPPB	NM_021971.2(GMPPB):c.553C>T (p.Arg185Cys)	VAR_070145	60543	Muscular dystrophy-dystroglycanopathy|Muscular dystrophy-dystroglycanopathy (congenital with brain and eye anomalies), type a, 14|Muscular dystrophy-dystroglycanopathy (congenital with mental retardation), type b, 14|Muscular dystrophy-dystroglycanopathy (congenital with mental retardation), type b, 14|Muscular dystrophy-dystroglycanopathy (limb-girdle), type c, 14|Muscular dystrophy-dystroglycan…	Pathogenic/Likely pathogenic(Last reviewed: May 23, 2017)	Disease	Y
GMPPB	NM_013334.3(GMPPB):c.95C>T (p.Pro32Leu)	VAR_070144	60544	Muscular dystrophy-dystroglycanopathy (congenital with mental retardation), type b, 14|Muscular dystrophy-dystroglycanopathy (limb-girdle), type c, 14|not provided	Pathogenic(Last reviewed: May 04, 2017)	Disease	Y
GMPPB	NM_013334.3(GMPPB):c.376C>G (p.His126Asp)	VAR_035372	260285	not specified	Benign(Last reviewed: Jan 15, 2016)	Polymorphism	Y
GNAO1	NM_020988.2(GNAO1):c.607G>A (p.Gly203Arg)	VAR_070866	66115	Early infantile epileptic encephalopathy|Early infantile epileptic encephalopathy 17|not provided	Pathogenic(Last reviewed: Apr 07, 2017)	Disease	Y
GNAO1	NM_020988.2(GNAO1):c.736G>A (p.Glu246Lys)	VAR_077339	208777	Inborn genetic diseases|Neurodevelopmental disorder with involuntary movements|not provided	Pathogenic(Last reviewed: Jun 02, 2017)	Disease	Y
GNAO1	NM_020988.2(GNAO1):c.680C>T (p.Ala227Val)	VAR_077338	211088	Early infantile epileptic encephalopathy 17|not provided	Pathogenic/Likely pathogenic(Last reviewed: Jun 02, 2016)	Disease	Y
GNAT2	NM_005272.3(GNAT2):c.319C>A (p.Leu107Ile)	VAR_047623	259743	Achromatopsia|not specified	Benign/Likely benign(Last reviewed: Jun 14, 2016)	Polymorphism	Y
GNE	NM_005476.5(GNE):c.2086G>A (p.Val696Met)	VAR_017965	6028	Inclusion body myopathy 2|Nonaka myopathy|Nonaka myopathy|Nonaka myopathy|Sialuria|Sialuria|not provided	Pathogenic/Likely pathogenic(Last reviewed: Jul 06, 2017)	Disease	Y
GNE	NM_005476.5(GNE):c.1714G>C (p.Val572Leu)	VAR_017959	6033	Inclusion body myopathy 2|Nonaka myopathy|Sialuria	Pathogenic(Last reviewed: Feb 23, 2016)	Disease	Y
GNE	NM_005476.5(GNE):c.527A>T (p.Asp176Val)	VAR_021775	41233	Inclusion body myopathy 2|Nonaka myopathy	Pathogenic/Likely pathogenic(Last reviewed: Jun 14, 2016)	Disease	Y
GNE	NM_005476.5(GNE):c.1760T>C (p.Ile587Thr)	VAR_017961	188882	Inclusion body myopathy 2|Nonaka myopathy	Pathogenic/Likely pathogenic(Last reviewed: Jun 01, 2016)	Disease	Y
GNRHR	NM_000406.2(GNRHR):c.317A>G (p.Gln106Arg)	VAR_019313	16023	Hypogonadotropic hypogonadism 7 with or without anosmia|not provided	Pathogenic(Last reviewed: May 25, 2017)	Disease	Y
GNRHR	NM_000406.2(GNRHR):c.416G>A (p.Arg139His)	VAR_019315	16030	Hypogonadotropic hypogonadism 7 with or without anosmia|Hypogonadotropic hypogonadism 7 with or without anosmia|Isolated GnRH Deficiency|not provided	Pathogenic(Last reviewed: Jun 21, 2017)	Disease	Y
GORAB	NM_152281.2(GORAB):c.958G>A (p.Glu320Lys)	VAR_027867	262629	Geroderma osteodysplastica|not specified	Benign(Last reviewed: Jun 14, 2016)	Polymorphism	Y
GOSR2	NM_004287.4(GOSR2):c.200G>A (p.Arg67Lys)	VAR_024471	129165	Progressive myoclonic epilepsy|not specified	Benign/Likely benign(Last reviewed: Jun 14, 2016)	Polymorphism	Y
GP9	NM_000174.4(GP9):c.466G>A (p.Ala156Thr)	VAR_025009	196227	Bernard Soulier syndrome|not specified	Benign(Last reviewed: Jun 14, 2016)	Disease	N
GPC3	NM_004484.3(GPC3):c.1285G>A (p.Val429Met)	VAR_069139	134501	Wilms tumor 1|not provided|not specified	Benign/Likely benign(Last reviewed: Mar 09, 2017)	Polymorphism	Y
GPD1L	NM_015141.3(GPD1L):c.839C>T (p.Ala280Val)	VAR_044047	786	Brugada syndrome 2|Cardiovascular phenotype|Death in infancy|not provided	Pathogenic/Likely pathogenic(Last reviewed: Jun 21, 2016)	Disease	Y
GPR179	NM_001004334.3(GPR179):c.5605C>G (p.Gln1869Glu)	VAR_049289	193823	Congenital Stationary Night Blindness, Recessive|not specified	Benign/Likely benign(Last reviewed: Jun 14, 2016)	Polymorphism	Y
GRIP1	NM_021150.3(GRIP1):c.964G>A (p.Ala322Thr)	VAR_056904	310310	Cryptophthalmos syndrome|not provided	Benign/Likely benign(Last reviewed: May 03, 2017)	Polymorphism	Y
GRM6	NM_000843.3(GRM6):c.1214T>C (p.Ile405Thr)	VAR_069819	5847	Congenital stationary night blindness, type 1B|not provided	Pathogenic/Likely pathogenic(Last reviewed: Jan 26, 2017)	Disease	Y
GRN	NM_002087.3(GRN):c.55C>T (p.Arg19Trp)	VAR_064625	98120	Frontotemporal dementia|not provided|not specified	Benign/Likely benign(Last reviewed: May 03, 2017)	Polymorphism	Y
GRXCR1	NM_001080476.2(GRXCR1):c.272G>T (p.Gly91Val)	VAR_063163	178379	not provided|not specified	Benign/Likely benign(Last reviewed: Nov 07, 2016)	Polymorphism	Y
GRXCR1	NM_001080476.2(GRXCR1):c.25G>A (p.Glu9Lys)	VAR_063159	43887	Nonsyndromic Hearing Loss, Recessive|not specified	Benign/Likely benign(Last reviewed: Jun 14, 2016)	Polymorphism	Y
GSDME	NM_004403.2(GSDME):c.619G>A (p.Val207Met)	VAR_030825	44847	Nonsyndromic Hearing Loss, Mixed|not specified	Benign/Likely benign(Last reviewed: Jun 14, 2016)	Polymorphism	Y
GSDME	NM_004403.2(GSDME):c.424C>A (p.Pro142Thr)	VAR_030824	44843	Nonsyndromic Hearing Loss, Mixed|not specified	Benign/Likely benign(Last reviewed: Jun 14, 2016)	Polymorphism	Y
GUCY2D	NM_000180.3(GUCY2D):c.2101C>T (p.Pro701Ser)	VAR_009132	98558	not provided|not specified	Benign/Likely benign(Last reviewed: Mar 28, 2016)	Polymorphism	Y
GUCY2D	NM_000180.3(GUCY2D):c.61T>C (p.Trp21Arg)	VAR_067168	92581	not provided|not specified	Benign/Likely benign(Last reviewed: Jun 23, 2016)	Polymorphism	Y
GUSB	NM_000181.3(GUSB):c.1946T>C (p.Leu649Pro)	VAR_016179	92588	Mucopolysaccharidosis type VII|not specified	Benign(Last reviewed: Jun 14, 2016)	Polymorphism	Y
GYS1	NM_002103.4(GYS1):c.1246A>G (p.Met416Val)	VAR_014730	329814	Glycogen storage disease 0, muscle|not specified	Benign/Likely benign(Last reviewed: Jun 14, 2016)	Polymorphism	Y
GYS2	NM_021957.3(GYS2):c.1245C>G (p.Asp415Glu)	VAR_055886	137524	Hypoglycemia with deficiency of glycogen synthetase in the liver|not specified	Benign/Likely benign(Last reviewed: Jun 14, 2016)	Polymorphism	Y
GYS2	NM_021957.3(GYS2):c.577G>A (p.Ala193Thr)	VAR_055885	261471	not specified	Benign(Last reviewed: May 18, 2015)	Polymorphism	Y
GYS2	NM_021957.3(GYS2):c.1087A>G (p.Met363Val)	VAR_058848	261462	Hypoglycemia with deficiency of glycogen synthetase in the liver|not specified	Benign(Last reviewed: Jun 14, 2016)	Polymorphism	Y
HADHA	NM_000182.4(HADHA):c.1528G>C (p.Glu510Gln)	VAR_002273	100085	LCHAD Deficiency|Lchad deficiency with maternal acute fatty liver of pregnancy|Long-chain 3-hydroxyacyl-CoA dehydrogenase deficiency|Long-chain 3-hydroxyacyl-CoA dehydrogenase deficiency|Mitochondrial trifunctional protein deficiency|Mitochondrial trifunctional protein deficiency|not provided	Pathogenic(Last reviewed: May 18, 2017)	Disease	Y
HADHA	NM_000182.4(HADHA):c.1528G>C (p.Glu510Gln)	VAR_002273	100085	LCHAD Deficiency|Lchad deficiency with maternal acute fatty liver of pregnancy|Long-chain 3-hydroxyacyl-CoA dehydrogenase deficiency|Long-chain 3-hydroxyacyl-CoA dehydrogenase deficiency|Mitochondrial trifunctional protein deficiency|Mitochondrial trifunctional protein deficiency|not provided	Pathogenic(Last reviewed: May 18, 2017)	Disease	Y
HAX1	NM_006118.3(HAX1):c.514G>A (p.Val172Ile)	VAR_064515	68243	not provided|not specified	Likely benign(Last reviewed: Oct 25, 2016)	Disease	N
HBB	NM_000518.4(HBB):c.20A>T (p.Glu7Val)	VAR_002863	15333	Beta-thalassemia, dominant inclusion body type|Fetal hemoglobin quantitative trait locus 1|HEMOGLOBIN JAMAICA PLAIN|HEMOGLOBIN S|HEMOGLOBIN S (ANTILLES)|HEMOGLOBIN S (CAMEROON)|HEMOGLOBIN S (PROVIDENCE)|HEMOGLOBIN S (TRAVIS)|HEMOGLOBIN ZIGUINCHOR|HEMOGLOBIN ZIGUINCHOR|Hb SS disease|Hb SS disease|Heinz body anemia|Malaria, resistance to|Sickle cell-Hemoglobin O Arab disease|Susceptibility to malar…	Pathogenic, other, protective(Last reviewed: Jun 26, 2017)	Disease	Y
HBB	NM_000518.4(HBB):c.79G>A (p.Glu27Lys)	VAR_002907	15161	Beta-plus-thalassemia|HEMOGLOBIN T (CAMBODIA)|Hb SS disease|Hemoglobin E|Hemoglobin E/beta thalassemia disease|Malaria, resistance to|beta Thalassemia|not specified	Pathogenic, other, protective(Last reviewed: Jun 16, 2017)	Disease	Y
HBB	NM_000518.4(HBB):c.19G>A (p.Glu7Lys)	VAR_002864	15126	HEMOGLOBIN ARLINGTON PARK|HEMOGLOBIN C|Hb SS disease|Malaria, resistance to|not provided|not specified	Pathogenic, protective(Last reviewed: Jun 27, 2017)	Polymorphism	N
HBB	NM_000518.4(HBB):c.353A>G (p.His118Arg)	VAR_003041	36324	beta Thalassemia|not specified	Uncertain significance(Last reviewed: Nov 11, 2016)	Polymorphism	N
HBB	NM_000518.4(HBB):c.364G>A (p.Glu122Lys)	VAR_003049	15292	HEMOGLOBIN EGYPT|HEMOGLOBIN O (ARAB)|HEMOGLOBIN O (TIBESTI)|Hb SS disease|Sickle cell-Hemoglobin O Arab disease|beta Thalassemia|not provided|not specified	Pathogenic, other(Last reviewed: Jun 26, 2017)	Polymorphism	N
HCFC1	NM_005334.2(HCFC1):c.3490T>C (p.Ser1164Pro)	VAR_019813	95278	not specified	Benign/Likely benign(Last reviewed: Mar 31, 2016)	Polymorphism	Y
HCN1	NM_021072.3(HCN1):c.124C>T (p.Pro42Ser)	VAR_061105	404100	Early infantile epileptic encephalopathy|not provided	Uncertain significance(Last reviewed: May 31, 2017)	Polymorphism	N
HCN1	NM_021072.3(HCN1):c.140G>T (p.Gly47Val)	VAR_071825	193442	Early infantile epileptic encephalopathy|not specified	Benign/Likely benign(Last reviewed: Jan 06, 2017)	Unclassified	N
HEPACAM	NM_152722.4(HEPACAM):c.652A>G (p.Met218Val)	VAR_034731	262681	Megalencephalic leukoencephalopathy with subcortical cysts|not specified	Benign(Last reviewed: Jun 14, 2016)	Polymorphism	Y
HESX1	NM_003865.2(HESX1):c.374A>G (p.Asn125Ser)	VAR_010400	282975	Combined Pituitary Hormone Deficiency, Dominant/Recessive|Septo-optic dysplasia sequence|not specified	Benign/Likely benign(Last reviewed: Jun 14, 2016)	Polymorphism	Y
HEXA	NM_000520.5(HEXA):c.805G>A (p.Gly269Ser)	VAR_003225	3898	Gm2-gangliosidosis, adult|Tay-Sachs disease|not provided	Pathogenic(Last reviewed: Apr 05, 2017)	Disease	Y
HEXA	NM_000520.5(HEXA):c.1496G>A (p.Arg499His)	VAR_003244	3899	Gm2-gangliosidosis, juvenile|Inborn genetic diseases|Tay-Sachs disease	Pathogenic/Likely pathogenic(Last reviewed: Nov 06, 2015)	Disease	Y
HEXA	NM_000520.5(HEXA):c.533G>A (p.Arg178His)	VAR_003209	3896	Hexa, dn allele|Tay-Sachs disease|Tay-Sachs disease, B1 variant|not provided	Pathogenic(Last reviewed: Sep 16, 2016)	Disease	Y
HEXA	NM_000520.5(HEXA):c.964G>T (p.Asp322Tyr)	VAR_077499	221281	Tay-Sachs disease	Pathogenic/Likely pathogenic(Last reviewed: Nov 02, 2016)	Disease	Y
HEXA	NM_000520.5(HEXA):c.1195A>G (p.Asn399Asp)	VAR_003233	93188	Tay-Sachs disease|not provided|not specified	Benign/Likely benign(Last reviewed: Jun 14, 2016)	Polymorphism	Y
HEXA	NM_000520.5(HEXA):c.1306A>G (p.Ile436Val)	VAR_003235	93189	Tay-Sachs disease|not specified	Benign/Likely benign(Last reviewed: Aug 15, 2016)	Polymorphism	Y
HEXB	NM_000521.3(HEXB):c.1250C>T (p.Pro417Leu)	VAR_003251	3878	Sandhoff disease|Sandhoff disease, adult type|Sandhoff disease, juvenile type|not provided	Pathogenic/Likely pathogenic(Last reviewed: Nov 12, 2016)	Disease	Y
HEXB	NM_000521.3(HEXB):c.619A>G (p.Ile207Val)	VAR_003249	93202	HEXB POLYMORPHISM|Sandhoff disease|not specified	Benign/Likely benign(Last reviewed: Jun 14, 2016)	Polymorphism	Y
HEXB	NM_000521.3(HEXB):c.362A>G (p.Lys121Arg)	VAR_003248	3874	HEXB POLYMORPHISM|Sandhoff disease|not specified	Benign/Likely benign(Last reviewed: Jun 14, 2016)	Polymorphism	Y
HFE	NM_000410.3(HFE):c.18G>C (p.Arg6Ser)	VAR_042506	216425	Hemochromatosis type 1|not specified	Uncertain significance(Last reviewed: Apr 22, 2016)	Disease	N
HFE2	NM_213653.3(HFE2):c.959G>T (p.Gly320Val)	VAR_019629	2365	Hemochromatosis type 1|Hemochromatosis type 2A	Pathogenic(Last reviewed: Jan 08, 2017)	Disease	Y
HGD	NM_000187.3(HGD):c.1102A>G (p.Met368Val)	VAR_005287	3173	Alkaptonuria	Pathogenic(Last reviewed: Dec 18, 2015)	Disease	Y
HGD	NM_000187.3(HGD):c.688C>T (p.Pro230Ser)	VAR_005283	3165	Alkaptonuria	Pathogenic(Last reviewed: Jun 14, 2016)	Disease	Y
HGD	NM_000187.3(HGD):c.240A>T (p.Gln80His)	VAR_049353	255481	Alkaptonuria|not specified	Benign(Last reviewed: Jun 14, 2016)	Polymorphism	Y
HGF	NM_000601.5(HGF):c.910G>A (p.Glu304Lys)	VAR_019199	43611	Nonsyndromic Hearing Loss, Mixed|not specified	Benign/Likely benign(Last reviewed: Aug 16, 2016)	Polymorphism	Y
HIBCH	NM_014362.3(HIBCH):c.365A>G (p.Tyr122Cys)	VAR_031870	1145	Beta-hydroxyisobutyryl-CoA deacylase deficiency|not provided	Pathogenic(Last reviewed: Nov 09, 2016)	Disease	Y
HLCS	NM_000411.6(HLCS):c.126G>T (p.Glu42Asp)	VAR_035800	137548	Holocarboxylase synthetase deficiency|not specified	Benign/Likely benign(Last reviewed: Jun 14, 2016)	Unclassified	N
HLCS	NM_000411.6(HLCS):c.126G>T (p.Glu42Asp)	VAR_035800	137548	Holocarboxylase synthetase deficiency|not specified	Benign/Likely benign(Last reviewed: Jun 14, 2016)	Unclassified	N
HMCN1	NM_031935.2(HMCN1):c.8678A>G (p.Glu2893Gly)	VAR_024814	96208	Macular degeneration|not specified	Benign/Likely benign(Last reviewed: Jun 14, 2016)	Polymorphism	Y
HMGCS2	NM_005518.3(HMGCS2):c.634G>A (p.Gly212Arg)	VAR_032759	9259	mitochondrial 3-hydroxy-3-methylglutaryl-CoA synthase deficiency|not provided	Pathogenic/Likely pathogenic(Last reviewed: Feb 21, 2017)	Disease	Y
HNF1A	NM_000545.6(HNF1A):c.79A>C (p.Ile27Leu)	VAR_007905	14937	Insulin resistance, susceptibility to|Maturity-onset diabetes of the young|SERUM HDL CHOLESTEROL LEVEL, MODIFIER OF|not specified	Benign/Likely benign, risk factor(Last reviewed: Jun 14, 2016)	Polymorphism	Y
HNF1A	NM_000545.6(HNF1A):c.293C>T (p.Ala98Val)	VAR_010540	129233	Maturity-onset diabetes of the young|Monogenic diabetes|not specified	Benign/Likely benign(Last reviewed: Jun 14, 2016)	Polymorphism	Y
HNF1A	NM_000545.6(HNF1A):c.1460G>A (p.Ser487Asn)	VAR_007906	129230	Maturity-onset diabetes of the young|not specified	Benign/Likely benign(Last reviewed: Jun 14, 2016)	Polymorphism	Y
HNF1B	NM_000458.3(HNF1B):c.226G>T (p.Gly76Cys)	VAR_046014	193102	Familial hypoplastic, glomerulocystic kidney|not specified	Likely benign(Last reviewed: Jun 14, 2016)	Disease	N
HNF4A	NM_000457.4(HNF4A):c.253C>T (p.Arg85Trp)	VAR_071951	156152	Fanconi renotubular syndrome 4 with maturity-onset diabetes of the young|Hyperinsulinemia|Hyperinsulinism due to HNF4A deficiency|not provided	Pathogenic(Last reviewed: Apr 27, 2017)	Disease	Y
HNF4A	NM_000457.4(HNF4A):c.416C>T (p.Thr139Ile)	VAR_004669	129240	Hyperinsulinism, Dominant|Maturity-onset diabetes of the young|Monogenic diabetes|not specified	Benign/Likely benign(Last reviewed: Jun 14, 2016)	Polymorphism	Y
HOXB13	NM_006361.5(HOXB13):c.251G>A (p.Gly84Glu)	VAR_071866	128031	Prostate cancer susceptibility|not provided	Pathogenic, risk factor(Last reviewed: May 22, 2017)	Disease	Y
HPS1	NM_000195.4(HPS1):c.847G>T (p.Gly283Trp)	VAR_005290	21108	Hermansky-Pudlak syndrome|Hermansky-Pudlak syndrome 1|not specified	Benign/Likely benign(Last reviewed: Jun 14, 2016)	Polymorphism	Y
HPS1	NM_000195.4(HPS1):c.1472C>G (p.Pro491Arg)	VAR_005291	21094	Hermansky-Pudlak syndrome|Hermansky-Pudlak syndrome 1|not specified	Benign/Likely benign(Last reviewed: Jun 14, 2016)	Polymorphism	Y
HPS1	NM_000195.4(HPS1):c.1808A>G (p.Gln603Arg)	VAR_005292	21099	Hermansky-Pudlak syndrome|Hermansky-Pudlak syndrome 1|not specified	Benign/Likely benign(Last reviewed: Jun 14, 2016)	Polymorphism	Y
HPS4	NM_022081.5(HPS4):c.1875G>T (p.Gln625His)	VAR_021836	163670	Hermansky-Pudlak syndrome|not specified	Benign(Last reviewed: Jun 14, 2016)	Polymorphism	Y
HPS4	NM_022081.5(HPS4):c.1816C>T (p.His606Tyr)	VAR_024159	163671	Hermansky-Pudlak syndrome|not specified	Benign(Last reviewed: Jun 14, 2016)	Polymorphism	Y
HPS4	NM_022081.5(HPS4):c.1327C>G (p.Leu443Val)	VAR_024158	163673	Hermansky-Pudlak syndrome|not specified	Benign(Last reviewed: Jun 14, 2016)	Polymorphism	Y
HPS4	NM_022081.5(HPS4):c.1654G>A (p.Val552Met)	VAR_025007	163672	Hermansky-Pudlak syndrome|not specified	Benign(Last reviewed: Jun 14, 2016)	Polymorphism	Y
HPS4	NM_022081.5(HPS4):c.686A>G (p.Glu229Gly)	VAR_025006	163674	Hermansky-Pudlak syndrome|not specified	Benign(Last reviewed: Jun 14, 2016)	Polymorphism	Y
HPS5	NM_181507.1(HPS5):c.1249C>A (p.Leu417Met)	VAR_015513	163677	Hermansky-Pudlak syndrome|not specified	Benign/Likely benign(Last reviewed: Jun 14, 2016)	Polymorphism	Y
HR	NM_005144.4(HR):c.1859G>A (p.Arg620Gln)	VAR_005265	362507	Alopecia universalis|Atrichia with papular lesions|not specified	Likely benign(Last reviewed: Jun 14, 2016)	Polymorphism	Y
HRAS	NM_005343.3(HRAS):c.38G>A (p.Gly13Asp)	VAR_026108	12604	Colorectal Neoplasms|Costello syndrome|not provided	Pathogenic(Last reviewed: Jan 04, 2017)	Disease	Y
HRAS	NM_005343.3(HRAS):c.350A>G (p.Lys117Arg)	VAR_045981	12605	Costello syndrome|not provided	Pathogenic(Last reviewed: Feb 03, 2016)	Disease	Y
HRAS	NM_005343.3(HRAS):c.37G>T (p.Gly13Cys)	VAR_026107	12606	Acute myeloid leukemia|Adenocarcinoma of lung|Adenocarcinoma of stomach|Chronic lymphocytic leukemia|Colorectal Neoplasms|Costello syndrome|Hepatocellular carcinoma|Malignant melanoma of skin|Malignant neoplasm of body of uterus|Multiple myeloma|Neoplasm|Neoplasm of the breast|Neoplasm of the thyroid gland|Pancreatic adenocarcinoma|Rasopathy|Squamous cell carcinoma of lung|Squamous cell carcinoma…	Pathogenic/Likely pathogenic(Last reviewed: Jan 04, 2017)	Disease	Y
HRAS	NM_005343.3(HRAS):c.34G>T (p.Gly12Cys)	VAR_045975	12613	Acute myeloid leukemia|Adenocarcinoma of lung|Adenocarcinoma of prostate|Adenocarcinoma of stomach|Adenoid cystic carcinoma|Bladder carcinoma|Carcinoma of esophagus|Colorectal Neoplasms|Costello syndrome|Epidermal nevus|Glioblastoma|Hepatocellular carcinoma|Malignant melanoma of skin|Malignant neoplasm of body of uterus|Multiple myeloma|Myelodysplastic syndrome|Nasopharyngeal Neoplasms|Neoplasm o…	Pathogenic/Likely pathogenic(Last reviewed: Apr 27, 2017)	Disease	Y
HRAS	NM_005343.3(HRAS):c.34G>A (p.Gly12Ser)	VAR_006837	12602	Acute myeloid leukemia|Adenocarcinoma of lung|Adenocarcinoma of prostate|Adenocarcinoma of stomach|Adenoid cystic carcinoma|Carcinoma of esophagus|Colorectal Neoplasms|Costello syndrome|Epidermal nevus with urothelial cancer, somatic|Glioblastoma|Hepatocellular carcinoma|Malignant melanoma of skin|Malignant neoplasm of body of uterus|Multiple myeloma|Myelodysplastic syndrome|Myopathy, congenital,…	Pathogenic/Likely pathogenic(Last reviewed: Apr 27, 2017)	Disease	Y
HRAS	NM_005343.3(HRAS):c.34G>A (p.Gly12Ser)	VAR_006837	12602	Acute myeloid leukemia|Adenocarcinoma of lung|Adenocarcinoma of prostate|Adenocarcinoma of stomach|Adenoid cystic carcinoma|Carcinoma of esophagus|Colorectal Neoplasms|Costello syndrome|Epidermal nevus with urothelial cancer, somatic|Glioblastoma|Hepatocellular carcinoma|Malignant melanoma of skin|Malignant neoplasm of body of uterus|Multiple myeloma|Myelodysplastic syndrome|Myopathy, congenital,…	Pathogenic/Likely pathogenic(Last reviewed: Apr 27, 2017)	Disease	Y
HRAS	NM_005343.3(HRAS):c.35G>C (p.Gly12Ala)	VAR_026106	12603	Acute myeloid leukemia|Adenocarcinoma of lung|Adenocarcinoma of prostate|Adenocarcinoma of stomach|Adenoid cystic carcinoma|Carcinoma of esophagus|Colorectal Neoplasms|Costello syndrome|Glioblastoma|Hepatocellular carcinoma|Malignant melanoma of skin|Malignant neoplasm of body of uterus|Multiple myeloma|Myelodysplastic syndrome|Nasopharyngeal Neoplasms|Neoplasm of the breast|Neoplasm of the thyro…	Pathogenic/Likely pathogenic(Last reviewed: Jan 04, 2017)	Disease	Y
HRAS	NM_005343.3(HRAS):c.35G>A (p.Gly12Asp)	VAR_068816	12612	Costello syndrome|Costello syndrome, severe|Neoplasm of the breast|Nevus sebaceous|Rasopathy|not provided	Pathogenic/Likely pathogenic(Last reviewed: Apr 27, 2017)	Disease	Y
HRAS	NM_005343.3(HRAS):c.35G>T (p.Gly12Val)	VAR_006836	12600	Costello syndrome|Epidermal nevus|Malignant melanoma|Malignant tumor of urinary bladder|Myopathy, congenital, with excess of muscle spindles|Neoplasm of the thyroid gland|not provided	Pathogenic/Likely pathogenic(Last reviewed: Apr 27, 2017)	Disease	Y
HRAS	NM_005343.3(HRAS):c.35G>T (p.Gly12Val)	VAR_006836	12600	Costello syndrome|Epidermal nevus|Malignant melanoma|Malignant tumor of urinary bladder|Myopathy, congenital, with excess of muscle spindles|Neoplasm of the thyroid gland|not provided	Pathogenic/Likely pathogenic(Last reviewed: Apr 27, 2017)	Disease	Y
HRAS	NM_005343.3(HRAS):c.35G>T (p.Gly12Val)	VAR_006836	12600	Costello syndrome|Epidermal nevus|Malignant melanoma|Malignant tumor of urinary bladder|Myopathy, congenital, with excess of muscle spindles|Neoplasm of the thyroid gland|not provided	Pathogenic/Likely pathogenic(Last reviewed: Apr 27, 2017)	Unclassified	N
HSD17B3	NM_000197.1(HSD17B3):c.238C>T (p.Arg80Trp)	VAR_006954	4877	17-Beta-Hydroxysteroid Dehydrogenase III Deficiency|Testosterone 17-beta-dehydrogenase deficiency|not provided	Pathogenic/Likely pathogenic(Last reviewed: May 04, 2017)	Disease	Y
HSD17B3	NM_000197.1(HSD17B3):c.865G>A (p.Gly289Ser)	VAR_014871	255511	17-Beta-Hydroxysteroid Dehydrogenase III Deficiency|not specified	Likely benign(Last reviewed: Jun 14, 2016)	Polymorphism	Y
HSD17B4	NM_000414.3(HSD17B4):c.46G>A (p.Gly16Ser)	VAR_037576	7655	Bifunctional peroxisomal enzyme deficiency|not provided	Pathogenic/Likely pathogenic(Last reviewed: Jul 31, 2016)	Disease	Y
HSD17B4	NM_000414.3(HSD17B4):c.1369A>T (p.Asn457Tyr)	VAR_065908	7656	Bifunctional peroxisomal enzyme deficiency|Bifunctional peroxisomal enzyme deficiency|Gonadal dysgenesis with auditory dysfunction, autosomal recessive inheritance|not provided	Pathogenic/Likely pathogenic(Last reviewed: Sep 01, 2016)	Disease	Y
HSD17B4	NM_000414.3(HSD17B4):c.1675A>G (p.Ile559Val)	VAR_014874	226667	Bifunctional peroxisomal enzyme deficiency|Perrault Syndrome|not specified	Benign(Last reviewed: Jun 14, 2016)	Polymorphism	Y
HSD17B4	NM_000414.3(HSD17B4):c.875C>G (p.Thr292Ser)	VAR_024625	226674	Bifunctional peroxisomal enzyme deficiency|Perrault Syndrome|not provided|not specified	Benign/Likely benign(Last reviewed: Jun 14, 2016)	Polymorphism	Y
HSD17B4	NM_000414.3(HSD17B4):c.1531T>C (p.Trp511Arg)	VAR_014873	226665	Bifunctional peroxisomal enzyme deficiency|Perrault Syndrome|not specified	Benign(Last reviewed: Jun 14, 2016)	Polymorphism	Y
HSD17B4	NM_000414.3(HSD17B4):c.317G>A (p.Arg106His)	VAR_014872	198079	Bifunctional peroxisomal enzyme deficiency|Perrault Syndrome|not specified	Benign(Last reviewed: Jun 14, 2016)	Polymorphism	Y
HSD17B4	NM_000414.3(HSD17B4):c.420A>T (p.Lys140Asn)	VAR_052310	226672	Bifunctional peroxisomal enzyme deficiency|Perrault Syndrome|not specified	Benign/Likely benign(Last reviewed: Jun 14, 2016)	Polymorphism	Y
HSD17B4	NM_000414.3(HSD17B4):c.2060C>T (p.Thr687Ile)	VAR_052314	226669	Bifunctional peroxisomal enzyme deficiency|Perrault Syndrome|not specified	Benign/Likely benign(Last reviewed: Jun 14, 2016)	Polymorphism	Y
HSD17B4	NM_000414.3(HSD17B4):c.2182A>G (p.Met728Val)	VAR_052315	226670	Bifunctional peroxisomal enzyme deficiency|Perrault Syndrome|not specified	Benign/Likely benign(Last reviewed: Jun 14, 2016)	Polymorphism	Y
HSD3B7	NM_025193.3(HSD3B7):c.1040T>C (p.Leu347Pro)	VAR_048100	261869	not specified	Benign(Last reviewed: Mar 08, 2016)	Polymorphism	Y
HSD3B7	NM_025193.3(HSD3B7):c.748A>G (p.Thr250Ala)	VAR_031040	261873	not specified	Benign(Last reviewed: Feb 25, 2016)	Polymorphism	Y
HSPB1	NM_001540.4(HSPB1):c.407G>T (p.Arg136Leu)	VAR_077488	217230	Charcot-Marie-Tooth disease type 2F|not provided	Pathogenic/Likely pathogenic(Last reviewed: Feb 03, 2016)	Disease	Y
HSPB1	NM_001540.4(HSPB1):c.407G>T (p.Arg136Leu)	VAR_077488	217230	Charcot-Marie-Tooth disease type 2F|not provided	Pathogenic/Likely pathogenic(Last reviewed: Feb 03, 2016)	Disease	Y
HSPG2	NM_005529.6(HSPG2):c.5755C>T (p.Arg1919Cys)	VAR_047985	197547	Dyssegmental Dysplasia|Schwartz Jampel syndrome type 1|not specified	Benign/Likely benign(Last reviewed: Jun 14, 2016)	Polymorphism	Y
HSPG2	NM_005529.6(HSPG2):c.8939T>A (p.Leu2980His)	VAR_047987	295765	Dyssegmental Dysplasia|Schwartz Jampel syndrome type 1|not specified	Benign/Likely benign(Last reviewed: Nov 10, 2016)	Polymorphism	Y
HSPG2	NM_005529.6(HSPG2):c.8983A>G (p.Ser2995Gly)	VAR_047989	295764	Dyssegmental Dysplasia|Schwartz Jampel syndrome type 1|not specified	Benign/Likely benign(Last reviewed: Nov 10, 2016)	Polymorphism	Y
HSPG2	NM_005529.6(HSPG2):c.4508C>T (p.Ala1503Val)	VAR_047983	291236	Dyssegmental Dysplasia|Schwartz Jampel syndrome type 1|not specified	Benign(Last reviewed: Sep 20, 2016)	Polymorphism	Y
IDH2	NM_002168.3(IDH2):c.419G>A (p.Arg140Gln)	VAR_065175	14716	Acute myeloid leukemia|Colorectal Neoplasms|D-2-hydroxyglutaric aciduria 2|Multiple myeloma|Myelodysplastic syndrome|Squamous cell carcinoma of the head and neck|not provided	Pathogenic/Likely pathogenic(Last reviewed: May 31, 2016)	Disease	Y
IDS	NM_000202.7(IDS):c.998C>T (p.Ser333Leu)	VAR_007360	10487	Mucopolysaccharidosis, MPS-II|not provided	Pathogenic(Last reviewed: Aug 29, 2013)	Disease	Y
IDS	NM_000202.7(IDS):c.1403G>A (p.Arg468Gln)	VAR_007377	10498	Mucopolysaccharidosis, MPS-II|Mucopolysaccharidosis, MPS-II|Mucopolysaccharidosis, type II, severe form|not provided	Pathogenic(Last reviewed: Sep 25, 2013)	Disease	Y
IDS	NM_000202.7(IDS):c.253G>A (p.Ala85Thr)	VAR_007319	92617	Mucopolysaccharidosis, MPS-II|not provided	Pathogenic(Last reviewed: Sep 05, 2012)	Disease	Y
IDS	NM_000202.7(IDS):c.1402C>T (p.Arg468Trp)	VAR_007378	10497	Mucopolysaccharidosis, MPS-II|Mucopolysaccharidosis, type II, mild form	Pathogenic(Last reviewed: Jul 28, 2014)	Disease	Y
IDUA	NM_000203.4(IDUA):c.99T>G (p.His33Gln)	VAR_003350	92651	Mucopolysaccharidosis type I|not specified	Benign(Last reviewed: Jun 14, 2016)	Polymorphism	Y
IDUA	NM_000203.4(IDUA):c.246C>G (p.His82Gln)	VAR_020976	92637	Mucopolysaccharidosis type I|not provided|not specified	Benign/Likely benign, other(Last reviewed: Feb 11, 2016)	Polymorphism	Y
IDUA	NM_000203.4(IDUA):c.314G>A (p.Arg105Gln)	VAR_003356	92641	Mucopolysaccharidosis type I|not specified	Benign/Likely benign(Last reviewed: Nov 02, 2016)	Polymorphism	Y
IDUA	NM_000203.4(IDUA):c.1081G>A (p.Ala361Thr)	VAR_003364	92624	Mucopolysaccharidosis type I|not specified	Benign(Last reviewed: Jun 14, 2016)	Polymorphism	Y
IDUA	NM_000203.4(IDUA):c.1360G>A (p.Val454Ile)	VAR_003372	92630	Mucopolysaccharidosis type I|not specified	Benign(Last reviewed: Jun 14, 2016)	Polymorphism	Y
IFIH1	NM_022168.3(IFIH1):c.2336G>A (p.Arg779His)	VAR_071382	137622	Aicardi-goutieres syndrome 7|not provided	Pathogenic(Last reviewed: Aug 01, 2017)	Disease	Y
IFITM5	NM_001025295.2(IFITM5):c.80G>C (p.Gly27Ala)	VAR_062170	193131	not specified	Benign(Last reviewed: Mar 25, 2015)	Polymorphism	Y
IGF1R	NM_000875.4(IGF1R):c.1532G>A (p.Arg511Gln)	VAR_034894	14794	Insulin-like growth factor 1 resistance to|not provided|not specified	Uncertain significance, protective(Last reviewed: Dec 31, 2016)	Polymorphism	N
IGF1R	NM_000875.4(IGF1R):c.1310G>A (p.Arg437His)	VAR_034893	198108	not provided|not specified	Likely benign(Last reviewed: Mar 17, 2017)	Polymorphism	Y
IGHMBP2	NM_002180.2(IGHMBP2):c.2922T>G (p.Asp974Glu)	VAR_022340	194494	Spinal muscular atrophy|not specified	Uncertain significance(Last reviewed: Jun 14, 2016)	Disease	N
IGHMBP2	NM_002180.2(IGHMBP2):c.2636C>A (p.Thr879Lys)	VAR_022339	194368	Spinal muscular atrophy|not specified	Benign(Last reviewed: Jun 14, 2016)	Disease	N
IGHMBP2	NM_002180.2(IGHMBP2):c.1540G>A (p.Glu514Lys)	VAR_022330	9112	Spinal muscular atrophy, distal, autosomal recessive, 1|Werdnig-Hoffmann disease|not provided	Pathogenic(Last reviewed: Sep 23, 2015)	Disease	Y
IGHMBP2	NM_002180.2(IGHMBP2):c.1478C>T (p.Thr493Ile)	VAR_058504	217450	Charcot-Marie-Tooth disease, axonal, type 2S|Spinal muscular atrophy, distal, autosomal recessive, 1|not provided	Pathogenic/Likely pathogenic(Last reviewed: Oct 05, 2017)	Disease	Y
IGHMBP2	NM_002180.2(IGHMBP2):c.823A>G (p.Ile275Val)	VAR_024243	258577	Spinal muscular atrophy|not specified	Benign(Last reviewed: Jun 14, 2016)	Polymorphism	Y
IGHMBP2	NM_002180.2(IGHMBP2):c.223G>A (p.Ala75Thr)	VAR_055225	258568	not specified	Benign(Last reviewed: Mar 03, 2016)	Polymorphism	Y
IGHMBP2	NM_002180.2(IGHMBP2):c.2080C>T (p.Arg694Trp)	VAR_021899	258567	Spinal muscular atrophy|not specified	Benign(Last reviewed: Jun 14, 2016)	Polymorphism	Y
IGHMBP2	NM_002180.2(IGHMBP2):c.2782G>A (p.Glu928Lys)	VAR_021900	258573	Spinal muscular atrophy|not specified	Benign/Likely benign(Last reviewed: Jun 14, 2016)	Polymorphism	Y
IGHMBP2	NM_002180.2(IGHMBP2):c.602T>C (p.Leu201Ser)	VAR_024242	258576	Spinal muscular atrophy|not specified	Benign(Last reviewed: Jun 14, 2016)	Polymorphism	Y
IGHMBP2	NM_002180.2(IGHMBP2):c.2011A>G (p.Thr671Ala)	VAR_020147	258566	Spinal muscular atrophy|not specified	Benign(Last reviewed: Jun 14, 2016)	Polymorphism	Y
IL10RA	NM_001558.3(IL10RA):c.1051A>G (p.Arg351Gly)	VAR_016298	302554	Inflammatory bowel disease|not specified	Benign(Last reviewed: Jun 14, 2016)	Polymorphism	Y
IL10RA	NM_001558.3(IL10RA):c.475A>G (p.Ser159Gly)	VAR_016296	197197	Inflammatory bowel disease|not specified	Benign/Likely benign(Last reviewed: Jun 14, 2016)	Polymorphism	Y
IL10RB	NM_000628.4(IL10RB):c.139A>G (p.Lys47Glu)	VAR_020666	16923	Hepatitis b virus, susceptibility to|Inflammatory bowel disease|not specified	Benign, risk factor(Last reviewed: Jun 14, 2016)	Polymorphism	Y
IL12RB1	NM_005535.2(IL12RB1):c.467G>A (p.Arg156His)	VAR_021283	328598	Familial Atypical Mycobacteriosis, Autosomal Recessive|not specified	Benign/Likely benign(Last reviewed: Jun 14, 2016)	Polymorphism	Y
IL12RB1	NM_005535.2(IL12RB1):c.641A>G (p.Gln214Arg)	VAR_021284	328597	Familial Atypical Mycobacteriosis, Autosomal Recessive|not specified	Benign(Last reviewed: Jun 14, 2016)	Polymorphism	Y
IL12RB1	NM_005535.2(IL12RB1):c.1094T>C (p.Met365Thr)	VAR_011986	328588	Familial Atypical Mycobacteriosis, Autosomal Recessive|not specified	Benign(Last reviewed: Jun 14, 2016)	Polymorphism	Y
IL12RB1	NM_005535.2(IL12RB1):c.1132G>C (p.Gly378Arg)	VAR_011987	328587	Familial Atypical Mycobacteriosis, Autosomal Recessive|not specified	Benign(Last reviewed: Jun 14, 2016)	Polymorphism	Y
IL17F	NM_052872.3(IL17F):c.377A>G (p.Glu126Gly)	VAR_058287	357469	Familial Candidiasis, Dominant|not specified	Benign(Last reviewed: Jun 14, 2016)	Polymorphism	Y
IL17RA	NM_014339.6(IL17RA):c.1100C>T (p.Ala367Val)	VAR_027966	340591	Familial Candidiasis, Recessive|not specified	Benign(Last reviewed: Jun 14, 2016)	Polymorphism	Y
IL7R	NM_002185.4(IL7R):c.1241C>T (p.Thr414Met)	VAR_047742	134536	Severe Combined Immune Deficiency|not specified	Benign/Likely benign(Last reviewed: Jun 14, 2016)	Polymorphism	Y
IL7R	NM_002185.3(IL7R):c.1066A>G (p.Ile356Val)	VAR_021290	134533	Severe Combined Immune Deficiency|not specified	Benign(Last reviewed: Jun 14, 2016)	Polymorphism	Y
IL7R	NM_002185.3(IL7R):c.731C>T (p.Thr244Ile)	VAR_021289	134530	Severe Combined Immune Deficiency|not specified	Benign(Last reviewed: Jun 14, 2016)	Polymorphism	Y
IMPG2	NM_016247.3(IMPG2):c.2021C>T (p.Thr674Ile)	VAR_039145	95747	Retinitis Pigmentosa, Recessive|not specified	Benign(Last reviewed: Jun 14, 2016)	Polymorphism	Y
INF2	NM_022489.3(INF2):c.3286C>T (p.Pro1096Ser)	VAR_037117	261619	Focal segmental glomerulosclerosis|not specified	Benign(Last reviewed: Jun 14, 2016)	Polymorphism	Y
INF2	NM_022489.3(INF2):c.3404C>T (p.Thr1135Met)	VAR_037118	261620	Focal segmental glomerulosclerosis|not specified	Benign/Likely benign(Last reviewed: Nov 11, 2016)	Polymorphism	Y
INF2	NM_022489.3(INF2):c.3478G>A (p.Gly1160Ser)	VAR_072238	312709	Focal segmental glomerulosclerosis|not specified	Benign(Last reviewed: Jun 14, 2016)	Polymorphism	Y
INPP5E	NM_019892.5(INPP5E):c.603C>G (p.Ile201Met)	VAR_047078	129275	Joubert syndrome|not specified	Benign/Likely benign(Last reviewed: Jan 19, 2017)	Polymorphism	Y
INSR	NM_000208.3(INSR):c.5C>G (p.Ala2Gly)	VAR_058395	193063	Insulin-resistant diabetes mellitus AND acanthosis nigricans|Leprechaunism syndrome|Pineal hyperplasia AND diabetes mellitus syndrome|not specified	Benign(Last reviewed: Jun 14, 2016)	Polymorphism	Y
INVS	NM_014425.4(INVS):c.725C>T (p.Ser242Leu)	VAR_044119	95599	Nephronophthisis|not specified	Benign(Last reviewed: Jan 10, 2017)	Polymorphism	Y
IQCB1	NM_001023570.3(IQCB1):c.1303C>T (p.Arg435Cys)	VAR_051076	219524	Nephronophthisis|Renal dysplasia and retinal aplasia	Benign/Likely benign(Last reviewed: Oct 13, 2016)	Polymorphism	Y
IQCB1	NM_001023570.3(IQCB1):c.424T>C (p.Phe142Leu)	VAR_051074	219982	Nephronophthisis|not specified	Benign(Last reviewed: Aug 26, 2015)	Polymorphism	Y
IQCB1	NM_001023570.3(IQCB1):c.1301G>A (p.Cys434Tyr)	VAR_061668	257090	Renal dysplasia and retinal aplasia|not specified	Benign(Last reviewed: Jun 14, 2016)	Polymorphism	Y
IRAK4	NM_016123.3(IRAK4):c.1282G>A (p.Ala428Thr)	VAR_019356	308732	IRAK4 deficiency|not specified	Benign(Last reviewed: Jun 14, 2016)	Polymorphism	Y
IRF6	NM_006147.3(IRF6):c.16C>T (p.Arg6Cys)	VAR_030046	3417	Cleft palate|Van der Woude syndrome|not provided	Pathogenic/Likely pathogenic(Last reviewed: Jul 13, 2016)	Disease	Y
IRF6	NM_006147.3(IRF6):c.820G>A (p.Val274Ile)	VAR_014979	259928	Cleft Lip +/- Cleft Palate, Autosomal Dominant|Popliteal pterygium syndrome|Van der Woude syndrome|not specified	Benign(Last reviewed: Jun 14, 2016)	Polymorphism	Y
ISCA2	NM_194279.3(ISCA2):c.229G>A (p.Gly77Ser)	VAR_073794	183353	Death in infancy|Failure to thrive|Global developmental delay|High CSF lactic acid|Multiple mitochondrial dysfunctions syndrome|Multiple mitochondrial dysfunctions syndrome 4|Muscular hypotonia of the trunk|Neurodegeration|Optic atrophy|Spastic tetraplegia|not provided	Pathogenic/Likely pathogenic(Last reviewed: Mar 29, 2017)	Disease	Y
ITGA2B	NM_000419.4(ITGA2B):c.2621T>G (p.Ile874Ser)	VAR_003983	2891	BAK PLATELET-SPECIFIC ANTIGEN|Glanzmann thrombasthenia|not specified	Benign, association(Last reviewed: Jun 14, 2016)	Polymorphism	Y
JAG1	NM_000214.2(JAG1):c.2810G>A (p.Arg937Gln)	VAR_026335	213527	Arteriohepatic dysplasia|not provided|not specified	Benign/Likely benign(Last reviewed: Feb 13, 2017)	Disease	N
JAG1	NM_000214.2(JAG1):c.2666G>A (p.Arg889Gln)	VAR_026329	234323	Alagille syndrome 1|not specified	Uncertain significance(Last reviewed: May 16, 2016)	Disease	N
JAG1	NM_000214.2(JAG1):c.2612C>G (p.Pro871Arg)	VAR_026328	42475	Arteriohepatic dysplasia|Cardiovascular phenotype|not specified	Benign/Likely benign(Last reviewed: Jun 14, 2016)	Polymorphism	Y
JAG1	NM_000214.2(JAG1):c.436G>A (p.Val146Ile)	VAR_048985	42480	Arteriohepatic dysplasia|Isolated Nonsyndromic Congenital Heart Disease|not specified	Benign/Likely benign(Last reviewed: Jun 14, 2016)	Polymorphism	Y
JAK3	NM_000215.3(JAK3):c.452C>G (p.Pro151Arg)	VAR_010492	36422	Severe combined immunodeficiency disease|not provided|not specified	Benign/Likely benign(Last reviewed: Jul 12, 2016)	Disease	N
JPH2	NM_020433.4(JPH2):c.1186G>A (p.Ala396Thr)	VAR_053447	137607	Cardiovascular phenotype|not specified	Benign(Last reviewed: Jun 15, 2015)	Polymorphism	Y
JUP	NM_002230.2(JUP):c.56C>T (p.Thr19Ile)	VAR_065698	179756	Cardiomyopathy, ARVC|Cardiovascular phenotype|Naxos disease|not specified	Uncertain significance(Last reviewed: May 15, 2017)	Disease	N
JUP	NM_002230.2(JUP):c.2089A>T (p.Met697Leu)	VAR_037804	21304	Cardiomyopathy, ARVC|Cardiovascular phenotype|Naxos disease|not specified	Benign/Likely benign(Last reviewed: Jun 14, 2016)	Polymorphism	Y
JUP	NM_002230.2(JUP):c.1942G>A (p.Val648Ile)	VAR_065700	45842	Arrhythmogenic right ventricular cardiomyopathy, type 12|Cardiovascular phenotype|Naxos disease|not provided|not specified	Benign/Likely benign(Last reviewed: Mar 17, 2017)	Polymorphism	Y
JUP	NM_002230.2(JUP):c.425G>A (p.Arg142His)	VAR_065699	45851	Cardiomyopathy, ARVC|Cardiovascular phenotype|Naxos disease|not specified	Benign/Likely benign(Last reviewed: Jun 14, 2016)	Polymorphism	Y
KAT6B	NM_012330.3(KAT6B):c.4495G>A (p.Val1499Ile)	VAR_050217	260246	KAT6B-Related Spectrum Disorders|not specified	Benign(Last reviewed: Oct 05, 2016)	Polymorphism	Y
KCNA5	NM_002234.3(KCNA5):c.898G>A (p.Gly300Ser)	VAR_035770	191462	Familial atrial fibrillation|not provided	Uncertain significance(Last reviewed: Jun 14, 2016)	Unclassified	Y
KCNC3	NM_004977.2(KCNC3):c.1268G>A (p.Arg423His)	VAR_074197	208671	Inborn genetic diseases|not provided	Pathogenic(Last reviewed: Feb 09, 2017)	Disease	Y
KCND3	NM_004980.4(KCND3):c.1348C>T (p.Leu450Phe)	VAR_073831	192253	Brugada syndrome 9|not provided	Pathogenic/Likely pathogenic(Last reviewed: Aug 31, 2016)	Disease	Y
KCNE1	NM_000219.5(KCNE1):c.325G>A (p.Val109Ile)	VAR_012802	132678	Long QT syndrome|not provided|not specified	Uncertain significance(Last reviewed: Jan 24, 2017)	Disease	N
KCNE1	NM_000219.5(KCNE1):c.226G>A (p.Asp76Asn)	VAR_008901	13477	Cardiovascular phenotype|Congenital long QT syndrome|Jervell and Lange-Nielsen syndrome 1|Jervell and Lange-Nielsen syndrome 2|Long QT syndrome|Long QT syndrome 5|not provided	Pathogenic/Likely pathogenic(Last reviewed: Feb 01, 2017)	Disease	Y
KCNE1	NM_000219.5(KCNE1):c.226G>A (p.Asp76Asn)	VAR_008901	13477	Cardiovascular phenotype|Congenital long QT syndrome|Jervell and Lange-Nielsen syndrome 1|Jervell and Lange-Nielsen syndrome 2|Long QT syndrome|Long QT syndrome 5|not provided	Pathogenic/Likely pathogenic(Last reviewed: Feb 01, 2017)	Disease	Y
KCNE1	NM_000219.5(KCNE1):c.112A>G (p.Ser38Gly)	VAR_001558	132651	Cardiovascular phenotype|Hearing loss, noise-induced, susceptibility to|Jervell and Lange-Nielsen syndrome|Long QT syndrome|Romano-Ward syndrome|not provided|not specified	Benign(Last reviewed: Jun 14, 2016)	Polymorphism	Y
KCNE1	NM_000219.5(KCNE1):c.23C>T (p.Ala8Val)	VAR_074908	132670	Congenital long QT syndrome|Long QT syndrome|not specified	Uncertain significance(Last reviewed: Dec 19, 2016)	Unclassified	Y
KCNE1	NM_000219.5(KCNE1):c.247G>A (p.Glu83Lys)	VAR_074919	132673	Cardiovascular phenotype|Congenital long QT syndrome|not specified	Uncertain significance(Last reviewed: Mar 31, 2016)	Unclassified	Y
KCNE1	NM_000219.5(KCNE1):c.163G>A (p.Gly55Ser)	VAR_074913	132657	Congenital long QT syndrome|Long QT syndrome|not specified	Uncertain significance(Last reviewed: Sep 05, 2016)	Unclassified	Y
KCNE2	NM_172201.1(KCNE2):c.161T>C (p.Met54Thr)	VAR_008377	6053	Cardiac arrhythmia|Congenital long QT syndrome|KCNE2-Related Disorders|Long QT syndrome 6|not provided	Pathogenic/Likely pathogenic(Last reviewed: Mar 09, 2017)	Disease	Y
KCNE2	NM_172201.1(KCNE2):c.25C>G (p.Gln9Glu)	VAR_008376	6052	Cardiovascular phenotype|Long QT syndrome 6|Long QT syndrome 6, acquired, susceptibility to|not provided|not specified	Benign, risk factor(Last reviewed: Dec 15, 2016)	Polymorphism	Y
KCNE2	NM_172201.1(KCNE2):c.22A>G (p.Thr8Ala)	VAR_008375	67615	Cardiovascular phenotype|Long QT syndrome 6|Long QT syndrome, drug-associated|not provided|not specified	Benign(Last reviewed: Jan 19, 2017)	Polymorphism	Y
KCNH2	NM_000238.3(KCNH2):c.1682C>T (p.Ala561Val)	VAR_008580	14420	Congenital long QT syndrome|Long QT syndrome|Long QT syndrome 2|not provided	Pathogenic(Last reviewed: Jun 14, 2017)	Disease	Y
KCNH2	NM_000238.3(KCNH2):c.916G>T (p.Gly306Trp)	VAR_068255	67544	Congenital long QT syndrome|Long QT syndrome|not provided	Likely pathogenic(Last reviewed: Jun 10, 2016)	Disease	Y
KCNH2	NM_000238.3(KCNH2):c.1600C>T (p.Arg534Cys)	VAR_008579	67220	Congenital long QT syndrome|Long QT syndrome|not provided	Pathogenic(Last reviewed: Jan 19, 2017)	Disease	Y
KCNH2	NM_000238.3(KCNH2):c.1655T>C (p.Leu552Ser)	VAR_008918	67225	Cardiovascular phenotype|Congenital long QT syndrome|Long QT syndrome 2|not provided	Pathogenic(Last reviewed: Nov 04, 2016)	Disease	Y
KCNH2	NM_000238.3(KCNH2):c.1801G>A (p.Gly601Ser)	VAR_008926	67279	Congenital long QT syndrome|Long QT syndrome|Long QT syndrome 2	Pathogenic(Last reviewed: Jan 22, 2016)	Disease	Y
KCNH2	NM_000238.3(KCNH2):c.1841C>T (p.Ala614Val)	VAR_008931	29777	Congenital long QT syndrome|Long QT syndrome|Long QT syndrome 2|not provided	Pathogenic(Last reviewed: Dec 30, 2016)	Disease	Y
KCNH2	NM_000238.3(KCNH2):c.2320G>T (p.Asp774Tyr)	VAR_068277	67385	Congenital long QT syndrome|Long QT syndrome 2|not provided	Pathogenic/Likely pathogenic(Last reviewed: May 10, 2017)	Disease	Y
KCNH2	NM_000238.3(KCNH2):c.2414T>G (p.Phe805Cys)	VAR_014384	67397	Congenital long QT syndrome|Long QT syndrome|not provided	Pathogenic/Likely pathogenic(Last reviewed: Dec 25, 2016)	Disease	Y
KCNH2	NM_000238.3(KCNH2):c.2510A>G (p.Asp837Gly)	VAR_068280	67407	Congenital long QT syndrome|Long QT syndrome|not provided	Pathogenic/Likely pathogenic(Last reviewed: Jan 03, 2017)	Disease	Y
KCNH2	NM_000238.3(KCNH2):c.209A>G (p.His70Arg)	VAR_008912	67363	Congenital long QT syndrome|Long QT syndrome|not provided	Pathogenic/Likely pathogenic(Last reviewed: Jun 30, 2017)	Disease	Y
KCNH2	NM_000238.3(KCNH2):c.1750G>A (p.Gly584Ser)	VAR_008924	67261	Congenital long QT syndrome|Long QT syndrome|Long QT syndrome 2|Long QT syndrome 2|Short QT syndrome 1|not provided	Pathogenic(Last reviewed: Jan 23, 2017)	Disease	Y
KCNH2	NM_000238.3(KCNH2):c.1810G>A (p.Gly604Ser)	VAR_008927	67281	Congenital long QT syndrome|Long QT syndrome|not provided	Pathogenic(Last reviewed: Dec 30, 2016)	Disease	Y
KCNH2	NM_000238.3(KCNH2):c.1838C>T (p.Thr613Met)	VAR_008930	67292	Cardiovascular phenotype|Congenital long QT syndrome|not provided	Pathogenic/Likely pathogenic(Last reviewed: Oct 27, 2015)	Disease	Y
KCNH2	NM_000238.3(KCNH2):c.2690A>C (p.Lys897Thr)	VAR_014388	67427	Atrial fibrillation|Cardiovascular phenotype|Long QT syndrome|not provided|not specified	Benign/Likely benign(Last reviewed: Jun 14, 2016)	Polymorphism	Y
KCNH2	NM_000238.3(KCNH2):c.1501G>A (p.Asp501Asn)	VAR_074824	67208	Congenital long QT syndrome|Long QT syndrome|not provided	Pathogenic(Last reviewed: Dec 28, 2016)	Unclassified	N
KCNH2	NM_000238.3(KCNH2):c.1790A>G (p.Tyr597Cys)	VAR_074841	67277	Congenital long QT syndrome|Long QT syndrome|not provided	Likely pathogenic(Last reviewed: Nov 18, 2015)	Unclassified	N
KCNH2	NM_000238.3(KCNH2):c.1847A>G (p.Tyr616Cys)	VAR_074849	67295	Congenital long QT syndrome|Long QT syndrome|not provided	Pathogenic/Likely pathogenic(Last reviewed: Jul 12, 2016)	Unclassified	N
KCNH2	NM_000238.3(KCNH2):c.491G>A (p.Arg164His)	VAR_074798	67508	Congenital long QT syndrome|Long QT syndrome|Long QT syndrome 2	Uncertain significance(Last reviewed: Aug 10, 2016)	Unclassified	Y
KCNH2	NM_000238.3(KCNH2):c.775G>A (p.Asp259Asn)	VAR_074802	67527	Congenital long QT syndrome|Long QT syndrome|not specified	Uncertain significance(Last reviewed: Jul 12, 2016)	Unclassified	Y
KCNH2	NM_000238.3(KCNH2):c.2771G>C (p.Gly924Ala)	VAR_074894	67438	Congenital long QT syndrome|Long QT syndrome|not specified	Uncertain significance(Last reviewed: Jul 31, 2016)	Unclassified	Y
KCNH2	NM_000238.3(KCNH2):c.2717C>T (p.Ser906Leu)	VAR_074890	67429	Congenital long QT syndrome|Long QT syndrome|not specified	Uncertain significance(Last reviewed: Jun 23, 2016)	Unclassified	Y
KCNH2	NM_000238.3(KCNH2):c.3112G>A (p.Val1038Met)	VAR_074901	67471	Congenital long QT syndrome|Long QT syndrome|not specified	Uncertain significance(Last reviewed: Dec 16, 2016)	Unclassified	Y
KCNH2	NM_000238.3(KCNH2):c.2707G>A (p.Gly903Arg)	VAR_074889	67428	Congenital long QT syndrome|Long QT syndrome|not specified	Uncertain significance(Last reviewed: Apr 07, 2017)	Unclassified	Y
KCNJ10	NM_002241.4(KCNJ10):c.811C>T (p.Arg271Cys)	VAR_034018	129317	SeSAME syndrome|not specified	Benign/Likely benign(Last reviewed: Jan 25, 2017)	Polymorphism	Y
KCNJ11	NM_000525.3(KCNJ11):c.808C>G (p.Leu270Val)	VAR_008661	158685	Hyperinsulinism, Dominant/Recessive|Maturity-onset diabetes of the young|Monogenic diabetes|Transient Neonatal Diabetes, Dominant|not specified	Benign/Likely benign(Last reviewed: Jul 19, 2016)	Polymorphism	Y
KCNJ11	NM_000525.3(KCNJ11):c.1154C>G (p.Ser385Cys)	VAR_008665	36430	Hyperinsulinism, Dominant/Recessive|Maturity-onset diabetes of the young|Monogenic diabetes|Neonatal diabetes mellitus|Transient Neonatal Diabetes, Dominant|not specified	Benign/Likely benign(Last reviewed: Jun 14, 2016)	Polymorphism	Y
KCNJ2	NM_000891.2(KCNJ2):c.652C>T (p.Arg218Trp)	VAR_017856	8919	Andersen Tawil syndrome|Congenital long QT syndrome|not provided	Pathogenic(Last reviewed: Apr 18, 2017)	Disease	Y
KCNJ5	NM_000890.4(KCNJ5):c.844C>G (p.Gln282Glu)	VAR_063107	137993	Familial hyperaldosteronism|Romano-Ward syndrome|not specified	Benign(Last reviewed: Jun 14, 2016)	Polymorphism	Y
KCNJ8	NM_004982.3(KCNJ8):c.1001T>C (p.Val334Ala)	VAR_049670	137998	Brugada syndrome|not specified	Benign(Last reviewed: Jan 28, 2017)	Polymorphism	Y
KCNQ1	NM_000218.2(KCNQ1):c.1343C>G (p.Pro448Arg)	VAR_009931	67026	Cardiovascular phenotype|Long QT syndrome|not provided|not specified	Benign/Likely benign(Last reviewed: Aug 08, 2017)	Disease	N
KCNQ1	NM_000218.2(KCNQ1):c.1354C>T (p.Arg452Trp)	VAR_068314	52980	Congenital long QT syndrome|Long QT syndrome|not provided|not specified	Uncertain significance(Last reviewed: Sep 20, 2016)	Disease	N
KCNQ1	NM_000218.2(KCNQ1):c.217C>A (p.Pro73Thr)	VAR_068287	53031	Congenital long QT syndrome|Long QT syndrome 1|Long QT syndrome, LQT1 subtype|Short QT syndrome 2|not specified	Uncertain significance(Last reviewed: Dec 14, 2016)	Disease	N
KCNQ1	NM_000218.2(KCNQ1):c.1121T>A (p.Leu374His)	VAR_068311	52961	Congenital long QT syndrome|Long QT syndrome|not specified	Uncertain significance(Last reviewed: Jan 09, 2017)	Disease	N
KCNQ1	NM_000218.2(KCNQ1):c.569G>A (p.Arg190Gln)	VAR_001520	3117	Congenital long QT syndrome|Long QT syndrome|Long QT syndrome 1|not provided	Pathogenic(Last reviewed: May 22, 2017)	Disease	Y
KCNQ1	NM_000218.2(KCNQ1):c.760G>A (p.Val254Met)	VAR_001522	3118	Congenital long QT syndrome|Long QT syndrome|Long QT syndrome 1|not provided	Pathogenic/Likely pathogenic(Last reviewed: Oct 29, 2016)	Disease	Y
KCNQ1	NM_000218.2(KCNQ1):c.1663C>T (p.Arg555Cys)	VAR_001545	3126	Congenital long QT syndrome|Long QT syndrome|Long QT syndrome 1|not provided	Pathogenic(Last reviewed: Jan 09, 2017)	Disease	Y
KCNQ1	NM_000218.2(KCNQ1):c.1760C>T (p.Thr587Met)	VAR_008951	3138	Congenital long QT syndrome|Jervell and Lange-Nielsen syndrome 1|Long QT syndrome|not provided	Pathogenic(Last reviewed: Jan 09, 2017)	Disease	Y
KCNQ1	NM_000218.2(KCNQ1):c.805G>A (p.Gly269Ser)	VAR_009925	3144	Congenital long QT syndrome|Long QT syndrome|Long QT syndrome 1|not provided	Pathogenic(Last reviewed: Jan 13, 2017)	Disease	Y
KCNQ1	NM_000218.2(KCNQ1):c.806G>A (p.Gly269Asp)	VAR_001524	3145	Congenital long QT syndrome|Long QT syndrome|Long QT syndrome 1|not provided	Pathogenic(Last reviewed: Mar 23, 2017)	Disease	Y
KCNQ1	NM_000218.2(KCNQ1):c.1085A>G (p.Lys362Arg)	VAR_048025	52953	Congenital long QT syndrome|Long QT syndrome|not provided	Likely pathogenic(Last reviewed: Jan 09, 2017)	Disease	Y
KCNQ1	NM_000218.2(KCNQ1):c.1022C>A (p.Ala341Glu)	VAR_001538	3120	Congenital long QT syndrome|Long QT syndrome|Long QT syndrome 1|Long QT syndrome 1/2, digenic|not provided	Pathogenic(Last reviewed: Aug 06, 2016)	Disease	Y
KCNQ1	NM_000218.2(KCNQ1):c.1022C>T (p.Ala341Val)	VAR_001539	3121	Long QT syndrome|Long QT syndrome 1|not provided	Pathogenic(Last reviewed: Dec 13, 2016)	Disease	Y
KCNQ1	NM_000218.2(KCNQ1):c.502G>A (p.Gly168Arg)	VAR_001516	53052	Congenital long QT syndrome|Long QT syndrome|Long QT syndrome 1|not provided	Pathogenic(Last reviewed: May 10, 2017)	Disease	Y
KCNQ1	NM_000218.2(KCNQ1):c.520C>T (p.Arg174Cys)	VAR_001517	53058	Congenital long QT syndrome|Long QT syndrome|not provided	Pathogenic(Last reviewed: Jun 16, 2017)	Disease	Y
KCNQ1	NM_000218.2(KCNQ1):c.692G>A (p.Arg231His)	VAR_074957	53087	Atrial fibrillation, familial, 3|Congenital long QT syndrome|Long QT syndrome|Long QT syndrome 1|not provided	Pathogenic(Last reviewed: Apr 10, 2017)	Disease	Y
KCNQ1	NM_000218.2(KCNQ1):c.724G>A (p.Asp242Asn)	VAR_008940	53090	Congenital long QT syndrome|Long QT syndrome|not provided	Pathogenic/Likely pathogenic(Last reviewed: Jan 11, 2017)	Disease	Y
KCNQ1	NM_000218.2(KCNQ1):c.727C>T (p.Arg243Cys)	VAR_010933	53091	Congenital long QT syndrome|Long QT syndrome|not provided	Pathogenic(Last reviewed: Apr 29, 2016)	Disease	Y
KCNQ1	NM_000218.2(KCNQ1):c.775C>T (p.Arg259Cys)	VAR_068295	53100	Congenital long QT syndrome|Long QT syndrome|not provided	Pathogenic/Likely pathogenic(Last reviewed: Jul 02, 2017)	Disease	Y
KCNQ1	NM_000218.2(KCNQ1):c.830C>T (p.Ser277Leu)	VAR_065777	53116	Congenital long QT syndrome|Long QT syndrome|not provided	Pathogenic/Likely pathogenic(Last reviewed: Nov 28, 2016)	Disease	Y
KCNQ1	NM_000218.2(KCNQ1):c.965C>T (p.Thr322Met)	VAR_074692	53151	Cardiovascular phenotype|Congenital long QT syndrome|Long QT syndrome|not provided	Pathogenic/Likely pathogenic(Last reviewed: Jun 12, 2017)	Disease	Y
KCNQ1	NM_000218.2(KCNQ1):c.965C>T (p.Thr322Met)	VAR_074692	53151	Cardiovascular phenotype|Congenital long QT syndrome|Long QT syndrome|not provided	Pathogenic/Likely pathogenic(Last reviewed: Jun 12, 2017)	Disease	Y
KCNQ1	NM_000218.2(KCNQ1):c.973G>A (p.Gly325Arg)	VAR_001536	53152	Congenital long QT syndrome|Long QT syndrome|not provided	Pathogenic/Likely pathogenic(Last reviewed: Dec 27, 2016)	Disease	Y
KCNQ1	NM_000218.2(KCNQ1):c.1664G>A (p.Arg555His)	VAR_068318	53003	Congenital long QT syndrome|Long QT syndrome|not provided	Pathogenic(Last reviewed: Jan 09, 2017)	Disease	Y
KCNQ1	NM_000218.2(KCNQ1):c.1669A>G (p.Lys557Glu)	VAR_074693	67047	Cardiovascular phenotype|Congenital long QT syndrome|not provided	Pathogenic/Likely pathogenic(Last reviewed: Apr 26, 2017)	Disease	Y
KCNQ1	NM_000218.2(KCNQ1):c.1697C>T (p.Ser566Phe)	VAR_009932	53006	Congenital long QT syndrome|Long QT syndrome|Long QT syndrome 1|not provided	Likely pathogenic(Last reviewed: Oct 17, 2016)	Disease	Y
KCNQ1	NM_000218.2(KCNQ1):c.1700T>C (p.Ile567Thr)	VAR_075023	53007	Congenital long QT syndrome|Long QT syndrome|not provided	Pathogenic(Last reviewed: Dec 13, 2016)	Disease	Y
KCNQ1	NM_000218.2(KCNQ1):c.1702G>A (p.Gly568Arg)	VAR_068321	53009	Cardiovascular phenotype|Congenital long QT syndrome|Long QT syndrome, LQT1 subtype|not provided	Pathogenic/Likely pathogenic(Last reviewed: Jul 14, 2017)	Disease	Y
KCNQ1	NM_000218.2(KCNQ1):c.1781G>A (p.Arg594Gln)	VAR_009934	53018	Cardiovascular phenotype|Congenital long QT syndrome|Long QT syndrome|not provided	Pathogenic/Likely pathogenic(Last reviewed: Mar 01, 2017)	Disease	Y
KCNQ1	NM_000218.2(KCNQ1):c.1096C>T (p.Arg366Trp)	VAR_008948	52955	Congenital long QT syndrome|Long QT syndrome|Long QT syndrome 1|not provided	Pathogenic(Last reviewed: May 17, 2017)	Disease	Y
KCNQ1	NM_000218.2(KCNQ1):c.691C>T (p.Arg231Cys)	VAR_074956	53086	Congenital long QT syndrome|KCNQ1-related acquired long QT syndrome|Long QT syndrome 1|not provided	Pathogenic/Likely pathogenic(Last reviewed: May 23, 2017)	Disease	Y
KCNQ1	NM_000218.2(KCNQ1):c.797T>C (p.Leu266Pro)	VAR_009924	53108	Cardiovascular phenotype|Congenital long QT syndrome|Long QT syndrome|not provided	Pathogenic/Likely pathogenic(Last reviewed: Feb 06, 2017)	Disease	Y
KCNQ1	NM_000218.2(KCNQ1):c.1637C>T (p.Ser546Leu)	VAR_068317	53000	Congenital long QT syndrome|Long QT syndrome|Long QT syndrome 1|not provided	Pathogenic/Likely pathogenic(Last reviewed: Mar 14, 2017)	Disease	Y
KCNQ1	NM_000218.2(KCNQ1):c.1927G>A (p.Gly643Ser)	VAR_008954	36437	Cardiac arrhythmia|Familial atrial fibrillation|Jervell and Lange-Nielsen syndrome|Long QT syndrome|Romano-Ward syndrome|not provided|not specified|short QT syndrome	Benign/Likely benign(Last reviewed: Dec 25, 2016)	Polymorphism	Y
KCNQ1	NM_000218.2(KCNQ1):c.776G>A (p.Arg259His)	VAR_074964	53101	Congenital long QT syndrome|Long QT syndrome|not provided	Pathogenic(Last reviewed: Feb 02, 2017)	Unclassified	N
KCNQ1	NM_000218.2(KCNQ1):c.830C>G (p.Ser277Trp)	VAR_074970	53115	Congenital long QT syndrome|Long QT syndrome|not provided	Pathogenic/Likely pathogenic(Last reviewed: Nov 14, 2016)	Unclassified	N
KCNQ1	NM_000218.2(KCNQ1):c.1559T>G (p.Met520Arg)	VAR_075012	52993	Congenital long QT syndrome|Long QT syndrome|not provided	Pathogenic/Likely pathogenic(Last reviewed: Sep 14, 2016)	Unclassified	N
KCNQ1	NM_000218.2(KCNQ1):c.458C>T (p.Thr153Met)	VAR_074938	67075	Long QT syndrome|not provided|not specified	Uncertain significance(Last reviewed: Jan 18, 2017)	Unclassified	Y
KCNQ1	NM_000218.2(KCNQ1):c.583C>T (p.Arg195Trp)	VAR_074948	67087	Congenital long QT syndrome|Long QT syndrome	Uncertain significance(Last reviewed: Mar 05, 2015)	Unclassified	Y
KCNQ1	NM_000218.2(KCNQ1):c.484G>A (p.Val162Met)	VAR_074939	67077	Congenital long QT syndrome|Long QT syndrome|not specified	Uncertain significance(Last reviewed: Jan 03, 2017)	Unclassified	Y
KCNQ1	NM_000218.2(KCNQ1):c.803T>G (p.Ile268Ser)	VAR_074966	67107	Congenital long QT syndrome|Long QT syndrome|not specified	Uncertain significance(Last reviewed: Jan 16, 2017)	Unclassified	Y
KCNQ1	NM_000218.2(KCNQ1):c.1621G>A (p.Val541Ile)	VAR_075016	67043	Congenital long QT syndrome|not specified	Uncertain significance(Last reviewed: Oct 05, 2016)	Unclassified	Y
KCNQ1	NM_000218.2(KCNQ1):c.1903G>A (p.Gly635Arg)	VAR_075035	67062	Congenital long QT syndrome|not specified	Uncertain significance(Last reviewed: Oct 20, 2016)	Unclassified	Y
KCNQ1	NM_000218.2(KCNQ1):c.1799C>T (p.Thr600Met)	VAR_075032	67057	Cardiovascular phenotype|Congenital long QT syndrome|Long QT syndrome|not specified	Uncertain significance(Last reviewed: Dec 05, 2016)	Unclassified	Y
KCNQ2	NM_172107.3(KCNQ2):c.1742G>A (p.Arg581Gln)	VAR_078212	21769	Benign familial neonatal seizures 1|Epileptic encephalopathy|not provided	Pathogenic/Likely pathogenic(Last reviewed: Nov 16, 2016)	Disease	Y
KCNQ2	NM_172107.3(KCNQ2):c.638G>A (p.Arg213Gln)	VAR_078666	39760	Early infantile epileptic encephalopathy 7|not provided	Pathogenic/Likely pathogenic(Last reviewed: Dec 06, 2016)	Disease	Y
KCNQ2	NM_172107.3(KCNQ2):c.638G>A (p.Arg213Gln)	VAR_078666	39760	Early infantile epileptic encephalopathy 7|not provided	Pathogenic/Likely pathogenic(Last reviewed: Dec 06, 2016)	Disease	Y
KCNQ2	NM_172107.3(KCNQ2):c.1639C>T (p.Arg547Trp)	VAR_078674	205912	Benign familial neonatal seizures 1|not provided	Pathogenic/Likely pathogenic(Last reviewed: Sep 02, 2016)	Disease	Y
KCNQ2	NM_172107.3(KCNQ2):c.2339A>C (p.Asn780Thr)	VAR_010932	21779	Benign familial neonatal seizures 1|KCNQ2-Related Disorders|not specified	Benign(Last reviewed: Jun 14, 2016)	Polymorphism	Y
KCNQ2	NM_172107.3(KCNQ2):c.601C>T (p.Arg201Cys)	VAR_078663	205869	Early infantile epileptic encephalopathy 7|not provided	Pathogenic(Last reviewed: Mar 31, 2016)	Unclassified	N
KCNQ3	NM_004519.3(KCNQ3):c.1241A>G (p.Glu414Gly)	VAR_053859	21409	Benign Neonatal Epilepsy|Benign familial neonatal seizures|Benign familial neonatal seizures 2|not specified	Benign/Likely benign(Last reviewed: Jan 23, 2017)	Polymorphism	Y
KCNQ4	NM_004700.3(KCNQ4):c.1365T>G (p.His455Gln)	VAR_058971	45101	not specified	Benign(Last reviewed: May 07, 2012)	Polymorphism	Y
KCNV2	NM_133497.3(KCNV2):c.1597C>G (p.Leu533Val)	VAR_027638	262361	Cone dystrophy 3|not specified	Benign(Last reviewed: Jun 14, 2016)	Polymorphism	Y
KDM6A	NM_021140.3(KDM6A):c.2177C>A (p.Thr726Lys)	VAR_020313	134597	not specified	Benign(Last reviewed: Sep 29, 2015)	Polymorphism	Y
KIF1A	NM_001244008.1(KIF1A):c.296C>T (p.Thr99Met)	VAR_066649	30169	Mental retardation, autosomal dominant 9|PEHO syndrome|not provided	Pathogenic(Last reviewed: Oct 06, 2015)	Disease	Y
KIF1A	NM_001244008.1(KIF1A):c.946C>T (p.Arg316Trp)	VAR_075488	162060	Mental retardation, autosomal dominant 9|not provided	Pathogenic/Likely pathogenic(Last reviewed: Dec 09, 2016)	Disease	Y
KIF1BP	NM_015634.3(KIF1BP):c.196G>A (p.Gly66Ser)	VAR_023311	158696	not specified	Benign(Last reviewed: Jan 11, 2016)	Polymorphism	Y
KIF5C	NM_004522.2(KIF5C):c.709G>A (p.Glu237Lys)	VAR_069389	140740	Cortical dysplasia, complex, with other brain malformations 2|not provided	Pathogenic(Last reviewed: Feb 15, 2017)	Polymorphism	N
KIF7	NM_198525.2(KIF7):c.1895C>T (p.Pro632Leu)	VAR_066450	129407	Acrocallosal syndrome, Schinzel type|not provided|not specified	Benign/Likely benign(Last reviewed: Dec 02, 2016)	Disease	N
KIF7	NM_198525.2(KIF7):c.3345C>G (p.His1115Gln)	VAR_066457	129415	Acrocallosal syndrome, Schinzel type|not specified	Benign/Likely benign(Last reviewed: Jun 14, 2016)	Disease	N
KIF7	NM_198525.2(KIF7):c.3013G>A (p.Gly1005Arg)	VAR_035364	96653	Acrocallosal syndrome, Schinzel type|not specified	Benign/Likely benign(Last reviewed: Jun 14, 2016)	Polymorphism	Y
KIF7	NM_198525.2(KIF7):c.2501A>G (p.Gln834Arg)	VAR_066454	252807	not provided|not specified	Likely benign(Last reviewed: Apr 12, 2017)	Polymorphism	Y
KIF7	NM_198525.2(KIF7):c.2873G>T (p.Ser958Ile)	VAR_035363	96651	Acrocallosal syndrome, Schinzel type|not specified	Benign/Likely benign(Last reviewed: Jun 14, 2016)	Polymorphism	Y
[truncated: 2,287 more rows]
